# Supplementary material for: Atom-transfer radical addition of fluoroalkyl bromides to alkenes via a photoredox/copper catalytic system
Source: Royal Society of Chemistry journal article supplement (doi:10.1039/d1cc01609a), 2021-01-01

## Supporting Information

### Atom-transfer radical addition of fluoroalkyl bromides to alkenes via photoredox/copper catalytic system

Vladislav S. Kostromitin,<sup>a,b</sup> Artem A. Zemtsov,<sup>a</sup> Vladimir A. Kokorekin,<sup>a</sup> Vitalij, V. Levin,<sup>a</sup>  
Alexander D. Dilman<sup>\*a</sup>

<sup>a</sup> *N. D. Zelinsky Institute of Organic Chemistry, 119991 Moscow, Leninsky prosp. 47, Russian Federation.*

<sup>b</sup> *Lomonosov Moscow State University, Department of Chemistry, 119991 Moscow, Leninskie Gory 1-3, Russian Federation*

#### Content

|                                                                             | Page     |
|-----------------------------------------------------------------------------|----------|
| General methods                                                             | S2       |
| Starting materials                                                          | S2-S5    |
| Reactions of <b>1a-α,γ,8</b> with alkenes and 1-pentyne (General procedure) | S5       |
| Compounds <b>3a-α,γ</b>                                                     | S5-S17   |
| Compound <b>3β</b>                                                          | S17      |
| Reaction of CF <sub>3</sub> Br with alkenes (General procedure)             | S18      |
| Compounds <b>3δ,ε</b>                                                       | S18      |
| Compounds <b>5</b> and <b>6</b>                                             | S19-S20  |
| Compound <b>9</b>                                                           | S20      |
| Stern-Volmer study                                                          | S21      |
| Quantum yield measurement                                                   | S22      |
| Cyclic voltammetry                                                          | S23      |
| References                                                                  | S24      |
| NMR spectra                                                                 | S25-S141 |



**2-Bromo-2,2-difluoroethan-1-ol.**<sup>25</sup>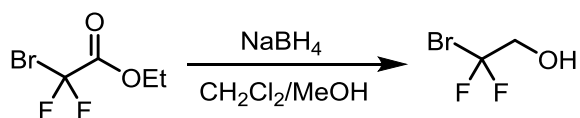

A solution of ethyl bromodifluoroacetate (12.8 mL, 100 mmol) in methanol (8 mL) was added dropwise to a refluxed suspension of sodium borohydride (2.66 g, 70 mmol) in  $\text{CH}_2\text{Cl}_2$  (40 mL). The reaction mixture was refluxed for additional 4 hours until complete homogenization. The mixture was cooled to 0-5°C with an ice/water bath and quenched by dropwise addition of diluted (10 % *wt.*) sulphuric acid (138 mL). The reaction vessel was equipped with a distilling head and all volatile compounds were distilled with steam until the temperature of the vapor reached 100°C. The distillate was transferred into a separatory funnel, the aqueous phase was separated. The organic phase was stirred with solid ammonium chloride (*ca.* 1g), filtered, and subjected to distilled with a Vigreux column (under ambient pressure, fraction with bp 97-108 °C was collected), affording 13.2 g of crude 2-bromo-2,2-difluoroethan-1-ol in a mixture with EtOH (10 % *wt.*). Then, the obtained materials was mixed with concentrated sulfuric acid (6.6 mL) and concentrated hydrochloric acid (6.6 mL), the resulting mixture was stirred for 30 minutes at room temperature and 15 minutes at 80 °C. The emulsion was extracted with  $\text{CH}_2\text{Cl}_2$  (3×5 mL), the combined organic phases were shaken with solid  $\text{NaHCO}_3$  (*ca.* 1g) and filtered. The solvent was evaporated at room pressure with Vigreux column, the residue was distilled using a Hickman distilling head (oil bath temperature 120 – 140 °C). Yield 10.9 g (68 %).

$^1\text{H}$  NMR (300 MHz,  $\text{CDCl}_3$ ),  $\delta$ : 4.03 (t,  $J$  = 11.5 Hz, 2H), 3.18 – 2.82 (m, 1H).

$^{13}\text{C}\{^1\text{H}\}$  NMR (75 MHz,  $\text{CDCl}_3$ ),  $\delta$ : 121.6 (t,  $J$  = 307.1 Hz), 68.6 (t,  $J$  = 27.0 Hz).

$^{19}\text{F}$  NMR (282 MHz,  $\text{CDCl}_3$ ),  $\delta$ : -58.50 – -58.69 (m).

**2-(2-Bromo-2,2-difluoroethoxy)-2,3,3-trimethylbutane (1u).**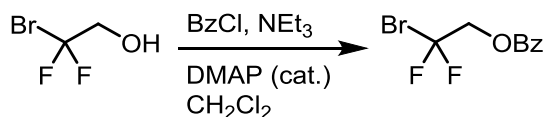

Triethylamine (1.67 mL, 12 mmol), 4-(dimethylamino)pyridine (244 mg, 2 mmol) and benzoyl chloride (1.39 mL, 12 mmol) were added to a stirred solution of 2-bromo-2,2-difluoroethan-1-ol (1.61 g, 10 mmol) in  $\text{CH}_2\text{Cl}_2$  at 0°C. The mixture was stirred overnight at room temperature, then diluted with water (15 mL), the organic phase was separated, the aqueous phase was extracted with hexane (3×5 mL). The combined organic layers were dried over  $\text{Na}_2\text{SO}_4$  and concentrated under reduced pressure (100 Torr). The residue was distilled under vacuum (10

Torr) using a Hickman distilling head (oil bath temperature 120 – 140°C). The product was obtained as a colourless oil. Yield 2.39 g (90 %).

$^1\text{H}$  NMR (300 MHz,  $\text{CDCl}_3$ ),  $\delta$ : 8.10 (dd,  $J = 8.4, 1.4$  Hz, 2H), 7.61 (t,  $J = 7.4$  Hz, 1H), 7.48 (ddd,  $J = 8.4, 7.4, 1.4$  Hz, 2H), 4.84 (t,  $J = 11.5$  Hz, 1H).

$^{13}\text{C}\{^1\text{H}\}$  NMR (75 MHz,  $\text{CDCl}_3$ ),  $\delta$ : 164.9, 133.9, 130.1, 128.7, 118.4 (t,  $J = 305.9$  Hz), 67.5 (t,  $J = 27.8$  Hz).

$^{19}\text{F}$  NMR (282 MHz,  $\text{CDCl}_3$ ),  $\delta$ : -56.04 (t,  $J = 11.5$  Hz).

HRMS (ESI-TOF): calcd for  $\text{C}_9\text{H}_7^{79}\text{BrF}_2\text{O}_2\text{Ag}$  [ $\text{M}+\text{Ag}$ ]: 370.8643; found 370.8730.

### 2-(2-Bromo-2,2-difluoroethoxy)-2,3,3-trimethylbutane (**1 $\alpha$** ).

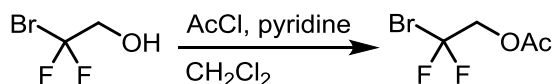

Pyridine (1.05 mL, 13 mmol) and acetyl chloride (0.92 mL, 13 mmol) were added to a stirred solution of 2-bromo-2,2-difluoroethan-1-ol (1.61 g, 10 mmol) in  $\text{CH}_2\text{Cl}_2$  at 0°C. The mixture was stirred overnight at room temperature, then diluted with water (15 mL), the organic phase was separated, the aqueous phase was extracted with pentane (3×5 mL). The combined organic layers were washed with saturated aqueous  $\text{NaHCO}_3$ , dried over  $\text{Na}_2\text{SO}_4$  and concentrated at room pressure. The residue was distilled under vacuum (200 Torr) using a Hickman distilling head (oil bath temperature 80 – 100°C). The product was obtained as colourless oil. Yield 1.60 g (79 %).

$^1\text{H}$  NMR (300 MHz,  $\text{CDCl}_3$ ),  $\delta$ : 4.55 (t,  $J = 11.7$  Hz, 1H), 2.12 (s, 2H).

$^{13}\text{C}\{^1\text{H}\}$  NMR (75 MHz,  $\text{CDCl}_3$ ),  $\delta$ : 169.2, 118.2 (t,  $J = 305.8$  Hz), 67.0 (t,  $J = 27.3$  Hz), 20.3.

$^{19}\text{F}$  NMR (282 MHz,  $\text{CDCl}_3$ ),  $\delta$ : -56.53 (t,  $J = 11.7$  Hz).

MS (EI): calcd for  $\text{C}_2\text{H}_2^{79}\text{BrF}_2$ : 142.93 (M-OAc), 123.03 (M-Br); found 142.88, 122.95.

### *O*-(*tert*-Butyldimethylsilyl)-2-bromo-2,2-difluoroethanol (**1 $\beta$** ).<sup>26</sup>

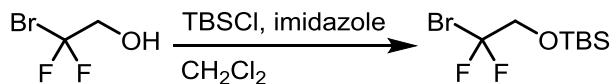

Imidazole (0.82 g, 12 mmol) and *tert*-butylchlorodimethylsilane (1.81 g, 12 mmol) were added to a stirred solution of 2-bromo-2,2-difluoroethan-1-ol (1.61 g, 10 mmol) in  $\text{CH}_2\text{Cl}_2$  at 0 °C. The mixture was stirred overnight at room temperature, then diluted with water (15 mL), the organic phase was separated, the aqueous phase was extracted with pentane (3×5 mL). The combined organic layers were dried over  $\text{Na}_2\text{SO}_4$  and concentrated under reduced pressure (400 Torr). The



residue was distilled under vacuum (10 torr) using a Hickman distilling head (oil bath temperature 90 – 110°C). The product was obtained as colourless oil. Yield 2.34 (85 %).

$^1\text{H}$  NMR (300 MHz,  $\text{CDCl}_3$ ),  $\delta$ : 4.05 (t,  $J$  = 11.6 Hz, 2H), 0.93 (s, 9H), 0.13 (s, 6H).

$^{13}\text{C}\{^1\text{H}\}$  NMR (75 MHz,  $\text{CDCl}_3$ ),  $\delta$ : 121.8 (t,  $J$  = 307.6 Hz), 69.3 (t,  $J$  = 26.9 Hz), 25.7, 18.4, -5.3.

$^{19}\text{F}$  NMR (282 MHz,  $\text{CDCl}_3$ ),  $\delta$ : -57.82 (t,  $J$  = 11.6 Hz).

HRMS (ESI-TOF): calcd for  $\text{C}_8\text{H}_{17}^{79}\text{BrF}_2\text{OSiAg}$  [ $\text{M}+\text{Ag}$ ]: 380.9246; found 380.9245.

### General procedure for the reaction of bromides **1a- $\alpha,\gamma$** with alkenes and 1-pentyne in DMSO.

A mixture of tetrabutylammonium bromide (32 mg, 0.1 mmol), IMesCuBr (22 mg, 0.05 mmol) and *fac*-Ir(ppy)<sub>3</sub> (0.8 mg, 0.00125 mmol) was evacuated, filled with argon, and dissolved in DMSO (1 mL). The reaction tube was connected to vacuum for 2 minutes upon intensive stirring at room temperature and refilled with argon. Then, bromide (0.6 mmol in case of **1a,p,s,t, $\alpha$** ; 0.75 mmol in case of **1 $\gamma$** ; 0.5 mmol in case of **1u**) and alkene (0.5 mmol in case of **2a-o,r, 8**; 0.65 mmol in case of **2q,u,v,w-z**) [or 1-pentyne (59  $\mu\text{L}$ , 0.6 mmol)] were added, the tube was screw-capped and irradiated with 455 nm (12 W) LED strip (for **3a-j,m,o,p,s, $\gamma$ - $\epsilon$** ) or 400 nm (60 W) LED matrix (for **3k-l,n,q,r,t- $\beta$**  and 1-pentyne) for 16 hours. The reaction was quenched with water (5 mL) and extracted with hexane (3 $\times$ 3 mL). The combined organic phases were filtered through a short pad of  $\text{Na}_2\text{SO}_4$  and concentrated on a rotary evaporator. The residue was purified by column chromatography.

### (3-Bromo-5,5,6,6-tetrafluorooctyl)benzene (**3a**).

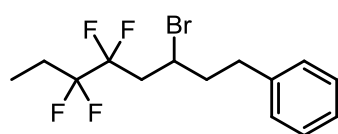

Yield 159 mg (93%). Yellow oil. Chromatography:  $\text{CH}_2\text{Cl}_2$ .  $R_f$  0.80 ( $\text{CH}_2\text{Cl}_2$ ).

$^1\text{H}$  NMR (300 MHz,  $\text{CDCl}_3$ ),  $\delta$ : 7.37 – 7.28 (m, 2H), 7.28 – 7.18 (m, 3H), 4.29 (dtd,  $J$  = 9.5, 6.5, 3.9 Hz, 1H), 3.09 – 2.59 (m, 4H), 2.44 – 1.96 (m, 4H), 1.16 (t,  $J$  = 7.5 Hz, 3H).

$^{13}\text{C}\{^1\text{H}\}$  NMR (75 MHz,  $\text{CDCl}_3$ ),  $\delta$ : 140.6, 128.66, 128.65, 126.4, 119.2 (tt,  $J$  = 249.1, 35.6 Hz), 118.3 (tt,  $J$  = 251.7, 36.5 Hz), 45.61 – 45.44 (m), 40.9, 39.4 (t,  $J$  = 21.6 Hz), 33.6, 23.2 (t,  $J$  = 23.5 Hz), 4.9 (t,  $J$  = 5.1 Hz).

$^{19}\text{F}$  NMR (282 MHz,  $\text{CDCl}_3$ ),  $\delta$ : -113.7 (ddt,  $J$  = 264.7, 27.8, 9.2 Hz), -115.7 (ddt,  $J$  = 264.7, 26.6, 9.2 Hz), -118.1 (tt,  $J$  = 18.6, 9.2 Hz).

Calcd for  $\text{C}_{14}\text{H}_{17}\text{BrF}_4$  (341.19): C 49.28, H 5.02; found: C 49.09, H 5.11.

**4-Bromo-6,6,7,7-tetrafluorononyl benzoate (3b).**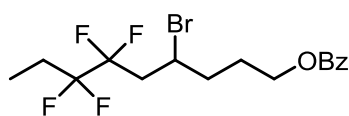

Yield 166 mg (83%). Pale-yellow oil. Chromatography: hexane/EtOAc (15/1).  $R_f$  0.26 (hexane/EtOAc, 15/1).

$^1\text{H}$  NMR (300 MHz,  $\text{CDCl}_3$ ),  $\delta$ : 8.04 (d,  $J = 7.5$  Hz, 2H), 7.56 (t,  $J = 7.5$  Hz, 1H), 7.44 (t,  $J = 7.5$  Hz, 2H), 4.45 – 4.31 (m, 3H), 2.93 – 2.51 (m, 2H), 2.24 – 1.89 (m, 6H), 1.09 (t,  $J = 7.5$  Hz, 3H).

$^{13}\text{C}\{^1\text{H}\}$  NMR (75 MHz,  $\text{CDCl}_3$ ),  $\delta$ : 166.6, 133.1, 130.4, 129.7, 128.5, 120.2 (tt,  $J = 249.0$ , 35.5 Hz), 118.2 (tt,  $J = 251.7$ , 36.6 Hz), 64.1, 45.4, 39.5 (t,  $J = 21.7$  Hz), 36.02 – 35.64 (m), 26.9, 23.3 (t,  $J = 23.5$  Hz), 4.9 (t,  $J = 5.1$  Hz).

$^{19}\text{F}$  NMR (282 MHz,  $\text{CDCl}_3$ ),  $\delta$ : -113.72 (ddt,  $J = 265.4$ , 27.5, 9.1 Hz), -115.72 (ddt,  $J = 265.4$ , 26.2, 9.1 Hz), -118.06 (tt,  $J = 18.1$ , 9.1 Hz).

HRMS (ESI-TOF): calcd for  $\text{C}_{16}\text{H}_{23}^{81}\text{BrF}_4\text{NO}_2$  [ $\text{M}+\text{NH}_4$ ]: 418.0823; found 418.0823.

**5-Bromo-7,7,8,8-tetrafluoro-1-(methoxymethoxy)decane (3c).**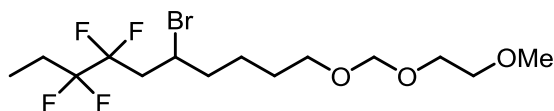

Yield 145 mg (73%). Pale-yellow oil. Chromatography: hexane/EtOAc (15/1).  $R_f$  0.23 (hexane/EtOAc, 15/1).

$^1\text{H}$  NMR (300 MHz,  $\text{CDCl}_3$ ),  $\delta$ : 4.70 (s, 2H), 4.36 – 4.21 (m, 1H), 3.73 – 3.64 (m, 2H), 3.62 – 3.51 (m, 4H), 3.38 (s, 3H), 2.87 – 2.47 (m, 2H), 2.14 – 1.80 (m, 4H), 1.72 – 1.44 (m, 4H), 1.08 (t,  $J = 7.5$  Hz, 3H).

$^{13}\text{C}\{^1\text{H}\}$  NMR (75 MHz,  $\text{CDCl}_3$ ),  $\delta$ : 119.2 (tt,  $J = 249.0$ , 35.5 Hz), 118.3 (tt,  $J = 251.4$ , 36.3 Hz), 95.7, 72.0, 67.6, 66.9, 59.1, 46.0 (t,  $J = 2.9$  Hz), 39.5 (t,  $J = 21.6$  Hz), 39.1, 29.0, 24.2, 23.3 (t,  $J = 23.6$  Hz), 4.9 (t,  $J = 5.1$  Hz).

$^{19}\text{F}$  NMR (282 MHz,  $\text{CDCl}_3$ ),  $\delta$ : -114.0 (ddt,  $J = 265.0$ , 28.9, 9.5 Hz), -115.8 (ddt,  $J = 265.0$ , 24.7, 9.5 Hz), -118.2 (tt,  $J = 18.1$ , 9.5 Hz).

HRMS (ESI-TOF): calcd for  $\text{C}_{14}\text{H}_{29}^{81}\text{BrF}_4\text{NO}_3$  [ $\text{M}+\text{NH}_4$ ]: 416.1242; found 416.1242.

**O-(4-Bromo-6,6,7,7-tetrafluorononyl)-dimethylcarbamothioate (3d).**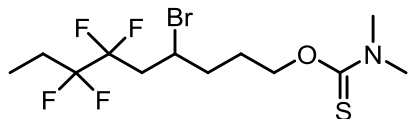

Yield 157 mg (82%). Yellow oil. Chromatography: hexane/EtOAc (8/1).  $R_f$  0.22 (hexane/EtOAc, 8/1).

$^1\text{H}$  NMR (300 MHz,  $\text{CDCl}_3$ ),  $\delta$ : 4.44 (t,  $J = 5.6$  Hz, 2H), 4.36 – 4.23 (m, 1H), 3.31 (s, 3H), 3.06 (s, 3H), 2.86 – 2.44 (m, 2H), 2.13 – 1.78 (m, 6H), 1.04 (t,  $J = 7.5$  Hz, 3H).

$^{13}\text{C}\{^1\text{H}\}$  NMR (75 MHz,  $\text{CDCl}_3$ ),  $\delta$ : 188.1, 119.0 (tt,  $J = 249.0, 35.5$  Hz), 118.1 (tt,  $J = 251.9, 251.1, 36.3$  Hz), 70.4, 45.4 (t,  $J = 2.5$  Hz), 42.7, 39.3 (t,  $J = 21.6$  Hz), 37.7, 35.7, 26.7, 23.1 (t,  $J = 23.5$  Hz), 4.8 (t,  $J = 5.1$  Hz).

$^{19}\text{F}$  NMR (282 MHz,  $\text{CDCl}_3$ ),  $\delta$ : -113.8 (ddt,  $J = 264.9, 27.5, 8.6$  Hz), -115.9 (ddt,  $J = 264.9, 25.9, 8.6$  Hz), -118.2 (tt,  $J = 17.4, 8.6$  Hz).

HRMS (ESI-TOF): calcd for  $\text{C}_{12}\text{H}_{21}^{79}\text{BrF}_4\text{NOS}$  [ $\text{M}+\text{H}$ ]: 382.0458; found 382.0448.

**[4-Bromo-6,6,7,7-tetrafluorononyl]oxy(*tert*-butyl)dimethylsilane (3e).**

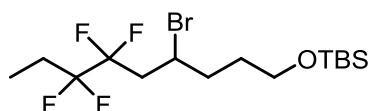

Yield 170 mg (83%). Colorless oil. Chromatography: hexane/EtOAc (50/1).  $R_f$  0.37 (hexane/EtOAc, 50/1).

$^1\text{H}$  NMR (300 MHz,  $\text{CDCl}_3$ ),  $\delta$ : 4.42 – 4.27 (m, 1H), 3.65 (t,  $J = 5.8$  Hz, 2H), 2.89 – 2.48 (m, 2H), 2.17 – 1.59 (m, 6H), 1.09 (t,  $J = 7.5$  Hz, 3H), 0.89 (s, 9H), 0.05 (s, 6H).

$^{13}\text{C}\{^1\text{H}\}$  NMR (75 MHz,  $\text{CDCl}_3$ ),  $\delta$ : 119.2 (tt,  $J = 249.3, 35.5$  Hz), 118.3 (tt,  $J = 251.4, 36.4$  Hz), 62.2, 46.2 (t,  $J = 2.8$  Hz), 39.6 (t,  $J = 21.6$  Hz), 36.0, 30.6, 26.0, 23.3 (t,  $J = 23.5$  Hz), 18.4, 4.9 (t,  $J = 5.1$  Hz), -5.3.

$^{19}\text{F}$  NMR (282 MHz,  $\text{CDCl}_3$ ),  $\delta$ : -114.1 (ddt,  $J = 265.1, 27.7, 9.1$  Hz), -115.6 (ddt,  $J = 265.1, 25.7, 9.1$  Hz), -118.2 (tt,  $J = 18.1, 9.1$  Hz).

HRMS (ESI-TOF): calcd for  $\text{C}_{15}\text{H}_{30}^{81}\text{BrF}_4\text{OSi}$  [ $\text{M}+\text{H}$ ]: 411.1160; found 411.1154.

**{[(4-Bromo-6,6,7,7-tetrafluorononyl)oxy]methyl}benzene (3f).**

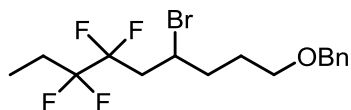

Yield 164 mg (85%). Colorless oil. Chromatography: hexane/EtOAc (10/1).  $R_f$  0.48 (hexane/EtOAc, 10/1).

$^1\text{H}$  NMR (300 MHz,  $\text{CDCl}_3$ ),  $\delta$ : 7.44 – 7.25 (m, 5H), 4.53 (s, 2H), 4.37 (dtd,  $J = 8.7, 6.6, 3.8$  Hz, 1H), 3.54 (td,  $J = 6.0, 1.0$  Hz, 2H), 2.93 – 2.52 (m, 2H), 2.23 – 1.91 (m, 5H), 1.95 – 1.71 (m, 1H), 1.12 (t,  $J = 7.5$  Hz, 3H).

$^{13}\text{C}\{^1\text{H}\}$  NMR (75 MHz,  $\text{CDCl}_3$ ),  $\delta$ : 138.5, 128.5, 127.7, 127.62, 119.2 (tt,  $J = 249.1, 35.5$  Hz), 118.2 (tt,  $J = 251.5, 36.2$  Hz), 73.0, 69.3, 46.0, 39.5 (t,  $J = 21.6$  Hz), 36.2, 27.7, 23.3 (t,  $J = 23.6$  Hz), 4.9 (t,  $J = 5.2$  Hz).

$^{19}\text{F}$  NMR (282 MHz,  $\text{CDCl}_3$ ),  $\delta$ : -114.2 (ddt,  $J = 265.1, 28.5, 9.2$  Hz), -115.8 (ddt,  $J = 265.1, 25.4, 9.2$  Hz), -118.29 (t,  $J = 18.7, 9.2$  Hz).

HRMS (ESI-TOF): calcd for  $\text{C}_{16}\text{H}_{25}^{79}\text{BrF}_4\text{NO}$  [ $\text{M}+\text{NH}_4$ ]: 402.1050; found 402.1051.

**4-[(3-Bromo-5,5,6,6-tetrafluorooctyl)oxy]benzonitrile (3g).**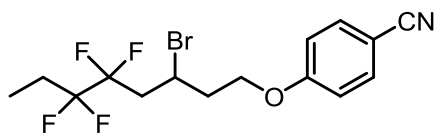

Yield 141 mg (74%). Pale-yellow oil. Chromatography: hexane/EtOAc (6/1).  $R_f$  0.25 (hexane/EtOAc, 6/1).

$^1\text{H}$  NMR (300 MHz,  $\text{CDCl}_3$ ),  $\delta$ : 7.57 (d,  $J = 8.8$  Hz, 2H), 6.95 (d,  $J = 8.8$  Hz, 2H), 4.54 (dtd,  $J = 9.8, 6.5, 3.2$  Hz, 1H), 4.31 – 4.15 (m, 2H), 2.97 – 2.59 (m, 2H), 2.52 (dddd,  $J = 14.7, 8.4, 6.2, 3.2$  Hz, 1H), 2.23 (ddt,  $J = 14.7, 9.8, 4.6$  Hz, 1H), 2.03 (tq,  $J = 18.9, 7.6$  Hz, 2H), 1.09 (t,  $J = 7.6$  Hz, 3H).

$^{13}\text{C}\{^1\text{H}\}$  NMR (75 MHz,  $\text{CDCl}_3$ ),  $\delta$ : 161.9, 134.1, 119.2, 119.1 (tt,  $J = 249.1, 35.4$  Hz), 118.1 (tt,  $J = 251.6, 36.9$  Hz), 115.3, 104.4, 66.0, 42.0 (t,  $J = 3.1$  Hz), 39.6 (t,  $J = 21.7$  Hz), 38.3, 23.2 (t,  $J = 23.5$  Hz), 4.8 (t,  $J = 5.1$  Hz).

$^{19}\text{F}$  NMR (282 MHz,  $\text{CDCl}_3$ ),  $\delta$ : -113.6 (ddt,  $J = 265.1, 28.0, 9.0$  Hz), -115.5 (ddt,  $J = 265.1, 25.5, 9.0$  Hz), -118.0 (tt,  $J = 17.9, 9.0$  Hz).

HRMS (ESI-TOF): calcd for  $\text{C}_{15}\text{H}_{20}^{81}\text{BrF}_4\text{N}_2\text{O}$  [ $\text{M}+\text{NH}_4$ ]: 401.0670; found 401.0667.

**4-Bromo-6,6,7,7-tetrafluorononan-1-ol (3h).**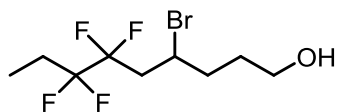

Yield 109 mg (74%). Colorless oil. Chromatography: hexane/EtOAc (3/1).  $R_f$  0.15 (hexane/EtOAc, 3/1).

$^1\text{H}$  NMR (300 MHz,  $\text{CDCl}_3$ ),  $\delta$ : 4.33 (dtd,  $J = 9.7, 6.5, 3.7$  Hz, 1H), 3.69 (t,  $J = 6.2$  Hz, 2H), 2.90 – 2.49 (m, 2H), 2.19 – 1.61 (m, 6H), 1.53 (s, 1H), 1.08 (t,  $J = 7.5$  Hz, 3H).

$^{13}\text{C}\{^1\text{H}\}$  NMR (75 MHz,  $\text{CDCl}_3$ ),  $\delta$ : 119.1 (tt,  $J = 249.1, 35.3$  Hz), 118.2 (tt,  $J = 251.5, 36.5$  Hz), 62.0, 45.7 (t,  $J = 2.5$  Hz), 39.4 (t,  $J = 21.6$  Hz), 35.6, 29.9, 23.2 (t,  $J = 23.5$  Hz), 4.93 – 4.69 (m).

$^{19}\text{F}$  NMR (282 MHz,  $\text{CDCl}_3$ ),  $\delta$ : -114.1 (ddt,  $J = 264.7, 28.1, 8.5$  Hz), -115.8 (ddt,  $J = 264.7, 25.7, 8.5$  Hz), -118.2 (tt,  $J = 18.0, 8.5$  Hz).

HRMS (ESI-TOF): calcd for  $\text{C}_9\text{H}_{14}^{79}\text{BrF}_4$  [ $\text{M}-\text{OH}$ ]: 277.0210; found 277.0216.

**1-[(5-Bromo-7,7,8,8-tetrafluorodecyl)oxy]-4-iodobenzene (3i).**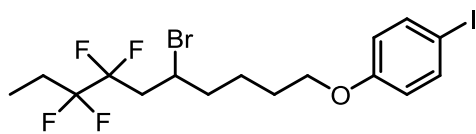

Yield 225 mg (88%). Pale-yellow oil. Chromatography: hexane/EtOAc (20/1).  $R_f$  0.29 (hexane/EtOAc, 20/1).

Final purification was performed by preparative HPLC (reversed-phase column C18, 21×250 mm, 5  $\mu\text{m}$ ), flow rate 8  $\text{mL} \cdot \text{min}^{-1}$ ; mobile phase: isocratic, acetonitrile/water, 5% water;  $t_R = 18.1$  min).

$^1\text{H}$  NMR (300 MHz,  $\text{CDCl}_3$ ),  $\delta$ : 7.55 (d,  $J = 8.8$  Hz, 2H), 6.67 (d,  $J = 8.89$  Hz, 2H), 4.36 – 4.29 (m, 1H), 3.94 (t,  $J = 6.0$  Hz, 2H), 2.70 (m, 2H), 2.16 – 1.56 (m, 8H), 1.10 (t,  $J = 7.5$  Hz, 3H).

$^{13}\text{C}\{^1\text{H}\}$  NMR (75 MHz,  $\text{CDCl}_3$ ),  $\delta$ : 158.9, 138.3, 119.1 (tt,  $J = 249.0, 35.5$  Hz), 118.2 (tt,  $J = 251.9, 36.4$  Hz), 117.0, 82.7, 67.7, 45.9 (t,  $J = 2.6$  Hz), 39.4 (t,  $J = 21.6$  Hz), 38.9, 28.4, 24.1, 23.2 (t,  $J = 23.5$  Hz), 4.9 (t,  $J = 5.1$  Hz).

$^{19}\text{F}$  NMR (282 MHz,  $\text{CDCl}_3$ ),  $\delta$ : -114.0 (ddt,  $J = 264.9, 28.2, 9.1$  Hz), -115.7 (ddt,  $J = 264.9, 26.0, 9.1$  Hz), -118.1 (tt,  $J = 18.5, 9.1$  Hz).

HRMS (ESI-TOF): calcd for  $\text{C}_{16}\text{H}_{24}^{79}\text{BrF}_4\text{INO}$  [ $\text{M}+\text{NH}_4$ ]: 528.0017; found 528.0033.

### 1-[(2-Bromo-4,4,5,5-tetrafluoroheptyl)oxy]-4-methoxybenzene (3j).

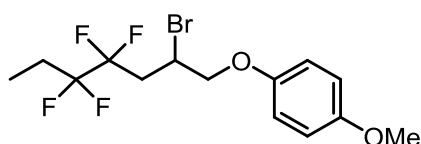

Yield 136 mg (74%). Colorless oil. Chromatography: hexane/EtOAc (20/1).  $R_f$  0.29 (hexane/EtOAc, 20/1).

$^1\text{H}$  NMR (300 MHz,  $\text{CDCl}_3$ ),  $\delta$ : 6.93 – 6.80 (m, 4H), 4.50 (p,  $J = 5.6$  Hz, 1H), 4.25 (dd,  $J = 10.4, 5.8$  Hz, 1H), 4.18 (dd,  $J = 10.4, 5.8$  Hz, 1H), 3.78 (s, 3H), 3.02 (tdd,  $J = 17.4, 17.1, 5.8$  Hz, 1H), 2.69 (tdd,  $J = 18.2, 17.1, 5.8$  Hz, 1H), 2.06 (tq,  $J = 18.8, 7.6$  Hz, 2H), 1.12 (t,  $J = 7.6$  Hz, 3H).

$^{13}\text{C}\{^1\text{H}\}$  NMR (75 MHz,  $\text{CDCl}_3$ ),  $\delta$ : 154.8, 152.3, 119.2 (tt,  $J = 248.9, 35.3$  Hz), 118.3 (tt,  $J = 251.4, 36.3$  Hz), 116.4, 114.9, 72.7, 55.8, 40.6 (t,  $J = 3.0$  Hz), 35.9 (t,  $J = 21.9$  Hz), 23.3 (t,  $J = 23.5$  Hz), 4.9 (t,  $J = 5.2$  Hz).

$^{19}\text{F}$  NMR (282 MHz,  $\text{CDCl}_3$ ),  $\delta$ : -114.7 – -115.2 (m), -117.8 – -118.3 (m).

HRMS (ESI-TOF): calcd for  $\text{C}_{14}\text{H}_{17}^{81}\text{BrF}_4\text{O}_2\text{Na}$  [ $\text{M}+\text{Na}$ ]: 397.0220; found 397.0218.

### 3-Bromo-5,5,6,6-tetrafluorooctyl 4-chlorobenzoate (3k).

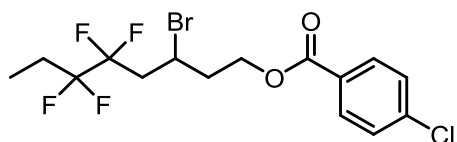

Yield 157 mg (75%). Pale-yellow oil. Chromatography: hexane/EtOAc (15/1).  $R_f$  0.31 (hexane/EtOAc, 15/1). Final purification was performed by preparative HPLC (reversed-phase column C18, 21×250 mm, 5  $\mu\text{m}$ ), flow rate 6  $\text{mL}\cdot\text{min}^{-1}$ ; mobile phase: isocratic, acetonitrile/water, 15% water;  $t_R = 29.5$  min).

$^1\text{H}$  NMR (300 MHz,  $\text{CDCl}_3$ ),  $\delta$ : 7.95 (d,  $J = 8.5$  Hz, 2H), 7.41 (d,  $J = 8.5$  Hz, 2H), 4.65 – 4.40 (m, 3H), 2.99 – 2.35 (m, 3H), 2.33 – 2.15 (m, 1H), 2.03 (tq,  $J = 18.9, 7.5$  Hz, 2H), 1.09 (t,  $J = 7.5$  Hz, 3H).

$^{13}\text{C}\{^1\text{H}\}$  NMR (75 MHz,  $\text{CDCl}_3$ ),  $\delta$ : 165.5, 139.7, 131.1, 128.9, 128.5, 119.2 (tt,  $J = 249.1$ , 35.4 Hz), 118.2 (tt,  $J = 251.7$ , 37.0 Hz), 63.0, 41.8 (t,  $J = 2.9$  Hz), 39.6 (t,  $J = 21.6$  Hz), 37.9, 23.2 (t,  $J = 23.5$  Hz), 4.9 (t,  $J = 5.1$  Hz).

$^{19}\text{F}$  NMR (282 MHz,  $\text{CDCl}_3$ ),  $\delta$ : -113.2 (ddt,  $J = 265.0$ , 27.9, 9.0 Hz), -115.6 (ddt,  $J = 265.0$ , 25.5, 9.0 Hz), -117.9 (tt,  $J = 18.9$ , 9.0 Hz).

HRMS (ESI-TOF): calcd for  $\text{C}_{15}\text{H}_{16}^{81}\text{Br}^{37}\text{ClF}_4\text{O}_2\text{Na}$  [ $\text{M}+\text{Na}$ ]: 444.9801; found 444.9803.

**1-(2-Bromo-4,4,5,5-tetrafluoroheptyl)-2-methoxybenzene (3l).**

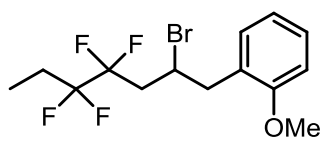

Yield 161 mg (90%). Colorless oil. Chromatography: hexane/EtOAc (20/1).  $R_f$  0.43 (hexane/EtOAc, 20/1). Final purification was performed by preparative HPLC (reversed-phase column C18, 21×250 mm, 5  $\mu\text{m}$ ), flow rate 8  $\text{mL}\cdot\text{min}^{-1}$ ; mobile phase: isocratic, acetonitrile/water, 10% water;  $t_R = 14.0$  min).

$^1\text{H}$  NMR (300 MHz,  $\text{CDCl}_3$ ),  $\delta$ : 7.35 – 7.35 (m, 1H), 7.19 (d,  $J = 7.3$  Hz, 1H), 6.99 – 6.86 (m, 2H), 4.67 (p,  $J = 6.1$  Hz, 1H), 3.85 (s, 3H), 3.40 (dd,  $J = 14.0$ , 5.9 Hz, 1H), 3.16 (dd,  $J = 14.0$ , 6.1 Hz, 1H), 2.77 (dd,  $J = 18.0$ , 6.1 Hz, 1H), 2.71 (dd,  $J = 18.0$ , 6.1 Hz, 1H), 2.04 (tq,  $J = 18.7$ , 7.6 Hz, 2H), 1.11 (t,  $J = 7.6$  Hz, 3H).

$^{13}\text{C}\{^1\text{H}\}$  NMR (75 MHz,  $\text{CDCl}_3$ ),  $\delta$ : 157.7, 131.5, 128.7, 126.4, 120.5, 119.3 (tt,  $J = 248.9$ , 35.4 Hz), 118.3 (tt,  $J = 251.4$ , 36.1 Hz), 110.6, 55.3, 44.3 (t,  $J = 2.7$  Hz), 41.4, 38.9 (t,  $J = 21.7$  Hz), 23.3 (t,  $J = 23.6$  Hz), 4.9 (t,  $J = 5.2$  Hz).

$^{19}\text{F}$  NMR (282 MHz,  $\text{CDCl}_3$ ),  $\delta$ : -115.2 (s), -118.5 (s).

HRMS (ESI-TOF): calcd for  $\text{C}_{14}\text{H}_{21}^{81}\text{BrF}_4\text{NO}$  [ $\text{M}+\text{NH}_4$ ]: 376.0717; found 376.0719.

**Diethyl (3-bromo-5,5,6,6-tetrafluorooctyl)phosphonate (3m).**

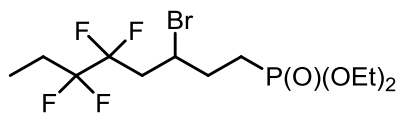

Yield 162 mg (81%). Pale-yellow oil. Chromatography: hexane/EtOAc (1/1).  $R_f$  0.15 (hexane/EtOAc, 1/1).

$^1\text{H}$  NMR (300 MHz,  $\text{CDCl}_3$ ),  $\delta$ : 4.40 – 4.26 (m, 1H), 4.21 – 3.99 (m, 4H), 2.88 – 2.45 (m, 2H), 2.38 – 2.18 (m, 1H), 2.17 – 1.76 (m, 5H), 1.31 (t,  $J = 7.1$  Hz, 6H), 1.07 (t,  $J = 7.5$  Hz, 3H).

$^{13}\text{C}\{^1\text{H}\}$  NMR (75 MHz,  $\text{CDCl}_3$ ),  $\delta$ : 118.9 (tt,  $J = 249.0$ , 35.5 Hz), 117.9 (tt,  $J = 252.2$ , 36.5 Hz), 61.6 (dd,  $J = 6.6$ , 3.6 Hz), 45.54 (dt,  $J = 19.2$ , 2.9 Hz), 38.9 (t,  $J = 21.7$  Hz), 32.3 (t,  $J = 2.9$  Hz), 24.7, 23.0 (t,  $J = 23.5$  Hz), 22.8, 16.3, 16.2, 4.6 (t,  $J = 5.2$  Hz).

$^{19}\text{F}$  NMR (282 MHz,  $\text{CDCl}_3$ ),  $\delta$ : -114.0 (ddt,  $J = 264.8, 27.6, 10.1$  Hz), -115.6 (dt,  $J = 264.8, 25.3, 10.1$  Hz), -118.1 (tt,  $J = 18.6, 10.1$  Hz).

HRMS (ESI-TOF): calcd for  $\text{C}_{12}\text{H}_{22}^{81}\text{BrF}_4\text{O}_3\text{PNa}$  [ $\text{M}+\text{Na}$ ]: 425.0298; found 425.0290.

**2-(2-Bromo-4,4,5,5-tetrafluoroheptyl)-1,3-dithiane (3n).**

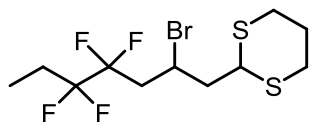

Yield 129 mg (70%). Yellow oil. Chromatography: hexane/EtOAc (8/1).  $R_f$  0.45 (hexane/EtOAc, 8/1). Final purification was performed by preparative HPLC (reversed-phase column C18, 21×250 mm, 5  $\mu\text{m}$ ), flow rate 6  $\text{mL}\cdot\text{min}^{-1}$ ; mobile phase: isocratic, acetonitrile/water, 10% water;  $t_R = 16.6$  min).

$^1\text{H}$  NMR (300 MHz,  $\text{CDCl}_3$ ),  $\delta$ : 4.55 (dddd,  $J = 10.8, 8.3, 5.7, 3.0$  Hz, 1H), 4.22 (dd,  $J = 10.8, 3.7$  Hz, 1H), 2.97 – 2.49 (m, 6H), 2.48 – 2.36 (m, 1H), 2.28 – 1.82 (m, 5H), 1.07 (t,  $J = 7.5$  Hz, 3H).

$^{13}\text{C}\{^1\text{H}\}$  NMR (75 MHz,  $\text{CDCl}_3$ ),  $\delta$ : 119.1 (tt,  $J = 249.3, 35.6$  Hz), 118.1 (tt,  $J = 251.8, 36.7, 36.7$  Hz), 44.7, 44.2, 42.6 (t,  $J = 2.5$  Hz), 39.5 (t,  $J = 21.6$  Hz), 29.7, 28.9, 25.9, 23.2 (t,  $J = 23.4$  Hz), 4.9 (t,  $J = 5.1$  Hz).

$^{19}\text{F}$  NMR (282 MHz,  $\text{CDCl}_3$ ),  $\delta$ : -112.0 (ddt,  $J = 265.6, 28.6, 9.0$  Hz), -114.5 (ddt,  $J = 265.6, 26.2, 9.0$  Hz), -117.2 (tt,  $J = 18.1, 9.0$  Hz).

HRMS (ESI-TOF): calcd for  $\text{C}_{11}\text{H}_{18}^{81}\text{BrF}_4\text{S}_2$  [ $\text{M}+\text{H}$ ]: 370.9943; found 370.9946.

**Dimethyl 2-(2-bromo-4,4,5,5-tetrafluoroheptyl)malonate (3o).**

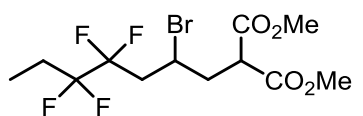

Yield 154 mg (81%). Colorless oil. Chromatography: hexane/EtOAc (10/1).  $R_f$  0.17 (hexane/EtOAc, 10/1).

$^1\text{H}$  NMR (300 MHz,  $\text{CDCl}_3$ ),  $\delta$ : 4.35 – 4.22 (m, 1H), 3.82 (dd,  $J = 10.4, 3.9$  Hz, 1H), 3.77 (s, 3H), 3.75 (s, 3H), 2.91 – 2.51 (m, 3H), 2.29 (ddd,  $J = 15.0, 11.2, 3.9$  Hz, 1H), 2.02 (tq,  $J = 18.9, 7.6$  Hz, 2H), 1.08 (t,  $J = 7.6$  Hz, 3H).

$^{13}\text{C}\{^1\text{H}\}$  NMR (75 MHz,  $\text{CDCl}_3$ ),  $\delta$ : 169.0, 168.8, 119.1 (tt,  $J = 248.9, 35.5$  Hz), 118.80 (tt,  $J = 251.7, 36.7$  Hz), 52.85, 52.79, 50.3, 43.0 (t,  $J = 2.6$  Hz), 39.6 (t,  $J = 21.7$  Hz), 38.1, 23.1 (t,  $J = 23.4$  Hz), 4.8 (t,  $J = 5.2$  Hz).

$^{19}\text{F}$  NMR (282 MHz,  $\text{CDCl}_3$ ),  $\delta$ : -113.6 (ddt,  $J = 265.0, 27.2, 10.4$  Hz), -115.3 (ddt,  $J = 265.0, 25.8, 10.4$  Hz), -117.9 – -118.2 (m).

HRMS (ESI-TOF): calcd for  $\text{C}_{12}\text{H}_{21}^{81}\text{BrF}_4\text{NO}_4$  [ $\text{M}+\text{NH}_4$ ]: 400.0565; found 400.0567.

**(3-Bromo-8,8-diethoxy-5,5,6,6-tetrafluorooctyl)benzene (3p).**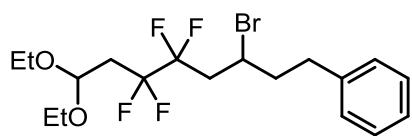

Yield 176 mg (82%). Colorless oil. Chromatography: hexane/EtOAc (20/1).  $R_f$  0.21 (hexane/EtOAc, 20/1).

$^1\text{H}$  NMR (300 MHz,  $\text{CDCl}_3$ ),  $\delta$ : 7.37 – 7.26 (m, 2H), 7.26 – 7.16 (m, 3H), 4.90 (t,  $J = 5.3$  Hz, 1H), 4.33 – 4.20 (m, 1H), 3.70 (dq,  $J = 9.1, 7.1$  Hz, 2H), 3.57 (dq,  $J = 9.0, 7.1$  Hz, 2H), 3.02 – 2.53 (m, 4H), 2.48 – 2.07 (m, 4H), 1.23 (t,  $J = 7.1$  Hz, 6H).

$^{13}\text{C}\{^1\text{H}\}$  NMR (75 MHz,  $\text{CDCl}_3$ ),  $\delta$ : 140.4, 128.62, 128.58, 126.3, 117.9 (tt,  $J = 250.6, 35.4$  Hz), 117.7 (tt,  $J = 250.6, 35.4$  Hz), 97.3 (t,  $J = 3.6$  Hz), 61.70, 61.67, 45.2 (t,  $J = 2.8$  Hz), 40.8, 39.0 (t,  $J = 21.3$  Hz), 34.6 (t,  $J = 21.1$  Hz), 33.5, 15.2.

$^{19}\text{F}$  NMR (282 MHz,  $\text{CDCl}_3$ ),  $\delta$ : -113.7 (ddt,  $J = 266.2, 28.4, 9.5$  Hz), -114.77 – -115.16 (m), -115.6 (ddt,  $J = 266.2, 26.1, 9.5$  Hz).

HRMS (ESI-TOF): calcd for  $\text{C}_{18}\text{H}_{25}^{79}\text{BrF}_4\text{O}_2\text{Na}$  [ $\text{M}+\text{Na}$ ]: 451.0866; found 451.0861.

**1-Bromo-2-(4,4-diethoxy-1,1,2,2-tetrafluorobutyl)cyclopentane (3q).**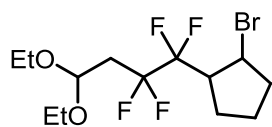

Yield 82 mg (45%). Pale-yellow oil. Chromatography: hexane/EtOAc (20/1).  $R_f$  0.33 (hexane/EtOAc, 20/1). Mixture of isomers in a ratio of 88:12 detected by GC-MS analysis.

$^1\text{H}$  NMR (300 MHz,  $\text{CDCl}_3$ ),  $\delta$ : 4.89 (t,  $J = 5.1$  Hz, 1H), 4.54 (q,  $J = 4.6$  Hz, 1H), 3.66 (dq,  $J = 9.3, 7.1$  Hz, 2H), 3.54 (dq,  $J = 9.1, 7.1$  Hz, 2H), 3.24 – 3.01 (m, 1H), 2.38 (td,  $J = 19.1, 5.1$  Hz, 2H), 2.17 – 1.99 (m, 2H), 1.99 – 1.64 (m, 4H), 1.21 (t,  $J = 7.1$  Hz, 6H).

$^{13}\text{C}\{^1\text{H}\}$  NMR (75 MHz,  $\text{CDCl}_3$ ),  $\delta$ : 118.8 (tt,  $J = 252.4, 34.8$  Hz), 118.4 (tt,  $J = 251.8, 36.2$  Hz), 97.4 (t,  $J = 3.7$  Hz), 61.76, 61.75, 51.8 (dd,  $J = 22.5, 20.3$  Hz), 48.1 (tt,  $J = 3.6, 1.3$  Hz), 39.1, 35.4 (t,  $J = 21.3$  Hz), 26.76 – 26.31 (m), 24.6, 15.3.

$^{19}\text{F}$  NMR (282 MHz,  $\text{CDCl}_3$ ),  $\delta$ : -113.0 (dd,  $J = 19.1, 8.7$  Hz), -113.2 (dd,  $J = 19.1, 8.7$  Hz), -116.7 (ddd,  $J = 270.9, 12.8, 8.7$  Hz), -121.0 (ddd,  $J = 270.9, 20.2, 8.7$  Hz).

HRMS (ESI-TOF): calcd for  $\text{C}_{13}\text{H}_{25}^{81}\text{BrF}_4\text{NO}_2$  [ $\text{M}+\text{NH}_4$ ]: 384.0979; found 384.0983.

**1-[(2-Bromo-4,4,5,5-tetrafluoro-2-methylheptyl)oxy]-4-methoxybenzene (3r).**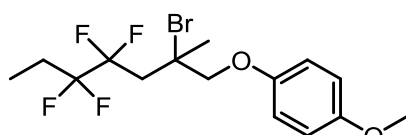

Yield 114 mg (59%). Colorless oil. Chromatography: hexane/EtOAc (20/1).  $R_f$  0.25 (hexane/EtOAc, 20/1).

$^1\text{H}$  NMR (300 MHz,  $\text{CDCl}_3$ ),  $\delta$ : 6.97 – 6.77 (m, 4H), 4.20 (d,  $J$



= 9.9 Hz, 1H), 4.13 (d,  $J$  = 9.9 Hz, 1H), 3.78 (s, 3H), 3.20 – 2.89 (m, 1H), 2.95 – 2.70 (m, 1H), 2.04 (s, 3H), 2.16 – 1.90 (m, 2H), 1.10 (t,  $J$  = 7.5 Hz, 3H).

$^{13}\text{C}\{^1\text{H}\}$  NMR (75 MHz,  $\text{CDCl}_3$ ),  $\delta$ : 154.6, 152.6, 119.1 (tt,  $J$  = 250.0, 35.5 Hz), 118.9 (tt,  $J$  = 253.1, 35.3 Hz), 116.3, 114.9, 77.44 (t,  $J$  = 2.1 Hz), 59.6, 55.8, 39.9 (t,  $J$  = 20.5 Hz), 29.2 (t,  $J$  = 2.5 Hz), 23.1 (t,  $J$  = 23.6 Hz), 4.9 (t,  $J$  = 5.2 Hz).

$^{19}\text{F}$  NMR (282 MHz,  $\text{CDCl}_3$ ),  $\delta$ : -114.1 (s), -118.4 (s).

HRMS (ESI-TOF): calcd for  $\text{C}_{15}\text{H}_{19}^{81}\text{BrF}_4\text{O}_2$  [ $\text{M}^+$ ]: 388.0479; found 388.0475.

#### 6-Bromo-3,3,4,4-tetrafluoro-8-phenyloctan-1-ol (3s).

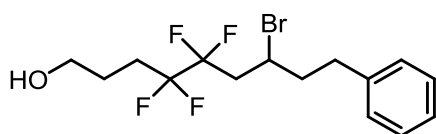

Yield 169 mg (91%). Colorless solid. Mp 39 – 42°C.

Chromatography: hexane/EtOAc (3/1).  $R_f$  0.33 (hexane/EtOAc, 3/1).

$^1\text{H}$  NMR (300 MHz,  $\text{CDCl}_3$ ),  $\delta$ : 7.43 – 7.32 (m, 2H), 7.32 – 7.22 (m, 3H), 4.31 (dtd,  $J$  = 9.6, 6.5, 3.7 Hz, 1H), 3.72 (t,  $J$  = 6.2 Hz, 2H), 3.08 – 2.58 (m, 4H), 2.43 – 2.05 (m, 4H), 1.95 – 1.80 (m, 2H).

$^{13}\text{C}\{^1\text{H}\}$  NMR (75 MHz,  $\text{CDCl}_3$ ),  $\delta$ : 140.5, 128.62, 128.60, 126.3, 119.1 (tt,  $J$  = 249.2, 35.7 Hz), 118.1 (tt,  $J$  = 251.5, 36.0 Hz), 61.7, 45.4 (t,  $J$  = 2.8 Hz), 40.8, 39.3 (t,  $J$  = 21.3 Hz), 33.5, 26.3 (t,  $J$  = 22.8 Hz), 23.8 (t,  $J$  = 3.6 Hz).

$^{19}\text{F}$  NMR (282 MHz,  $\text{CDCl}_3$ ),  $\delta$ : -112.7 (ddt,  $J$  = 264.4, 28.8, 8.3 Hz), -114.4 (ddt,  $J$  = 264.4, 26.6, 8.3 Hz), -115.2 (tt,  $J$  = 17.9, 8.3 Hz).

HRMS (ESI-TOF): calcd for  $\text{C}_{15}\text{H}_{23}^{81}\text{BrF}_4\text{NO}$  [ $\text{M}+\text{NH}_4$ ]: 390.0874; found 390.0874.

#### 4,9-Dibromo-6,6,7,7-tetrafluorononyl benzoate (3t).

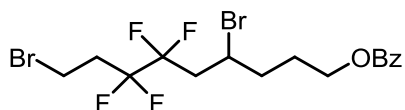

Yield 182 mg (76%). Pale-yellow oil. Chromatography:

hexane/EtOAc (15/1).  $R_f$  0.17 (hexane/EtOAc, 15/1).

$^1\text{H}$  NMR (300 MHz,  $\text{CDCl}_3$ ),  $\delta$ : 8.08 – 7.99 (m, 2H), 7.57 (t,  $J$  = 7.4 Hz, 1H), 7.45 (dd,  $J$  = 7.3, 6.9 Hz, 2H), 4.42 – 4.28 (m, 3H), 3.47 (dd,  $J$  = 8.8, 7.5 Hz, 2H), 2.92 – 2.50 (m, 4H), 2.22 – 1.88 (m, 4H).

$^{13}\text{C}\{^1\text{H}\}$  NMR (75 MHz,  $\text{CDCl}_3$ ),  $\delta$ : 166.6, 133.1, 130.3, 129.7, 128.5, 117.9 (tt,  $J$  = 251.1, 35.5 Hz), 117.8 (tt,  $J$  = 251.3, 36.3 Hz), 64.0, 44.8 (t,  $J$  = 2.8 Hz), 39.1 (t,  $J$  = 21.3 Hz), 35.9, 34.1 (t,  $J$  = 22.4 Hz), 26., 21.4 (tt,  $J$  = 5.4, 1.8 Hz).

$^{19}\text{F}$  NMR (282 MHz,  $\text{CDCl}_3$ ),  $\delta$ : -113.4 (ddt,  $J = 265.9, 27.8, 9.1$  Hz), -115.3 (ddt,  $J = 265.9, 25.0, 9.1$  Hz), -115.7 (t,  $J = 19.9, 9.1$  Hz).

HRMS (ESI-TOF): calcd for  $\text{C}_{16}\text{H}_{18}^{81}\text{Br}_2\text{F}_4\text{O}_2\text{Na}$  [ $\text{M}+\text{Na}$ ]: 502.9462; found 502.9460.

**4-Bromo-2,2-difluoro-5,5-dimethylhexyl benzoate (3u).**

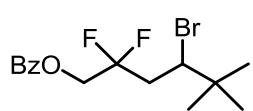

Yield 127 mg (73%). Colorless oil. Chromatography: hexane/EtOAc (15/1).  $R_f$  0.26 (hexane/EtOAc, 15/1).

$^1\text{H}$  NMR (300 MHz,  $\text{CDCl}_3$ ),  $\delta$ : 8.07 (d,  $J = 7.2$  Hz, 2H), 7.60 (t,  $J = 7.6$  Hz, 1H), 7.47 (dd,  $J = 7.6, 7.2$  Hz, 1H), 4.68 (dd,  $J = 11.3, 3.0$  Hz, 1H), 4.63 (dd,  $J = 11.3, 5.3$  Hz, 1H), 4.04 (d,  $J = 9.0$  Hz, 1H), 2.86 – 2.52 (m, 2H), 1.09 (s, 9H).

$^{13}\text{C}\{^1\text{H}\}$  NMR (75 MHz,  $\text{CDCl}_3$ ),  $\delta$ : 165.5, 133.6, 129.9, 129.2, 128.6, 121.1 (t,  $J = 243.7$  Hz), 64.0 (dd,  $J = 34.8, 30.9$  Hz), 58.5 (dd,  $J = 6.4, 3.2$  Hz), 40.0 (dd,  $J = 24.9, 23.5$  Hz), 36.2, 27.1.

$^{19}\text{F}$  NMR (282 MHz,  $\text{CDCl}_3$ ),  $\delta$ : -101.2 (dt,  $J = 257.4, 15.5, 11.3$  Hz), -105.7 (dt,  $J = 257.4, 15.5, 11.3$  Hz).

HRMS (ESI-TOF): calcd for  $\text{C}_{15}\text{H}_{23}^{81}\text{BrF}_2\text{NO}_2$  [ $\text{M}+\text{NH}_4$ ]: 368.0855; found 368.0855.

**4-Bromo-2,2-difluorooctyl benzoate (3v).**

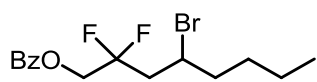

Yield 143 mg (82%). Colorless oil. Chromatography: hexane/EtOAc (20/1).  $R_f$  0.30 (hexane/EtOAc, 20/1).

$^1\text{H}$  NMR (300 MHz,  $\text{CDCl}_3$ ),  $\delta$ : 8.07 (d,  $J = 7.2$  Hz, 2H), 7.61 (t,  $J = 7.7$  Hz, 1H), 7.47 (dd,  $J = 7.6, 7.2$  Hz, 2H), 4.57 (dd,  $J = 13.2, 12.1$  Hz, 2H), 4.27 (p,  $J = 6.3$  Hz, 1H), 2.88 – 2.48 (m, 2H), 2.04 – 1.79 (m, 2H), 1.66 – 1.20 (m, 4H), 0.92 (t,  $J = 7.2$  Hz, 3H).

$^{13}\text{C}\{^1\text{H}\}$  NMR (75 MHz,  $\text{CDCl}_3$ ),  $\delta$ : 165.5, 133.7, 130.0, 129.1, 128.7, 120.7 (t,  $J = 244.3$  Hz), 64.3 (dd,  $J = 34.4, 32.2$  Hz), 47.0 (t,  $J = 4.1$  Hz), 43.6 (t,  $J = 23.6$  Hz), 39.3 (d,  $J = 1.5$  Hz), 29.5, 22.0, 14.0.

$^{19}\text{F}$  NMR (282 MHz,  $\text{CDCl}_3$ ),  $\delta$ : -100.9 (dm,  $J = 258.9$  Hz), -106.1 (dm,  $J = 258.9$  Hz).

HRMS (ESI-TOF): calcd for  $\text{C}_{15}\text{H}_{19}^{79}\text{BrF}_2\text{O}_2\text{Na}$  [ $\text{M}+\text{Na}$ ]: 371.0429; found 371.0422.

**4-Bromo-2,2-difluoro-6-(trimethylsilyl)hexyl benzoate (3w).**

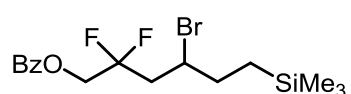
 Yield 157 mg (80%). Colorless oil. Chromatography: hexane/EtOAc (20/1).  $R_f$  0.28 (hexane/EtOAc, 20/1).

$^1\text{H}$  NMR (300 MHz,  $\text{CDCl}_3$ ),  $\delta$ : 8.07 (d,  $J = 7.2$  Hz, 2H), 7.61 (t,  $J = 7.6$  Hz, 1H), 7.47 (dd,  $J = 7.6, 7.2$  Hz, 2H), 4.58 (dd,  $J = 13.8, 11.6$  Hz, 2H), 4.25 (p,  $J = 6.2$  Hz, 1H), 2.85 – 2.52 (m, 2H), 2.03 – 1.77 (m, 2H), 0.92 – 0.54 (m, 2H), 0.01 (s, 9H).

$^{13}\text{C}\{^1\text{H}\}$  NMR (75 MHz,  $\text{CDCl}_3$ ),  $\delta$ : 165.5, 133.7, 130.0, 129.1, 128.7, 120.8 (t,  $J = 244.1$  Hz), 64.3 (dd,  $J = 34.4, 32.2$  Hz), 50.3 (t,  $J = 4.1$  Hz), 42.7 (t,  $J = 23.7$  Hz), 34.4, 14.2, -1.7.

$^{19}\text{F}$  NMR (282 MHz,  $\text{CDCl}_3$ ),  $\delta$ : -101.7 (dm,  $J = 257.8$  Hz), -106.7 (dm,  $J = 257.8$  Hz).

HRMS (ESI-TOF): calcd for  $\text{C}_{16}\text{H}_{27}^{81}\text{BrF}_2\text{NO}_2\text{Si}$  [ $\text{M}+\text{NH}_4$ ]: 412.0937; found 412.0922.

**4-Bromo-8-cyano-2,2-difluorooctyl benzoate (3x).**

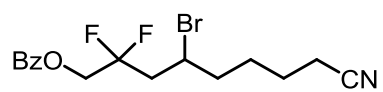
 Yield 138 mg (74%). Pale-yellow oil. Chromatography: hexane/EtOAc (4/1).  $R_f$  0.26 (hexane/EtOAc, 4/1).

$^1\text{H}$  NMR (300 MHz,  $\text{CDCl}_3$ ),  $\delta$ : 8.11 – 8.01 (m, 2H), 7.67 – 7.55 (m, 1H), 7.53 – 7.41 (m, 2H), 4.55 (dd,  $J = 13.4, 11.4$  Hz, 2H), 4.26 (dtd,  $J = 8.6, 6.5, 3.9$  Hz, 1H), 2.89 – 2.47 (m, 2H), 2.39 – 2.32 (m, 2H), 2.07 – 1.82 (m, 2H), 1.82 – 1.55 (m, 4H).

$^{13}\text{C}\{^1\text{H}\}$  NMR (75 MHz,  $\text{CDCl}_3$ ),  $\delta$ : 165.4, 133.8, 129.9, 129.0, 128.7, 120.6 (t,  $J = 244.5$  Hz), 119.4, 64.3 (t,  $J = 33.4$  Hz), 46.0 (t,  $J = 3.9$  Hz), 43.4 (t,  $J = 23.5$  Hz), 38.4, 26.6, 24.7, 17.2.

$^{19}\text{F}$  NMR (282 MHz,  $\text{CDCl}_3$ ),  $\delta$ : -102.0 (ddtd,  $J = 257.4, 21.2, 12.1, 10.9$  Hz), -107.2 (ddtd,  $J = 257.4, 20.2, 12.1, 11.0$  Hz).

HRMS (ESI-TOF): calcd for  $\text{C}_{16}\text{H}_{22}^{79}\text{BrF}_2\text{N}_2\text{O}_2$  [ $\text{M}+\text{NH}_4$ ]: 391.0827; found 391.0822.

**4,8-Dibromo-2,2-difluorooctyl benzoate (3y).**

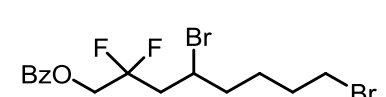
 Yield 150 mg (70%). Colorless oil. Chromatography: hexane/EtOAc (15/1).  $R_f$  0.25 (hexane/EtOAc, 15/1). Final purification was performed by preparative HPLC (reversed-phase column C18, 21×250 mm, 5  $\mu\text{m}$ ), flow rate 8  $\text{mL}\cdot\text{min}^{-1}$ ; mobile phase: isocratic, acetonitrile/water, 20% water;  $t_R = 23.7$  min).

$^1\text{H}$  NMR (300 MHz,  $\text{CDCl}_3$ ),  $\delta$ : 8.06 (d,  $J = 7.3$  Hz, 2H), 7.61 (t,  $J = 7.7$  Hz, 1H), 7.48 (dd,  $J = 7.7, 7.3$  Hz, 2H), 4.56 (dd,  $J = 13.4, 11.5$  Hz, 2H), 4.27 (dtd,  $J = 12.9, 6.5, 4.2$  Hz, 1H), 3.41 (t,  $J = 6.6$  Hz, 2H), 2.89 – 2.48 (m, 2H), 2.07 – 1.51 (m, 6H).

$^{13}\text{C}\{^1\text{H}\}$  NMR (75 MHz,  $\text{CDCl}_3$ ),  $\delta$ : 165.4, 133.8, 130.0, 129.0, 128.7, 120.7 (t,  $J = 244.3$  Hz), 64.3 (dd,  $J = 34.5, 32.3$  Hz), 46.3 (t,  $J = 4.0$  Hz), 43.5 (t,  $J = 23.4$  Hz), 38.5, 33.2, 31.9, 26.1.

$^{19}\text{F}$  NMR (282 MHz,  $\text{CDCl}_3$ ),  $\delta$ : -102.1 (ddtd,  $J = 257.8, 23.2, 12.8, 11.7$  Hz), -107.1 (ddtd,  $J = 257.8, 22.4, 12.8, 11.6$  Hz).

HRMS (ESI-TOF): calcd for  $\text{C}_{15}\text{H}_{22}^{79}\text{Br}_2\text{F}_2\text{NO}_2$  [ $\text{M}+\text{NH}_4$ ]: 443.9980; found 443.9994.

#### 5-Acetoxy-4-bromo-2,2-difluoropentyl benzoate (3z).

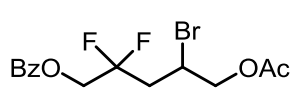 Yield 128 mg (70%). Colorless oil. Chromatography: hexane/EtOAc (6/1).  $R_f$  0.20 (hexane/EtOAc, 6/1).

$^1\text{H}$  NMR (300 MHz,  $\text{CDCl}_3$ ),  $\delta$ : 8.05 (d,  $J = 7.5$  Hz, 2H), 7.60 (t,  $J = 7.5$  Hz, 1H), 7.46 (t,  $J = 7.5$  Hz, 2H), 4.56 (dd,  $J = 13.5, 11.5$  Hz, 2H), 4.42 – 4.31 (m, 3H), 2.80 – 2.58 (m, 2H), 2.07 (s, 3H).

$^{13}\text{C}\{^1\text{H}\}$  NMR (75 MHz,  $\text{CDCl}_3$ ),  $\delta$ : 170.2, 165.3, 133.8, 129.9, 128.9, 128.7, 120.4 (t,  $J = 244.5$  Hz), 67.3, 64.1 (dd,  $J = 34.2, 32.7$  Hz), 40.6 (t,  $J = 4.2$  Hz), 39.9 (t,  $J = 24.0$  Hz), 20.7.

$^{19}\text{F}$  NMR (282 MHz,  $\text{CDCl}_3$ ),  $\delta$ : -102.7 (ddtd,  $J = 258.2, 19.8, 12.9, 12.9$  Hz), -106.3 (ddtd,  $J = 258.2, 19.1, 12.9, 12.0$  Hz).

HRMS (ESI-TOF): calcd for  $\text{C}_{14}\text{H}_{15}^{81}\text{BrF}_2\text{O}_4\text{Na}$  [ $\text{M}+\text{Na}$ ]: 388.9994; found 388.9999.

#### 4-Bromo-2,2-difluoro-6-phenylhexyl acetate (3a).

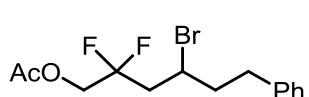 Yield 134 mg (80%). Colorless oil. Chromatography: hexane/EtOAc (10/1).  $R_f$  0.23 (hexane/EtOAc, 10/1).

$^1\text{H}$  NMR (300 MHz,  $\text{CDCl}_3$ ),  $\delta$ : 7.37 – 7.27 (m, 2H), 7.27 – 7.18 (m, 3H), 4.28 (dd,  $J = 14.3, 11.2$  Hz, 2H), 4.24 – 4.12 (m, 1H), 3.02 – 2.44 (m, 4H), 2.33 – 2.15 (m, 2H), 2.13 (s, 3H).

$^{13}\text{C}\{^1\text{H}\}$  NMR (75 MHz,  $\text{CDCl}_3$ ),  $\delta$ : 169.8, 140.5, 128.7, 128.6, 126.4, 120.5 (t,  $J = 244.3$  Hz), 64.0 (dd,  $J = 34.0, 32.2$  Hz), 46.2 (t,  $J = 4.2$  Hz), 43.4 (t,  $J = 23.5$  Hz), 41.0, 33.6, 20.6.

$^{19}\text{F}$  NMR (282 MHz,  $\text{CDCl}_3$ ),  $\delta$ : -101.1 (ddtd,  $J = 259.4, 21.1, 12.4, 11.8$  Hz), -107.02 (ddtd,  $J = 259.4, 13.5, 12.4, 12.1$  Hz).

HRMS (ESI-TOF): calcd for  $\text{C}_{14}\text{H}_{17}^{81}\text{BrF}_2\text{O}_2\text{Na}$  [ $\text{M}+\text{Na}$ ]: 359.0252; found 359.0261.

#### 4-Bromo-6,6,7,7,8,8,9,9,9-nonafluorononyl benzoate (3γ).

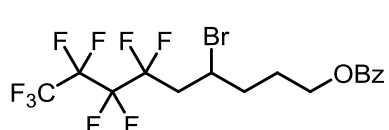 Yield 225 mg (92%). Colorless oil. Chromatography: hexane/EtOAc (10/1).  $R_f$  0.13 (hexane/EtOAc, 10/1).

$^1\text{H}$  NMR (300 MHz,  $\text{CDCl}_3$ ),  $\delta$ : 8.07 – 8.01 (m, 2H), 7.61 – 7.52

(m, 1H), 7.49 – 7.40 (m, 2H), 4.43 – 4.31 (m, 3H), 2.98 – 2.58 (m, 2H), 2.22 – 1.89 (m, 4H).

$^{13}\text{C}\{^1\text{H}\}$  NMR (75 MHz,  $\text{CDCl}_3$ ),  $\delta$ : 166.6, 133.1, 130.2, 129.7, 128.5, 117.4 (qt,  $J = 288.4$ , 33.4 Hz), 117.3 (tt,  $J = 257.5$ , 31.1 Hz), 110.2 (ttt,  $J = 265.7$ , 37.1, 31.1 Hz), 110.2 (tqt,  $J = 269.0$ , 37.1, 33.4 Hz), 63.9, 43.6 (t,  $J = 2.8$  Hz), 40.0 (t,  $J = 20.9$  Hz), 35.8, 26.8.

$^{19}\text{F}$  NMR (282 MHz,  $\text{CDCl}_3$ ),  $\delta$ : -81.9 (s, 3F), -113.2 (ddd,  $J = 271.8$ , 26.2, 12.6 Hz, 1F), -115.0 (ddd,  $J = 273.7$ , 22.1, 10.8 Hz, 1F), -125.3 (s, 2F), -126.7 (s, 2F).

HRMS (ESI-TOF): calcd for  $\text{C}_{16}\text{H}_{18}^{81}\text{BrF}_9\text{NO}_2$  [ $\text{M}+\text{NH}_4$ ]: 508.0351; found 508.0358.

**[(4-Bromo-2,2-difluoro-6-phenylhexyl)oxy](tert-butyl)dimethylsilane (3 $\beta$ ).**

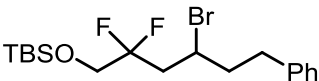 Tetrabutylammonium bromide (53 mg, 0.165 mmol), triphenylphosphine (26 mg, 0.1 mmol), IMesCuBr (22 mg, 0.05 mmol) and *fac*-Ir(ppy)<sub>3</sub> (0.8 mg, 0.00125 mmol) were dissolved in DMSO (1 mL). The reaction tube was connected to vacuum for 2 minutes upon intensive stirring at room temperature and refilled with argon. Then, bromide **1 $\beta$**  (165 mg, 0.6 mmol) and alkene **2 $\beta$**  (66 mg, 0.5 mmol) were added, the tube was screw-capped and irradiated with 400 nm (60 W) LED matrix for 24 hours. The reaction was quenched with water (5 mL) and extracted with hexane (3×3 mL). The combined organic phases were filtered through a short pad of  $\text{Na}_2\text{SO}_4$  and concentrated on a rotary evaporator. The residue was purified by column chromatography.

Yield 196 mg (96%). Pale-yellow oil. Chromatography: hexane/EtOAc (50/1).  $R_f$  0.25 (hexane/EtOAc, 50/1).

$^1\text{H}$  NMR (300 MHz,  $\text{CDCl}_3$ ),  $\delta$ : 7.38 – 7.30 (m, 2H), 7.29 – 7.23 (m, 3H), 4.27 (dtd,  $J = 9.9$ , 6.6, 3.7 Hz, 1H), 3.76 (dd,  $J = 14.5$ , 10.3 Hz, 2H), 3.04 – 2.47 (m, 4H), 2.37 – 2.11 (m, 2H), 0.95 (s, 9H), 0.12 (s, 6H).

$^{13}\text{C}\{^1\text{H}\}$  NMR (75 MHz,  $\text{CDCl}_3$ ),  $\delta$ : 140.8, 128.7, 126.3, 122.3 (t,  $J = 244.6$  Hz), 64.7 (dd,  $J = 34.7$ , 33.2 Hz), 47.2 (t,  $J = 4.2$  Hz), 42.7 (t,  $J = 23.5$  Hz), 41.0, 33.7, 25.8, 18.3, -5.4.

$^{19}\text{F}$  NMR (282 MHz,  $\text{CDCl}_3$ ),  $\delta$ : -103.0 (ddtd,  $J = 252.5$ , 22.2, 12.2, 12.1 Hz), -107.5 (ddq,  $J = 251.4$ , 20.8, 12.2, 11.7 Hz).

HRMS (ESI-TOF): calcd for  $\text{C}_{18}\text{H}_{29}^{79}\text{BrF}_2\text{OSiNa}$  [ $\text{M}+\text{Na}$ ]: 429.1031; found 429.1021.

### General procedure for the reaction of CF<sub>3</sub>Br with alkenes in acetonitrile.

A mixture of triphenylphosphine (26 mg, 0.1 mmol), IMesCuBr (22 mg, 0.05 mmol) and *fac*-Ir(ppy)<sub>3</sub> (0.8 mg, 0.00125 mmol) was evacuated, filled with argon, and dissolved in acetonitrile (1 mL). The reaction tube was cooled to -20 °C, briefly connected to vacuum (2×30 seconds) upon intensive stirring and refilled with argon. Then alkene (**2b** or **2e**, 0.5 mmol) was added. The mixture was cooled to -92 °C (acetone/liq. nitrogen) and gaseous bromotrifluoromethane (*ca.* 24 mL, 1 mmol) was gradually injected to the frozen mixture via cannula. Then, the tube was screw-capped and irradiated with a 455 nm LED strip (12 W) for 16 hours. The reaction was quenched with water (5 mL) and extracted with hexane (3×3 mL). The combined organic phases were filtered through a short pad of Na<sub>2</sub>SO<sub>4</sub> and concentrated on a rotary evaporator. The residue was purified by column chromatography.

### 4-Bromo-6,6,6-trifluorohexyl benzoate (**3δ**).

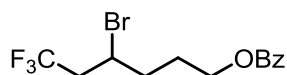

Yield 148 mg (87%). Colorless oil. Chromatography: hexane/EtOAc (10/1). *R*<sub>f</sub> 0.31 (hexane/EtOAc, 10/1).

<sup>1</sup>H NMR (300 MHz, CDCl<sub>3</sub>), δ: 8.04 (d, *J* = 7.4 Hz, 2H), 7.55 (t, *J* = 7.4 Hz, 1H), 7.43 (t, *J* = 7.4 Hz, 2H), 4.35 (dd, *J* = 6.3, 4.5 Hz, 2H), 4.22 (qd, *J* = 6.9, 3.2 Hz, 1H), 2.91 – 2.60 (m, 2H), 2.16 – 1.85 (m, 4H).

<sup>13</sup>C{<sup>1</sup>H} NMR (75 MHz, CDCl<sub>3</sub>), δ: 166.5, 133.1, 130.2, 129.6, 128.5, 125.3 (q, *J* = 278.2 Hz), 63.8, 44.3 (q, *J* = 3.4 Hz), 43.2 (q, *J* = 28.5 Hz), 35.2, 26.7.

<sup>19</sup>F NMR (282 MHz, CDCl<sub>3</sub>), δ: -64.7 (t, *J* = 10.2 Hz).

HRMS (ESI-TOF): calcd for C<sub>13</sub>H<sub>18</sub><sup>79</sup>BrF<sub>3</sub>NO<sub>2</sub> [M+NH<sub>4</sub>]: 356.0468; found 356.0474.

### 2-Bromo-4,4,4-trifluorobutyl benzoate (**3ε**).

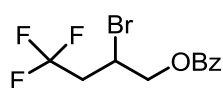

Yield 109 mg (70%). Colorless oil. Chromatography: hexane/EtOAc (15/1). *R*<sub>f</sub> 0.31 (hexane/EtOAc, 15/1).

<sup>1</sup>H NMR (300 MHz, CDCl<sub>3</sub>), δ: 8.07 (d, *J* = 7.2 Hz, 2H), 7.61 (t, *J* = 7.4 Hz, 1H), 7.48 (dd, *J* = 8.3, 7.0 Hz, 2H), 4.63 (dd, *J* = 12.2, 6.0 Hz, 1H), 4.57 (dd, *J* = 12.5, 6.1 Hz, 1H), 4.47 – 4.36 (m, 1H), 3.03 – 2.71 (m, 2H).

<sup>13</sup>C{<sup>1</sup>H} NMR (75 MHz, CDCl<sub>3</sub>), δ: 165.8, 133.7, 129.9, 129.3, 128.7, 125.2 (q, *J* = 277.7 Hz), 67.1, 40.0 (q, *J* = 29.5 Hz), 39.3 (q, *J* = 3.2 Hz).

<sup>19</sup>F NMR (282 MHz, CDCl<sub>3</sub>), δ: -64.1 (t, *J* = 9.9 Hz).

HRMS (ESI-TOF): calcd for C<sub>11</sub>H<sub>10</sub><sup>81</sup>BrF<sub>3</sub>O<sub>2</sub>Na [M+Na]: 334.9688; found 334.9684.

**4-Bromo-2,2-difluorohept-3-en-1-yl benzoate (5).** Two isomers were separated in a combined yield of 21%.

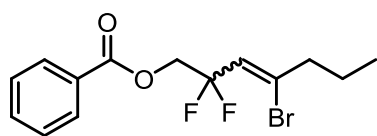

**Major isomer.** Yield 22 mg (13%). Colorless oil.

Chromatography: hexane/EtOAc (25/1).  $R_f$  0.14 (hexane/EtOAc, 25/1). Final purification was performed by preparative HPLC (reversed-phase column C18, 21×250 mm, 5  $\mu$ m), flow rate 6 mL·min<sup>-1</sup>; mobile phase: isocratic, acetonitrile/water, 10% water;  $t_R$  = 17.8 min).

<sup>1</sup>H NMR (300 MHz, CDCl<sub>3</sub>),  $\delta$ : 8.10 – 8.03 (m, 2H), 7.66 – 7.55 (m, 1H), 7.52 – 7.42 (m, 2H), 6.13 (t,  $J$  = 12.8 Hz, 1H), 4.54 (t,  $J$  = 12.8 Hz, 2H), 2.67 (tt,  $J$  = 7.3, 1.7 Hz, 2H), 1.67 (h,  $J$  = 7.3 Hz, 2H), 0.95 (t,  $J$  = 7.3 Hz, 3H).

<sup>13</sup>C{<sup>1</sup>H} NMR (75 MHz, CDCl<sub>3</sub>),  $\delta$ : 165.6, 140.0, 133.8, 130.1, 129.1, 128.7, 124.5 (t,  $J$  = 25.7 Hz), 119.4 (d,  $J$  = 243.9 Hz), 64.9 (t,  $J$  = 33.1 Hz), 39.4, 21.9, 13.1.

<sup>19</sup>F NMR (282 MHz, CDCl<sub>3</sub>),  $\delta$ : -98.0 (qt,  $J$  = 12.8, 1.7 Hz).

HRMS (ESI-TOF): calcd for C<sub>14</sub>H<sub>15</sub><sup>79</sup>BrF<sub>2</sub>O<sub>2</sub>Na [M+Na]: 355.0116; found 355.0119.

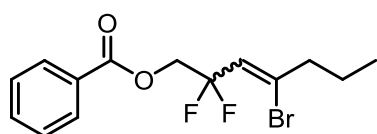

**Minor isomer.** Yield 13 mg (8%). Colorless oil.

Chromatography: hexane/EtOAc (25/1).  $R_f$  0.19 (hexane/EtOAc, 25/1). Final purification was performed by preparative HPLC (reversed-phase column C18, 21×250 mm, 5  $\mu$ m), flow rate 6 mL·min<sup>-1</sup>; mobile phase: isocratic, acetonitrile/water, 10% water;  $t_R$  = 21.0 min).

<sup>1</sup>H NMR (300 MHz, CDCl<sub>3</sub>),  $\delta$ : 8.11 – 8.03 (m, 2H), 7.65 – 7.55 (m, 1H), 7.52 – 7.40 (m, 2H), 6.10 (t,  $J$  = 11.7 Hz, 1H), 4.75 (t,  $J$  = 13.1 Hz, 2H), 2.51 (t,  $J$  = 7.5 Hz, 2H), 1.63 (h,  $J$  = 7.5 Hz, 2H), 0.91 (t,  $J$  = 7.5 Hz, 3H).

<sup>13</sup>C{<sup>1</sup>H} NMR (75 MHz, CDCl<sub>3</sub>),  $\delta$ : 165.7, 135.5 (t,  $J$  = 9.4 Hz), 133.6, 130.1, 129.3, 128.6, 122.4 (t,  $J$  = 29.5 Hz), 119.2 (d,  $J$  = 242.1 Hz), 64.0 (t,  $J$  = 32.2 Hz), 44.9, 21.2, 12.8.

<sup>19</sup>F NMR (282 MHz, CDCl<sub>3</sub>),  $\delta$ : -99.1 (tdt,  $J$  = 13.1, 11.7, 2.0 Hz).

HRMS (ESI-TOF): calcd for C<sub>14</sub>H<sub>15</sub><sup>79</sup>BrF<sub>2</sub>O<sub>2</sub>Na [M+Na]: 355.0116; found 355.0111.

**4,6-Dibromo-6-fluorohexyl benzoate (6).** Mixture of isomers in a ratio of 1.5 : 1.

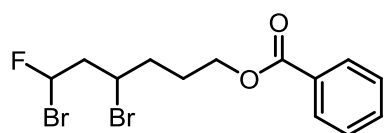

Triphenylphosphine (26 mg, 0.1 mmol), IMesCuBr (22 mg, 0.05 mmol) and *fac*-Ir(ppy)<sub>3</sub> (0.8 mg, 0.00125 mmol) were dissolved in acetonitrile (1 mL). The reaction tube was cooled to -20 °C,

briefly connected to vacuum (2×30 seconds) upon intensive stirring and refilled with argon.

Then, dibromofluoromethane (60  $\mu$ L, 0.75 mmol) and alkene **2b** (95 mg, 0.5 mmol) were added, the tube was screw-capped and irradiated with 400 nm (60 W) LED matrix for 16 hours. The reaction was quenched with water (5 mL) and extracted with hexane (3 $\times$ 3 mL). The combined organic phases were filtered through a short pad of Na<sub>2</sub>SO<sub>4</sub> and concentrated on a rotary evaporator. The residue was purified by column chromatography.

Yield 112 mg (59%). Colorless oil. Chromatography: hexane/EtOAc (15/1). *R<sub>f</sub>* 0.22 (hexane/EtOAc, 15/1). Final purification was performed by preparative HPLC (reversed-phase column C18, 21 $\times$ 250 mm, 5  $\mu$ m), flow rate 6 mL $\cdot$ min<sup>-1</sup>; mobile phase: isocratic, acetonitrile/water, 10% water; *t<sub>R</sub>* = 16.4 min).

<sup>1</sup>H NMR (300 MHz, CDCl<sub>3</sub>),  $\delta$ : 8.07 – 8.00 (m, 2H, both isomers), 7.62 – 7.53 (m, 1H, both isomers), 7.50 – 7.40 (m, 2H, both isomers), 6.74 (ddd, *J* = 51.1, 9.3, 2.2 Hz, 1H, major), 6.72 (ddd, *J* = 49.4, 7.9, 4.0 Hz, minor), 4.44 – 4.30 (m, 2H, both isomers), 4.24 – 4.08 (m, 1H, both isomers), 2.91 – 2.46 (m, 2H, both isomers), 2.14 – 1.89 (m, 4H, both isomers).

<sup>13</sup>C{<sup>1</sup>H} NMR (75 MHz, CDCl<sub>3</sub>),  $\delta$ : 166.6 (both isomers), 133.2 (both isomers), 130.2 (both isomers), 129.69 (minor), 129.68 (major), 128.5 (both isomers), 95.1 (d, *J* = 250.8 Hz, minor), 92.0 (d, *J* = 252.1 Hz, major), 64.04 (minor), 64.01 (major), 50.55 – 50.47 (m, both isomers), 50.3 (d, *J* = 16.9 Hz, major), 48.5 (d, *J* = 20.9 Hz, minor), 35.7 (major), 35.5 (minor), 26.9 (minor), 26.7 (major).

<sup>19</sup>F NMR (282 MHz, CDCl<sub>3</sub>),  $\delta$ : -132.8 (ddd, *J* = 49.4, 12.7, 9.2 Hz, minor), -138.5 (ddd, *J* = 51.1, 34.9, 10.6 Hz, major).

HRMS (ESI-TOF): calcd for C<sub>13</sub>H<sub>15</sub><sup>81</sup>Br<sub>2</sub>FO<sub>2</sub>Na [M+Na]: 406.9275; found 406.9265.

#### Dimethyl 3-(bromomethyl)-4-(2,2,3,3-tetrafluoropentyl)cyclopentane-1,1-dicarboxylate (**9**).

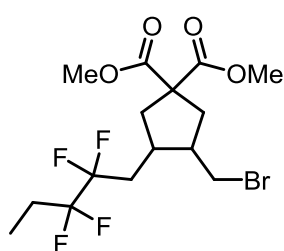

Yield 169 mg (80%). Colorless oil. Chromatography: hexane/EtOAc (10/1). *R<sub>f</sub>* 0.23 (hexane/EtOAc, 10/1). Mixture of isomers in a ratio of 93:7 detected by GC-MS analysis.

<sup>1</sup>H NMR (300 MHz, CDCl<sub>3</sub>),  $\delta$ : 3.69 (s, 6H), 3.39 (dd, *J* = 10.4, 4.9 Hz, 1H), 3.21 (dd, *J* = 10.4, 8.2 Hz, 1H), 2.61 – 2.41 (m, 4H), 2.37 – 2.28 (m, 1H), 2.23 – 1.83 (m, 5H), 1.04 (t, *J* = 7.5 Hz, 3H).

<sup>13</sup>C{<sup>1</sup>H} NMR (75 MHz, CDCl<sub>3</sub>),  $\delta$ : 172.7, 172.6, 119.2 (tt, *J* = 249.7, 36.0 Hz), 58.4, 52.9, 44.5, 39.2, 38.3, 35.3, 33.4, 29.1 (t, *J* = 22.5 Hz), 23.3 (t, *J* = 23.6 Hz), 4.8 (t, *J* = 5.1 Hz).

<sup>19</sup>F NMR (282 MHz, CDCl<sub>3</sub>),  $\delta$ : -113.9 (dd, *J* = 263.5, 30.4 Hz), -116.5 (dd, *J* = 263.5, 29.4 Hz), -118.2 (t, *J* = 18.3 Hz).

HRMS (ESI-TOF): calcd for C<sub>15</sub>H<sub>25</sub><sup>79</sup>BrF<sub>4</sub>NO<sub>4</sub> [M+NH<sub>4</sub>]: 438.0898; found 438.0894.



### Stern-Volmer study

Experiments were performed in a screw-capped quartz vial (10×10 mm). The solvent was degassed, and the vial was filled with argon. The concentration of *fac*-Ir(ppy)<sub>3</sub> was 10<sup>-2</sup> mmol/L for the quenching experiments with EtCF<sub>2</sub>CF<sub>2</sub>Br (**1a**) and TBSOCH<sub>2</sub>CF<sub>2</sub>Br (**1β**), and 10<sup>-3</sup> mmol/L for the quenching experiment with IMesCuBr.

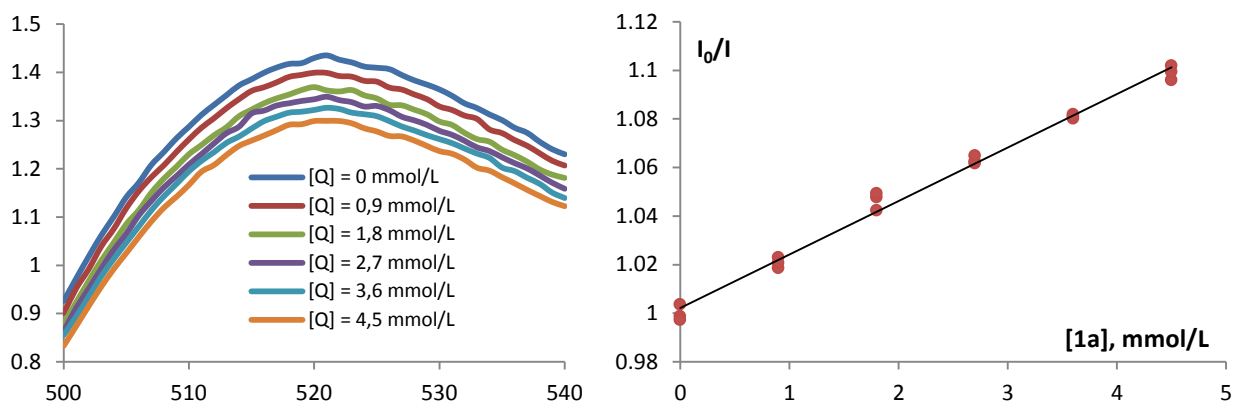

**Figure S1.** Quenching of fluorescence of *fac*-Ir(ppy)<sub>3</sub> by **1a** in DMSO at room temperature. Excitation wavelength 370 nm, fluorescence wavelength 520 nm.

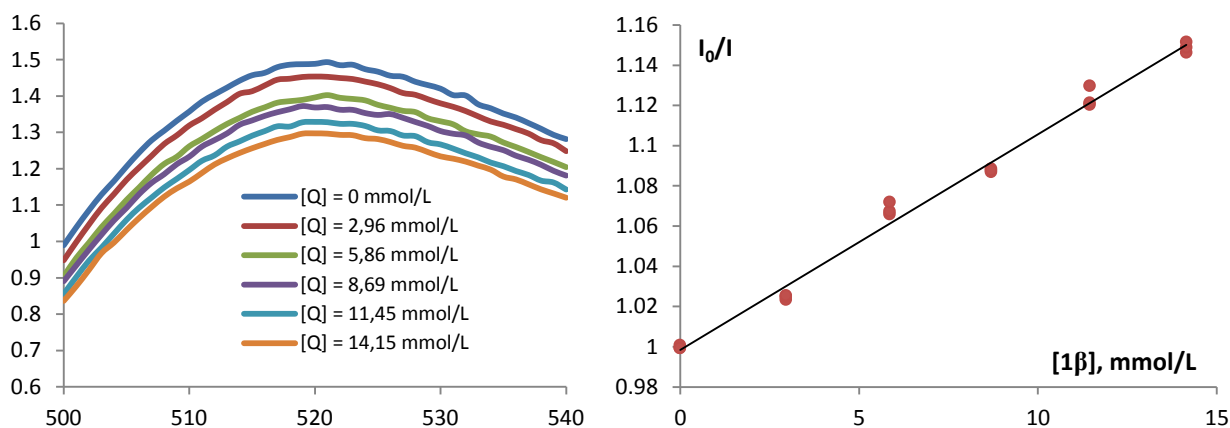

**Figure S2.** Quenching of fluorescence of *fac*-Ir(ppy)<sub>3</sub> by **1β** in DMSO at room temperature. Excitation wavelength 370 nm, fluorescence wavelength 520 nm.

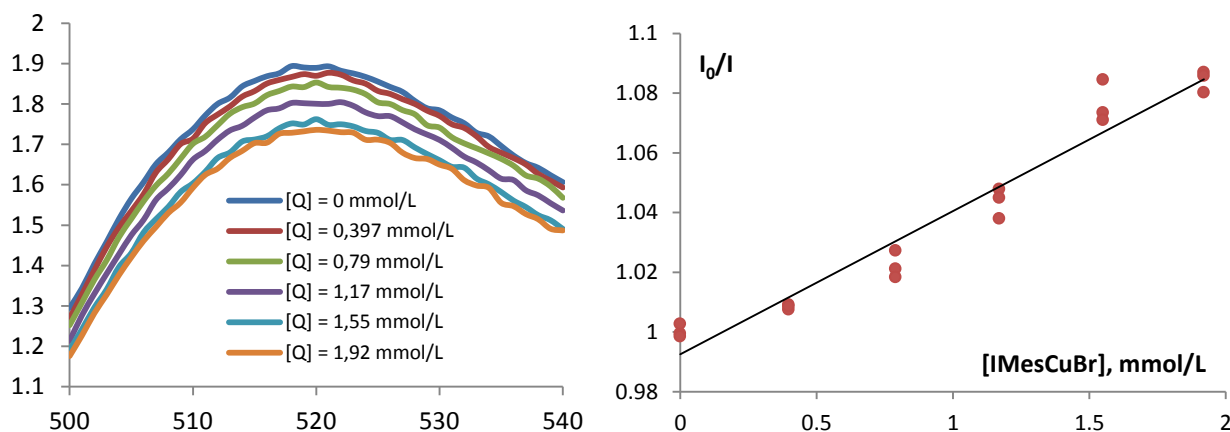

**Figure S3.** Quenching of fluorescence of *fac*-Ir(ppy)<sub>3</sub> by IMesCuBr in DMSO at room temperature. Excitation wavelength 370 nm, fluorescence wavelength 520 nm.

## Quantum yield measurement<sup>27</sup>

Quantum yield for the reaction of 4-phenyl-1-butene **1a** with EtCF<sub>2</sub>CF<sub>2</sub>Br **2a** was estimated using irradiation with a 380 mW blue laser (400 nm). Photon flux of the laser was measured by standard ferrioxalate actinometry – 6,1 µEs/min. A mixture of **1a** (132 mg, 1.0 mmol), **2a** (170 µl, 1.2 mmol), PPh<sub>3</sub> (52 mg, 0.2 mmol), IMesCuBr (44 mg, 0.1 mmol), *fac*-Ir(ppy)<sub>3</sub> (1.6 mg, 2.5 µmol) and 67 mg of tetralin (internal standard) in MeCN (2 mL) was placed in a square quartz cuvette (10×10 mm). At 400 nm, the reaction mixture completely absorbs the laser light. The cuvette was irradiated for 4 hours, and every 60 minutes the mixture was analyzed by GC. The quantum yield  $\Phi$  was calculated by the following equation:

$$\phi = \frac{\text{moles of product formed}}{\text{photon flux} \cdot \text{reaction time}} / Q = \frac{0,126}{0,239} = 0,527$$

$$Q = \text{quenching fraction} = \frac{I_0 - I}{I_0} = 0,239$$

Measurement and calculation of  $Q$ -factor was essential because strong fluorescence of the reaction mixture was observed. The fluorescence of *fac*-Ir(ppy)<sub>3</sub> (1.6 mg, 2.5 µmol) in CH<sub>3</sub>CN (2 mL) was taken as  $I_0$  and the fluorescence of a mixture of **1a** (132 mg, 1 mmol), **2a** (159 µl, 1.2 mmol), PPh<sub>3</sub> (52 mg, 0.2 mmol), IMesCuBr (44 mg, 0,1 mmol) and *fac*-Ir(ppy)<sub>3</sub> (1.6 mg, 2.5 µmol) was taken as  $I$ . The excitation wavelength was 400 nm, the registration wavelength was 520 nm.

## Cyclic voltammetry

Voltammetric studies were carried out using potentiostat P30JM with a scan rate of  $0.1 \text{ V}\cdot\text{s}^{-1}$  in a temperature-controlled ( $25^\circ\text{C}$ ) glass cell ( $V = 10 \text{ mL}$ ) under an argon atmosphere. A glassy carbon disk ( $d = 2.9 \text{ mm}$ ) was used as the working electrode (carefully polished before each measurement). A saturated calomel electrode (SCE) separated from the solution being studied by a salt bridge filled with the supporting electrolyte ( $0.1 \text{ M Et}_4\text{NClO}_4$  in DMSO) was used as the reference electrode. A platinum plate ( $S = 3 \text{ cm}^2$ ) was used as the counter electrode. All experiments were performed with the concentration of a studied compound of  $1 \text{ mM}$  in DMSO.

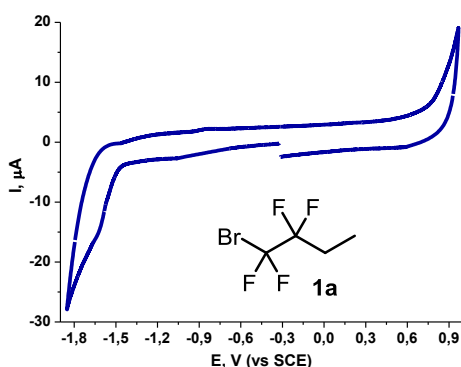

**Figure S4.** Compound **1a** (initial cathodic scan)

$E_{\text{onset}}^{\text{red}} = -1.48 \text{ V}$ ;  $E_{\text{p}}^{\text{red}} = -1.62 \text{ V}$ ;  
 $i_{\text{p}}^{\text{red}} = 11.02 \mu\text{A}$

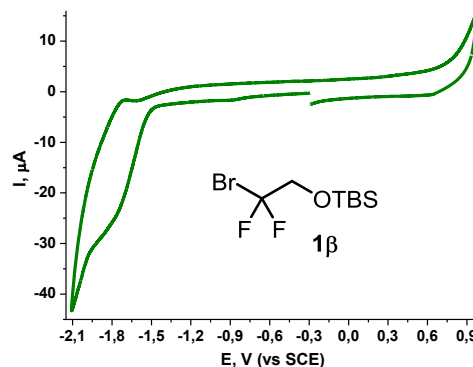

**Figure S5.** Compound **1β** (initial cathodic scan)

$E_{\text{onset}}^{\text{red}} = -1.50 \text{ V}$ ;  $E_{\text{p}}^{\text{red}} = -1.74 \text{ V}$ ;  
 $i_{\text{p}}^{\text{red}} = 21.92 \mu\text{A}$

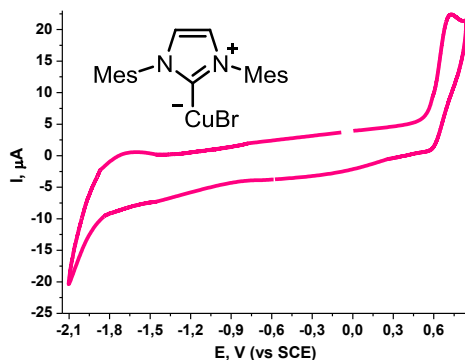

**Figure S6.** Compound **IMesCuBr** (initial anodic scan).

$E_{\text{onset}}^{\text{ox}} = +0.44 \text{ V}$ ;  $E_{\text{p}}^{\text{ox}} = +0.72 \text{ V}$ ;  
 $i_{\text{p}}^{\text{ox}} = 17.48 \mu\text{A}$

Compounds **1a** and **1β** have only corresponding irreversible reduction waves at  $E_{\text{p}}^{\text{red}} = -1.62 \text{ V}$  and  $-1.74 \text{ V}$ , respectively, but reduction starts earlier at  $E_{\text{onset}}^{\text{red}} = -1.48 \text{ V}$  and  $-1.50 \text{ V}$ . Presumably, after the reduction, the resulting anion-radical undergoes fragmentation into alkyl radical and bromide ion. IMesCuBr have only oxidation wave at  $E_{\text{p}}^{\text{ox}} = +0.72 \text{ V}$ , but oxidation starts earlier at  $E_{\text{onset}}^{\text{ox}} = +0.44 \text{ V}$ .

## References

- <sup>1</sup> L. I. Panferova, V. V. Levin, M. I. Struchkova, A. D. Dilman, *Chem. Commun.* **2019**, 55, 1314-1317.
- <sup>2</sup> M. D. Kosobokov, M. O. Zubkov, V. V. Levin, V. A. Kokorekin, A. D. Dilman, *Chem. Commun.* **2020**, 56, 9453-9456.
- <sup>3</sup> Y. Wang, S. Zhu, *Tetrahedron Lett.* **2001**, 42, 5741-5744.
- <sup>4</sup> E. Voutyritsa, N. F. Nikitas, M. K. Apostopoulou, A. D. Gerogiannopoulou, C. G. Kokotos, *Synthesis* **2018**, 50, 3395-3401.
- <sup>5</sup> O. V. Fedorov, S. I. Scherbinina, V. V. Levin, A. D. Dilman, *J. Org. Chem.* **2019**, 84, 11068-11079.
- <sup>6</sup> V. V. Levin, A. D. Dilman, *Chem. Commun.* **2021**, 57, 749-752.
- <sup>7</sup> A. E. Solinski, A. B. Koval, R. S. Brzozowski, K. R. Morrison, A. J. Fraboni, C. E. Carson, A. R. Eshraghi, G. Zhou, R. G. Quivey, V. A. Voelz, B. A. Buttarro, W. M. Wuest, *J. Am. Chem. Soc.* **2017**, 139, 7188-7191.
- <sup>8</sup> S. K. Ginotra, J. A. Friest, D. B. Berkowitz, *Org. Lett.* **2012**, 14, 968-971.
- <sup>9</sup> B. H. Lipshutz, S. Ghorai, W.W. Y. Leong, *J. Org. Chem.* **2009**, 74, 2854-2857.
- <sup>10</sup> T. Zheng, J. R. Tabor, Z. L. Stein, F. E. Michael, *Org. Lett.* **2018**, 20, 6975-6978.
- <sup>11</sup> M. Yoshida, M. Higuchi, K. Shishido, *Org. Lett.* **2009**, 11, 4752-4755.
- <sup>12</sup> D. He, Y. Guo, Q.-Y. Chen, H. Yang, T. Lv, *J. Fluorine Chem.* **2019**, 222-223, 1-7.
- <sup>13</sup> M. J. Gresser, S. M. Wales, P. A. Keller, *Tetrahedron* **2010**, 66, 6965-6976.
- <sup>14</sup> C. Courtens, M. Risseuw, G. Caljon, L. Maes, A. Martin, S. Van Calenbergh, *Biorg. Med. Chem.* **2019**, 27, 729-747.
- <sup>15</sup> S.J.M. Mdachi, *Bull. Chem. Soc. Ethiop.*, **2012**, 26, 103-113.
- <sup>16</sup> G. A. Edwards, P. A. Culp, J. M. Chalker, *Chem. Commun.* **2015**, 51, 515-518.
- <sup>17</sup> S. Nicolai, S. Erard, D. F. González, J. Waser, *Org. Lett.* **2010**, 12, 384-387.
- <sup>18</sup> C. Chen, T. R. Dugan, W. W. Brennessel, D. J. Weix., P. L. Holland, *J. Am. Chem. Soc.* **2014**, 136, 945-955.
- <sup>19</sup> F. Ratsch, H.-G. Schmalz, *Synlett* **2018**, 29, 785-792.
- <sup>20</sup> J. M. Burns, E. H. Krenske, R. P. McGeary, *Eur. J. Org. Chem.* **2017**, 252-256.
- <sup>21</sup> D. Francová, G. Kickelbick, *Monatsh. Chem.* **2009**, 140, 413.
- <sup>22</sup> E. G. Mamedov, T. G. Kyazimova, Z. M. Nagiev, *Russ. J. Org. Chem.* **2009**, 45, 74-77.
- <sup>23</sup> Y. Hayashi, H. Gotoh, T. Tamura, H. Yamaguchi, R. Masui, M. Shoji, *J. Am. Chem. Soc.* **2005**, 127, 16028-16029.
- <sup>24</sup> C. A. Citadelle, E. L. Nouy, F. Bisaro, A. M. Z. Slawin, C. S. J. Cazin, *Dalton Trans.* **2010**, 39, 4489-4491.
- <sup>25</sup> J. J. Douglas, H. Albright, M. J. Sevrin, K. P. Cole, C. R. J. Stephenson, *Angew. Chem. Int. Ed.* **2015**, 54, 14898-14902.
- <sup>26</sup> Y.-L. Xiao, Q.-Q. Min, C. Xu, R.-W. Wang, X. Zhang, *Angew. Chem. Int. Ed.* **2016**, 55, 5837-5841.
- <sup>27</sup> M. A. Cismesia, T. P. Yoon, *Chem. Sci.* **2015**, 6, 5426-5434.

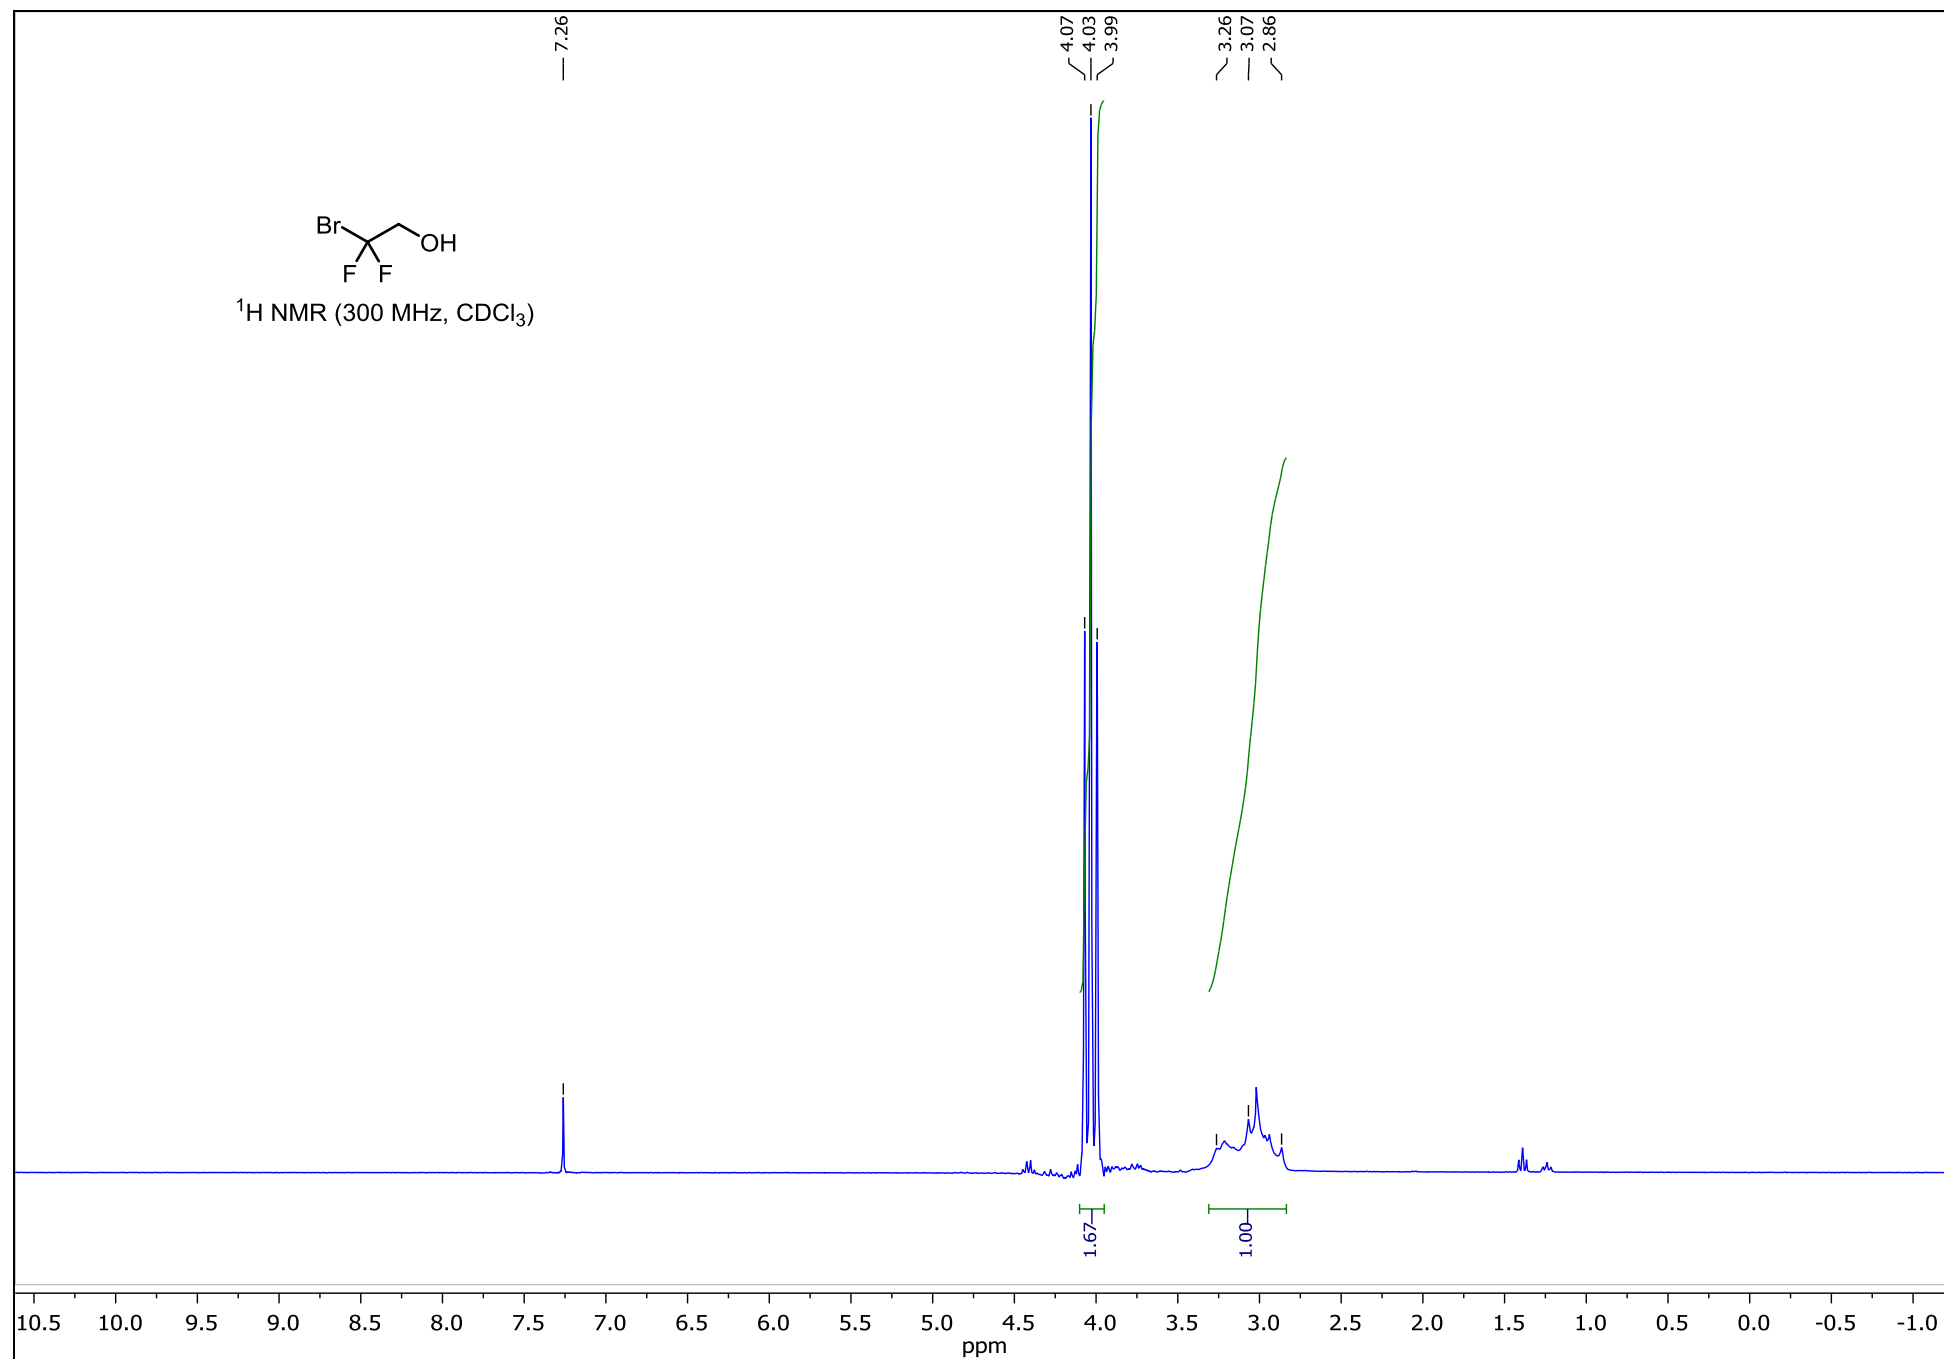

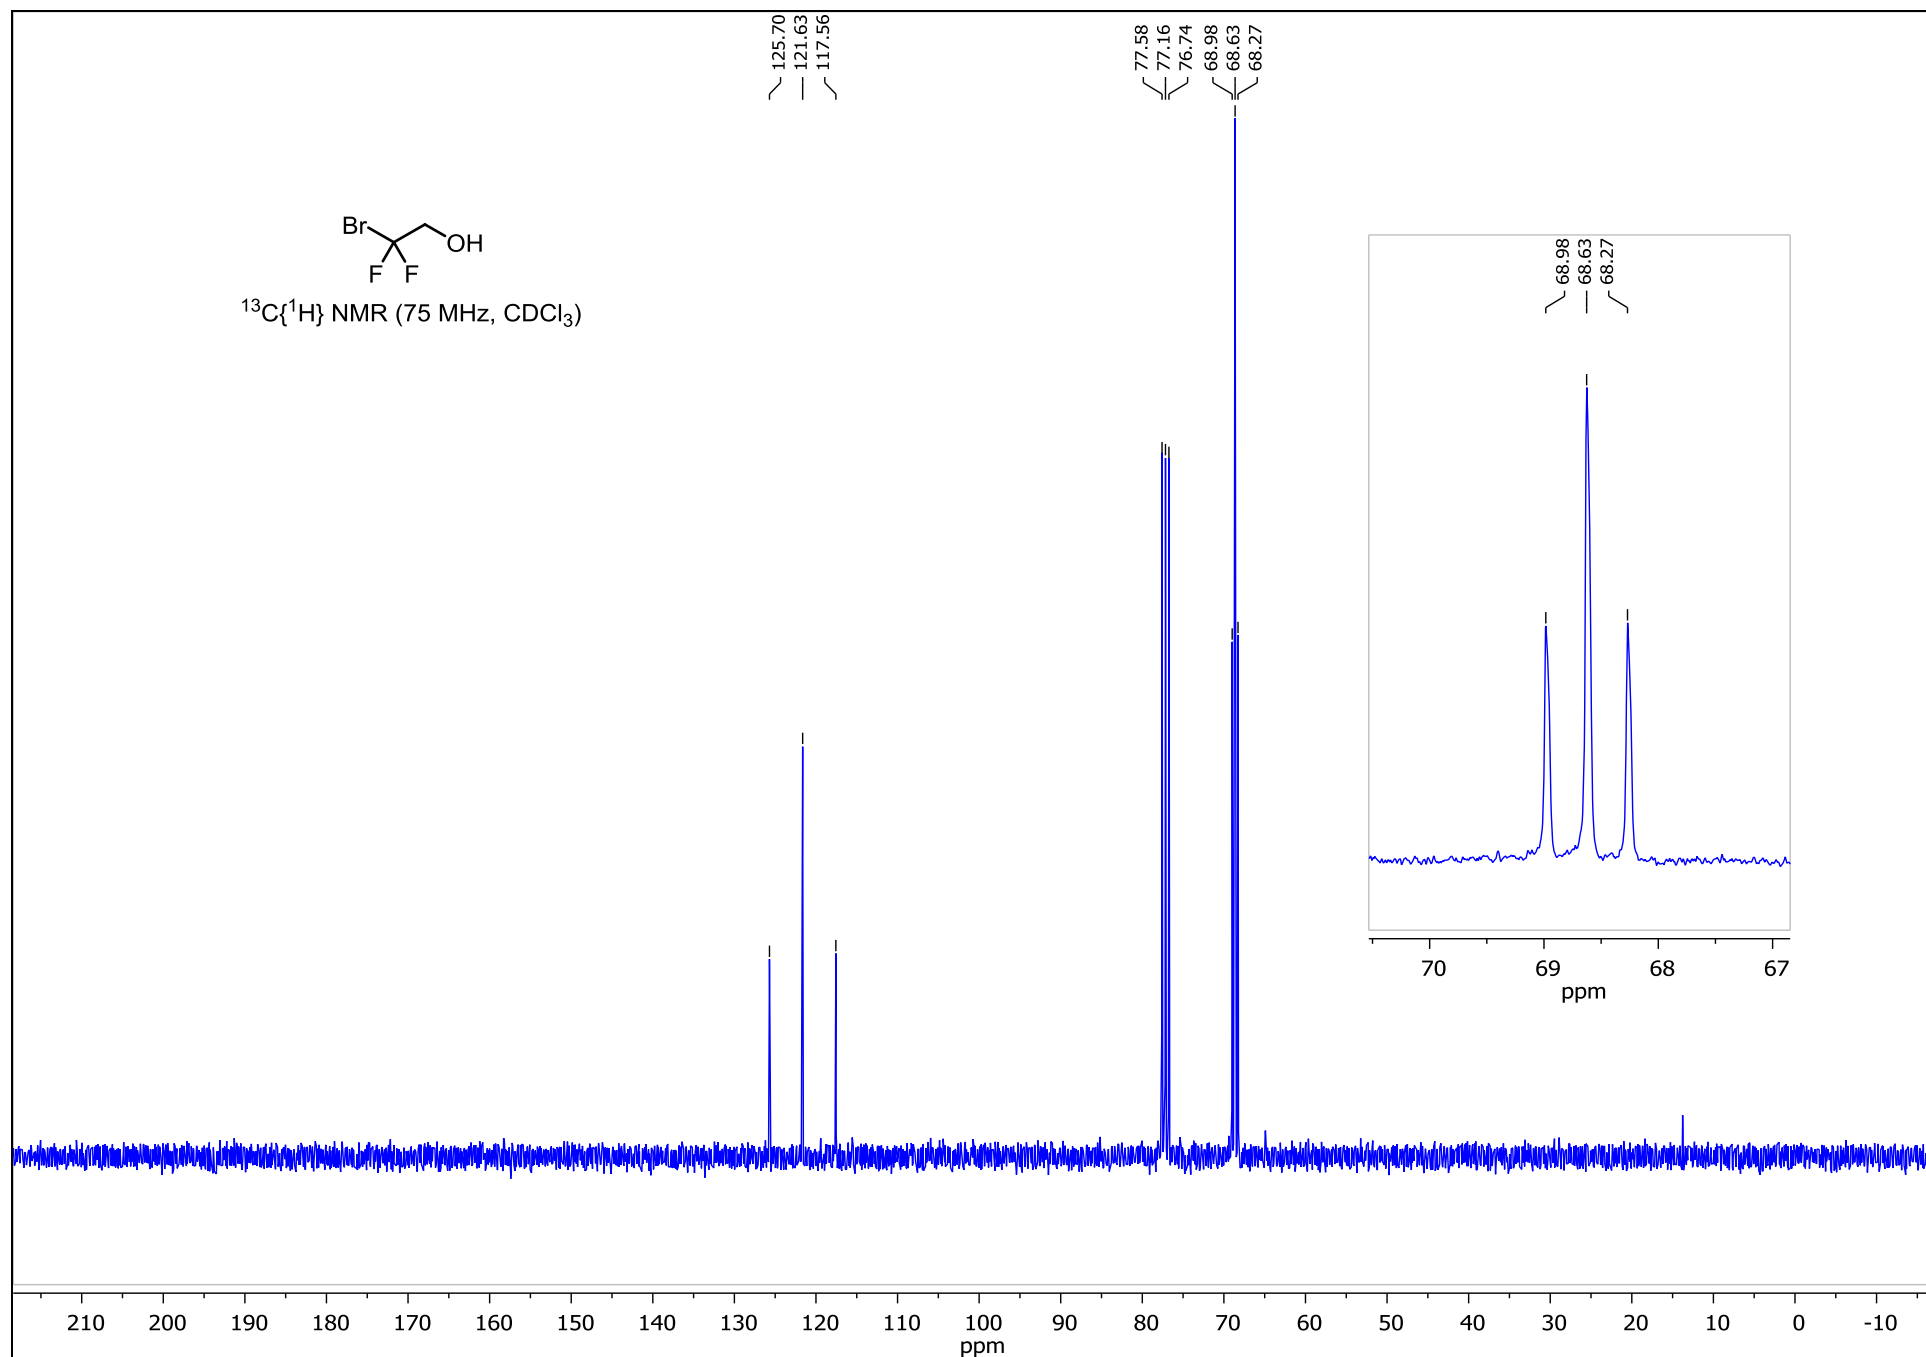

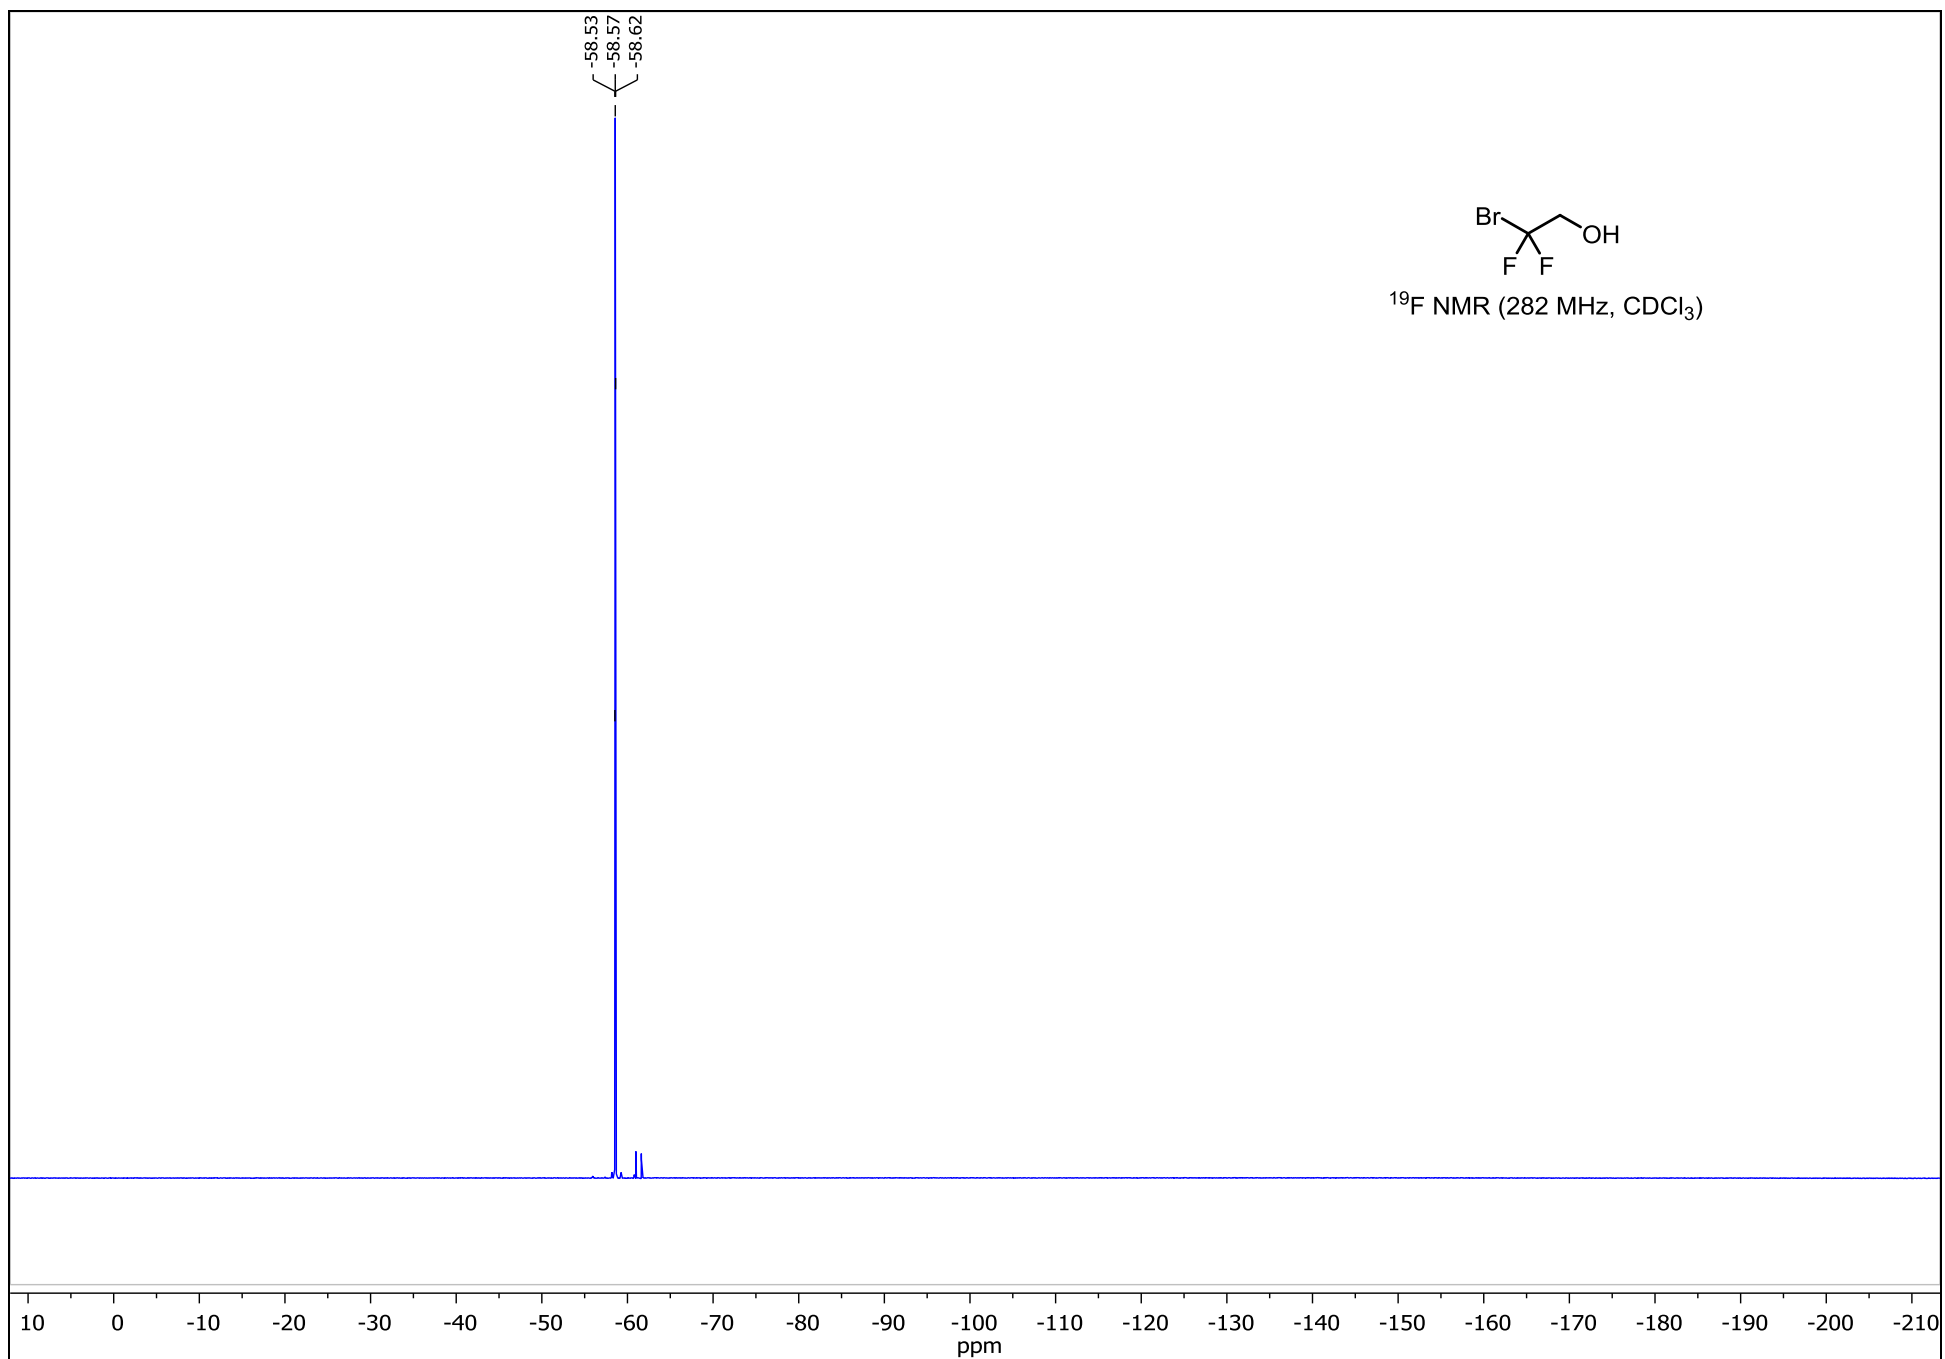

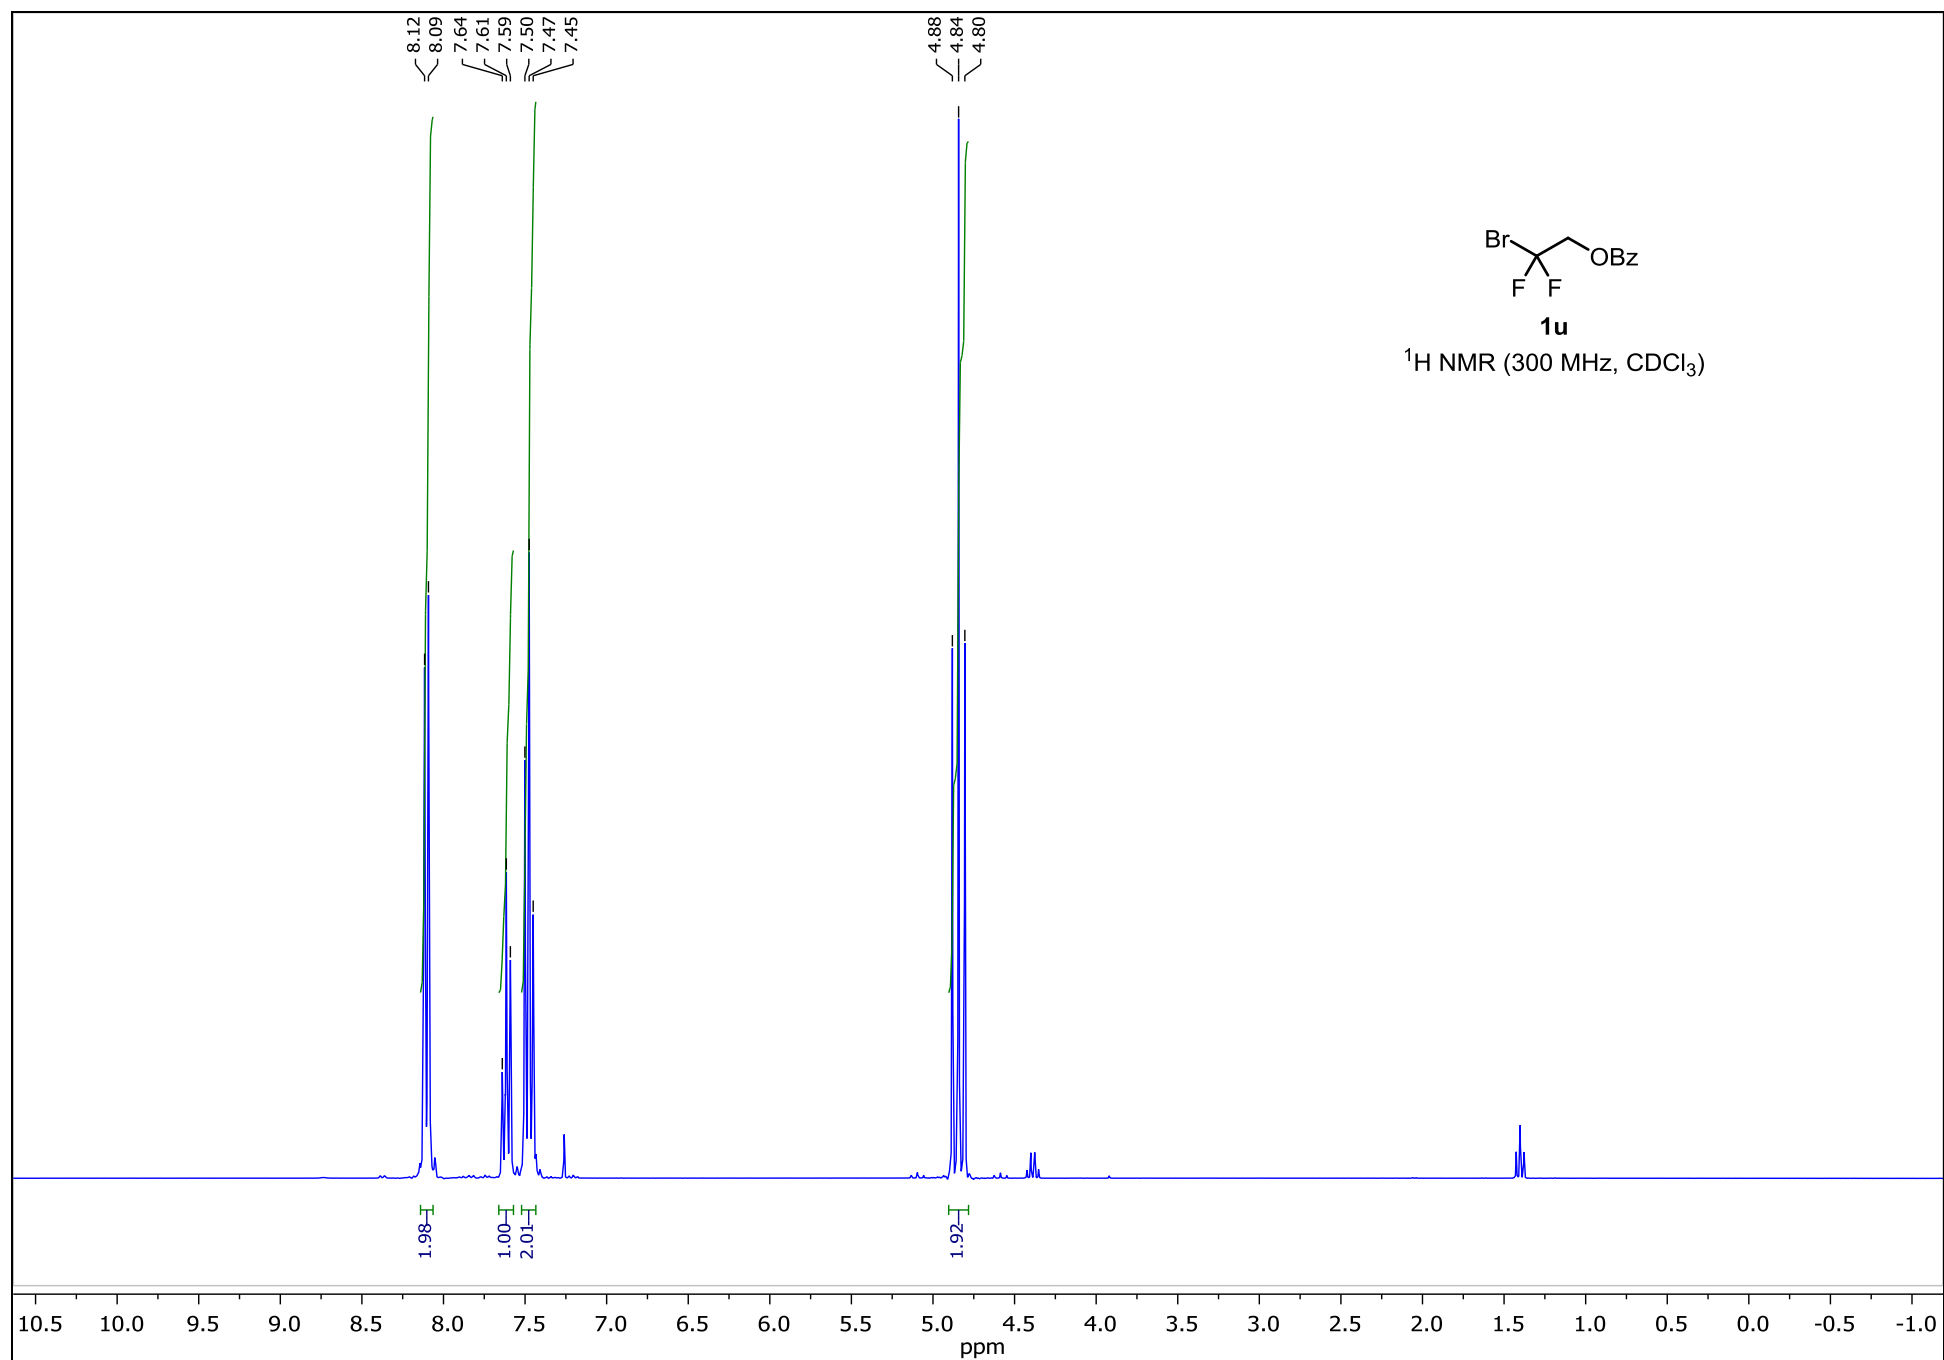



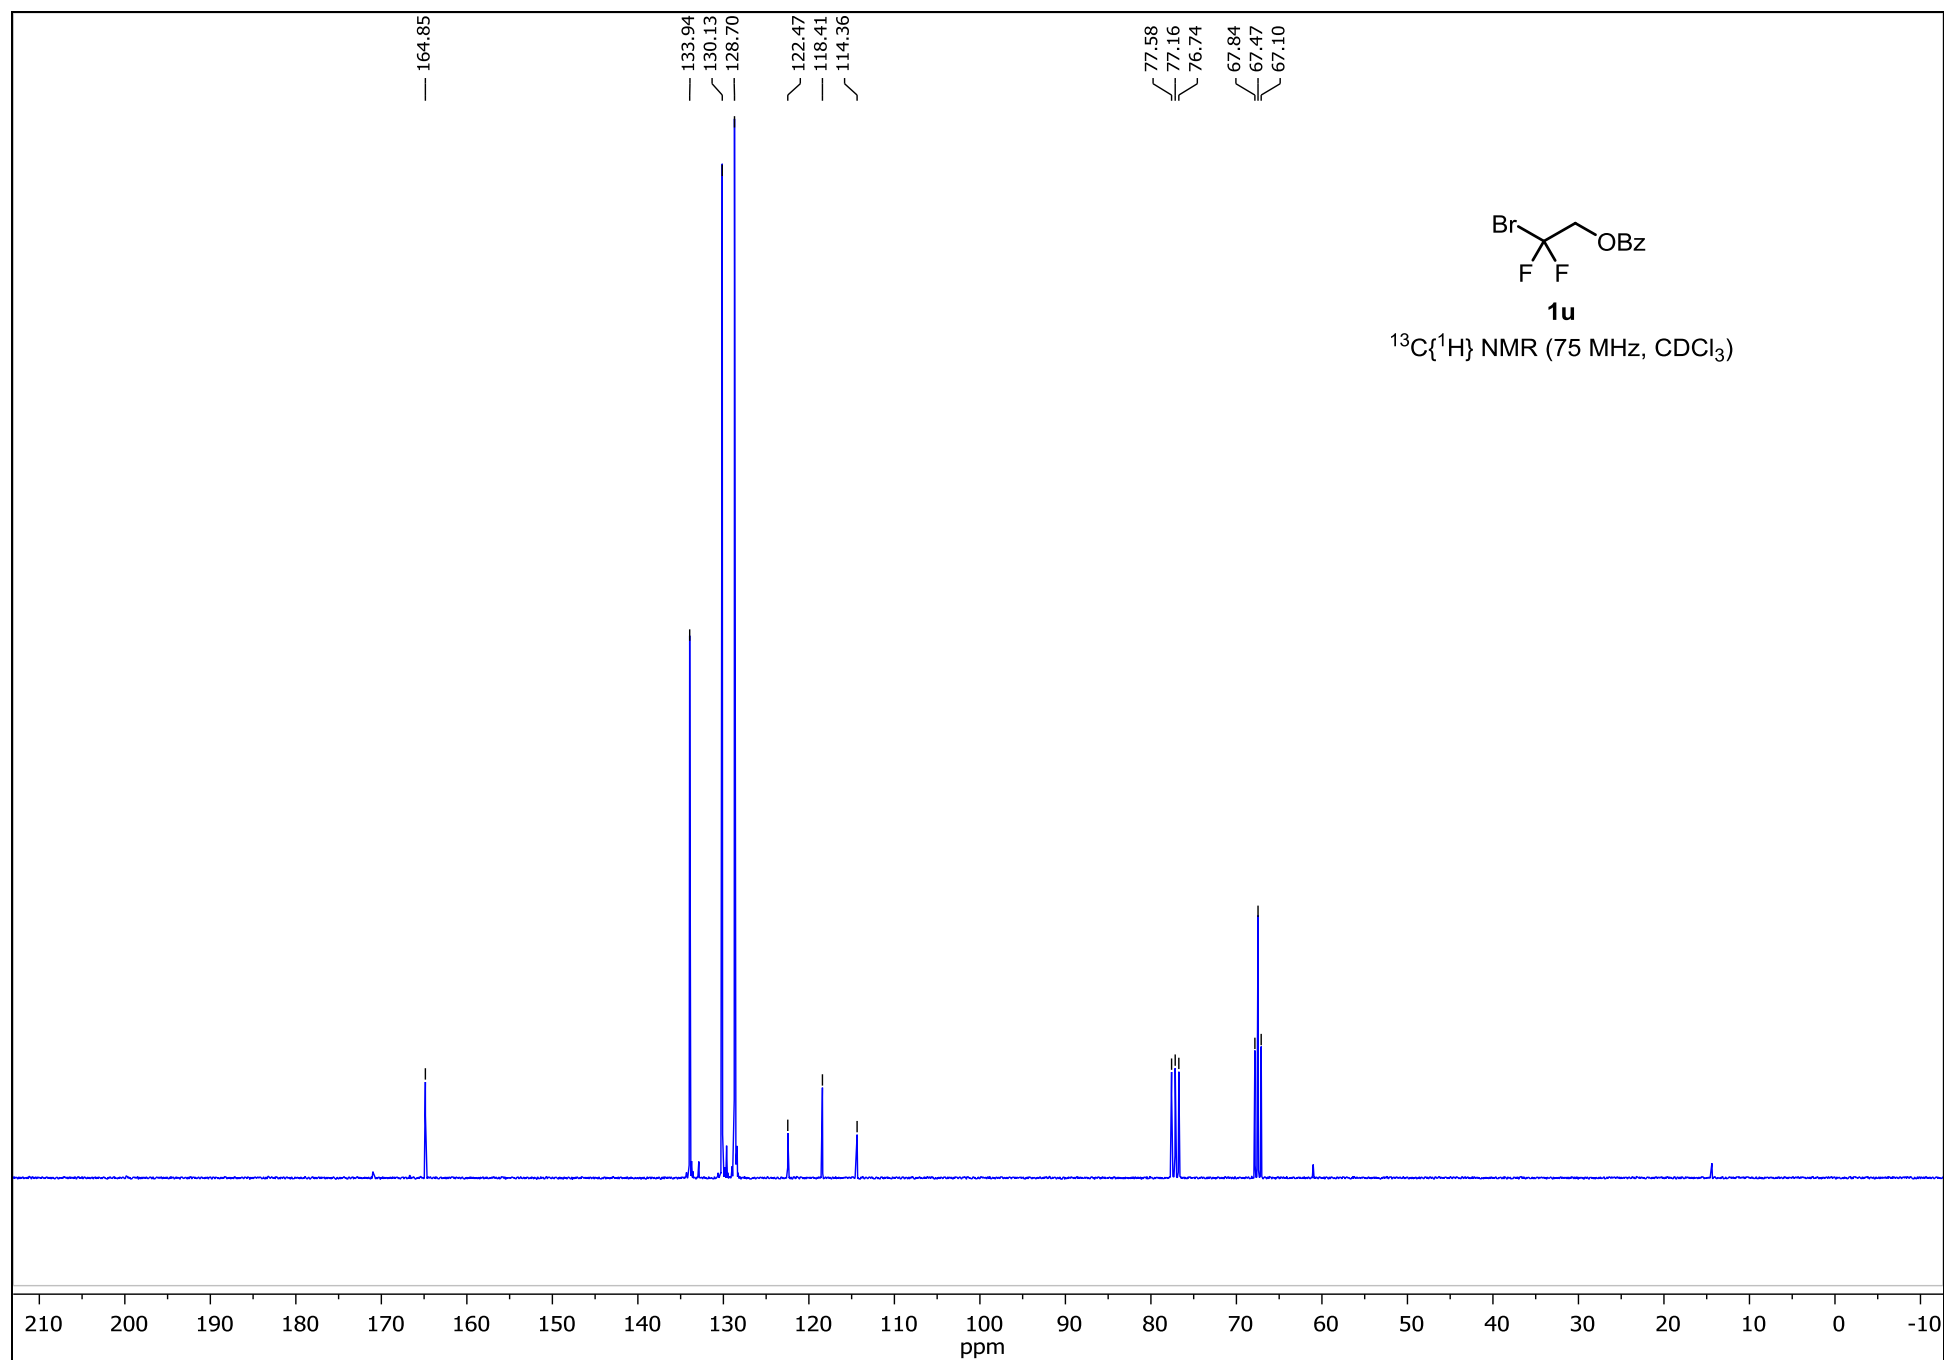

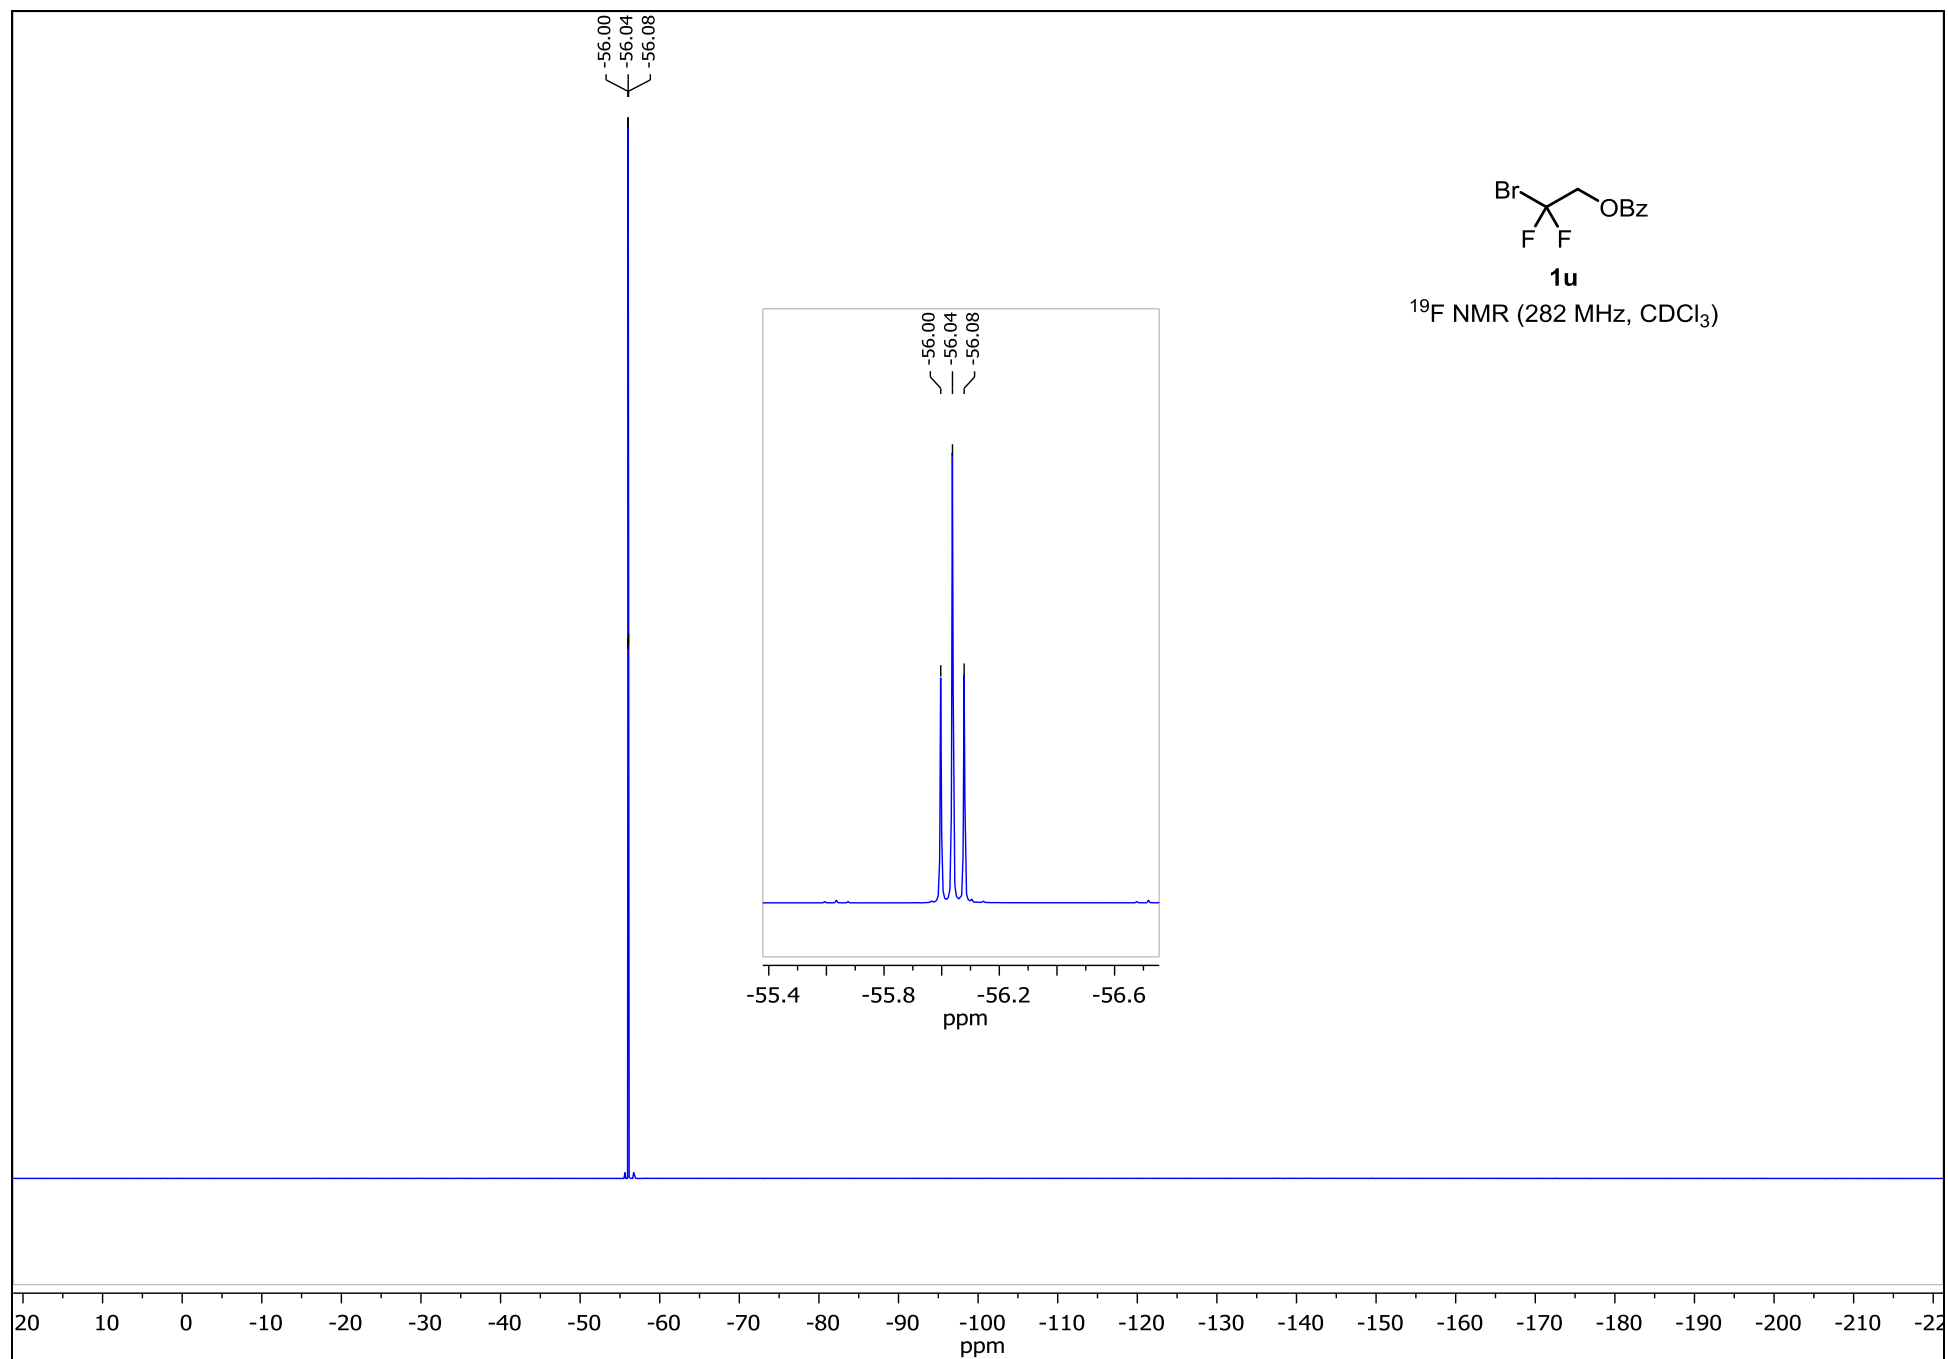

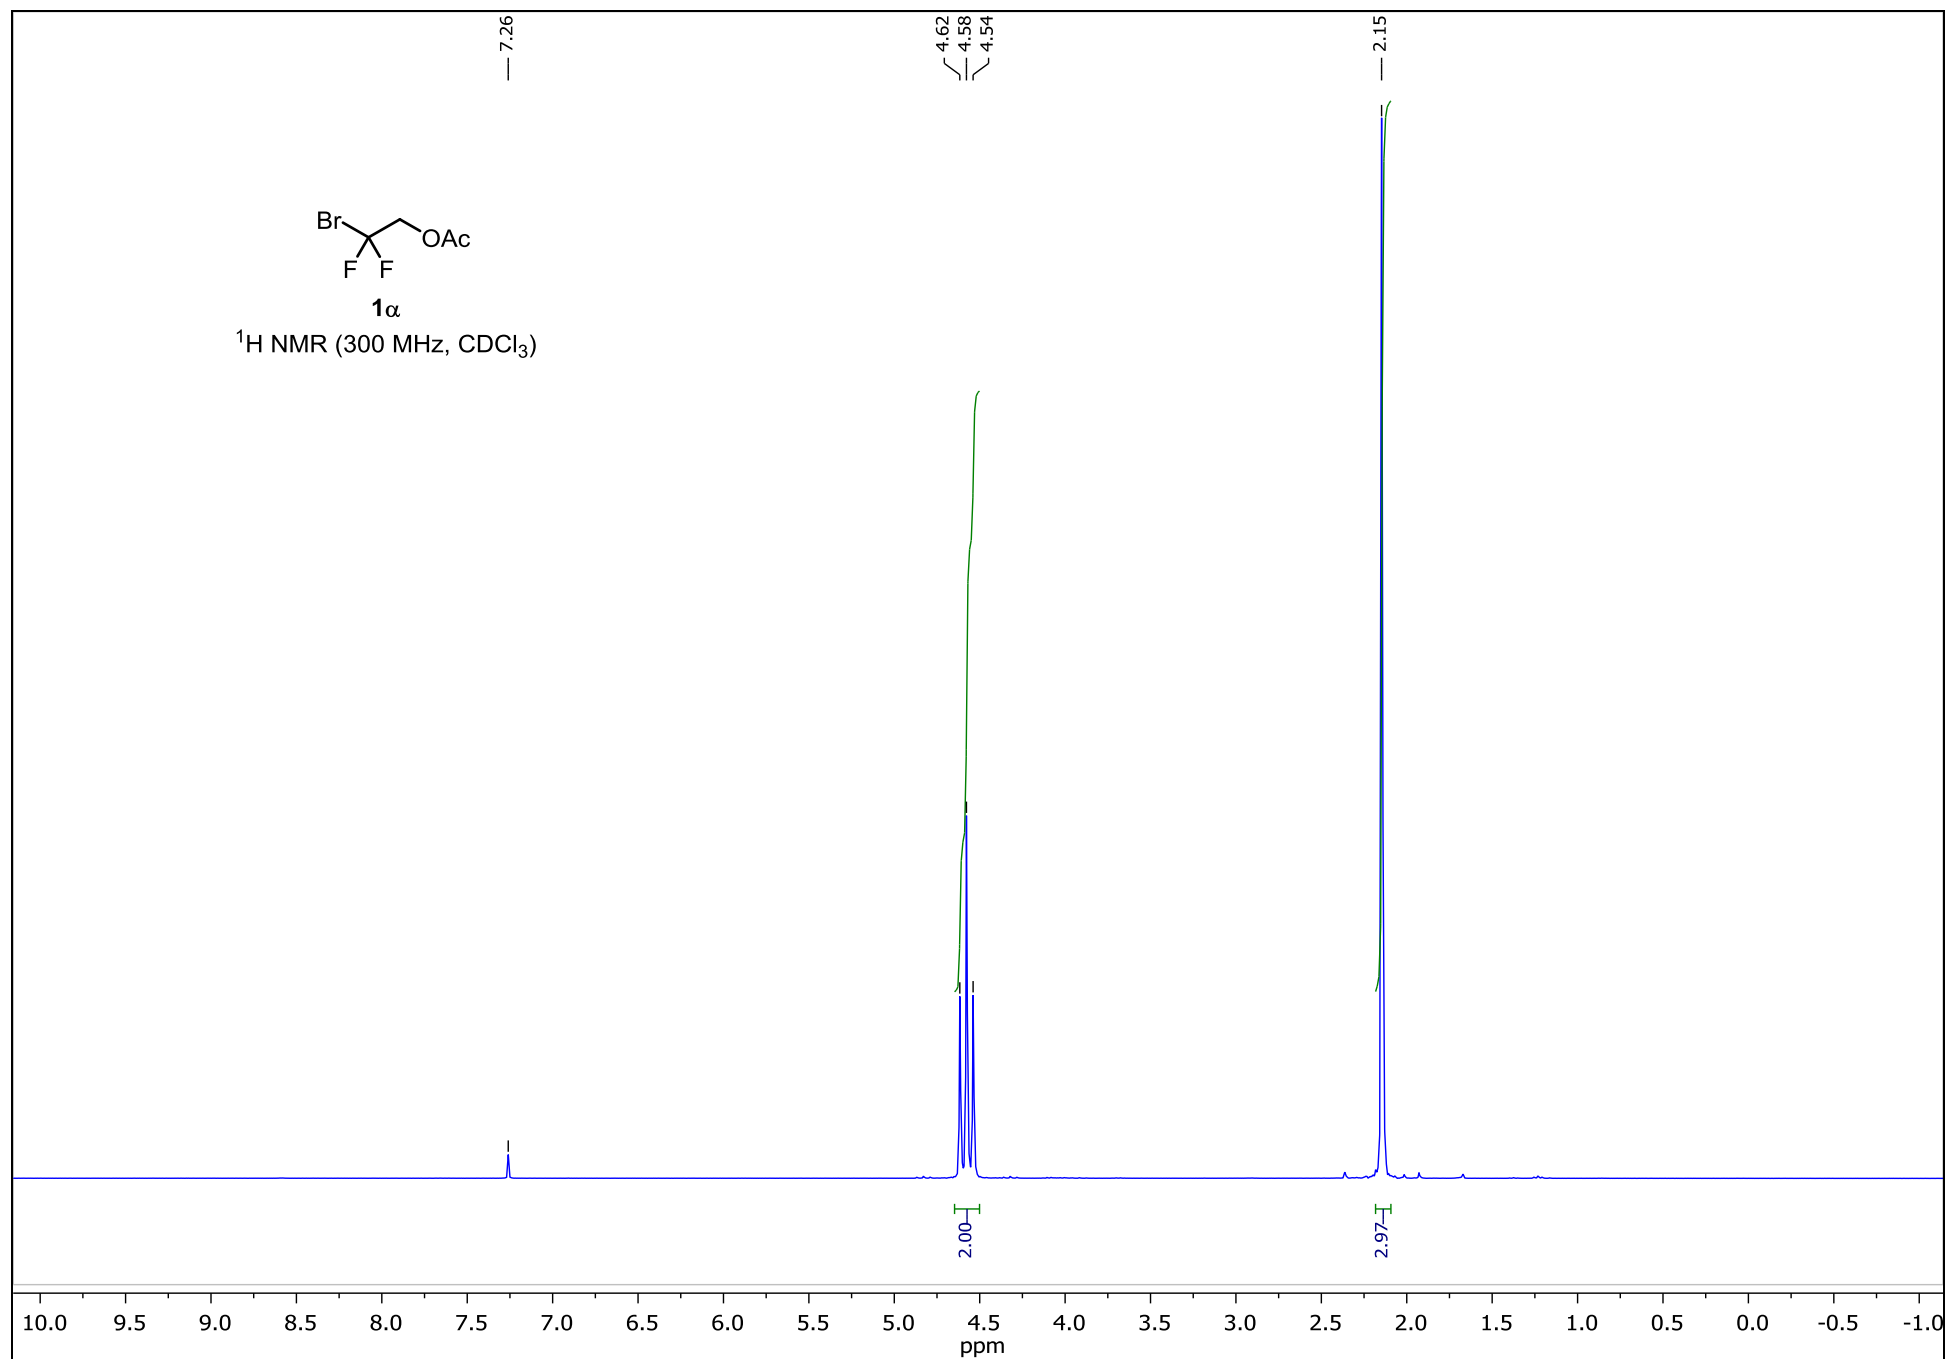

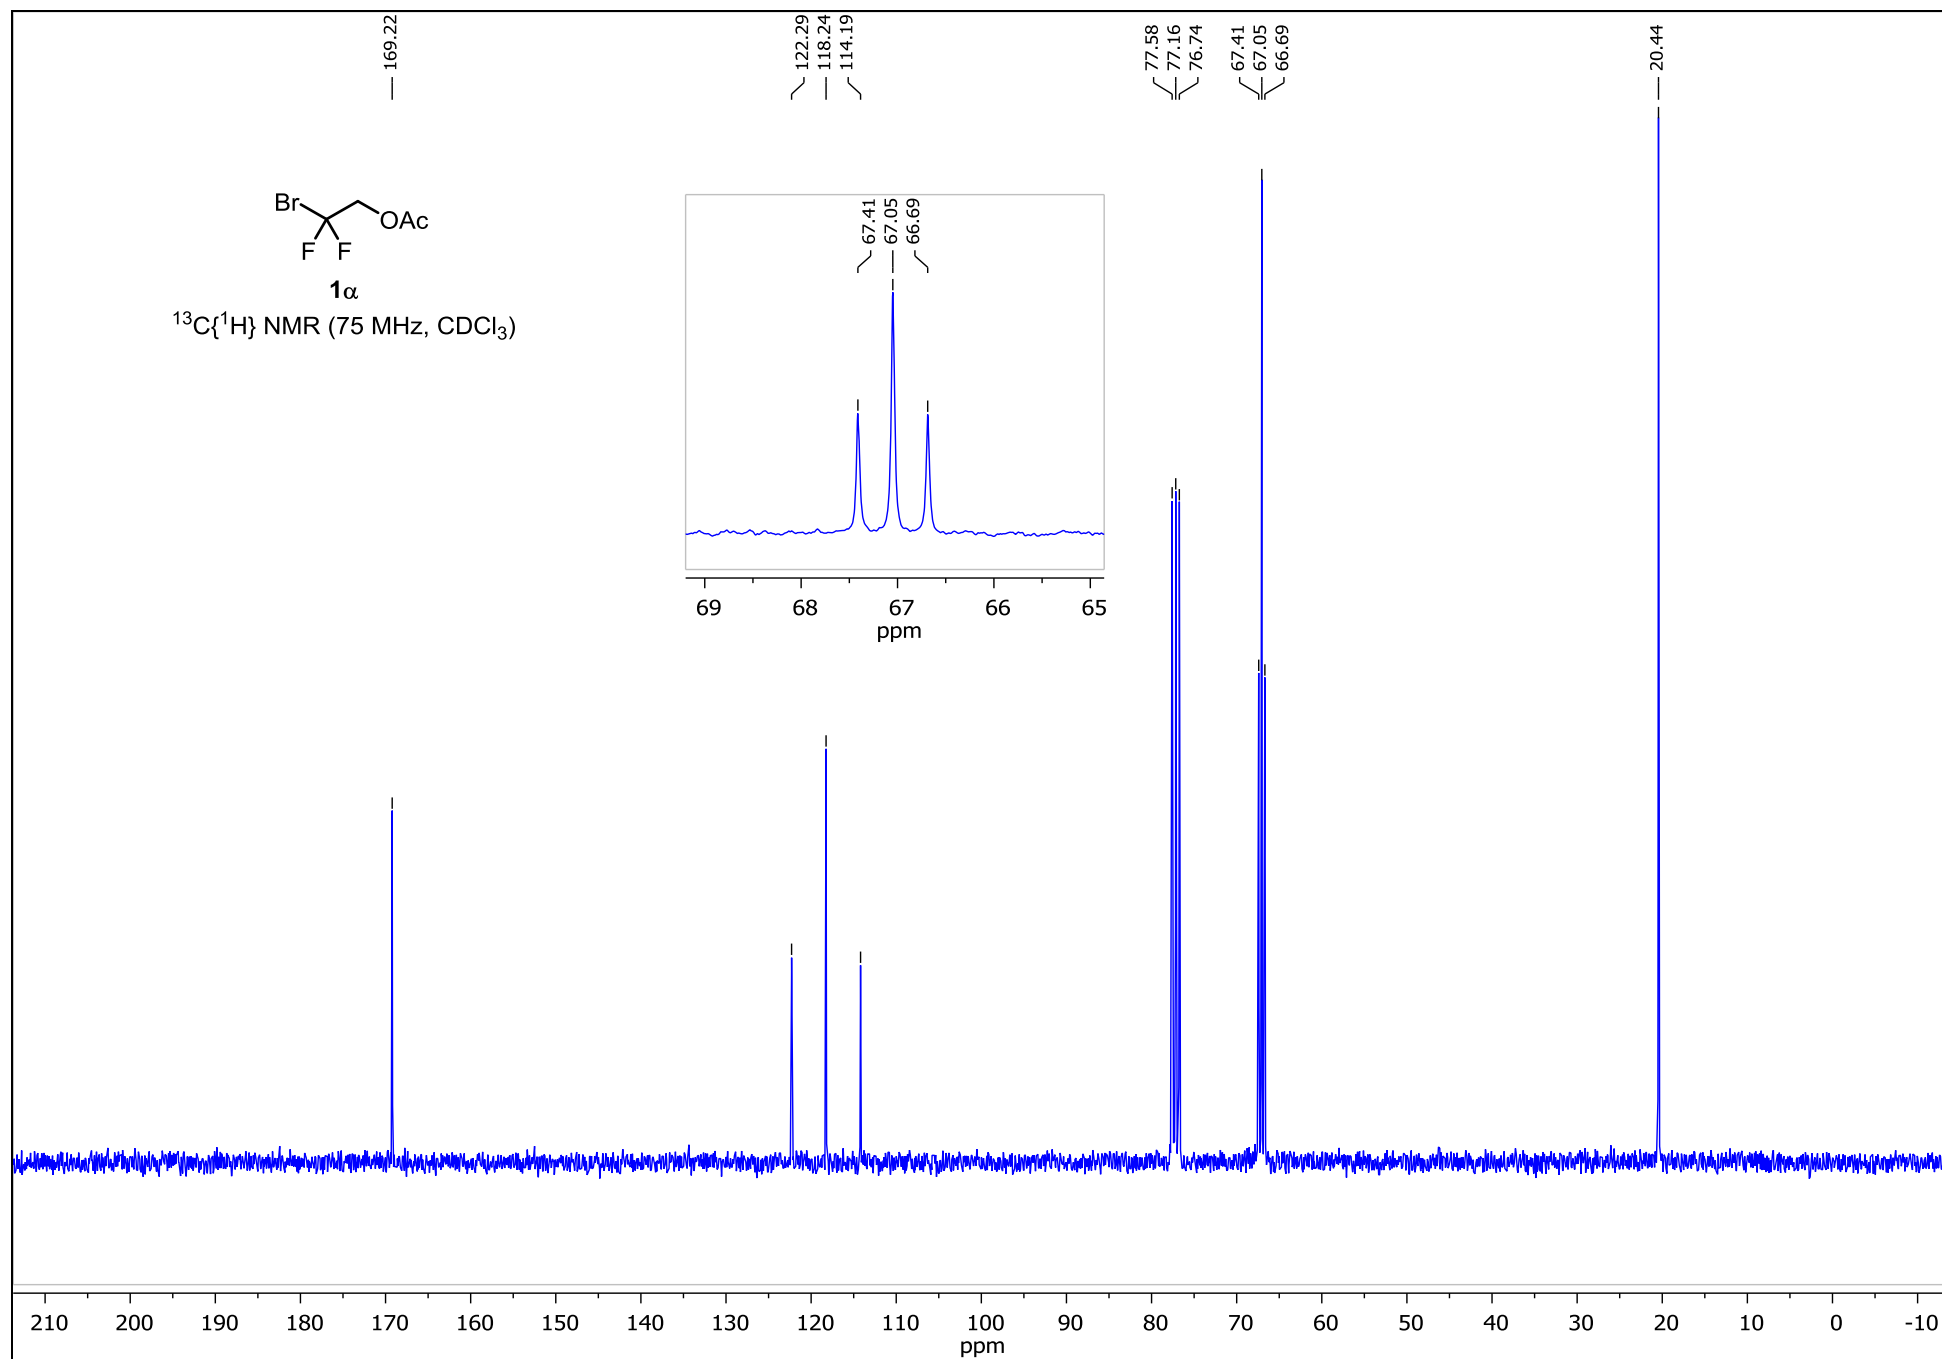

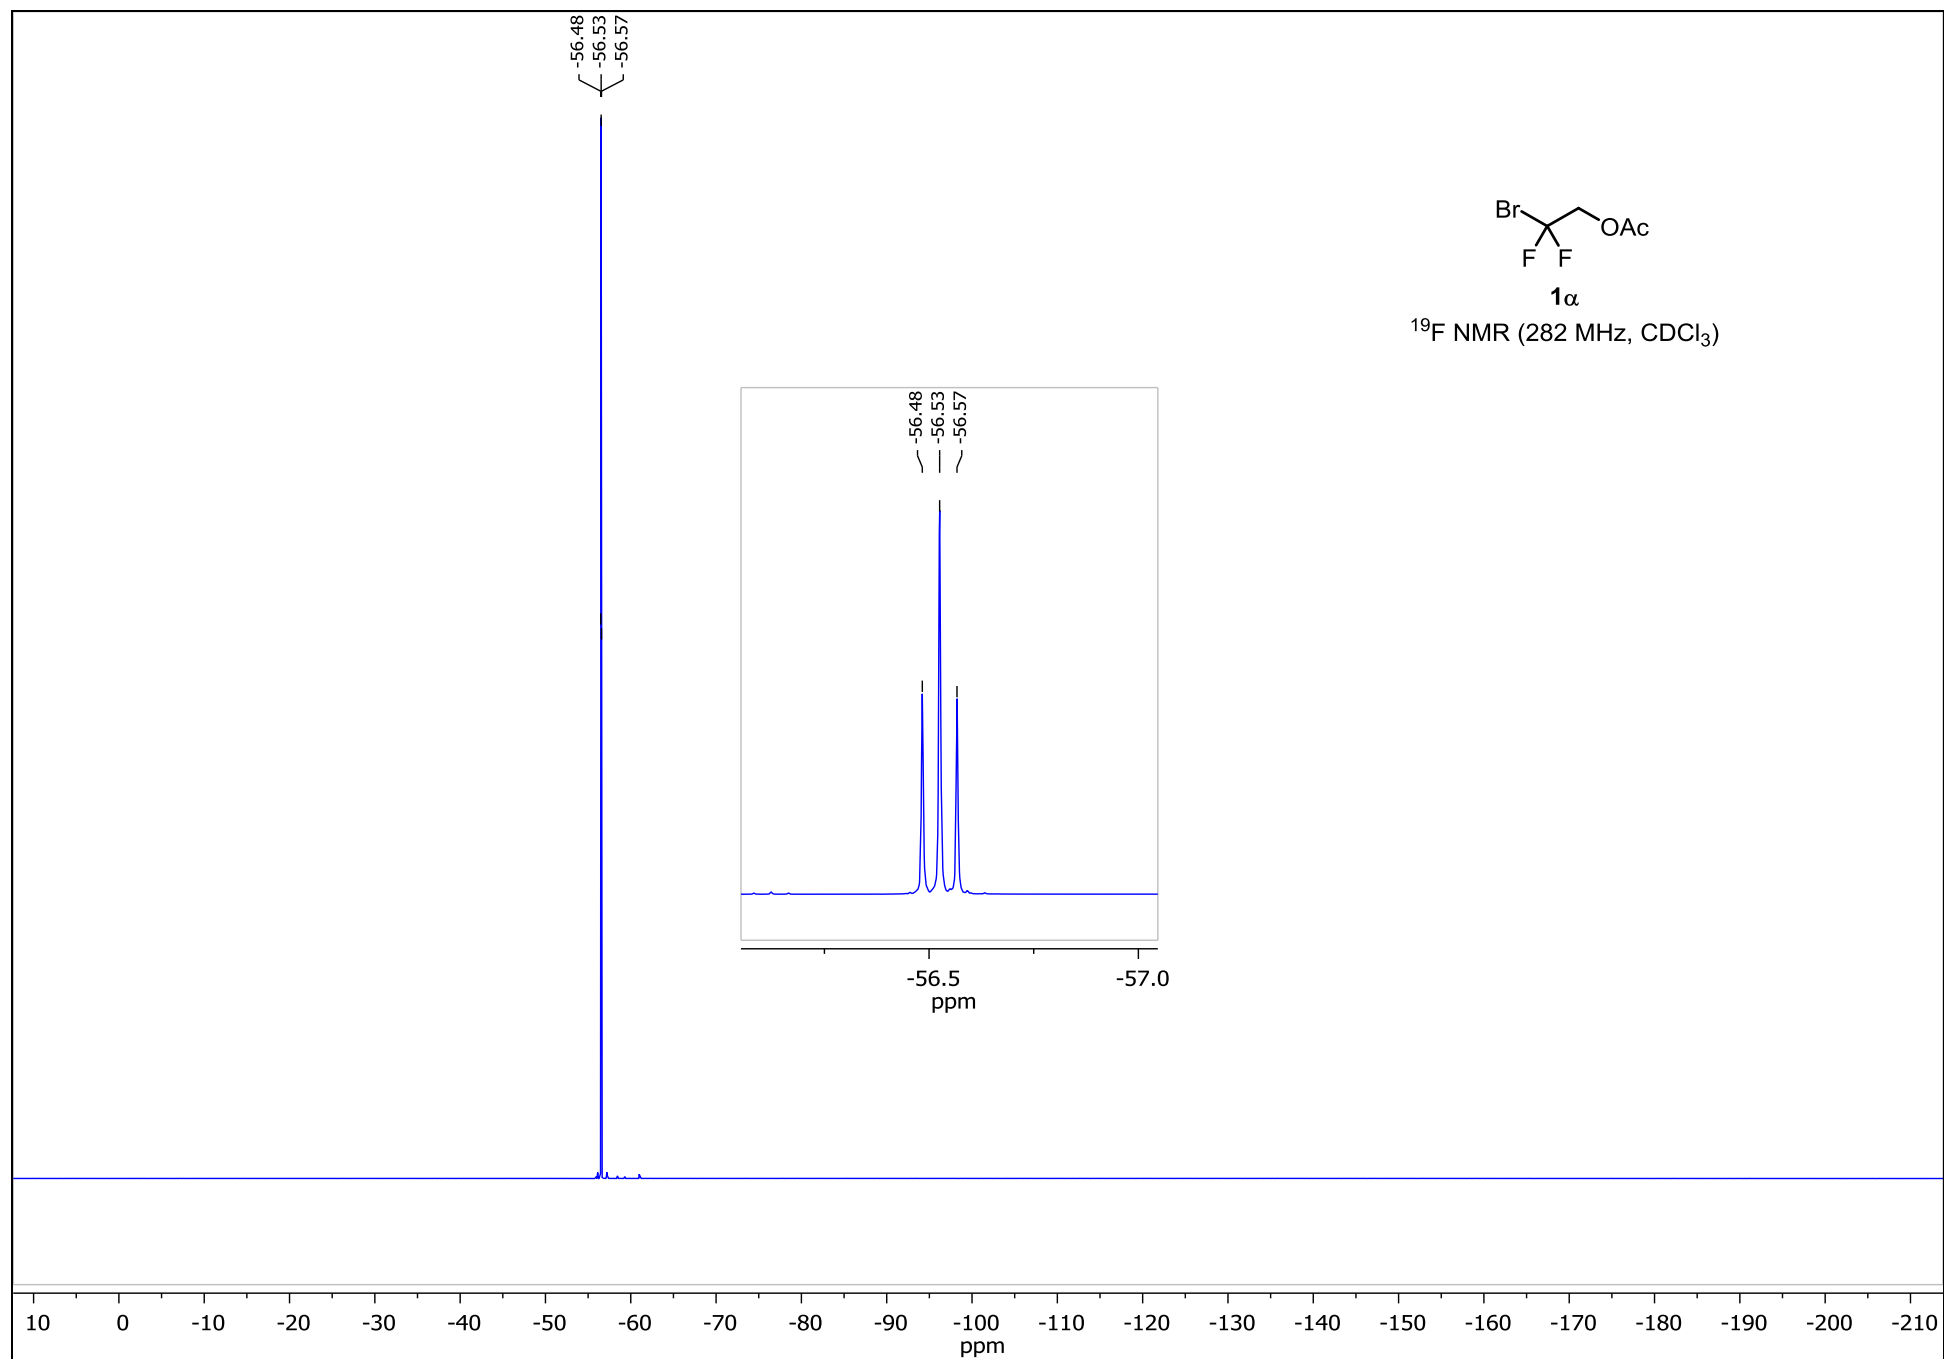

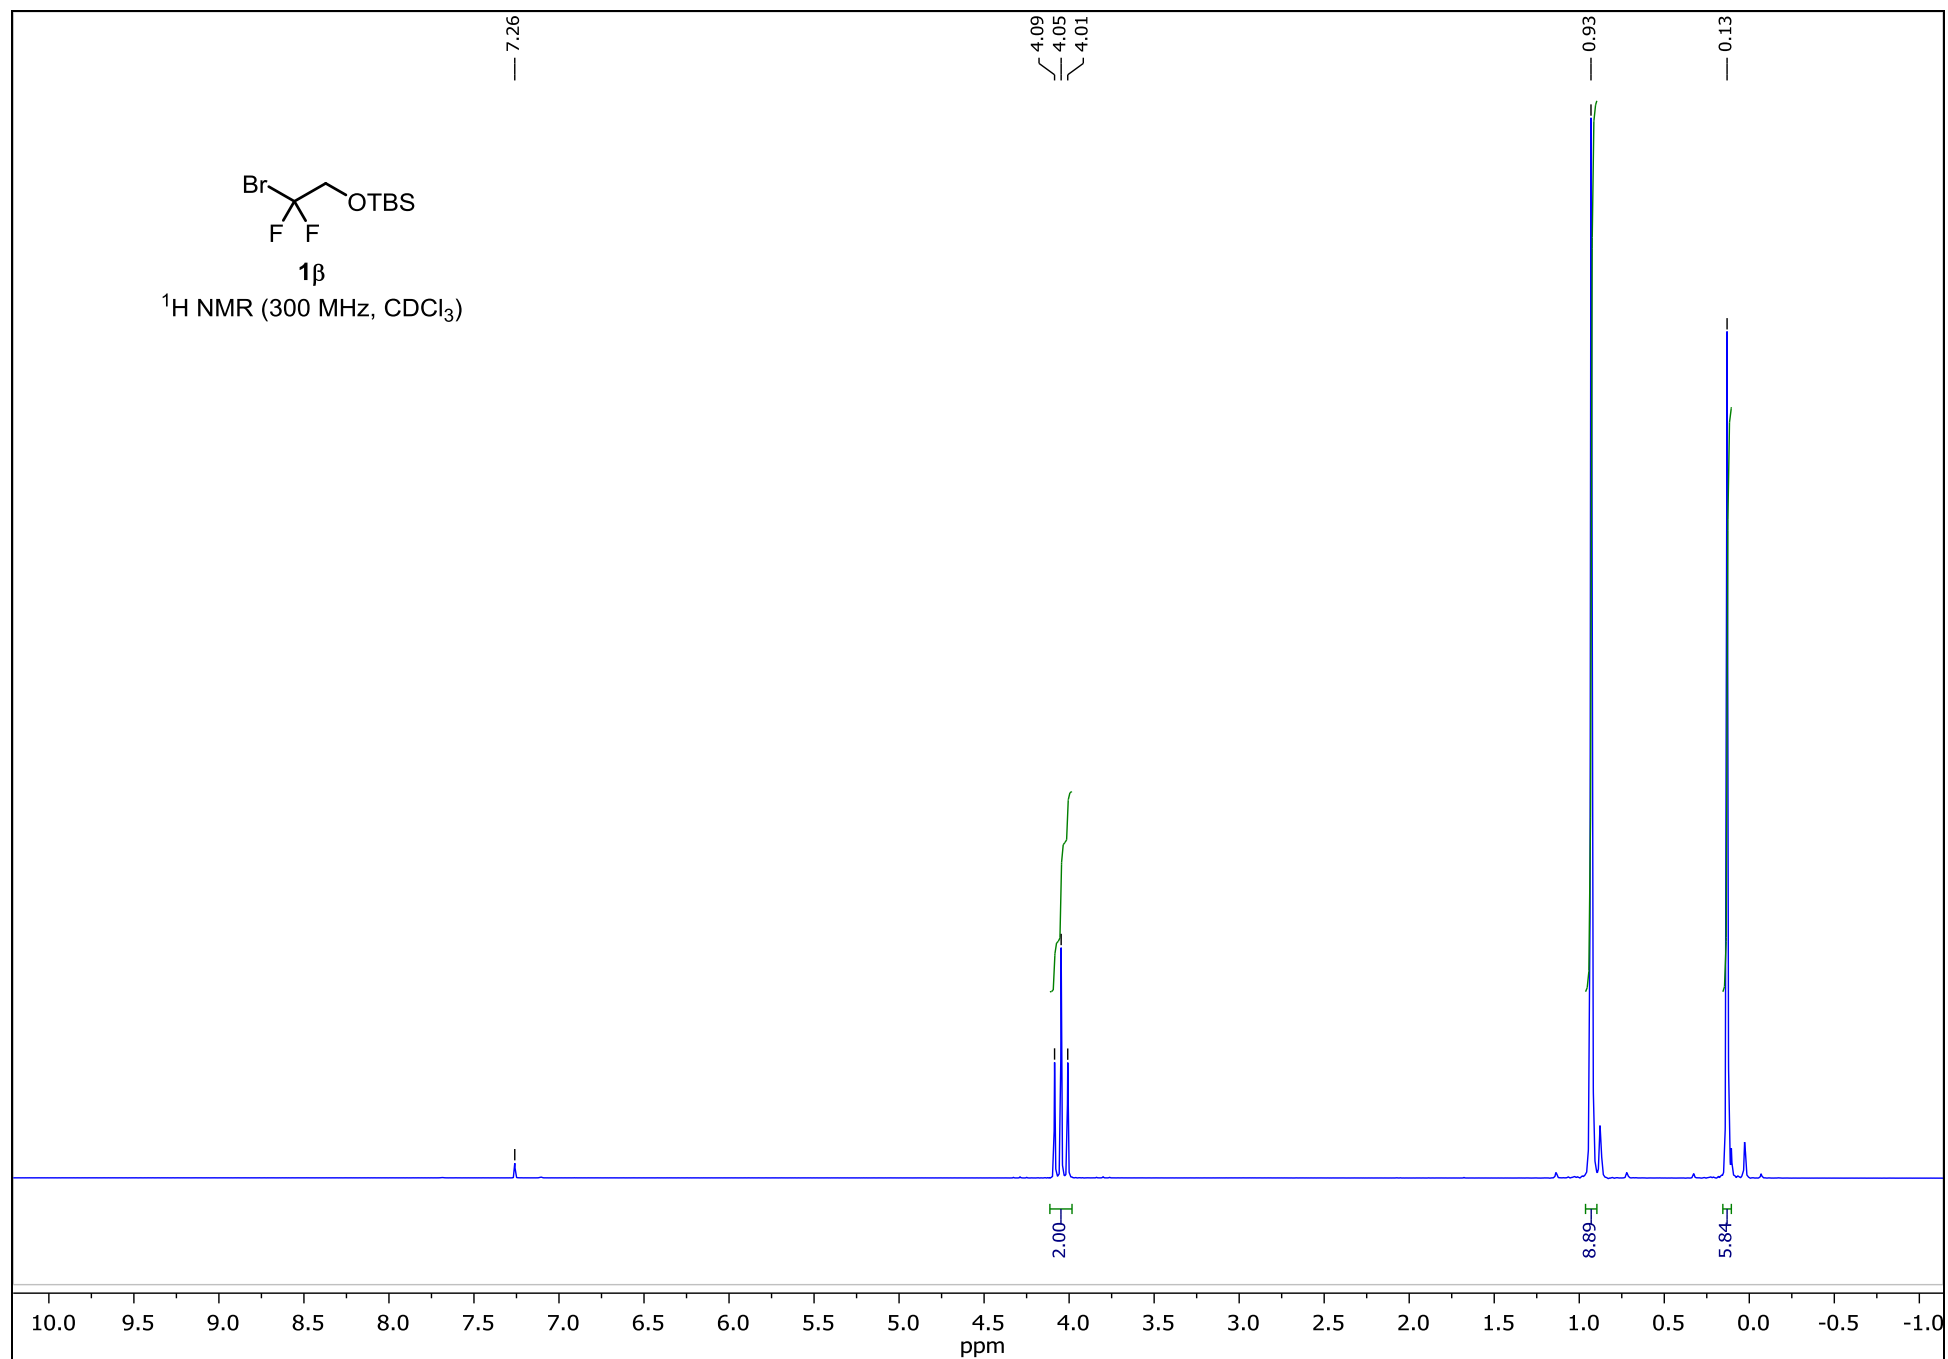

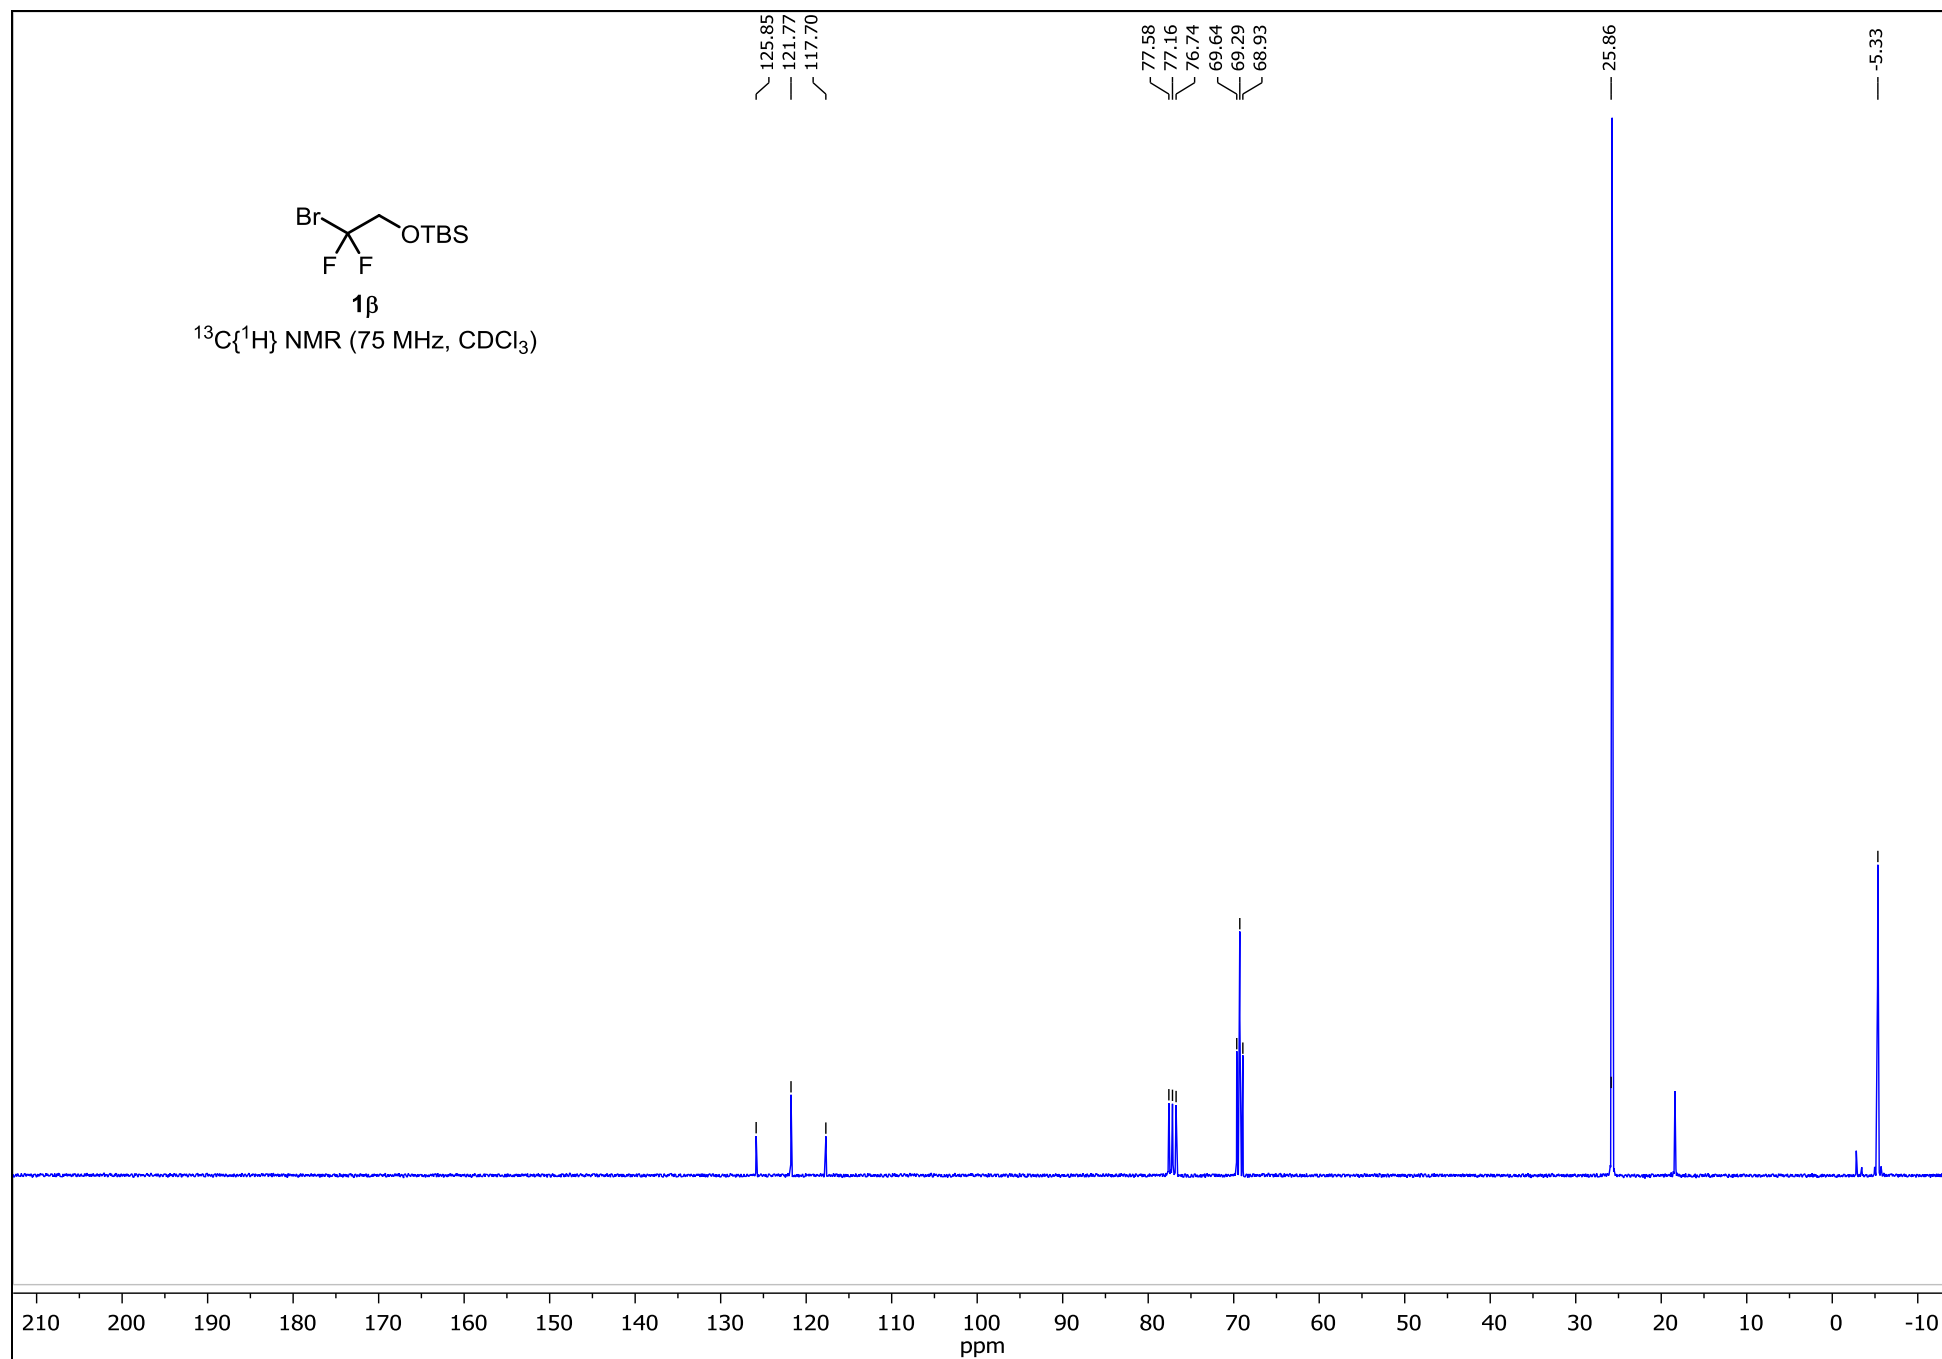

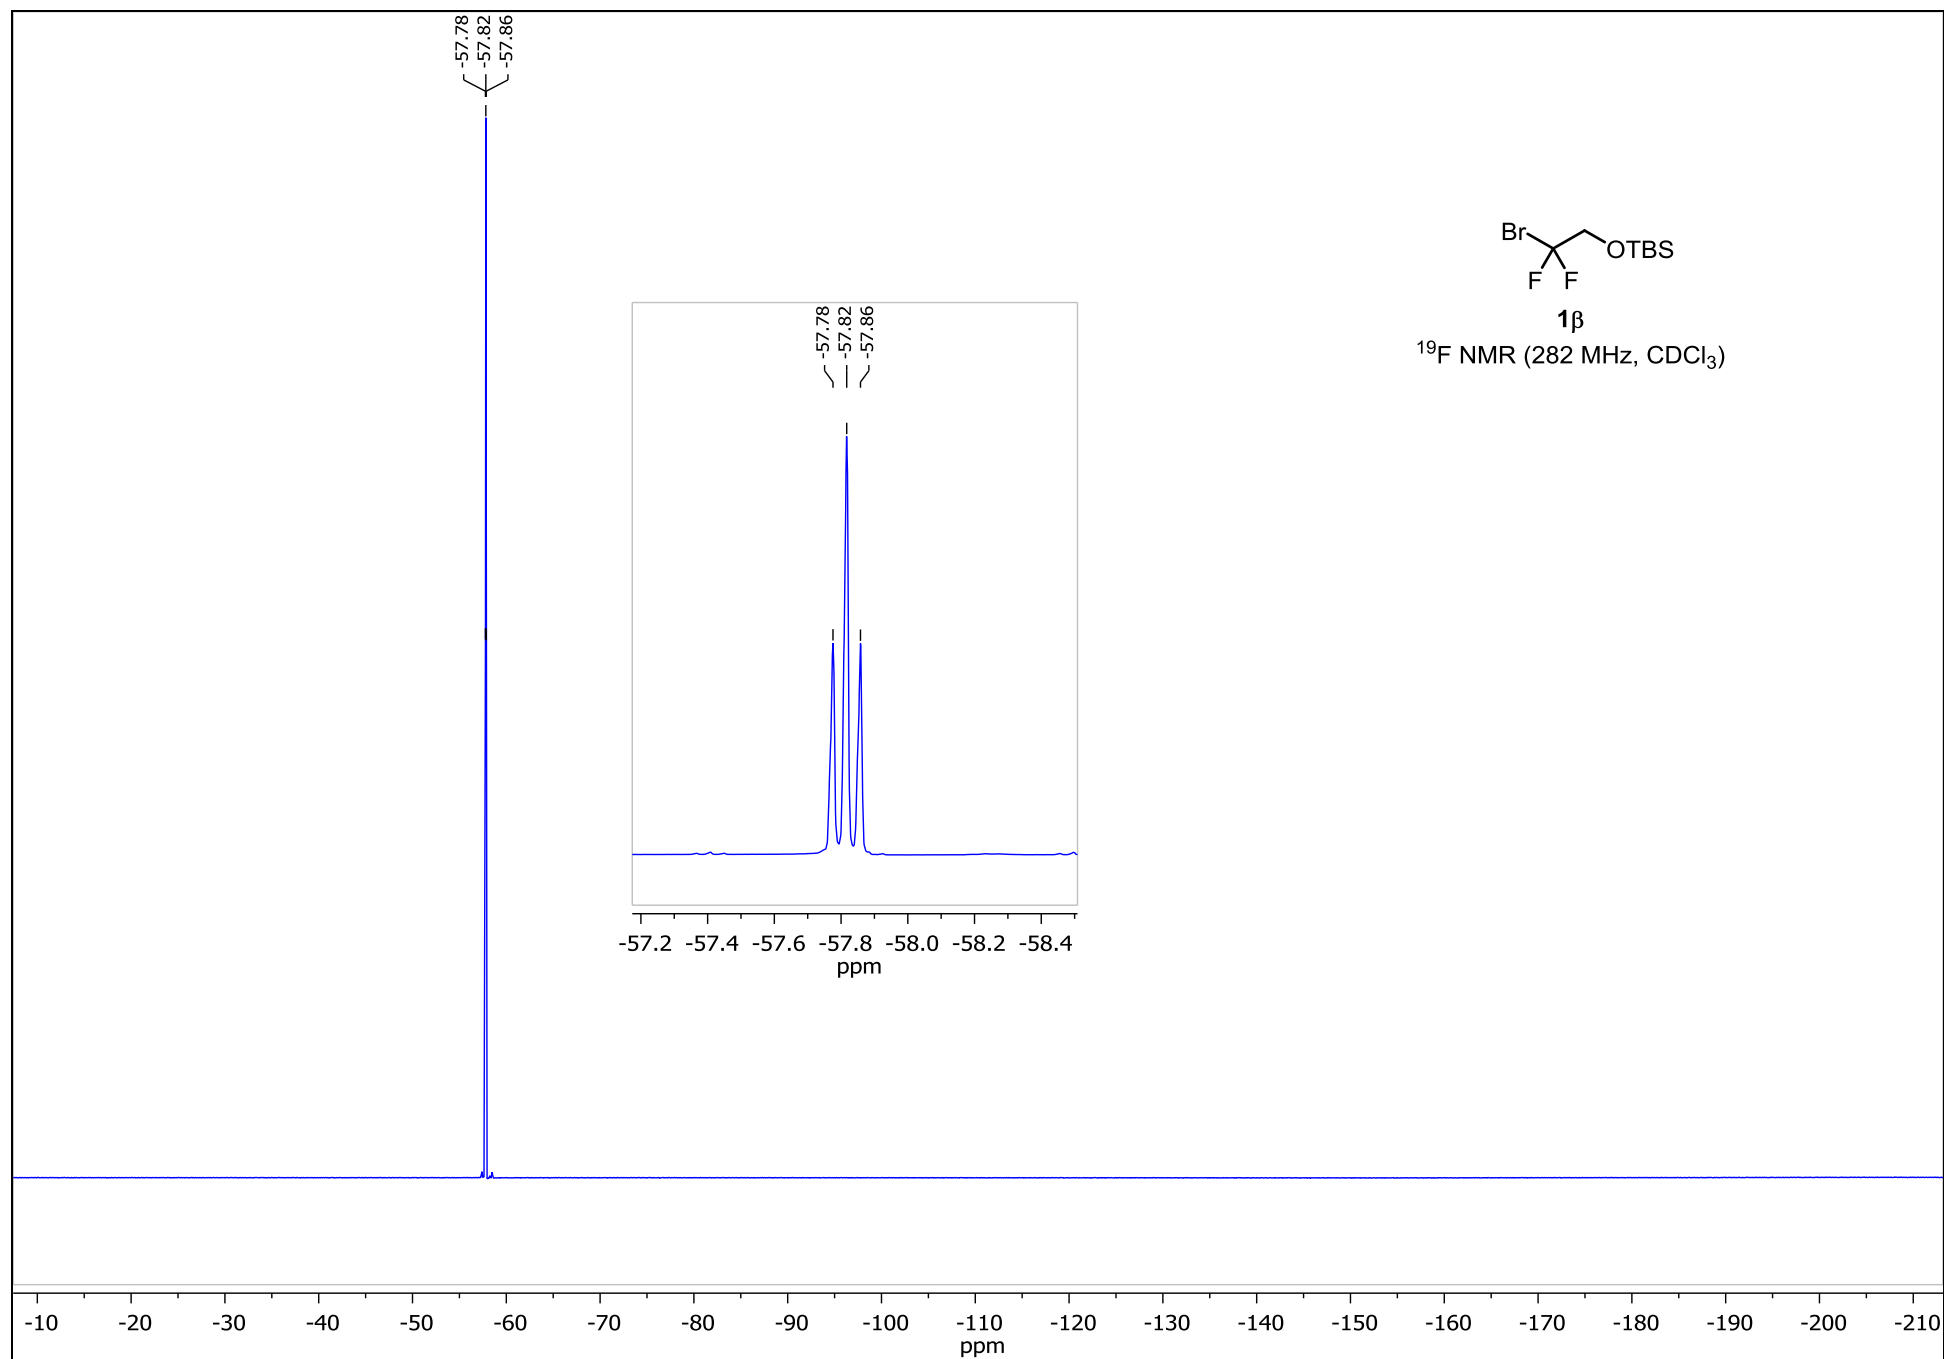



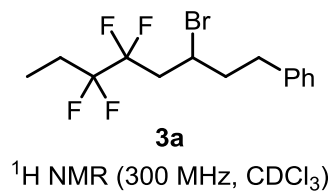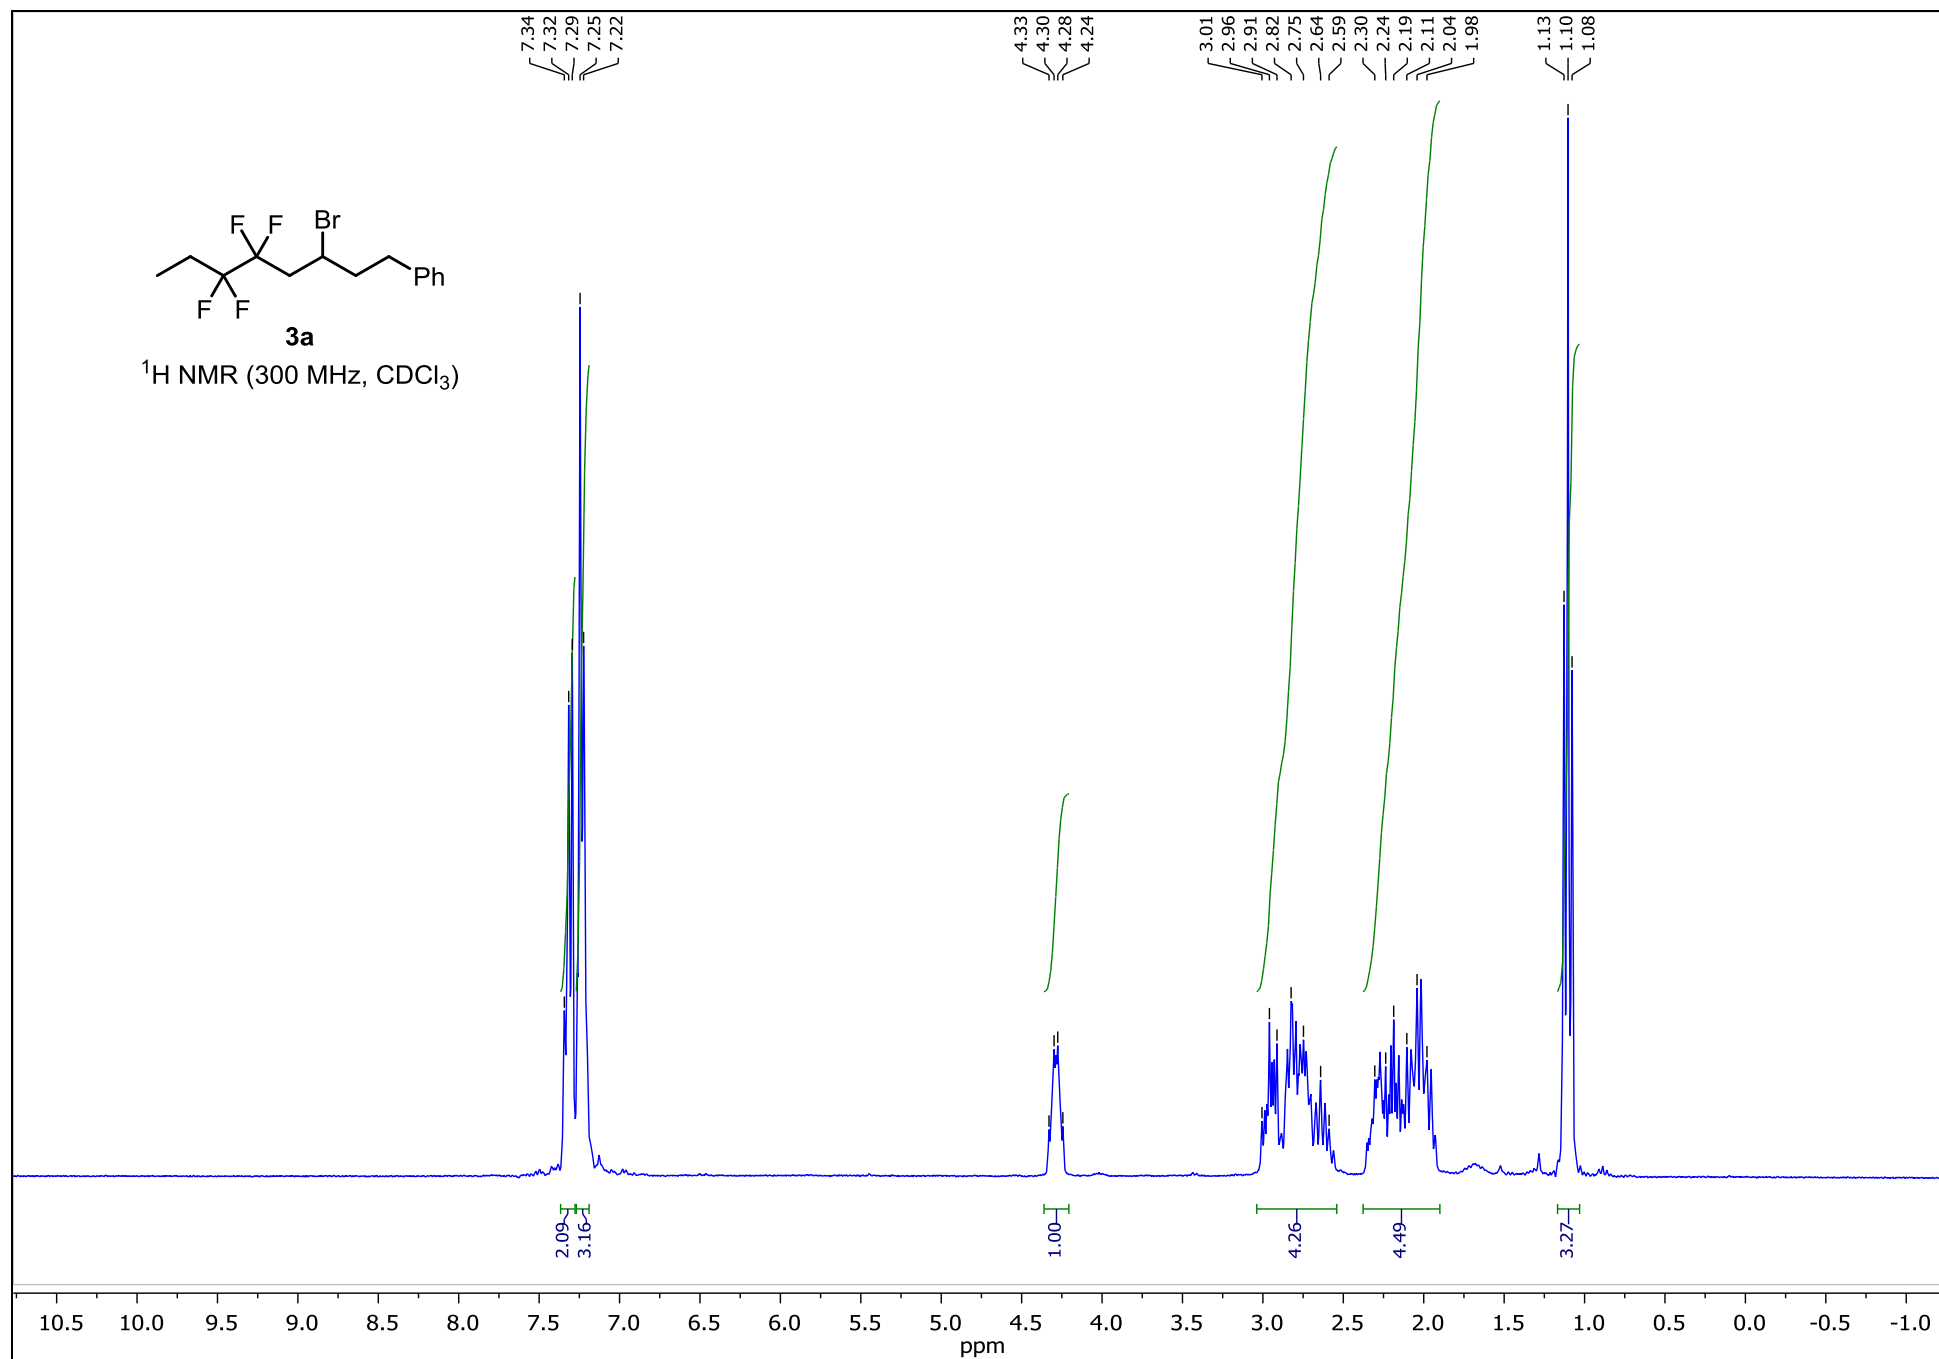

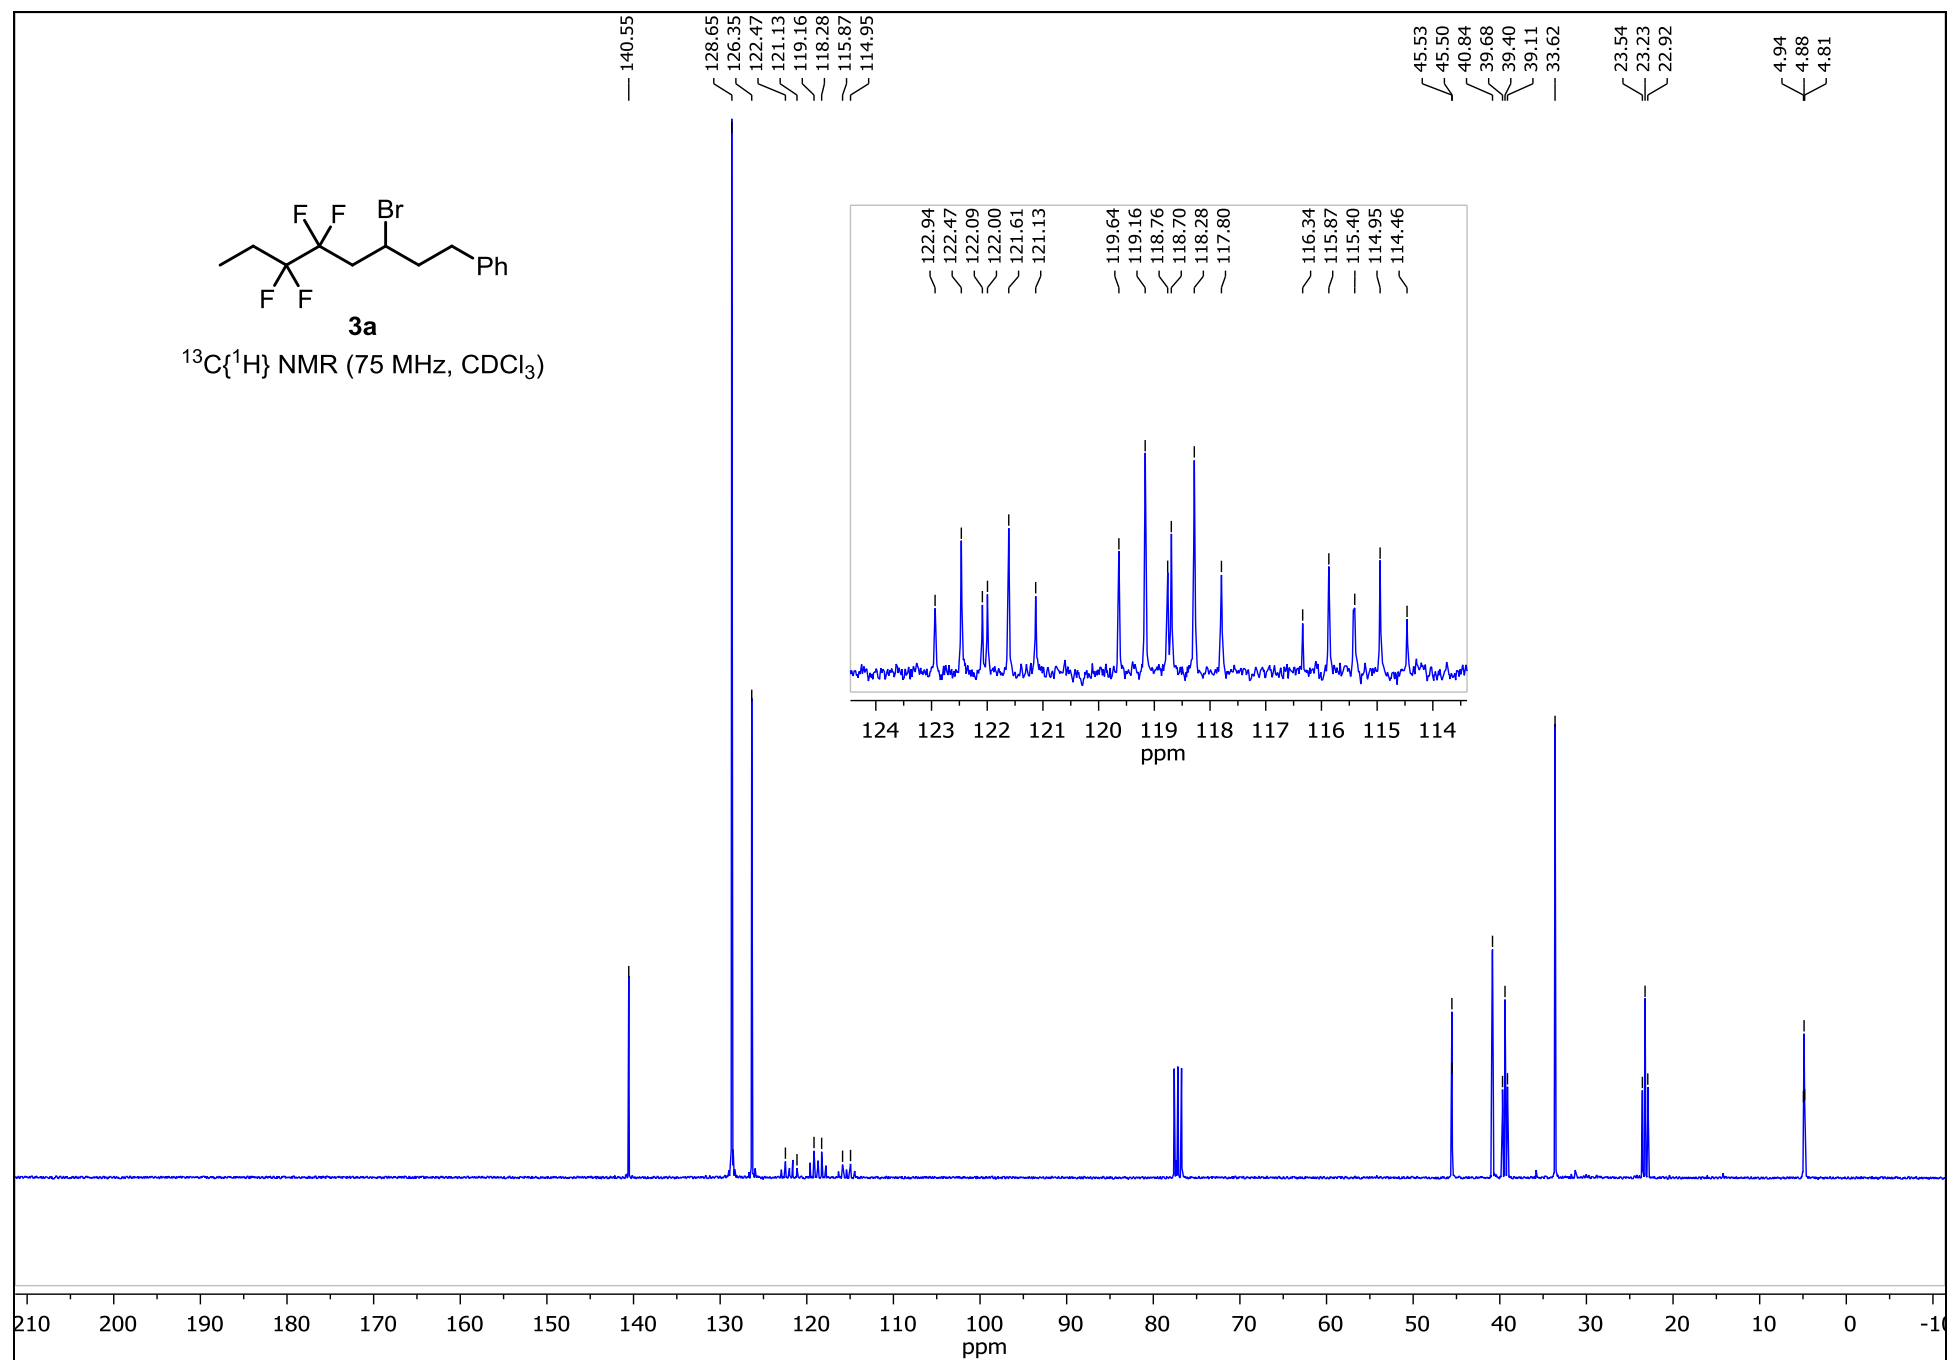

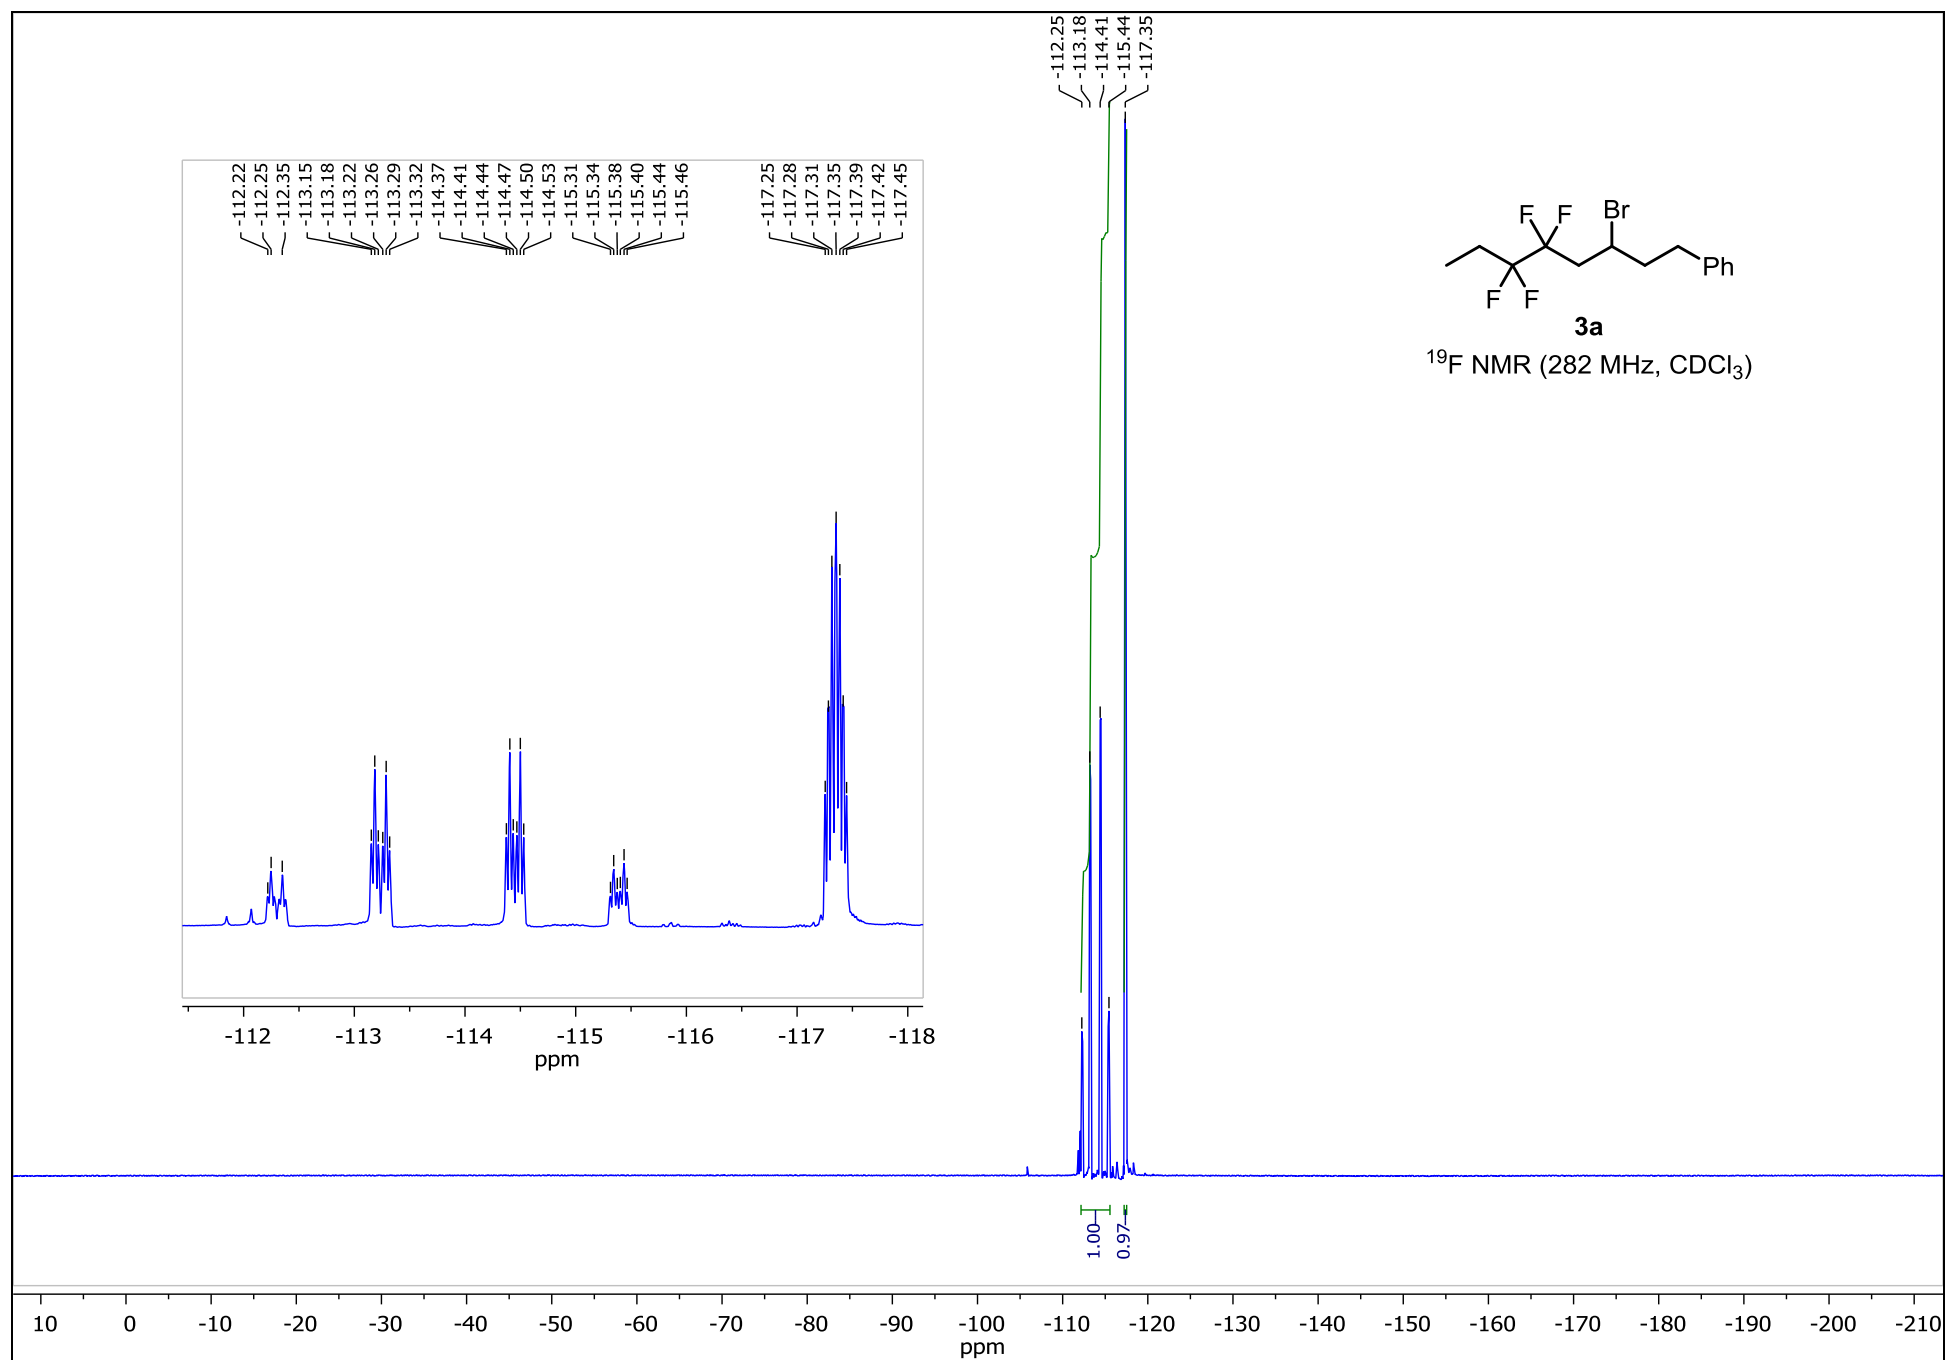

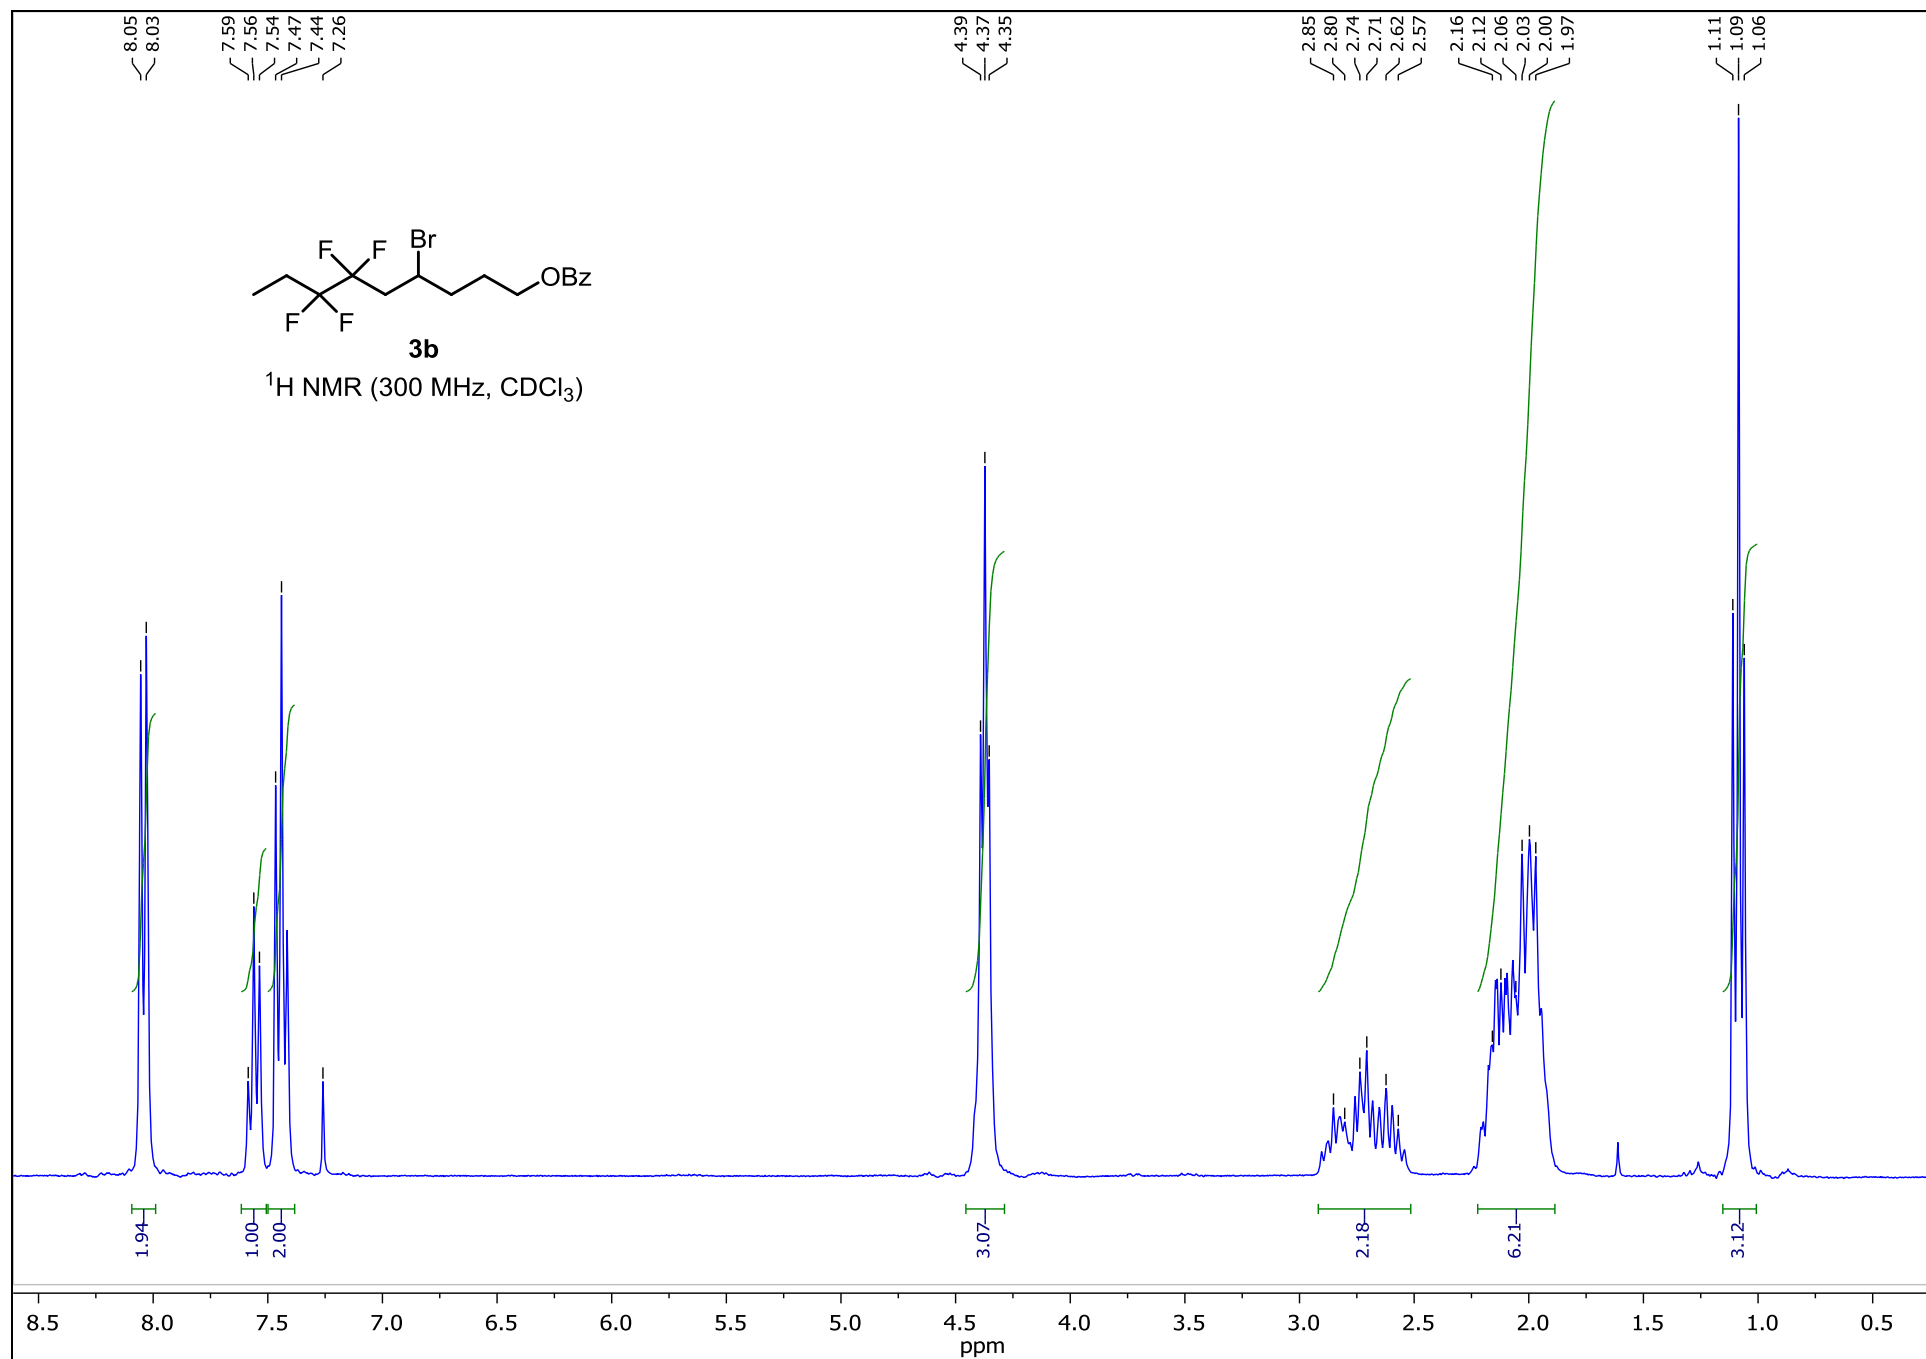

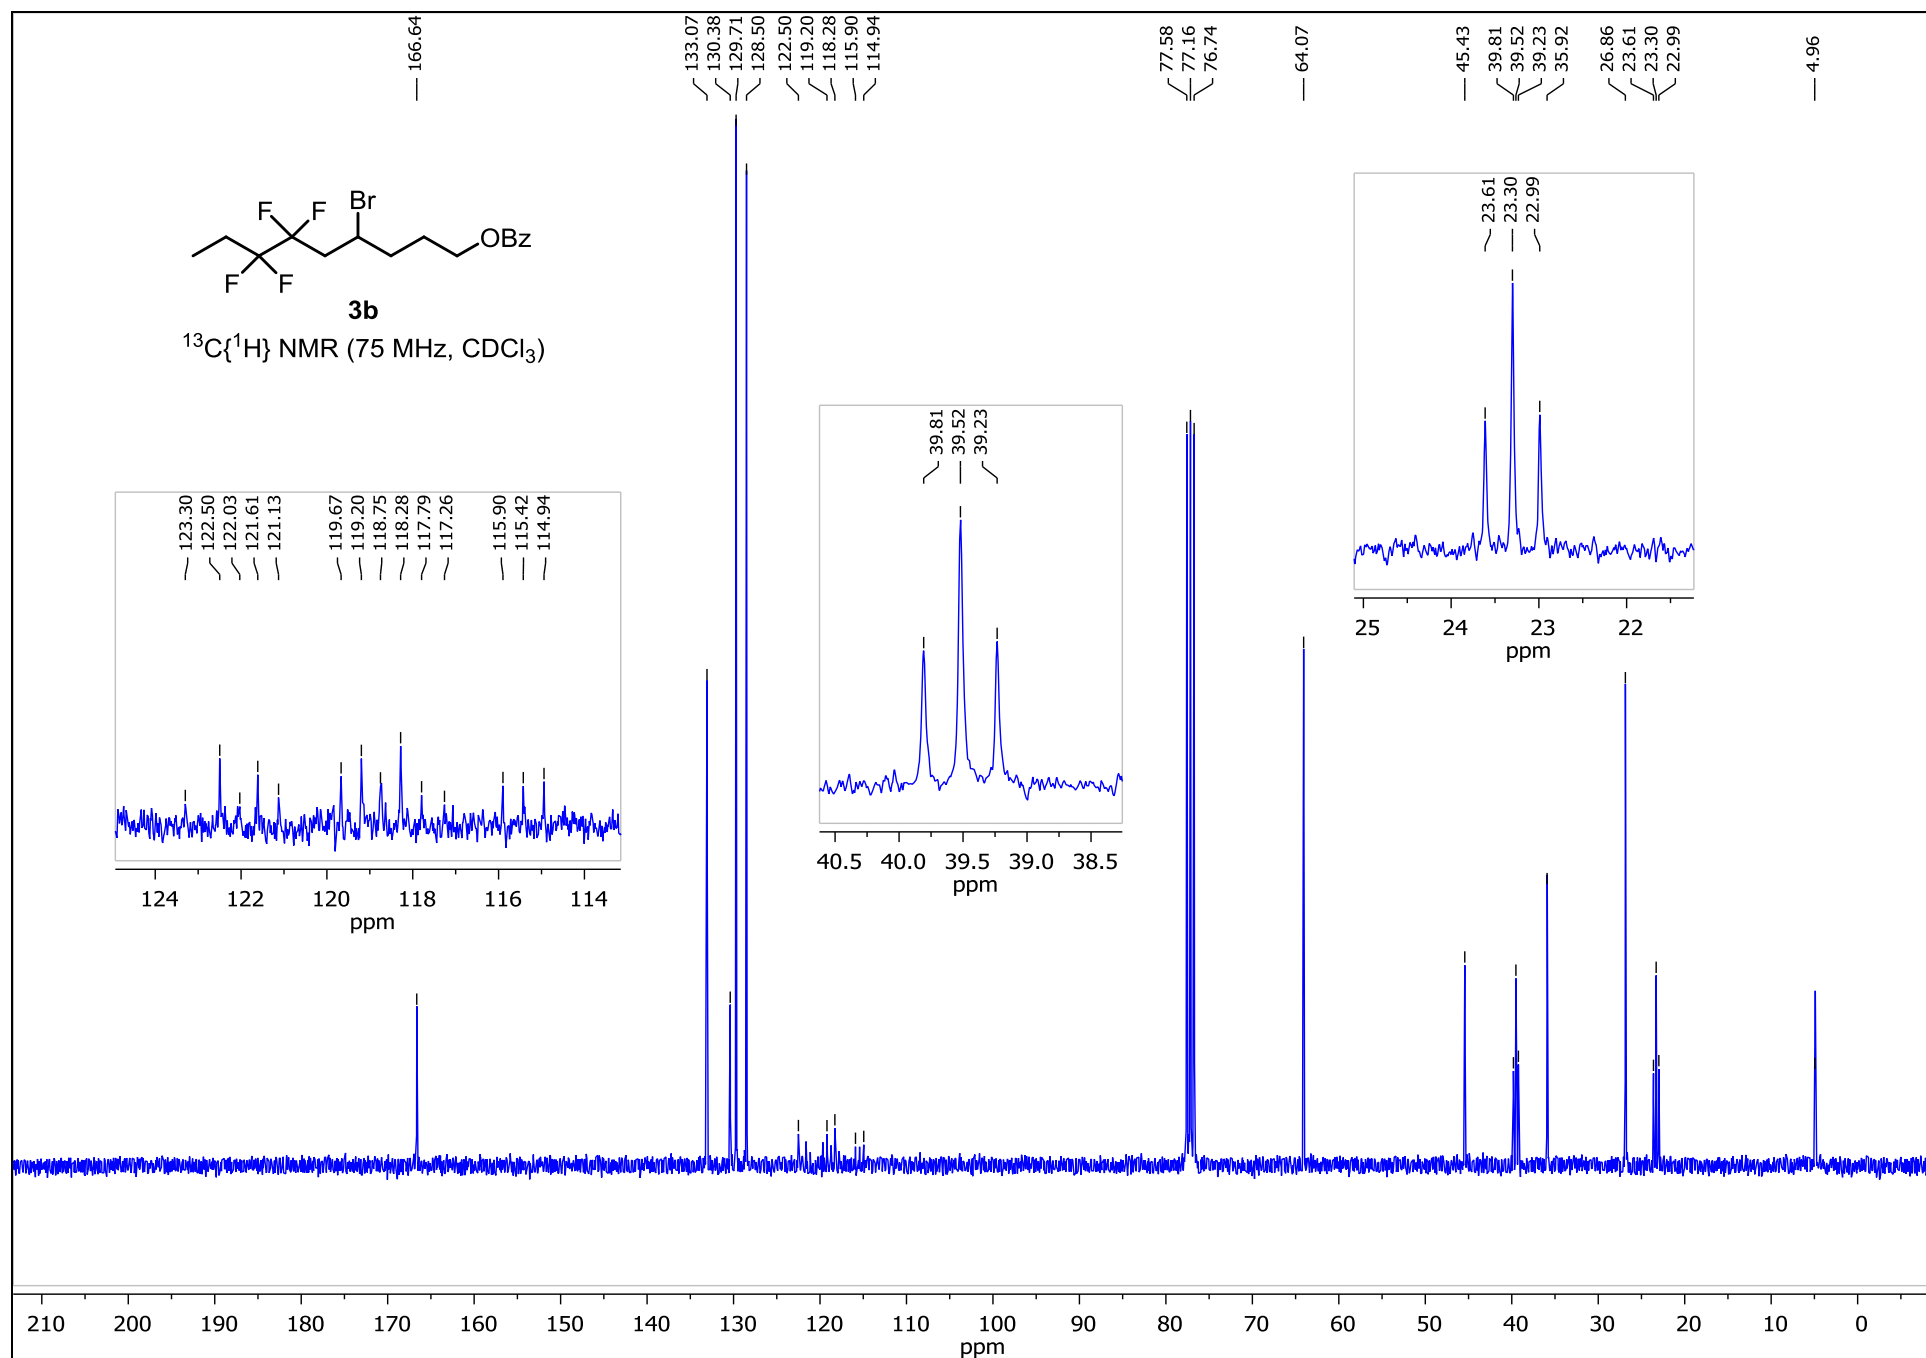

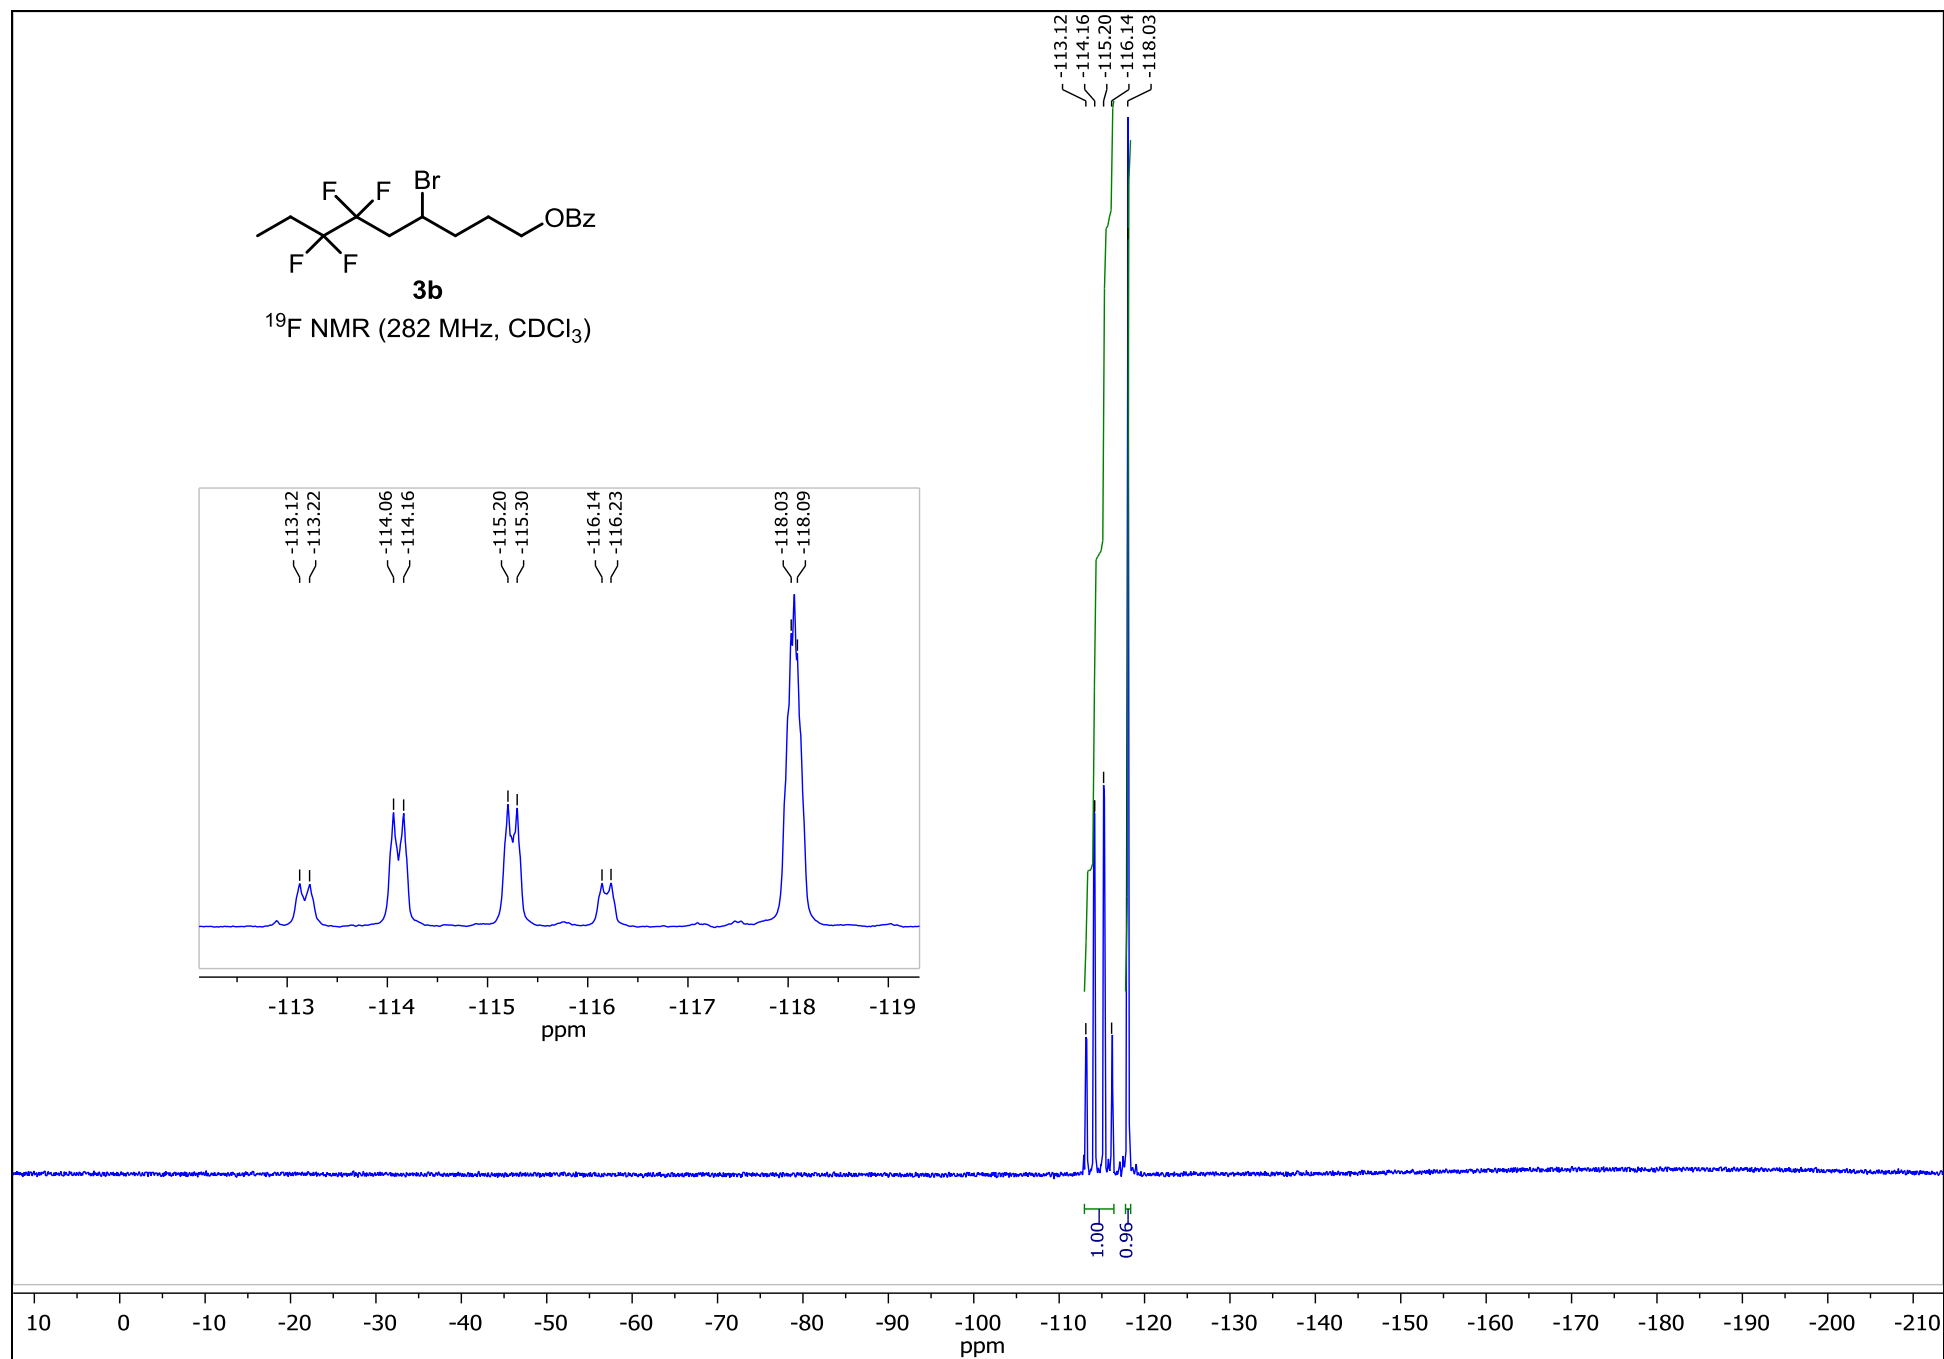

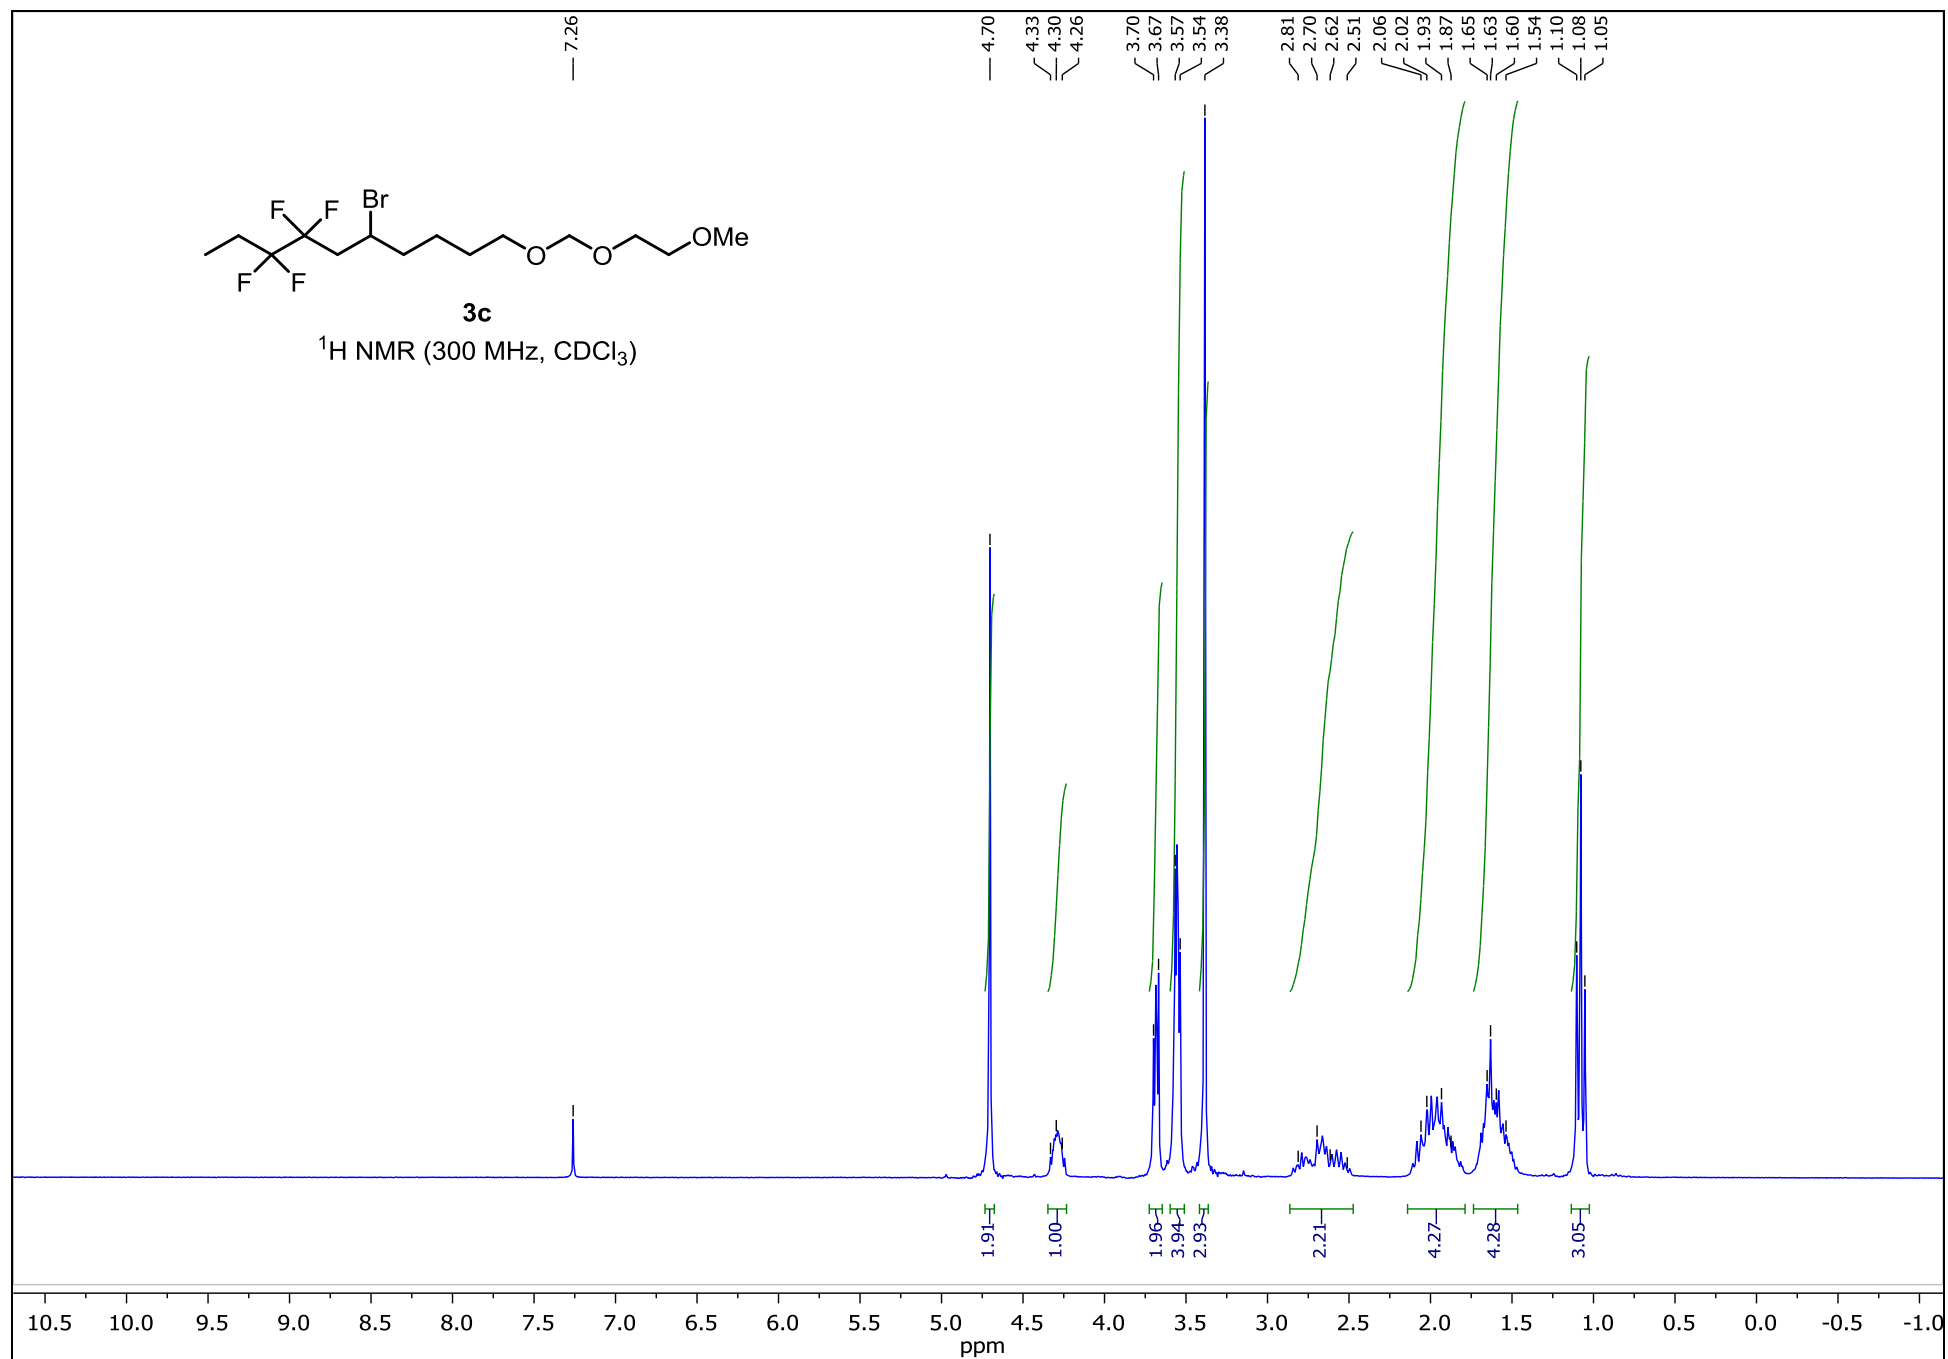

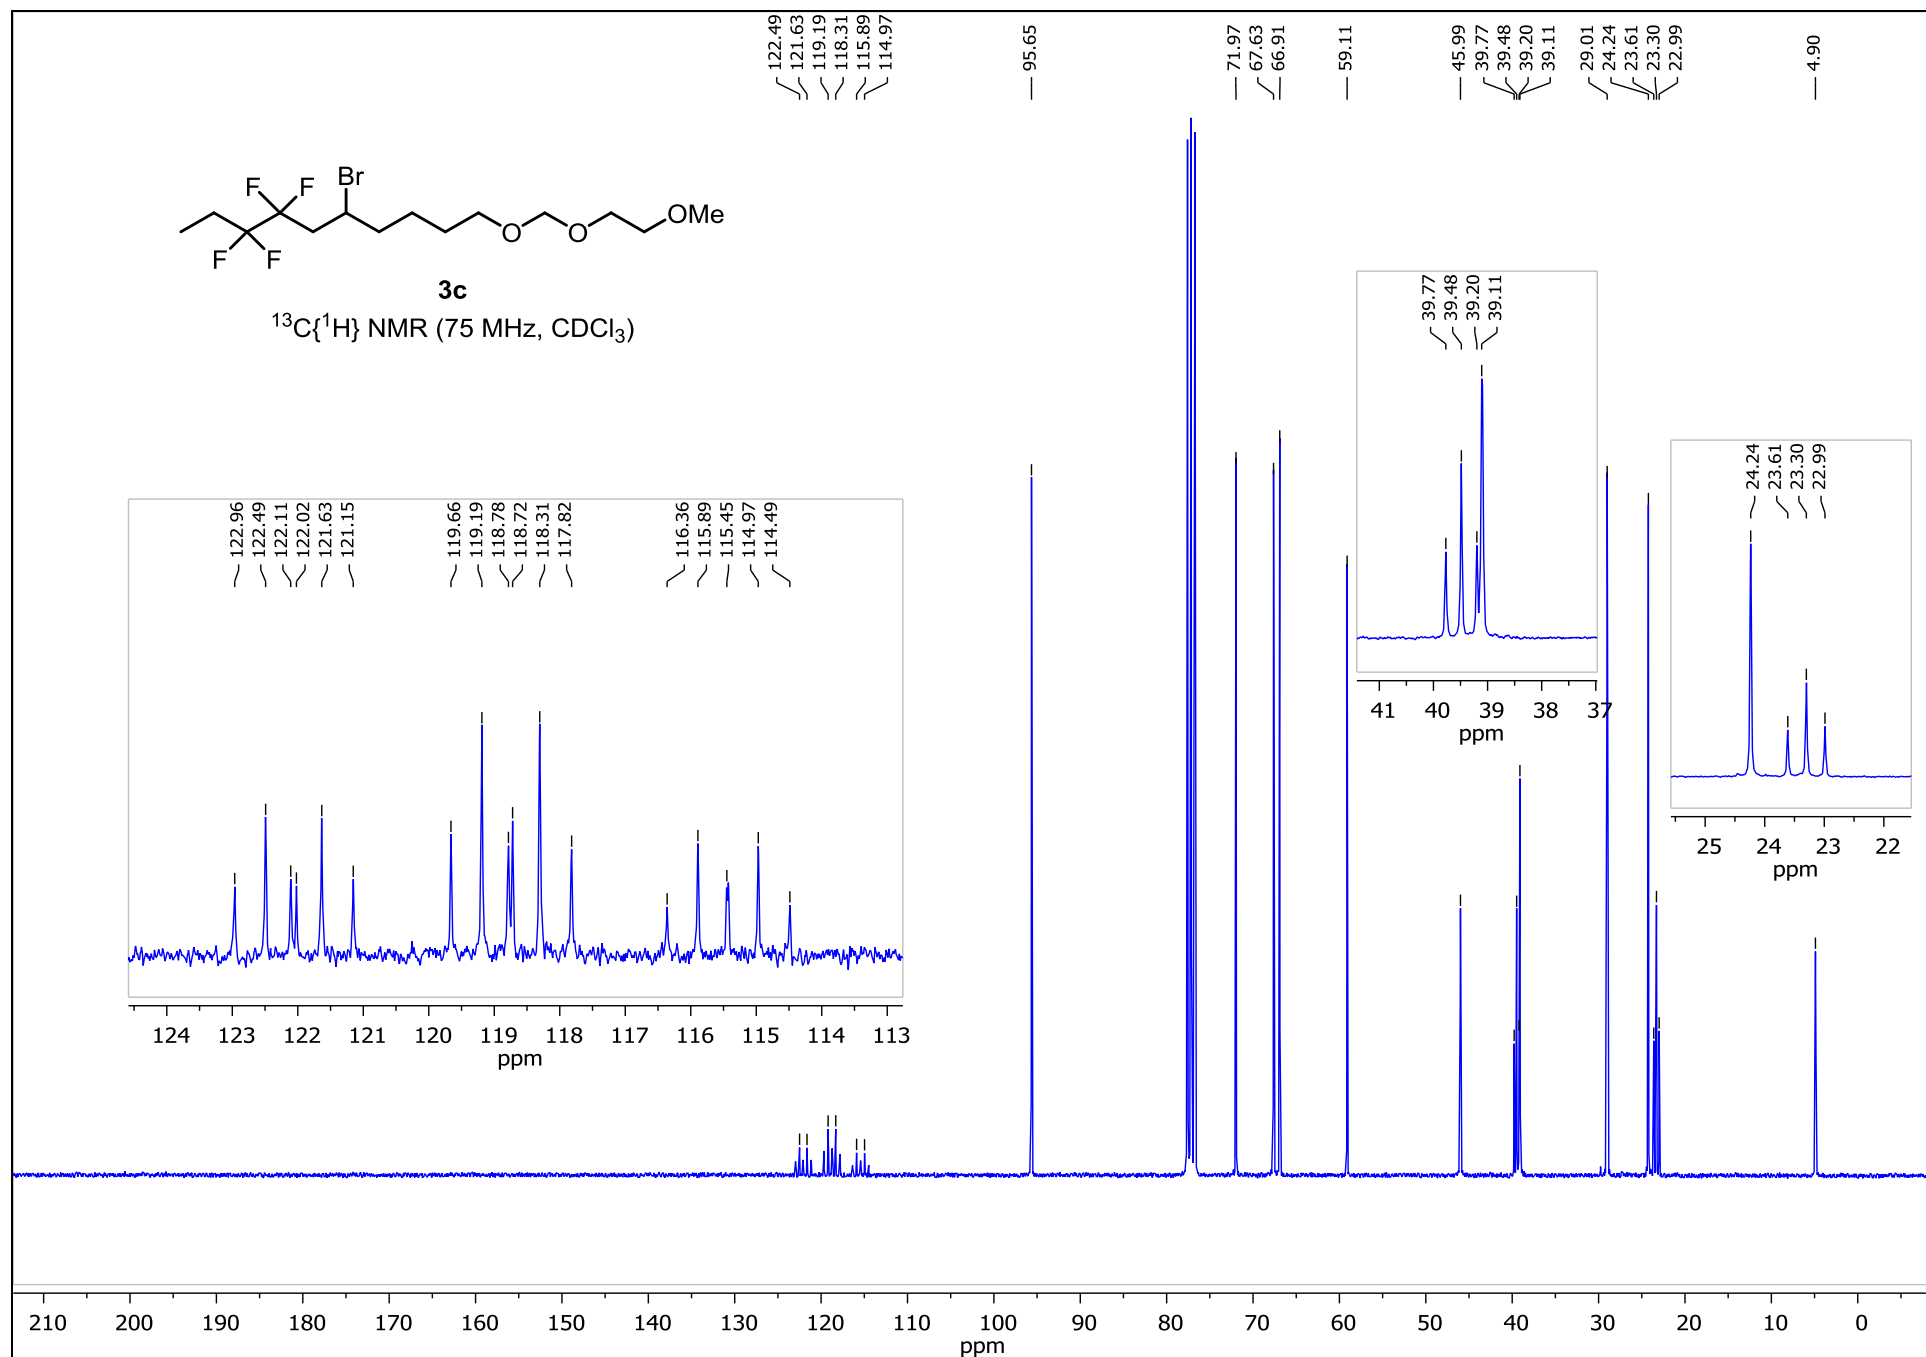



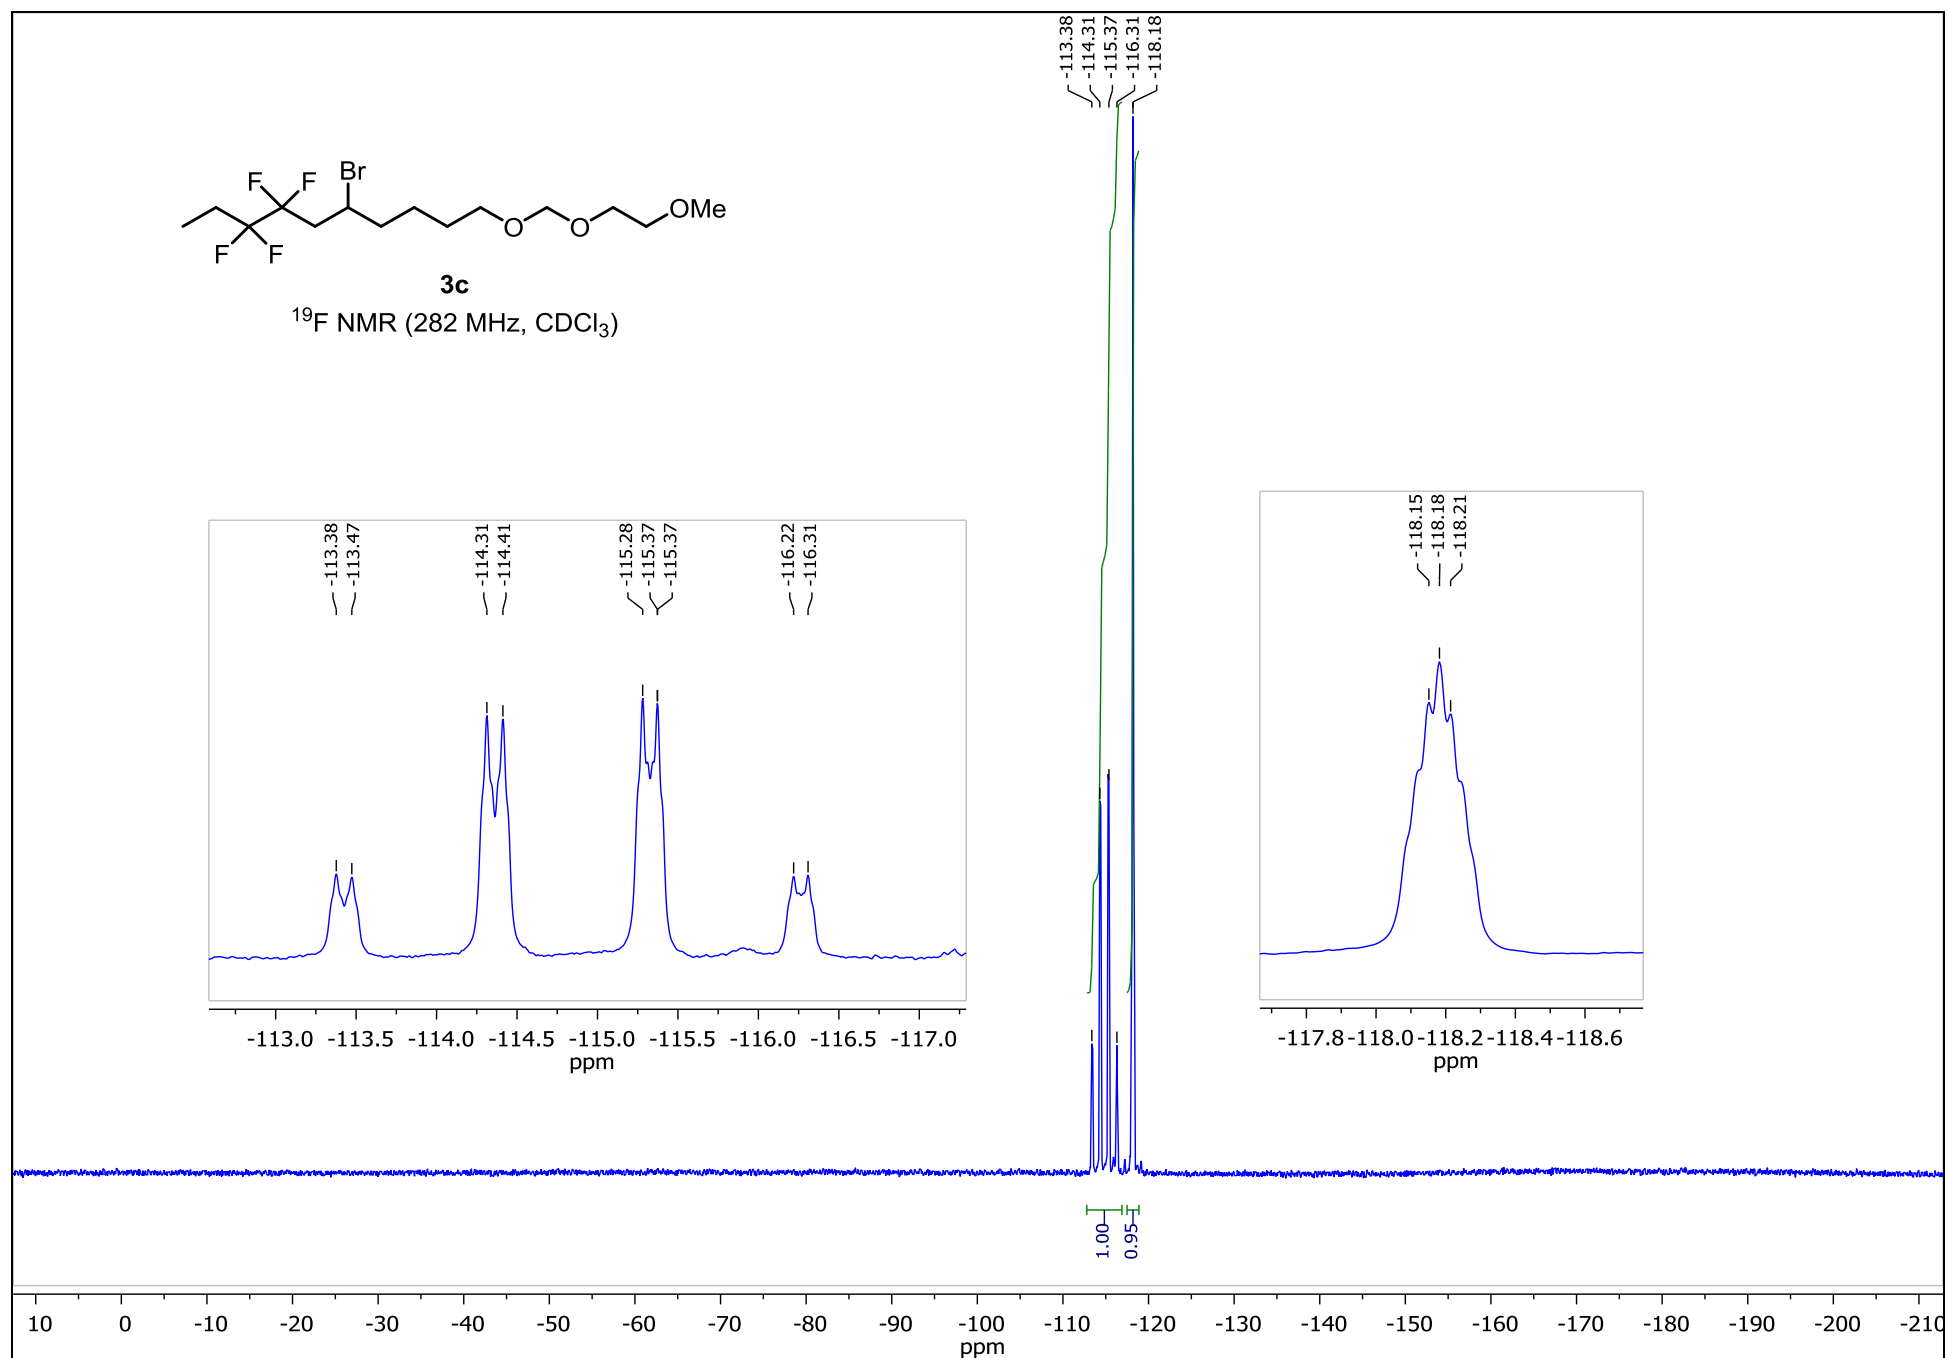

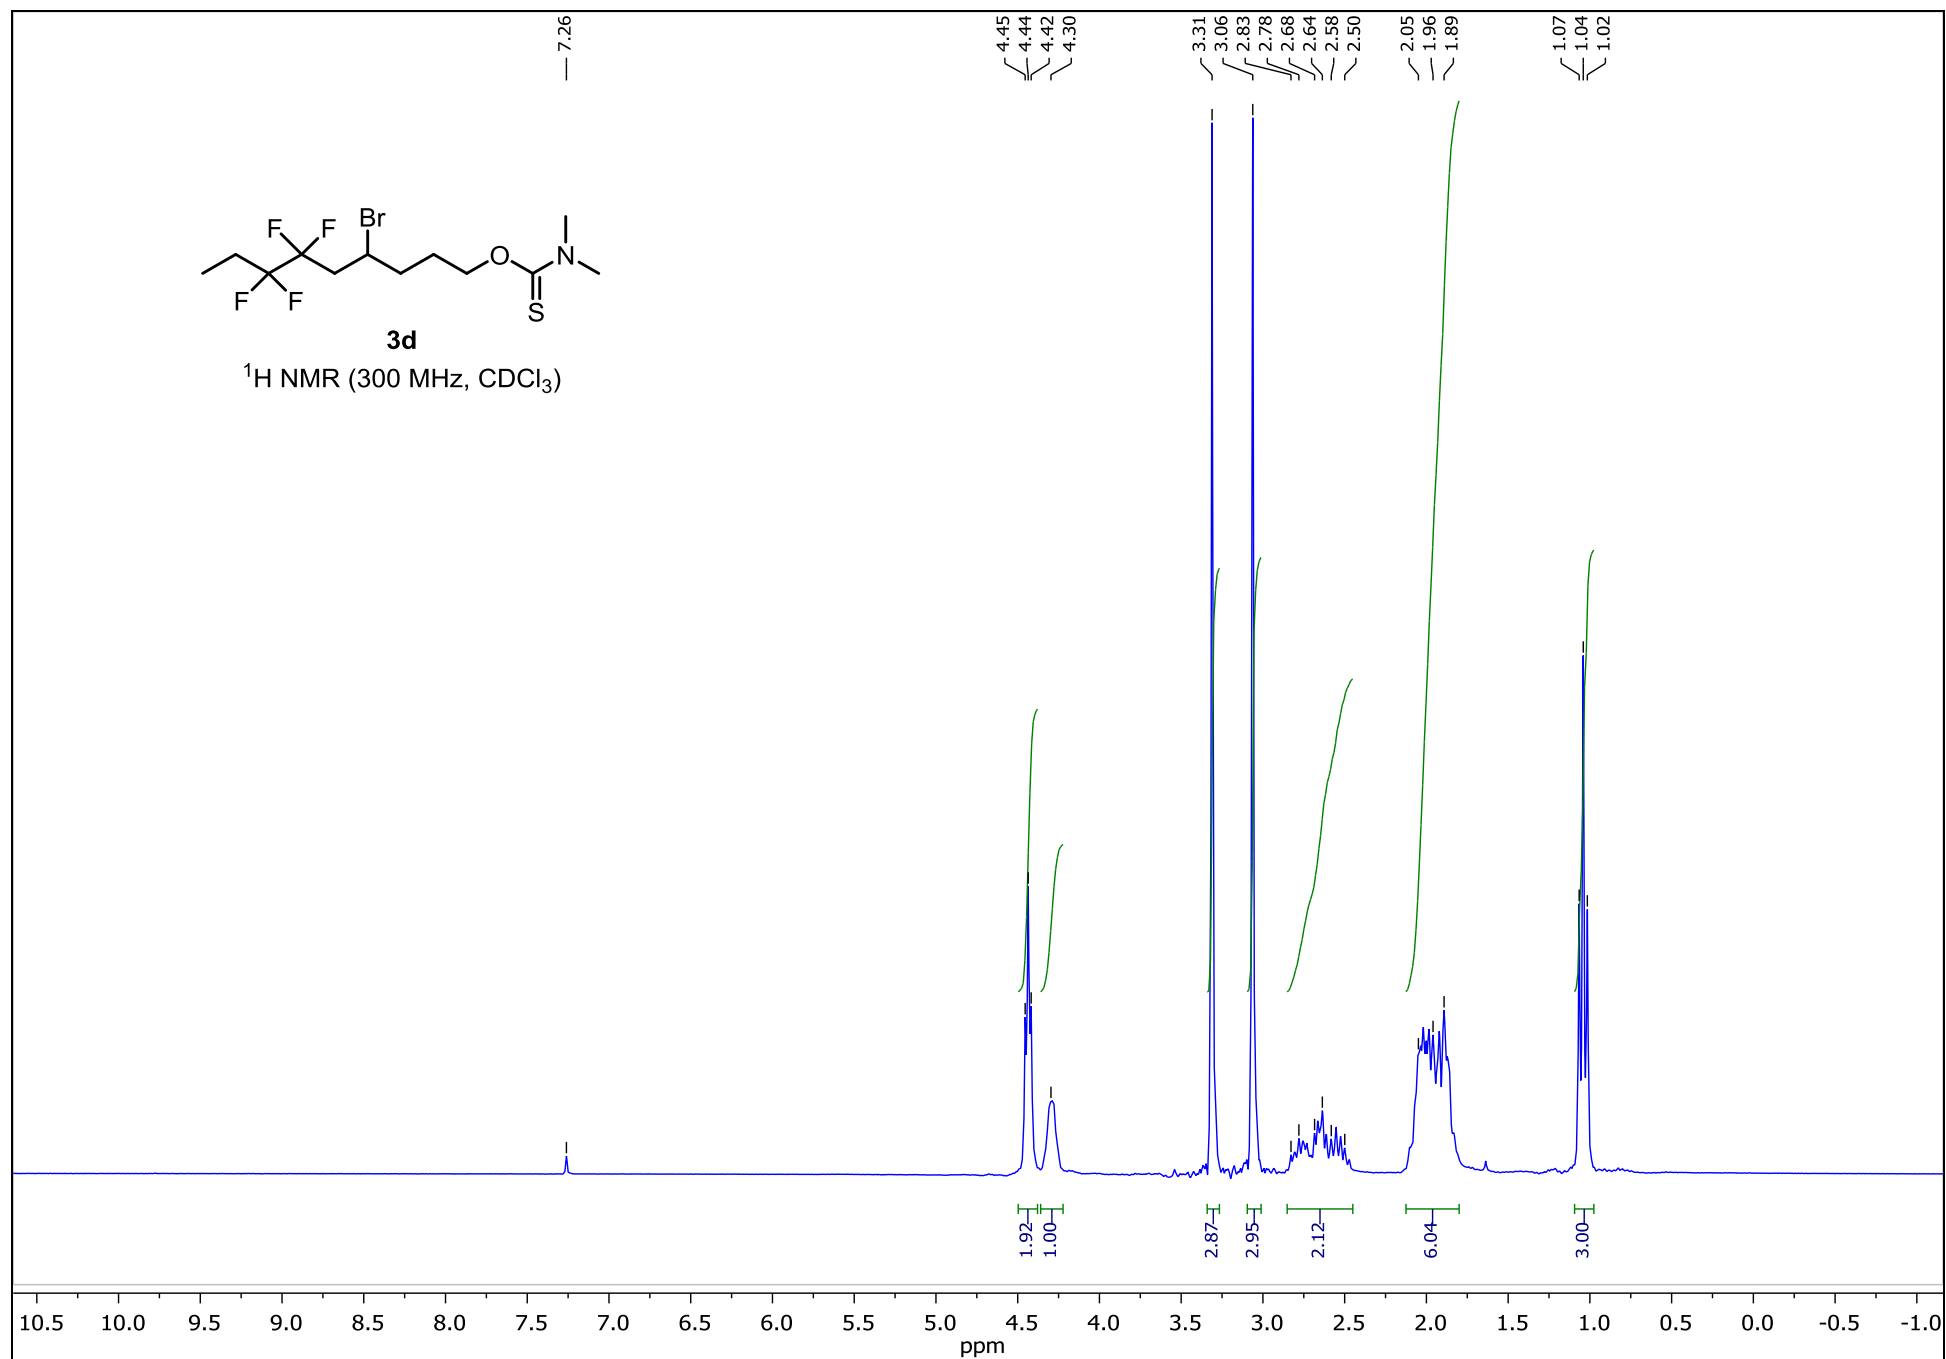

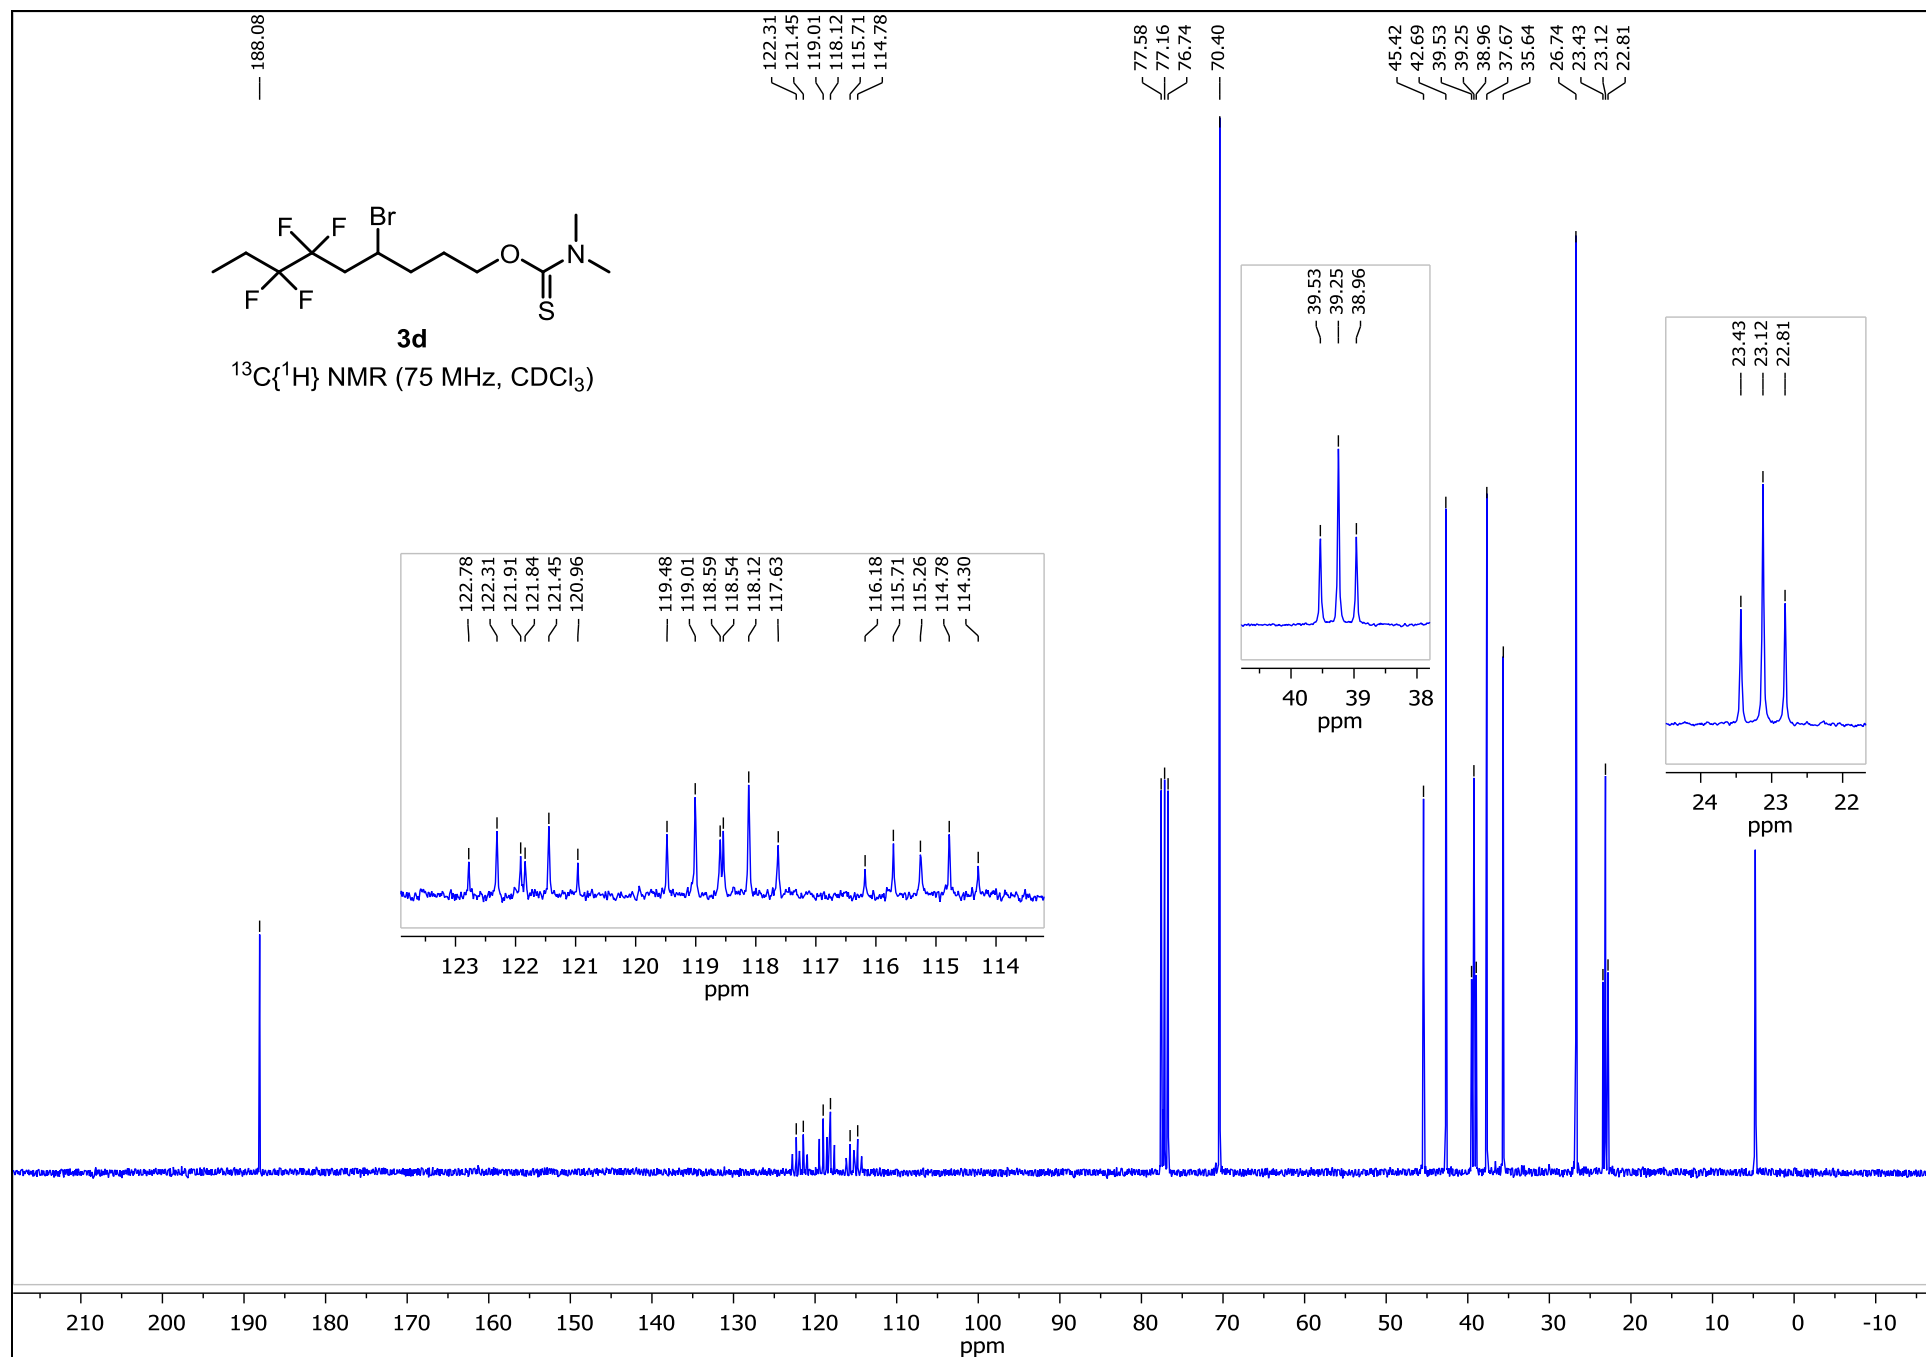

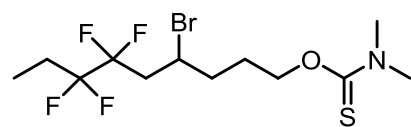**3d** $^{19}\text{F}$  NMR (282 MHz,  $\text{CDCl}_3$ )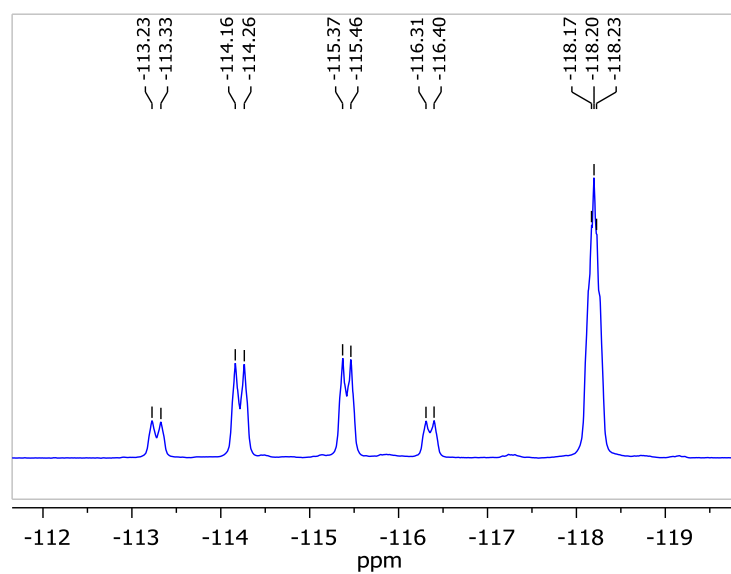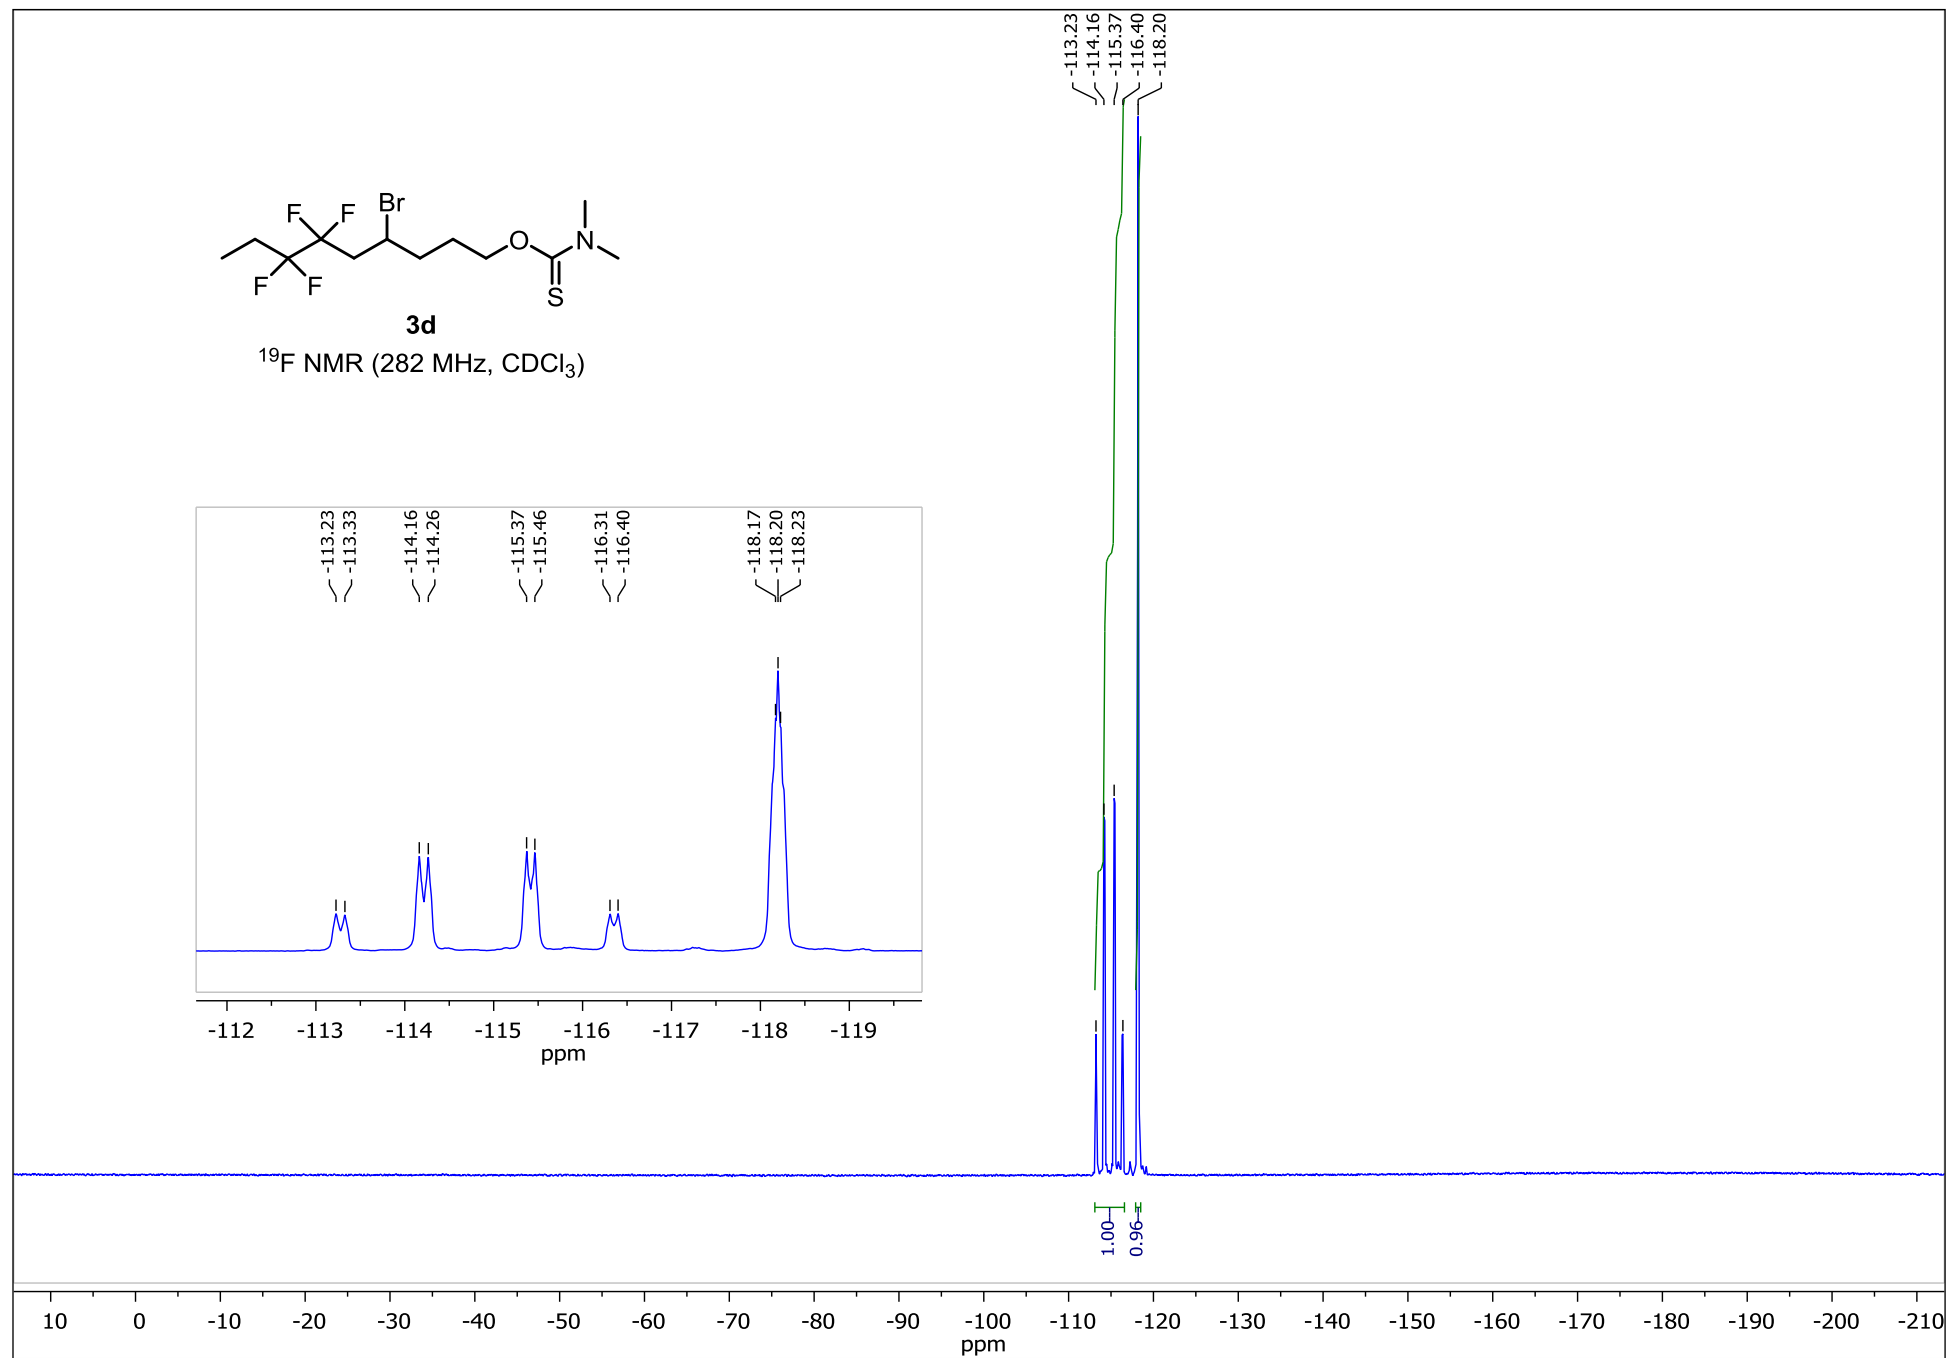

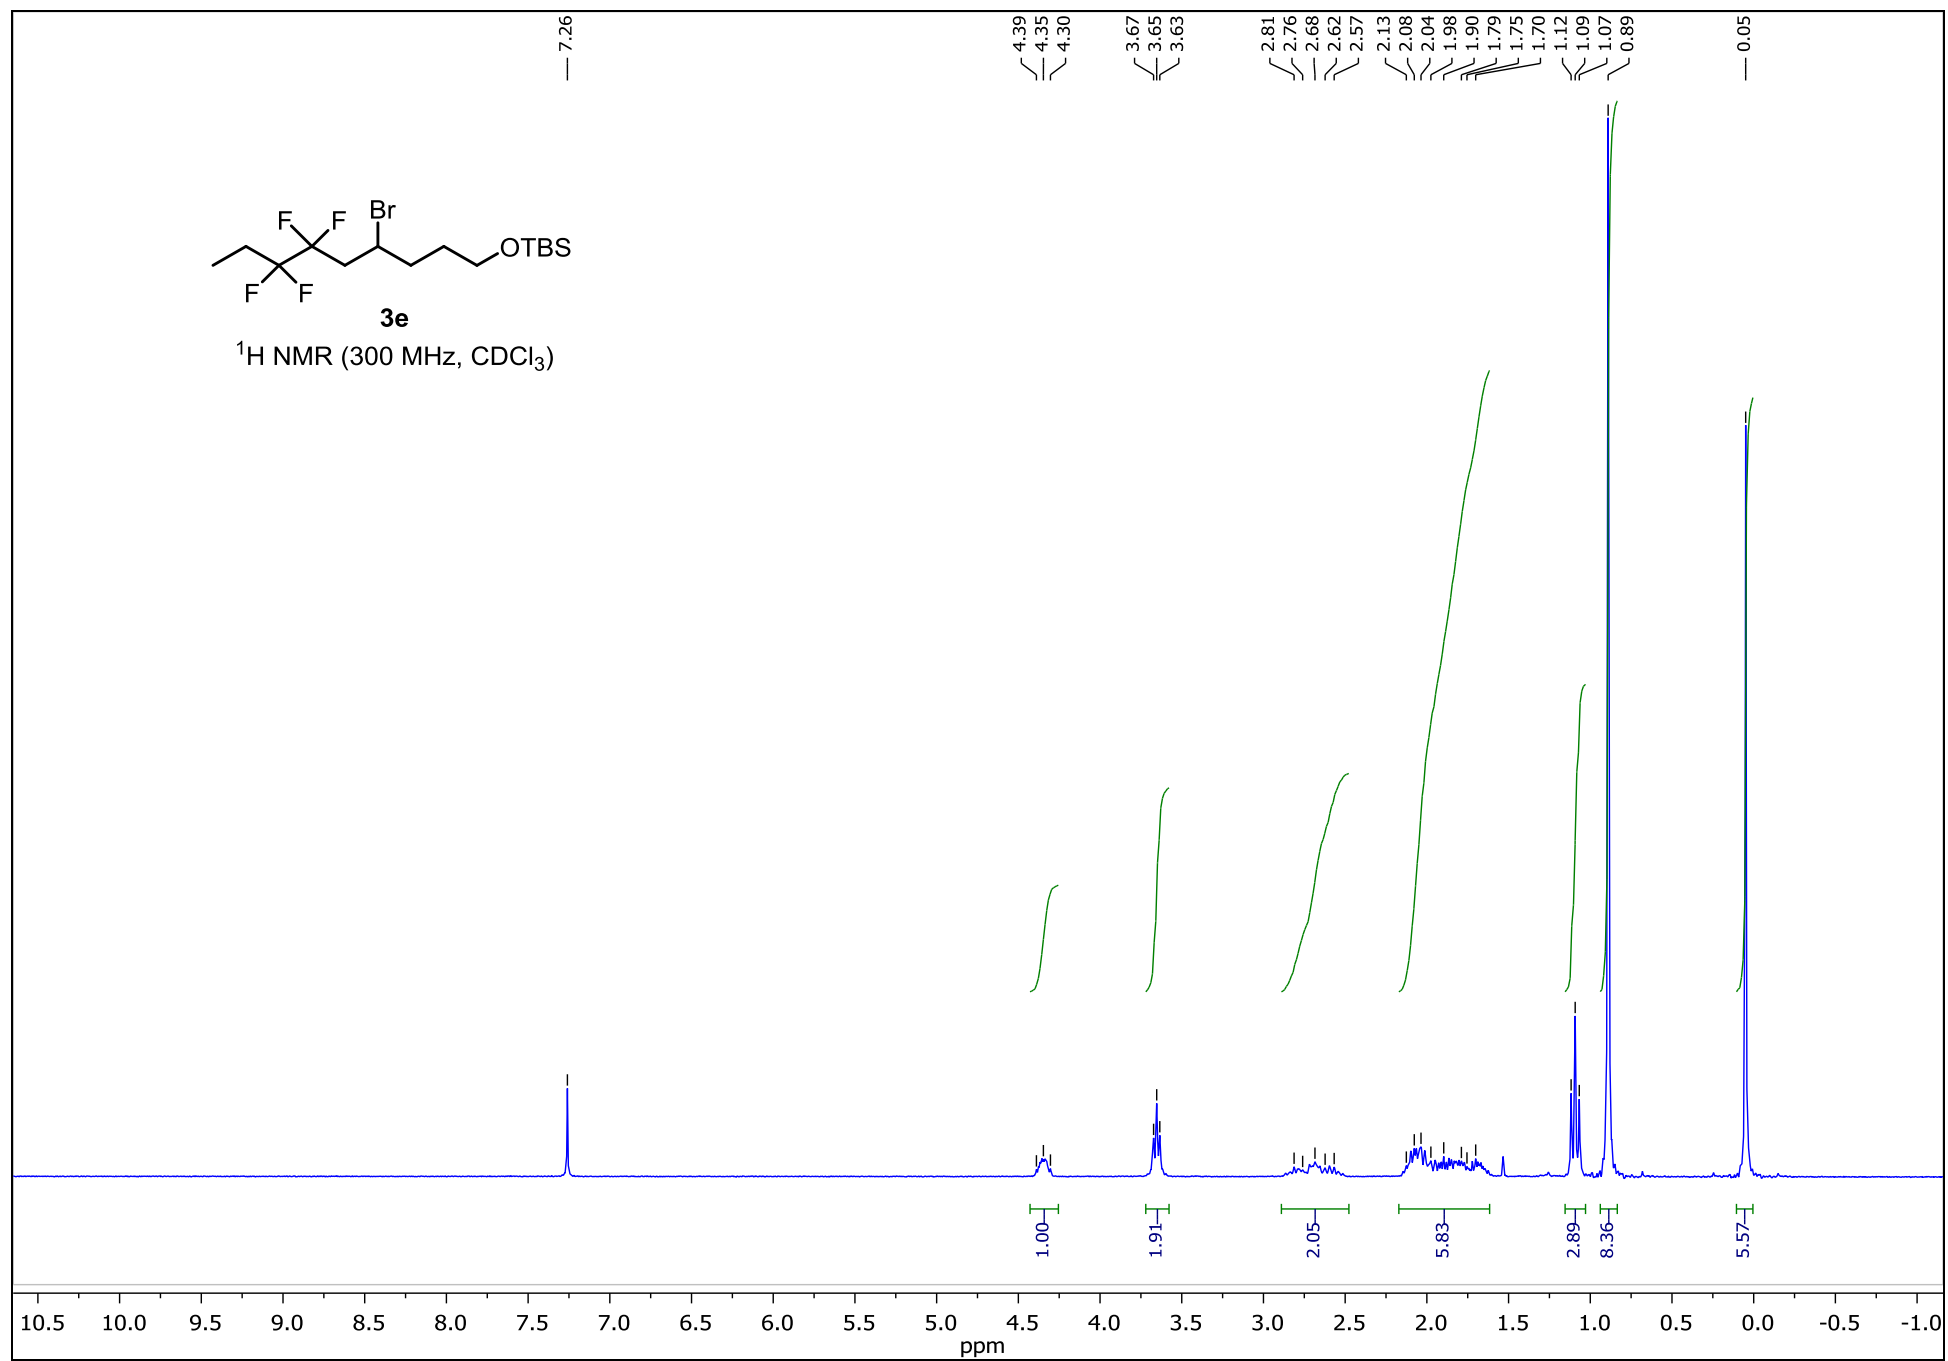

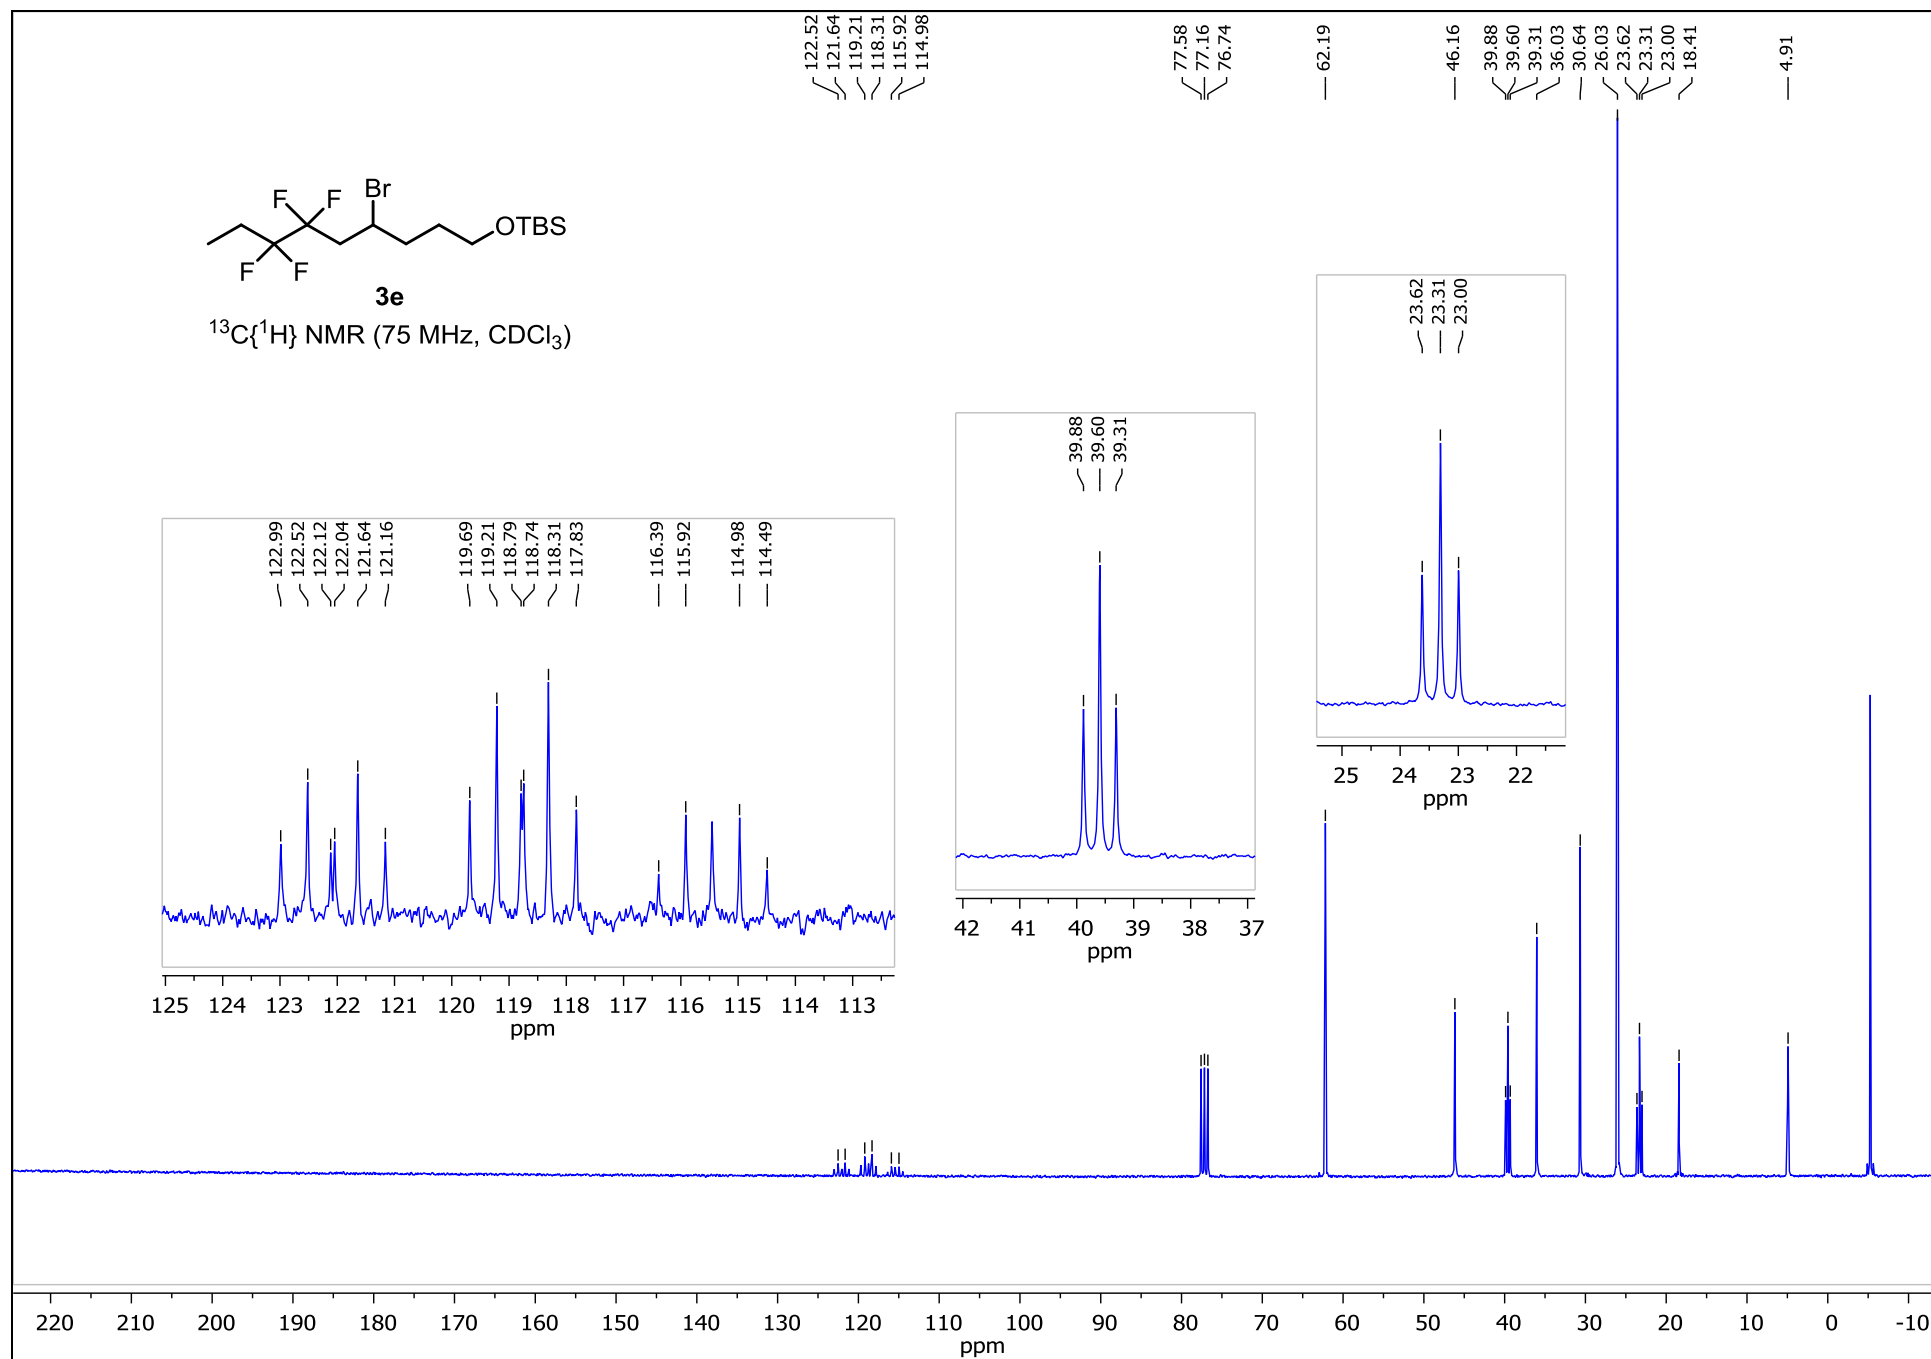

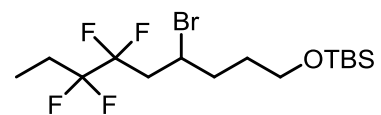

$^{19}\text{F}$  NMR (282 MHz,  $\text{CDCl}_3$ )

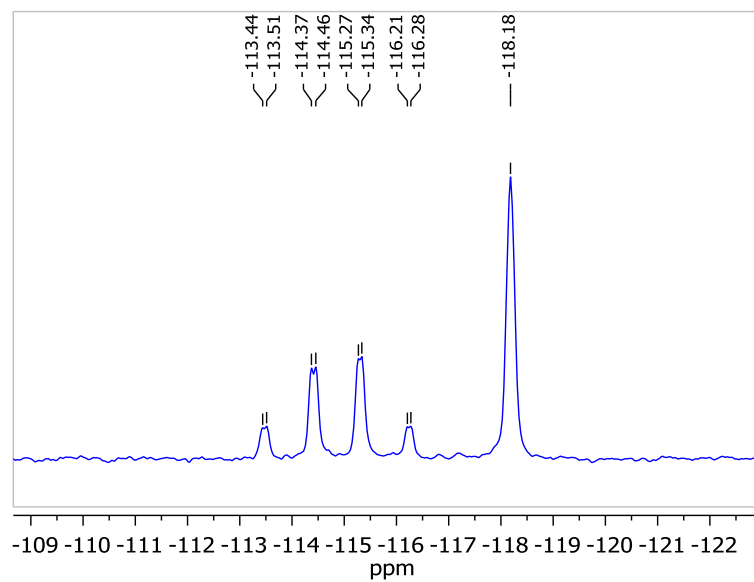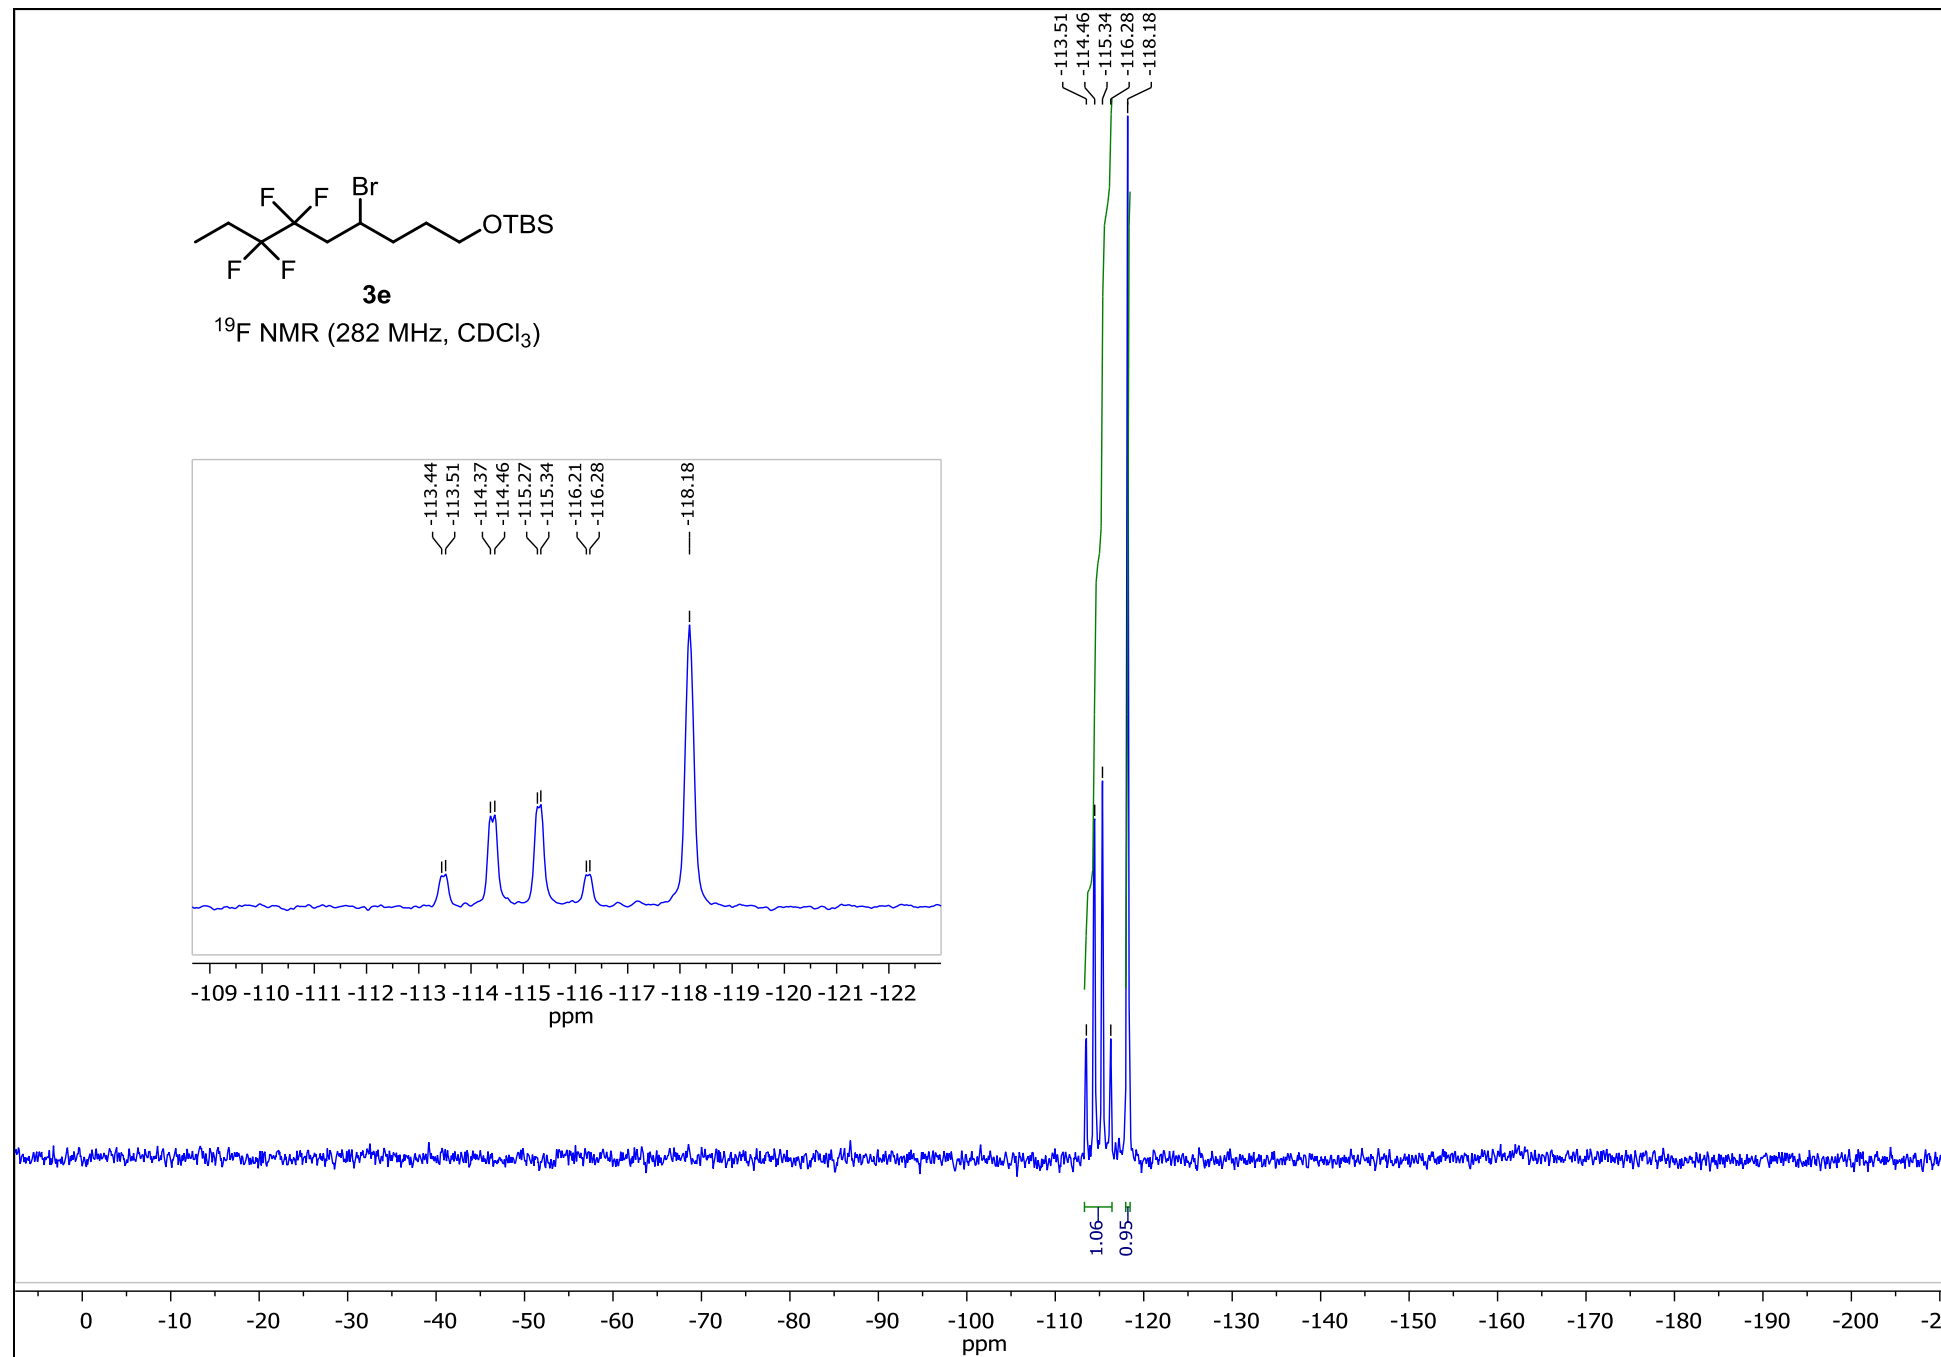

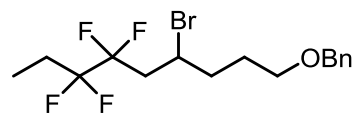

$^1\text{H}$  NMR (300 MHz,  $\text{CDCl}_3$ )

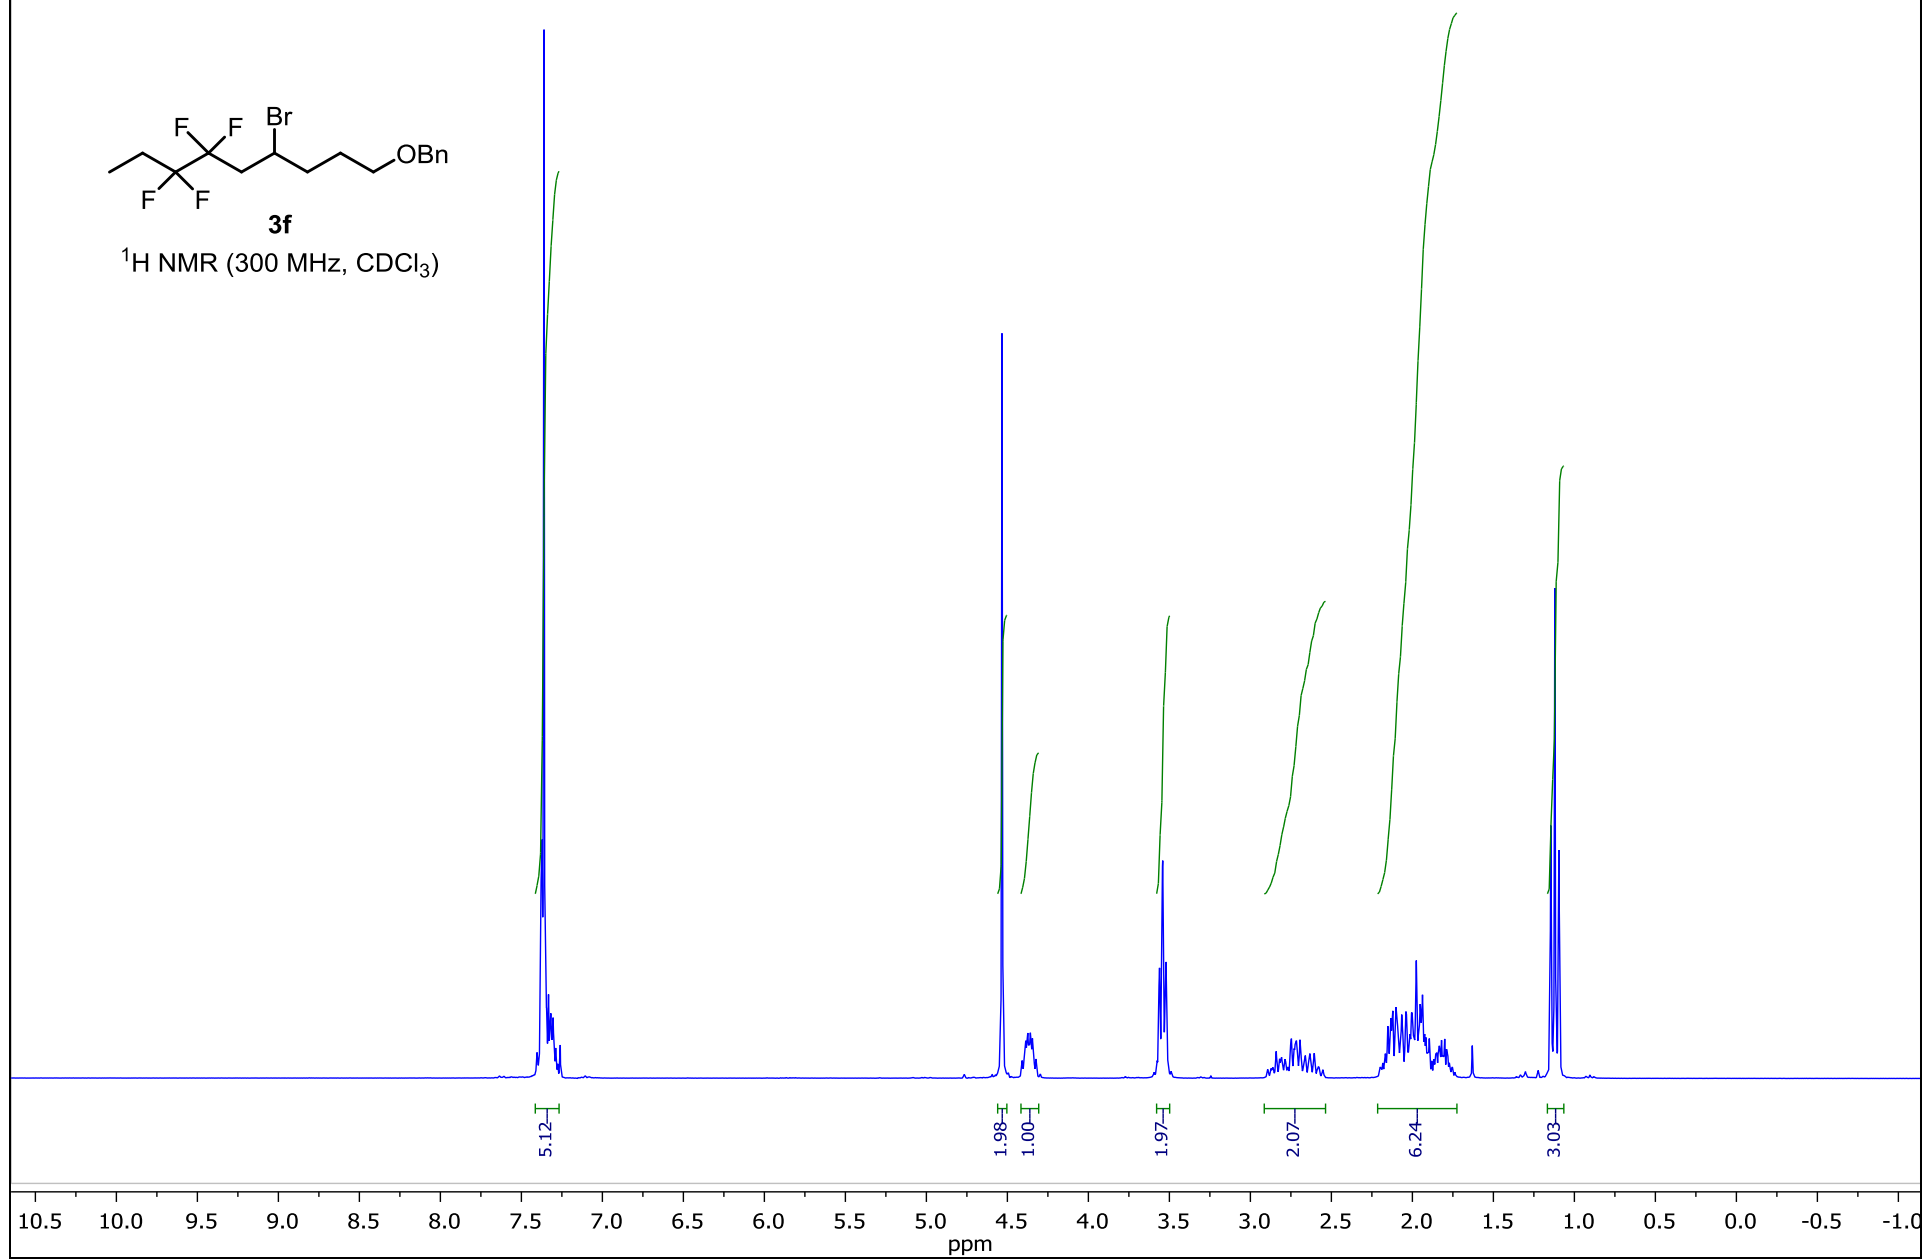



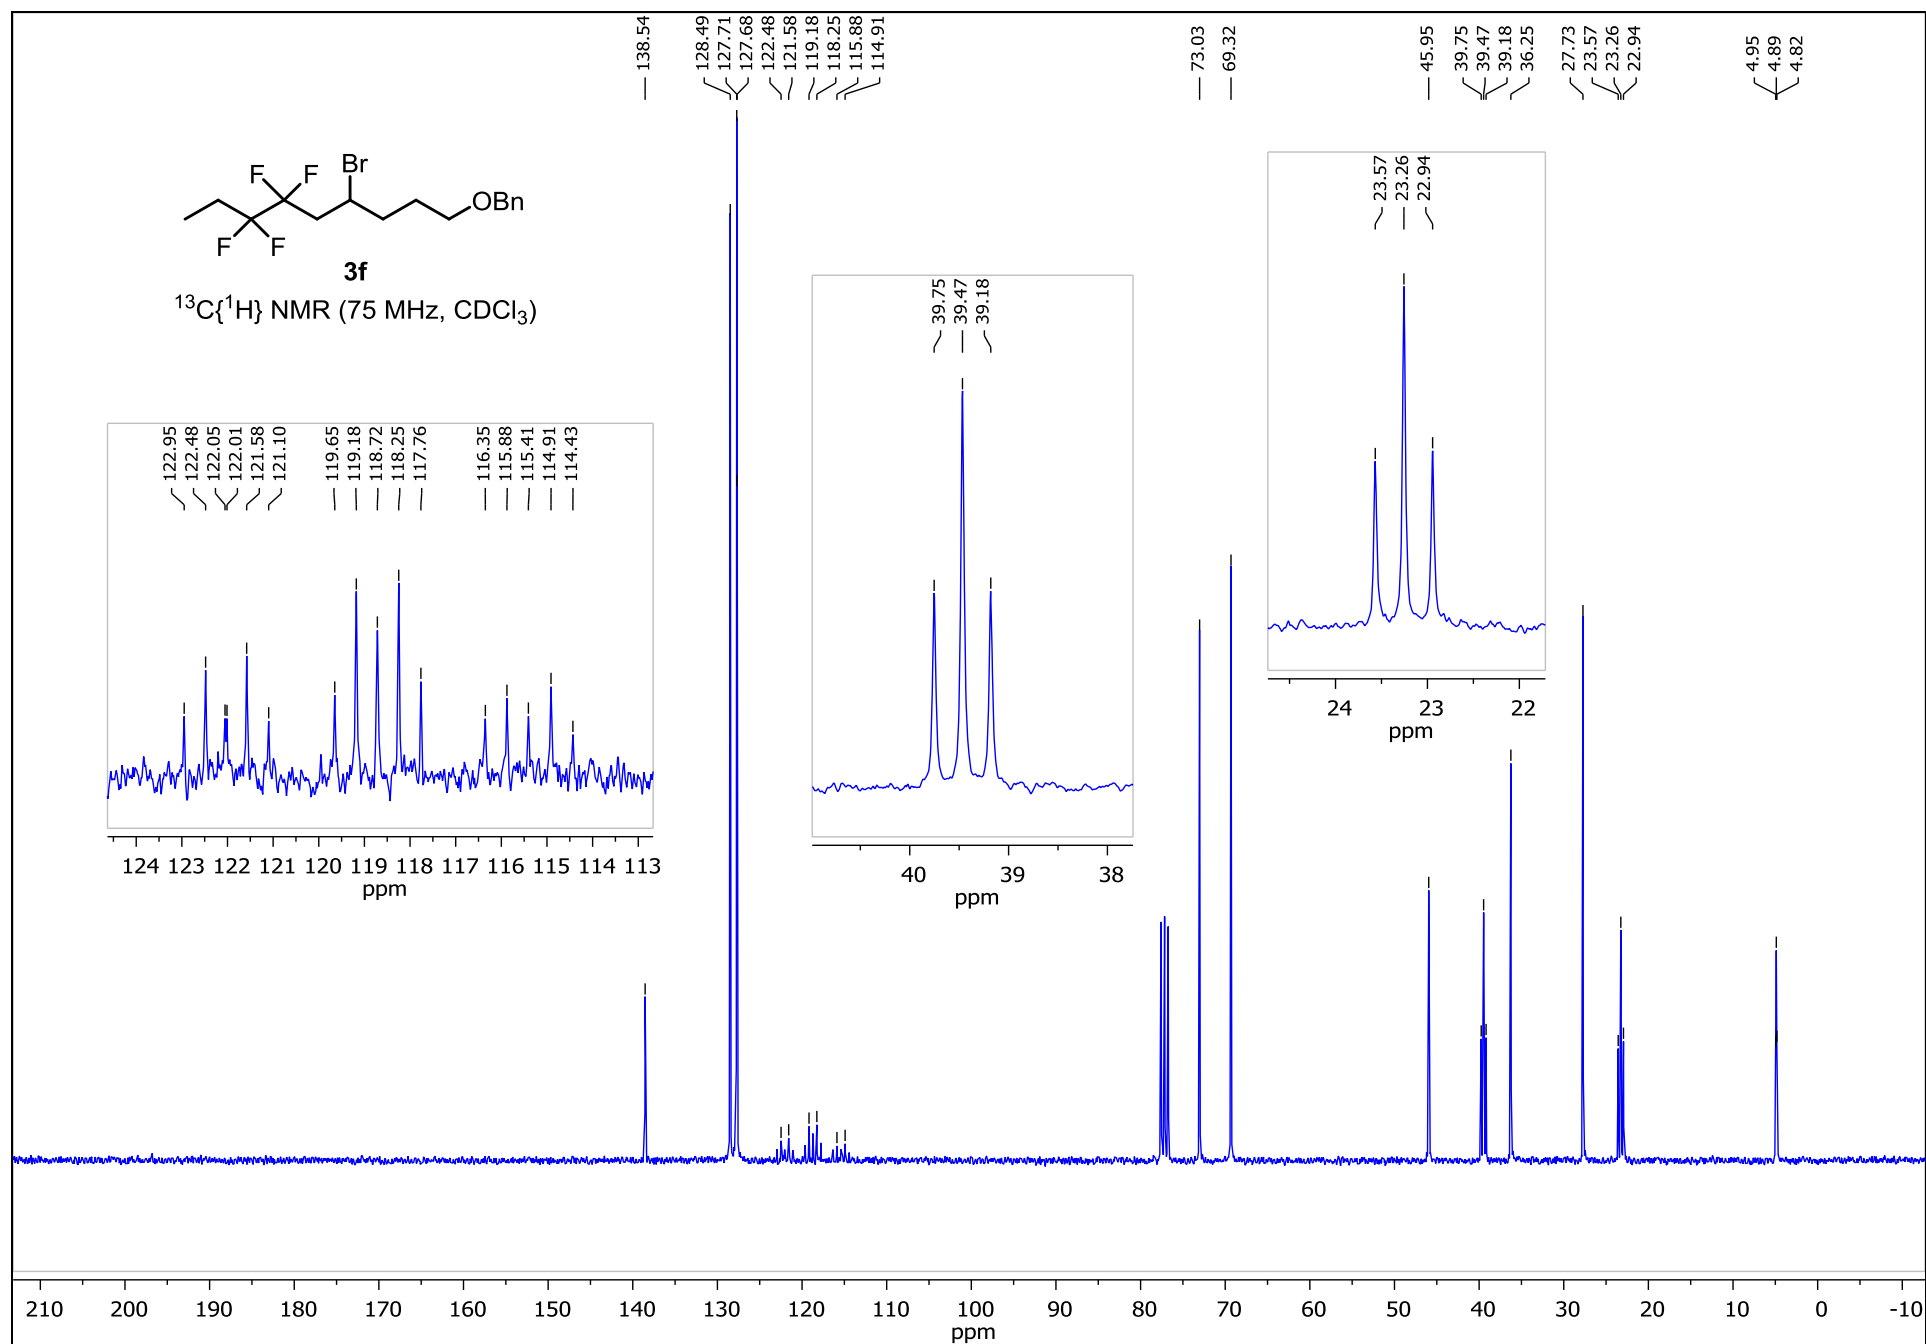

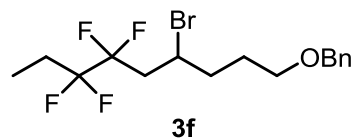

$^{19}\text{F}$  NMR (282 MHz,  $\text{CDCl}_3$ )

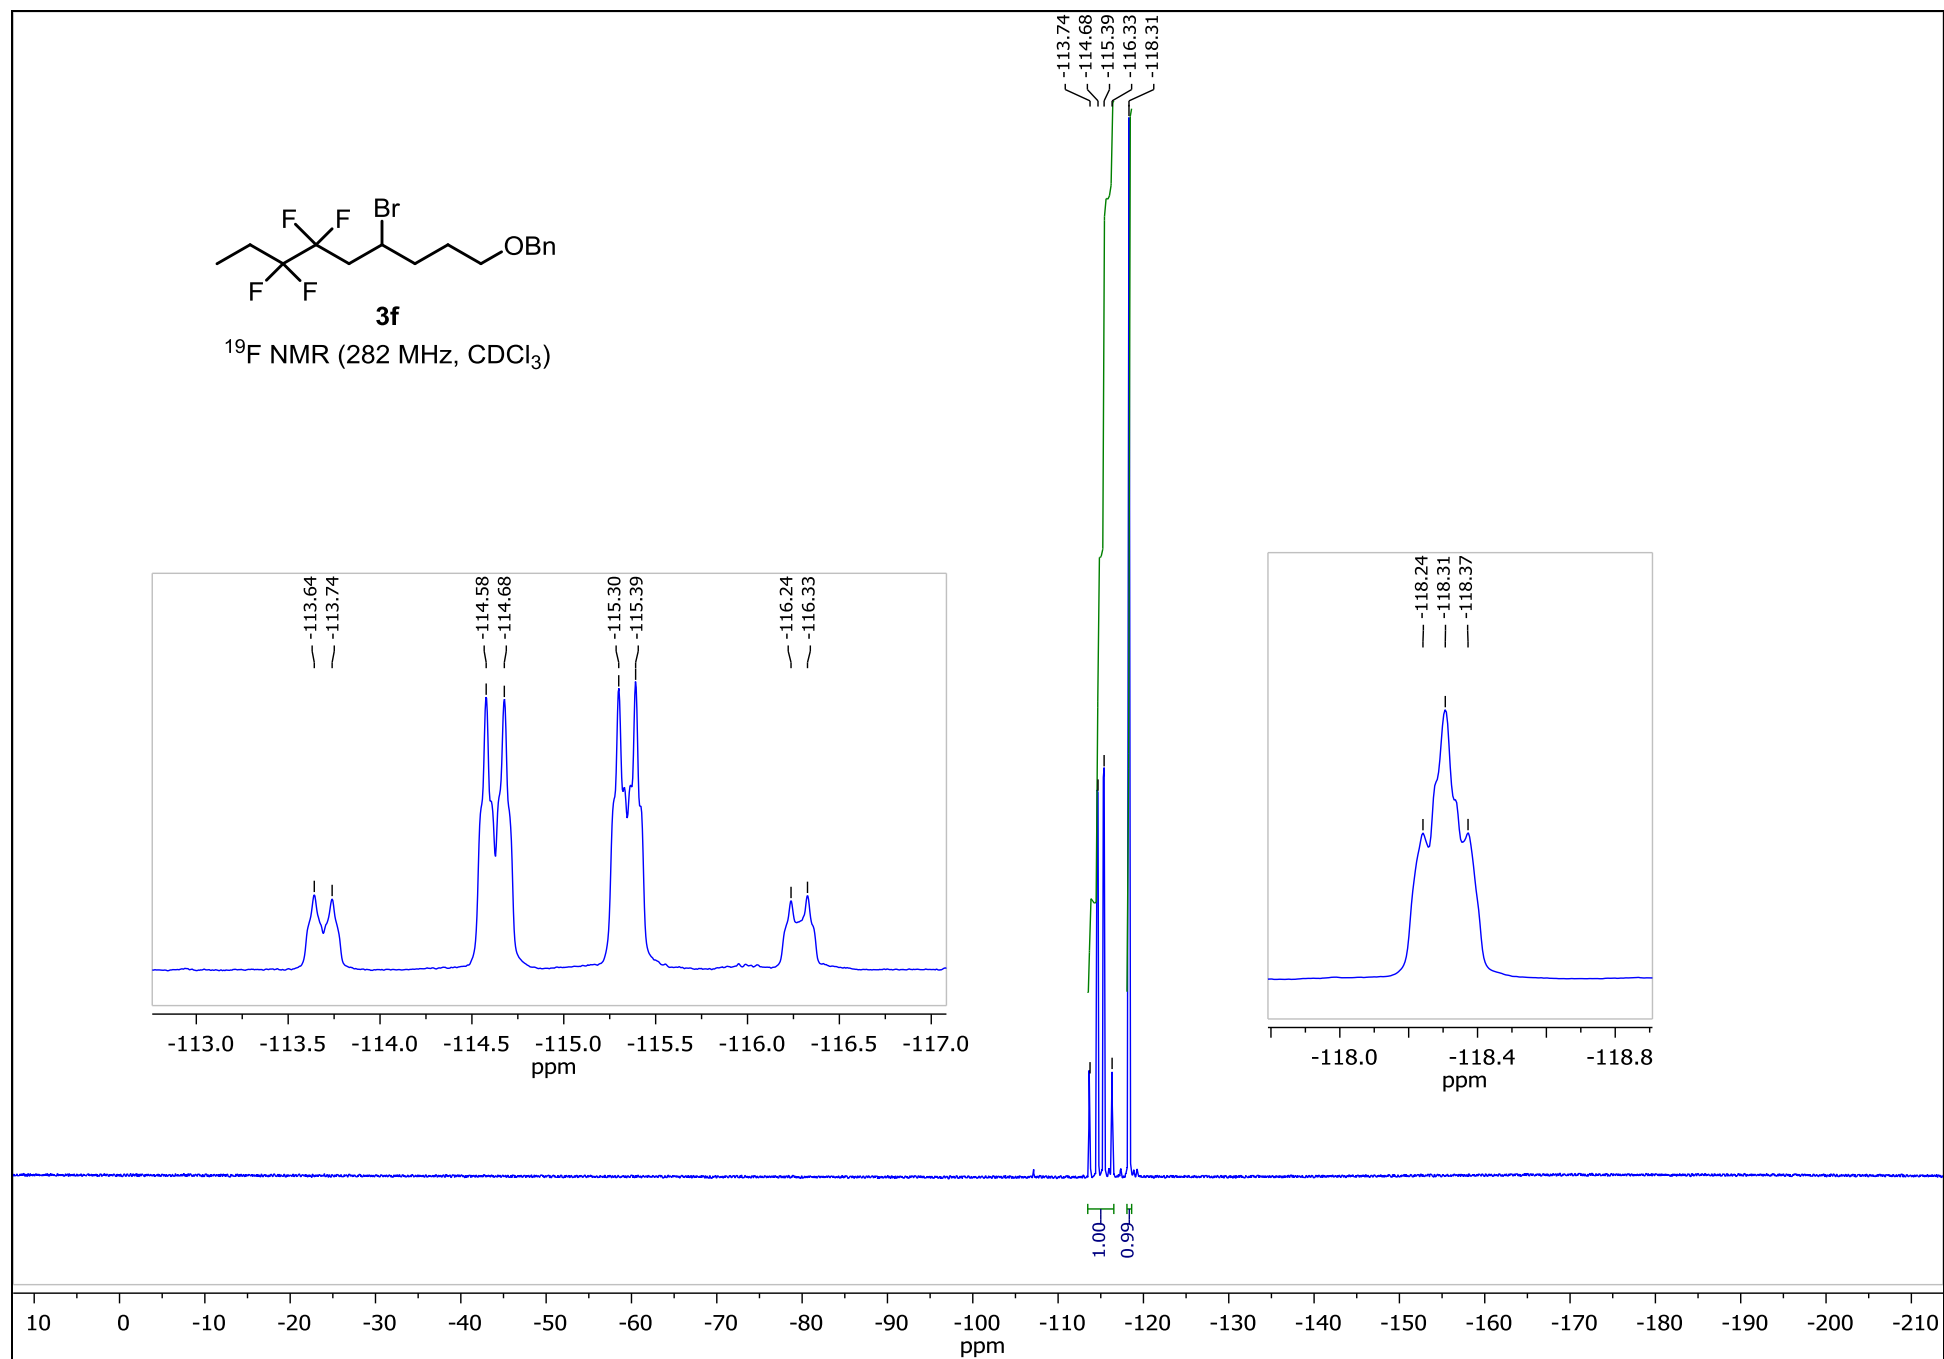

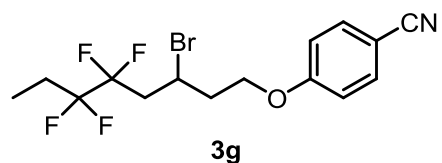

$^1\text{H}$  NMR (300 MHz,  $\text{CDCl}_3$ )

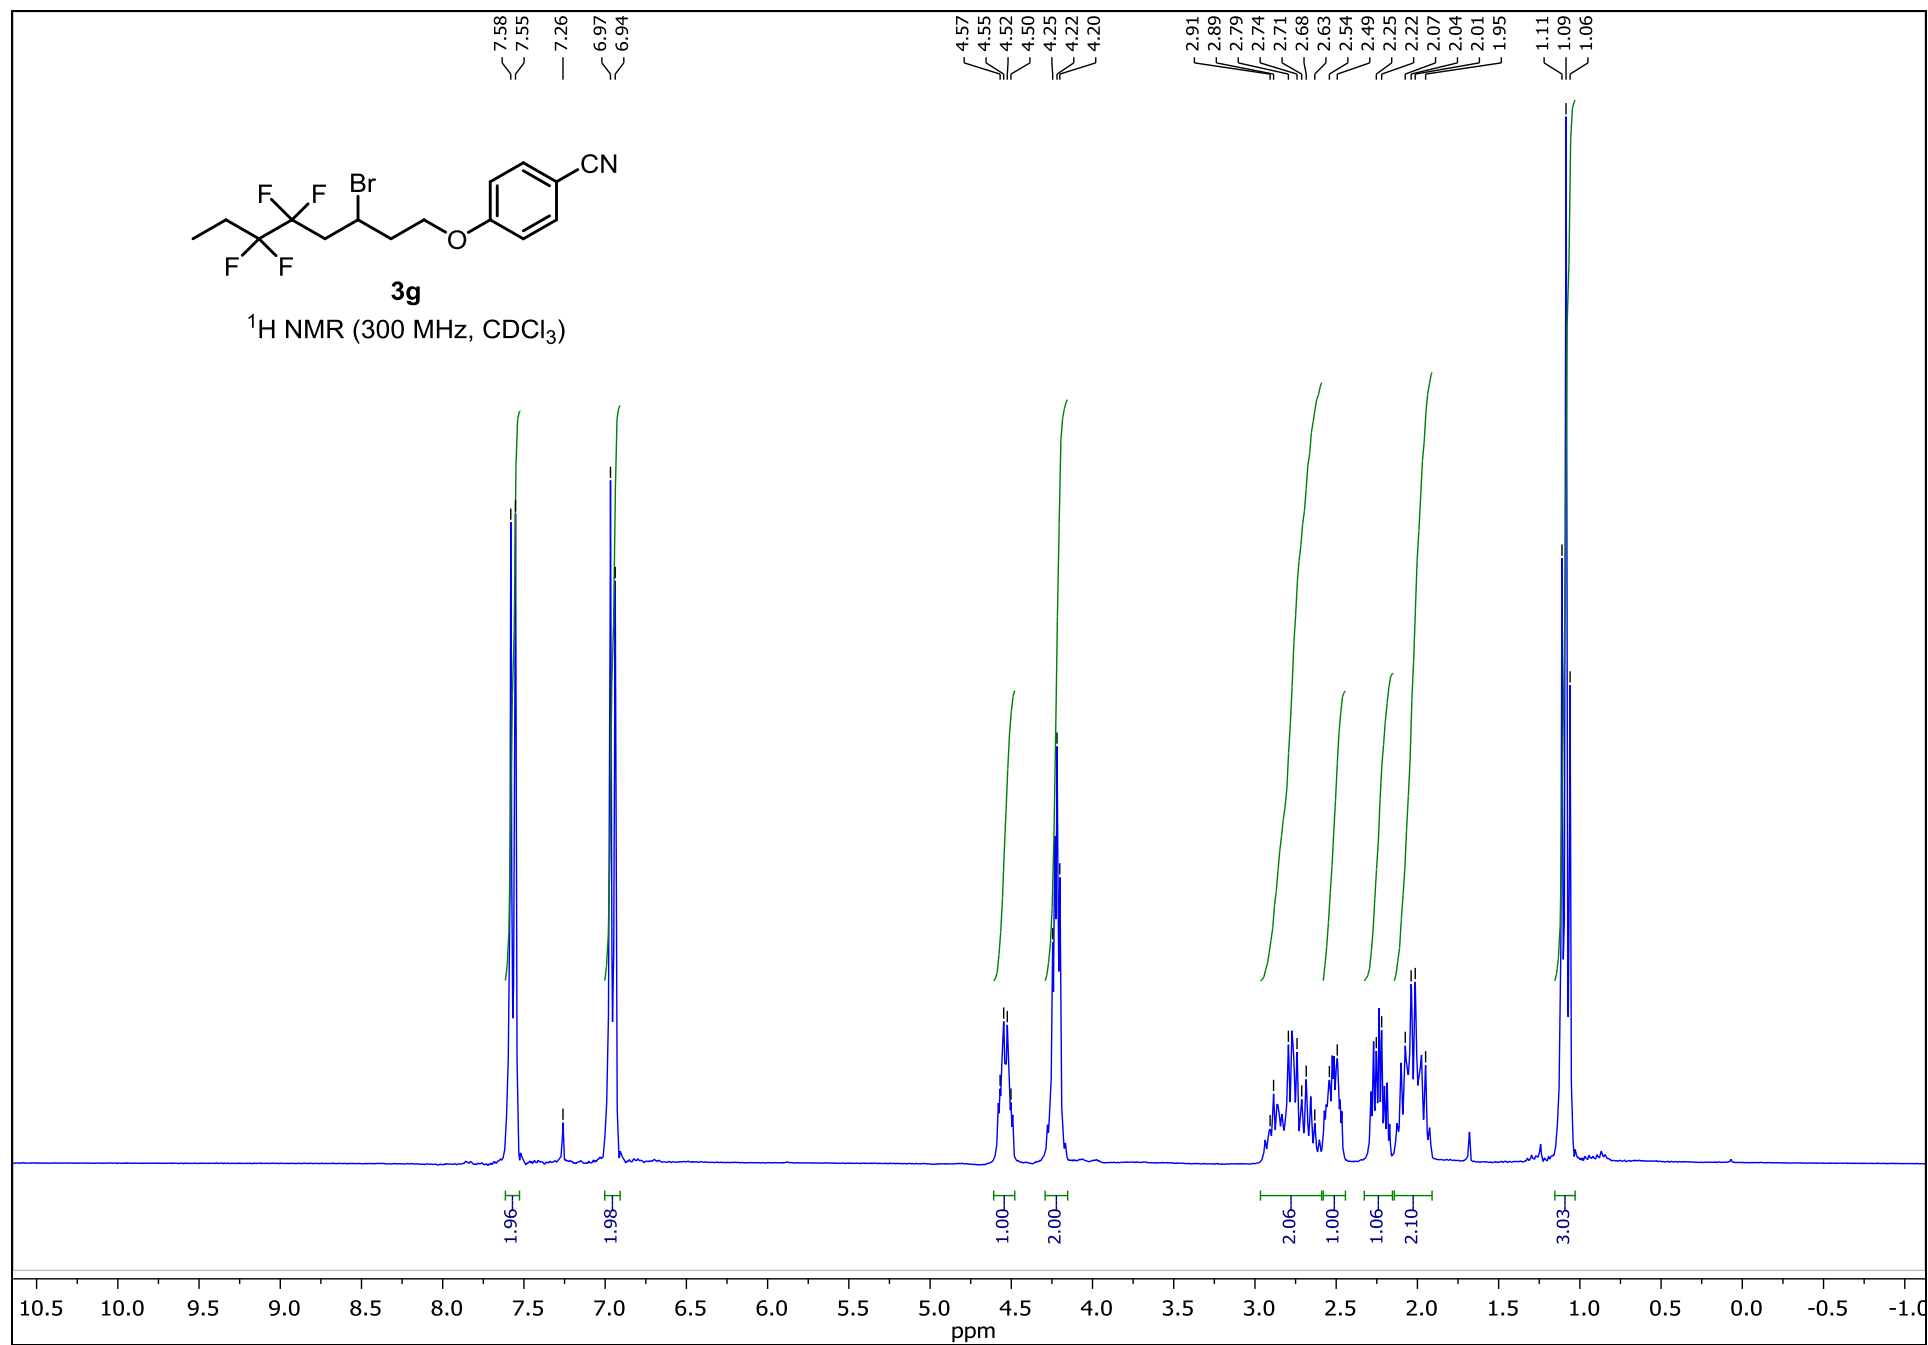

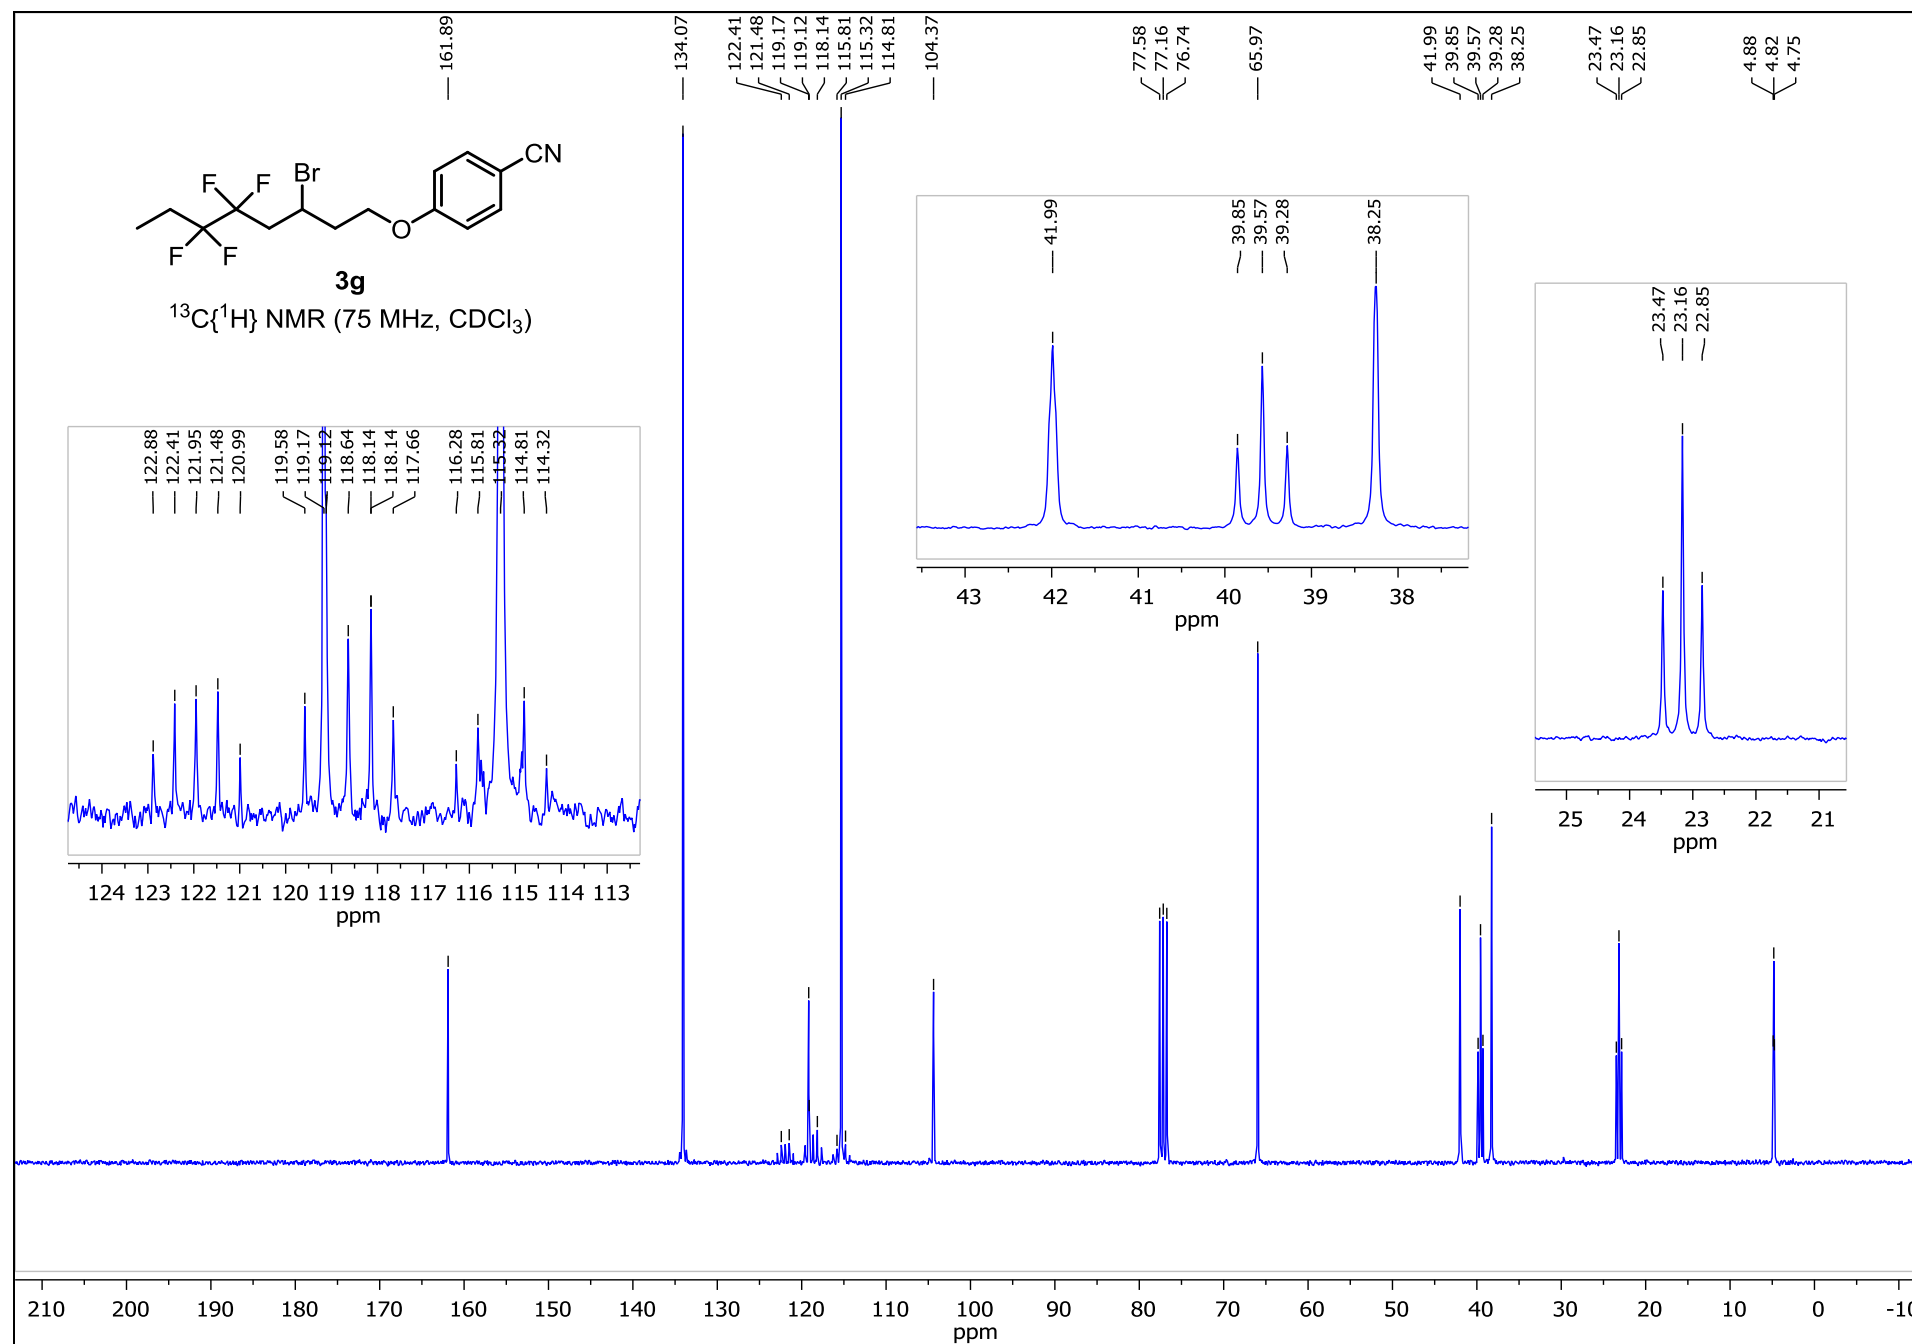

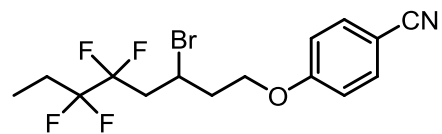**3g**<sup>19</sup>F NMR (282 MHz, CDCl<sub>3</sub>)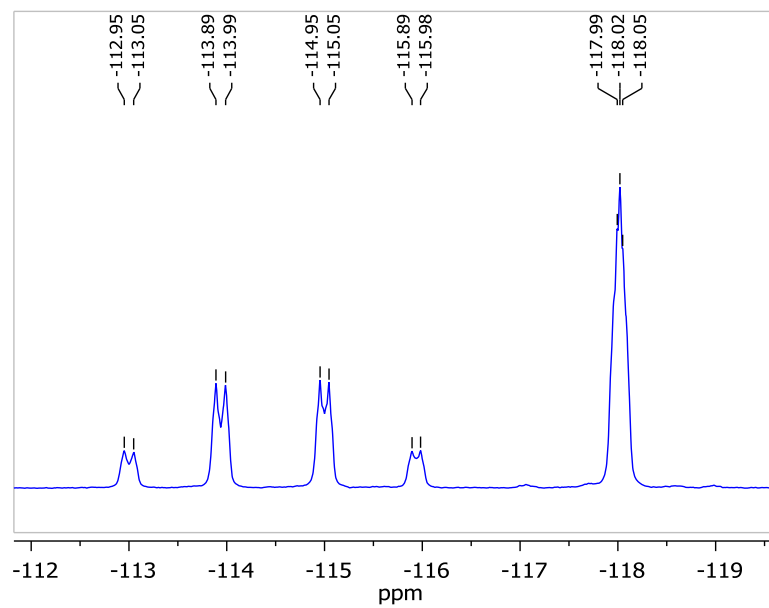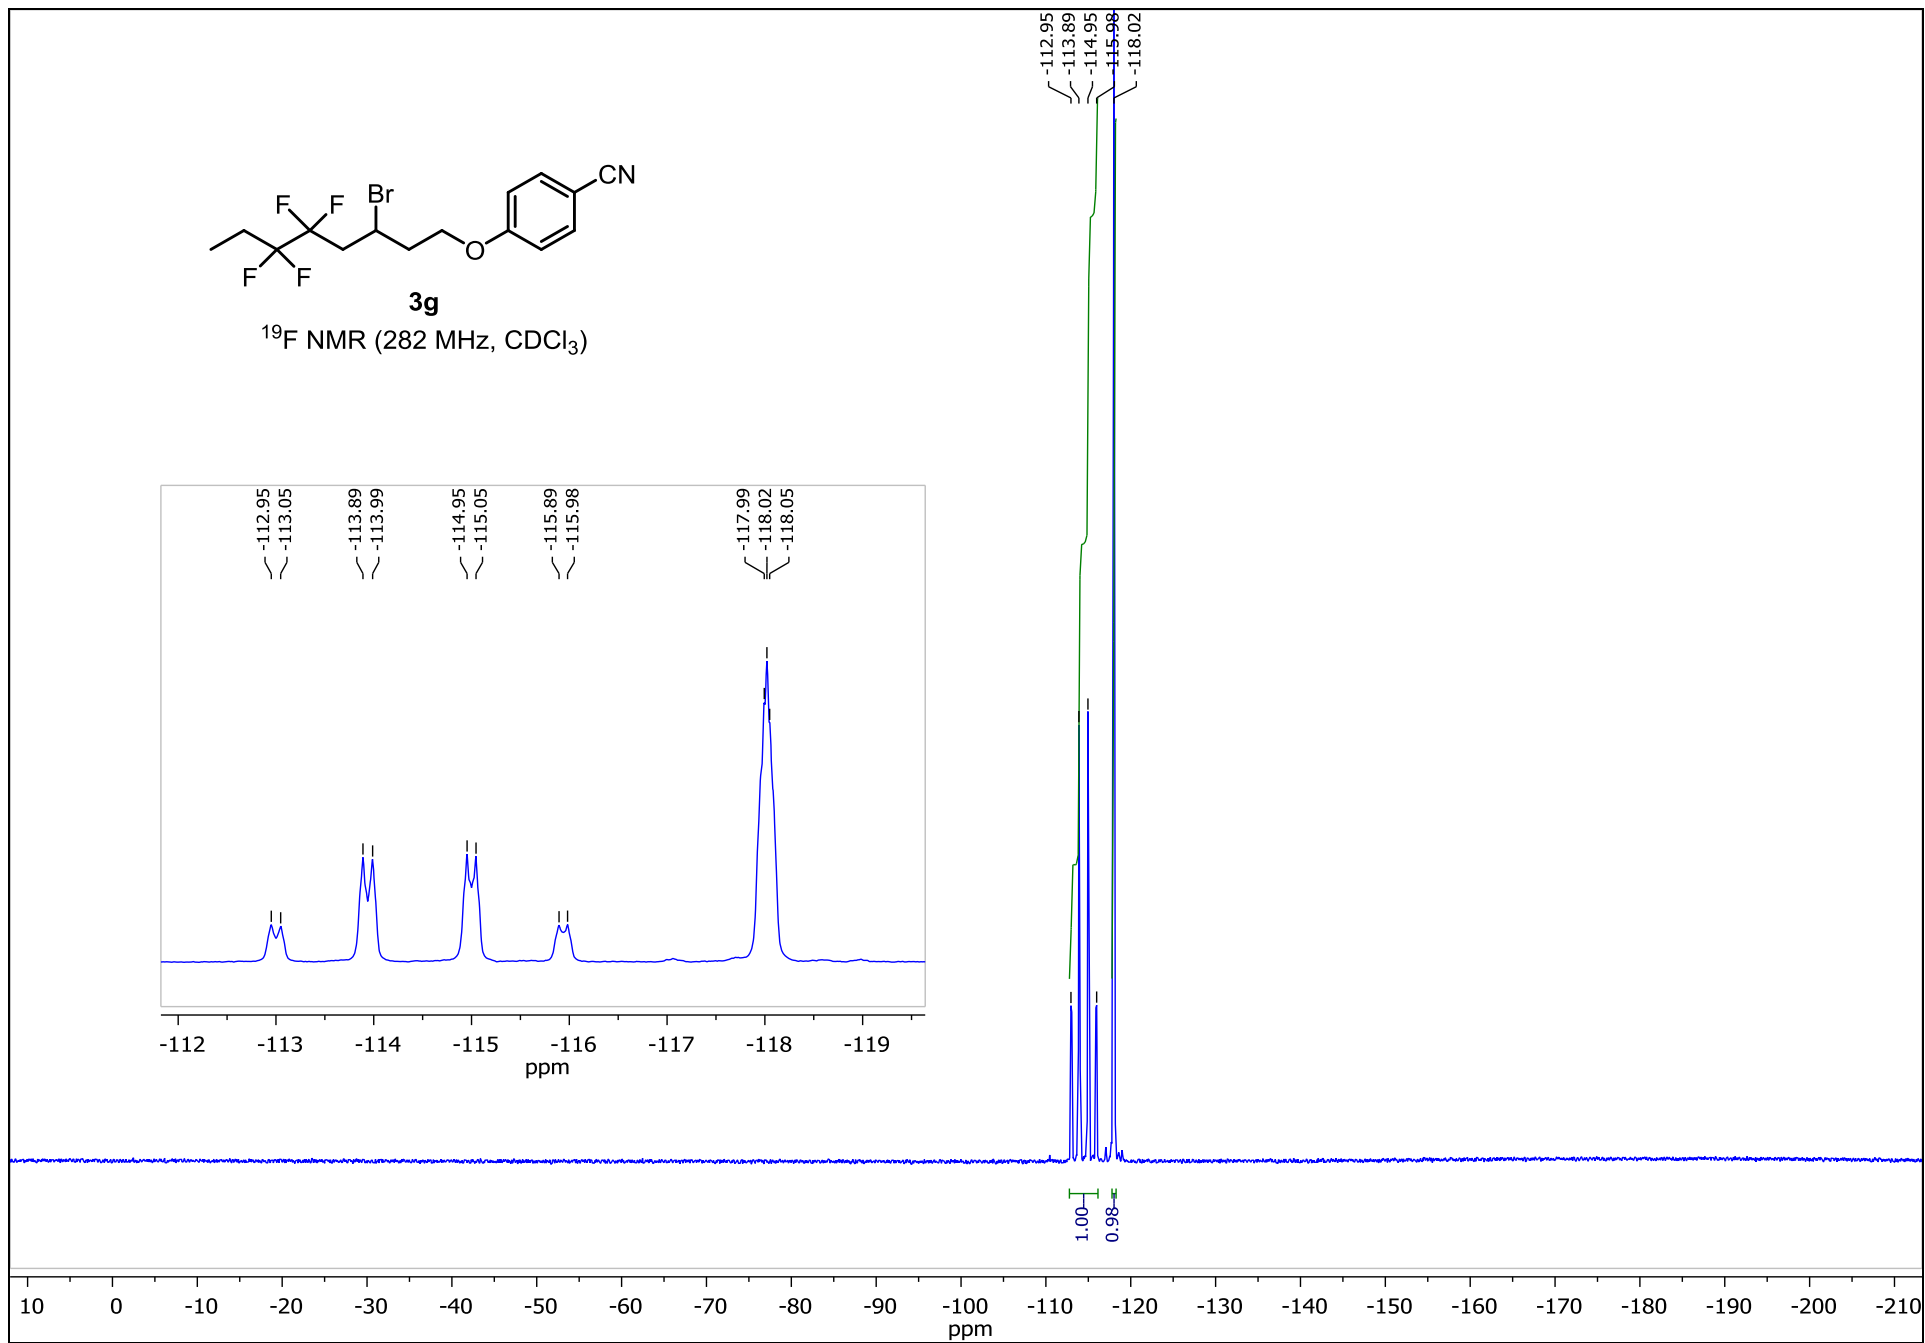

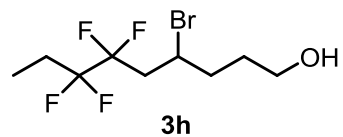

$^1\text{H}$  NMR (300 MHz,  $\text{CDCl}_3$ )

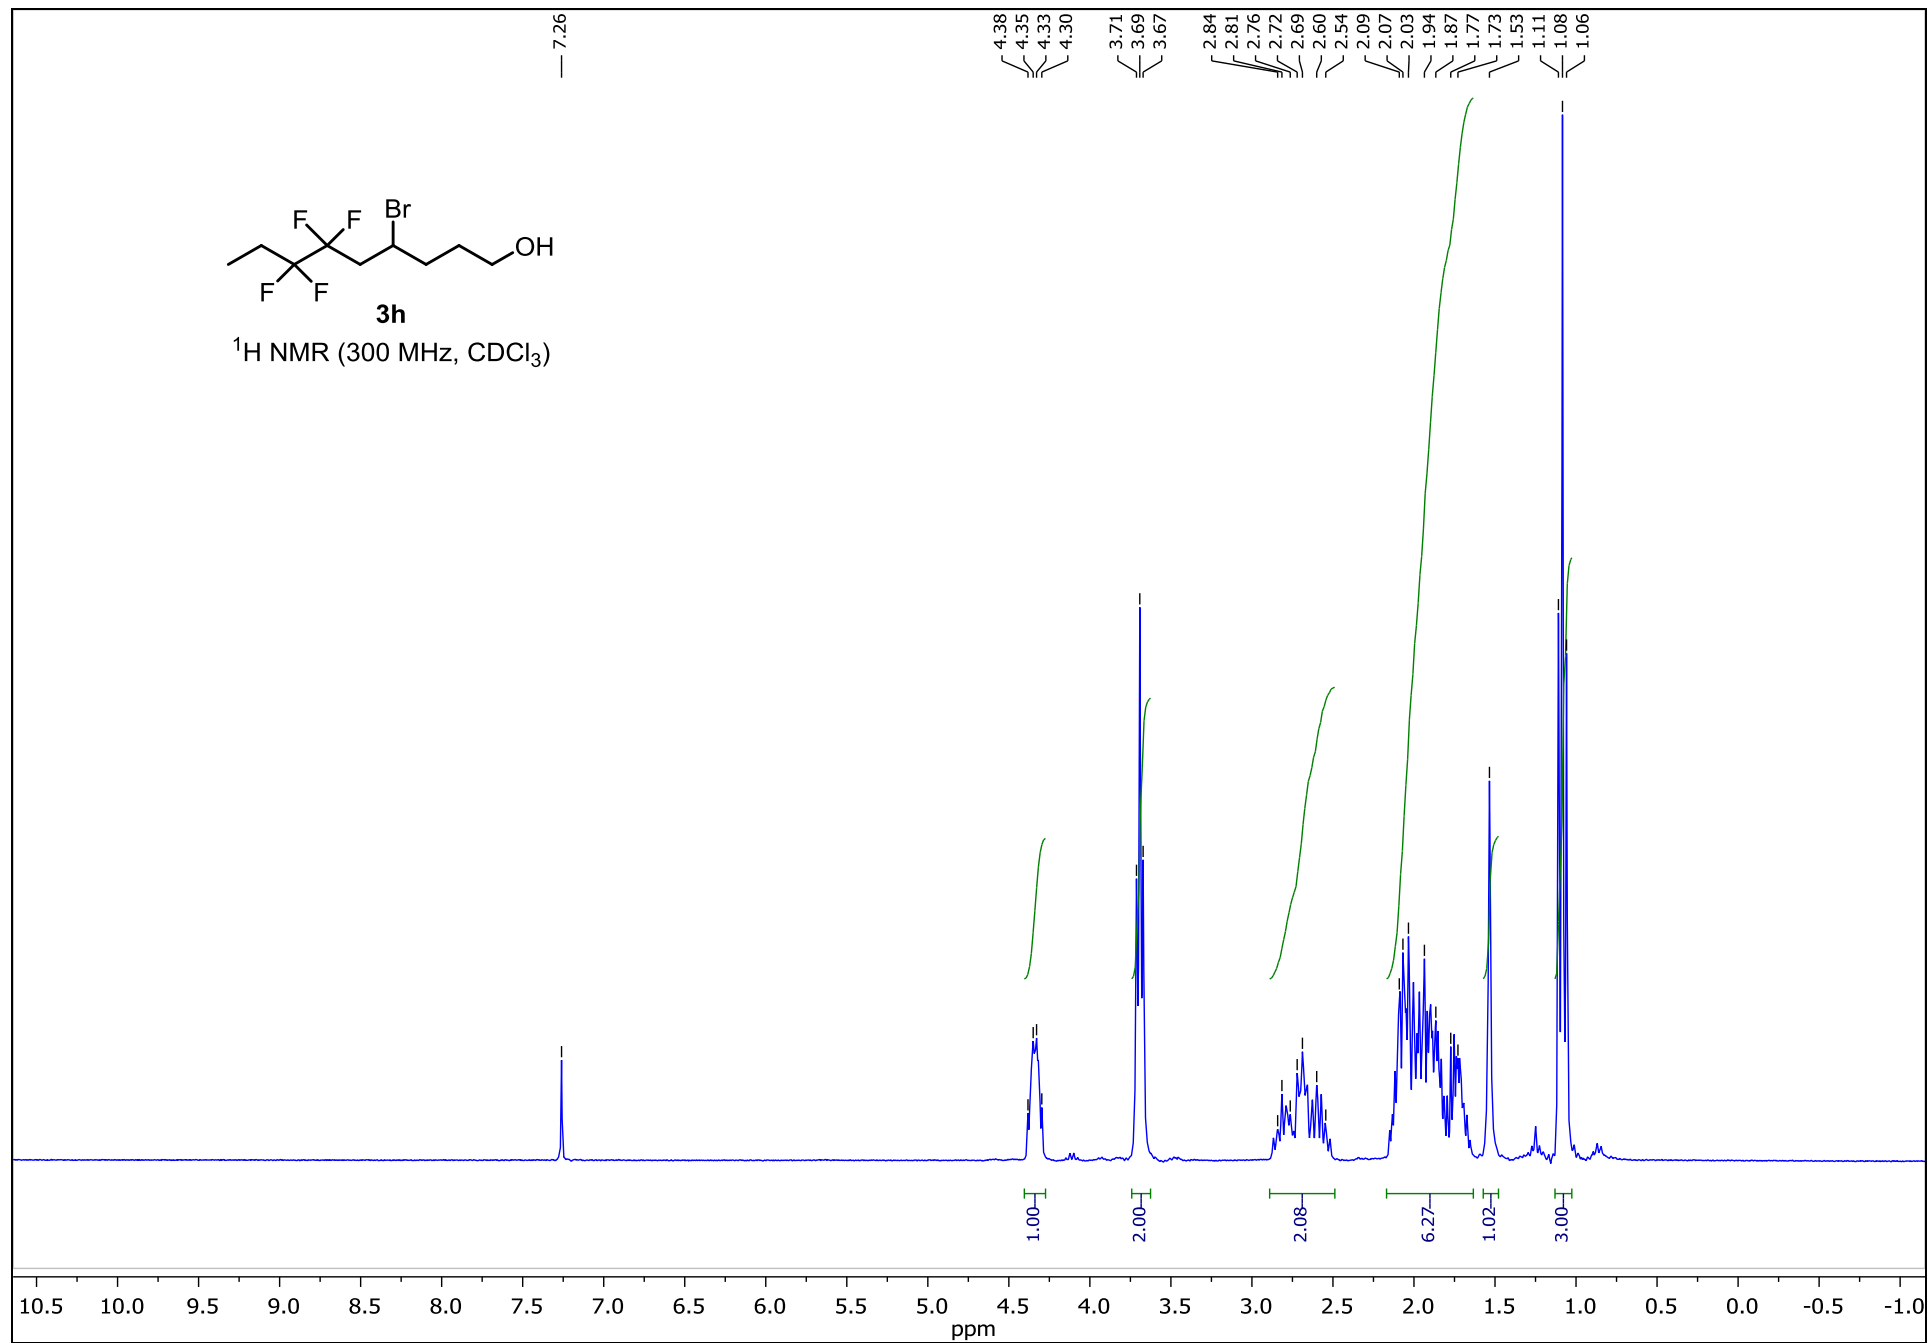

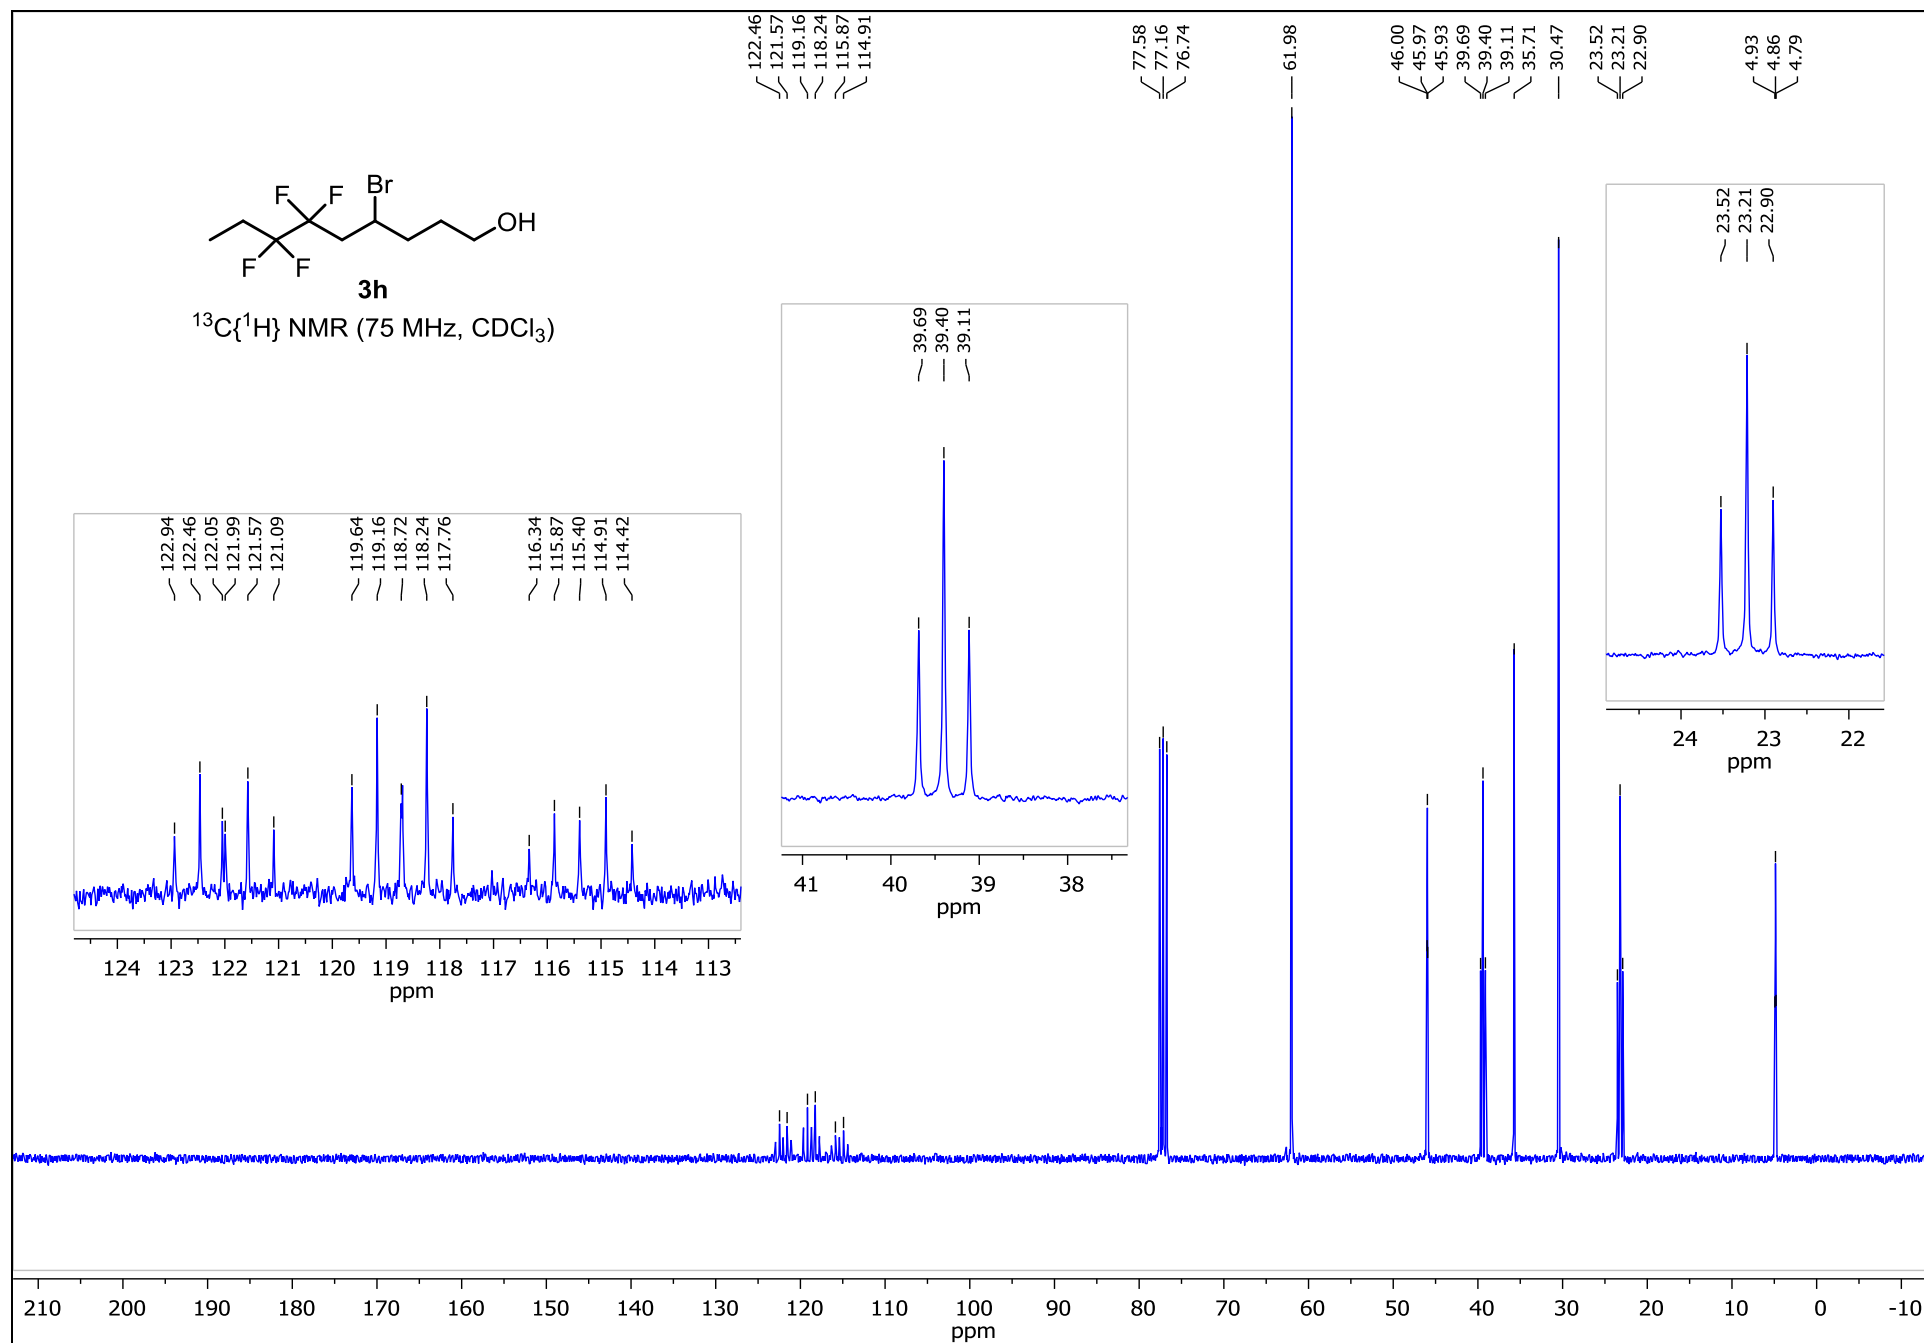

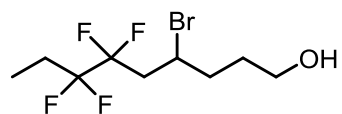

$^{19}\text{F}$  NMR (282 MHz,  $\text{CDCl}_3$ )

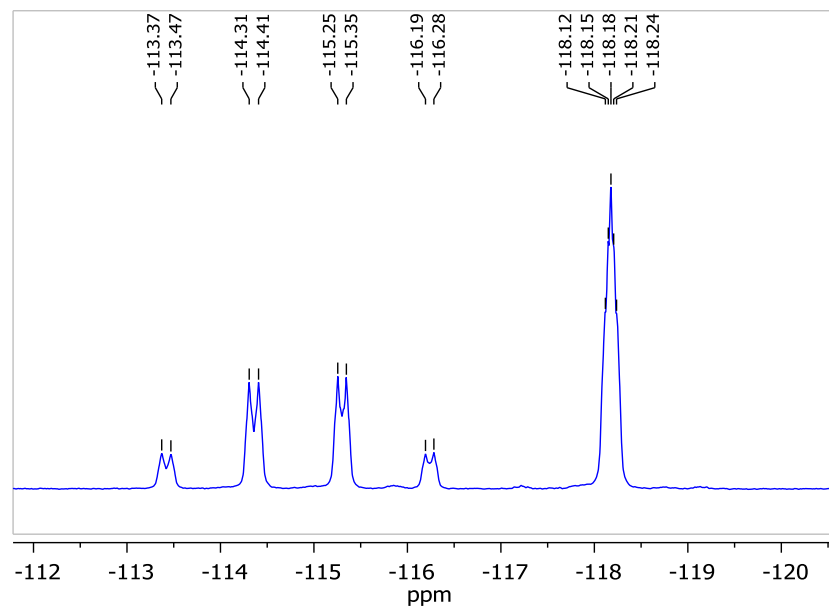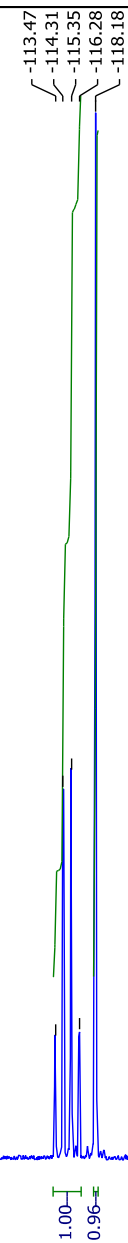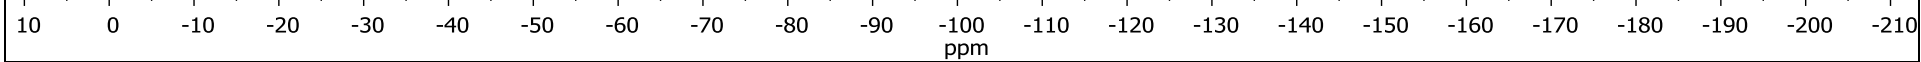



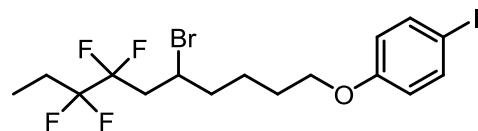**3i** $^1\text{H}$  NMR (300 MHz,  $\text{CDCl}_3$ )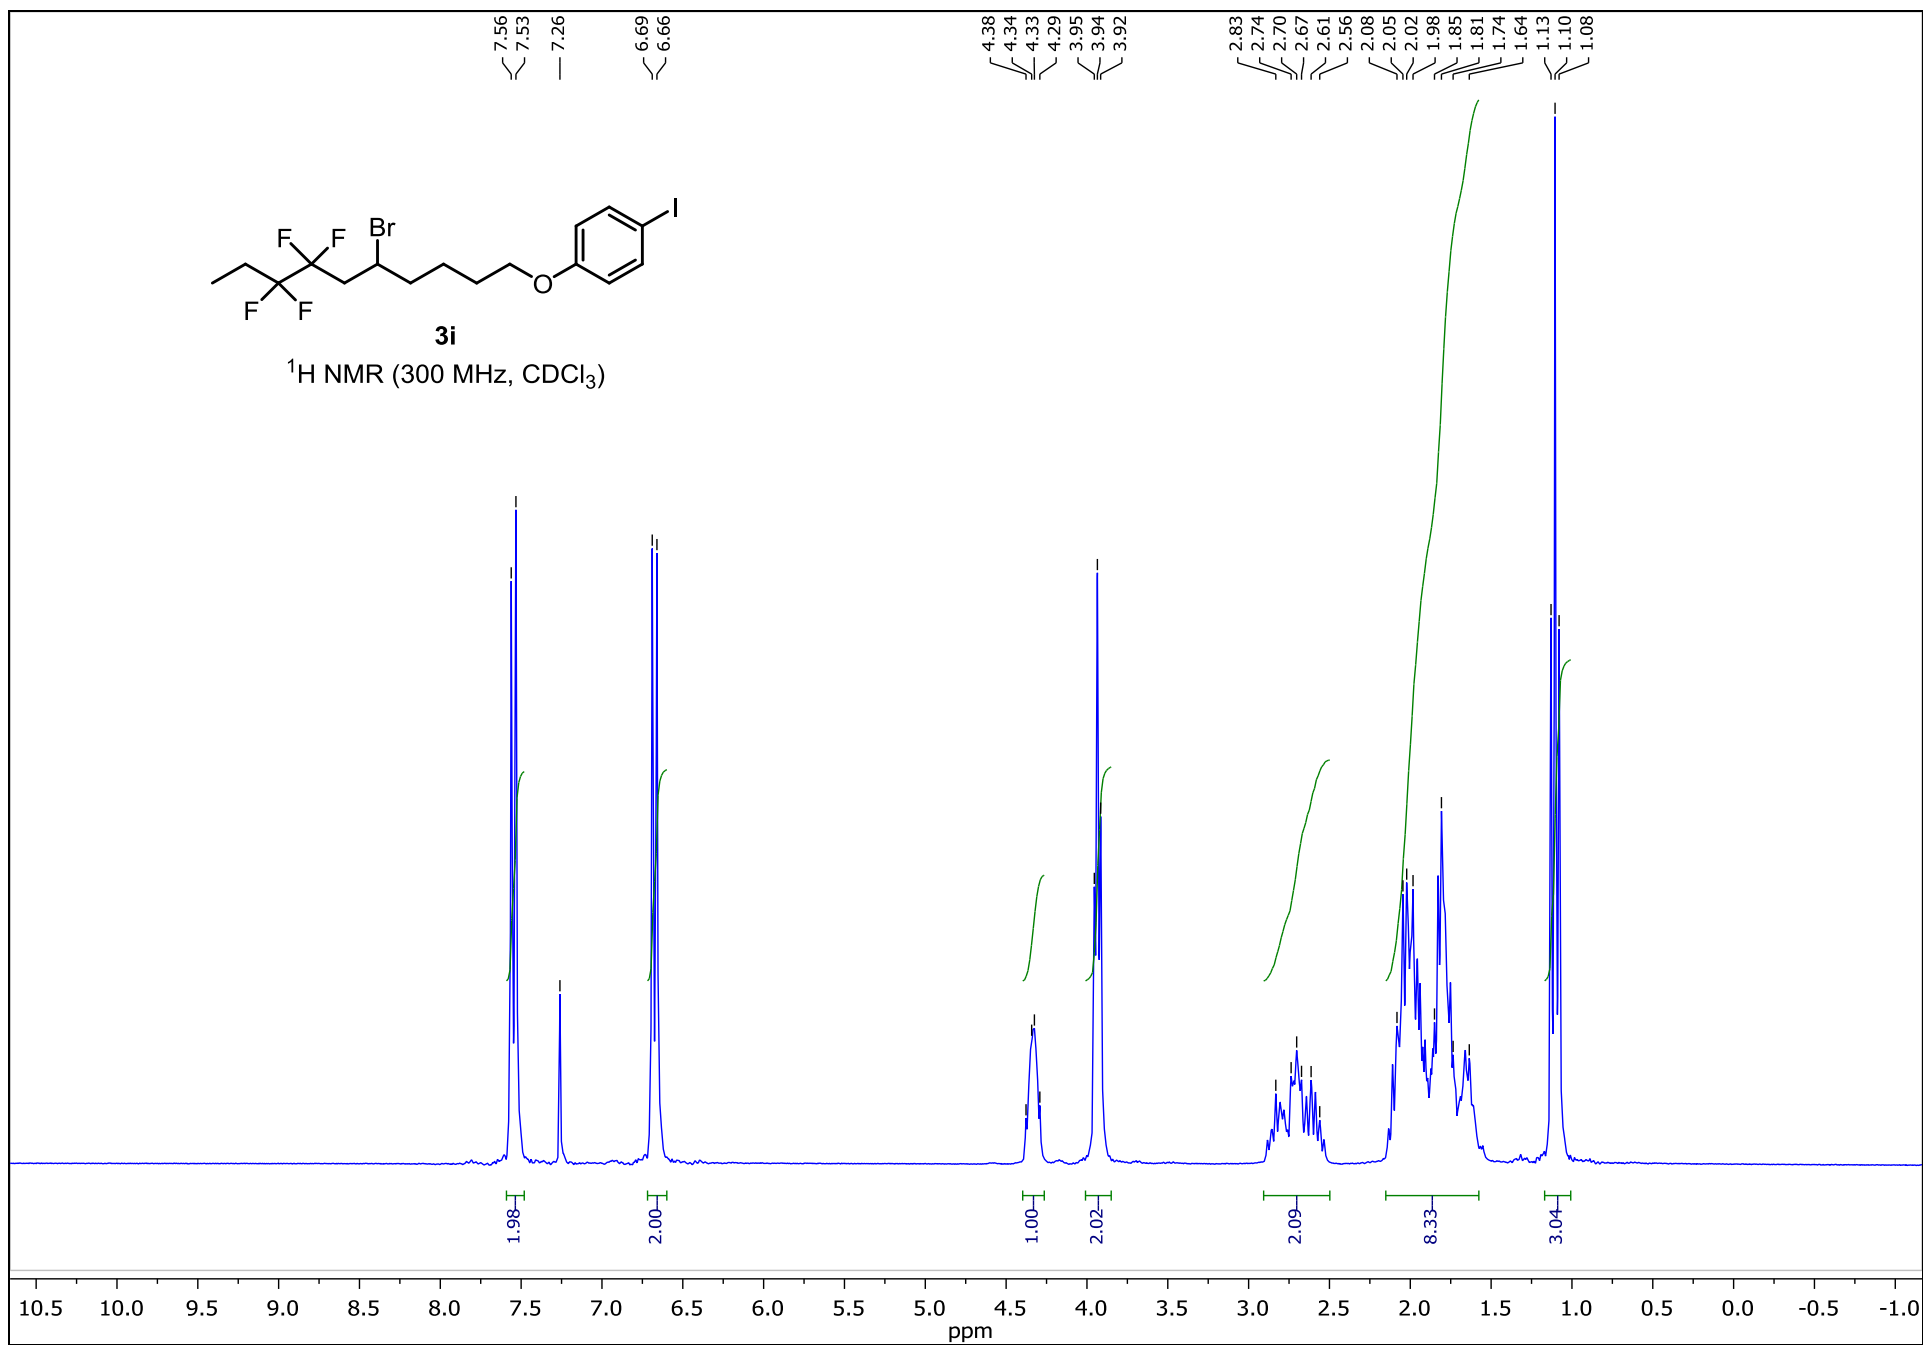

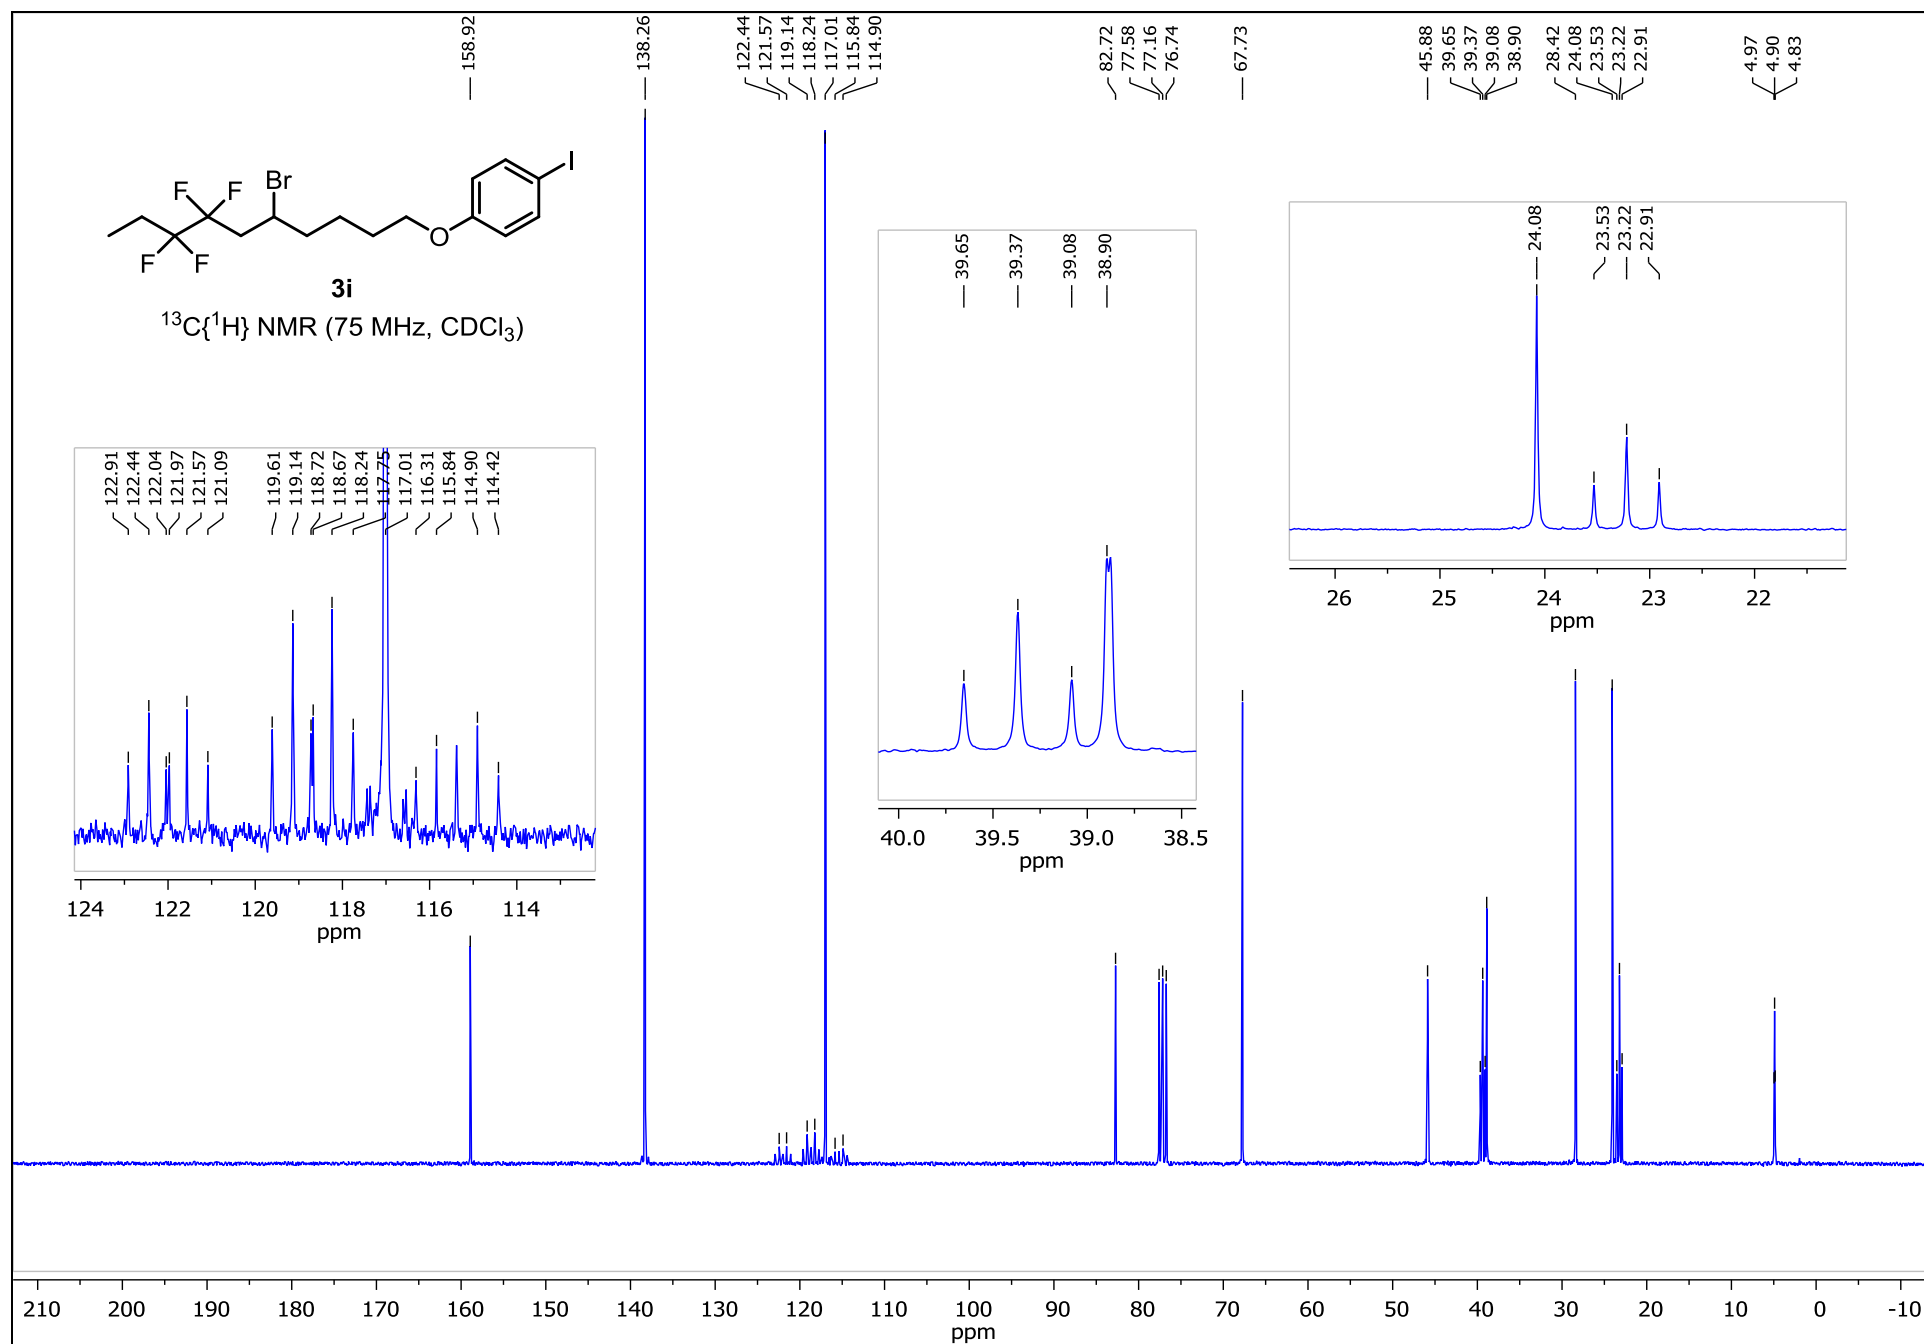

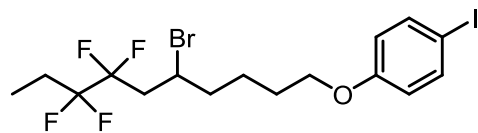**3i** $^{19}\text{F}$  NMR (282 MHz,  $\text{CDCl}_3$ )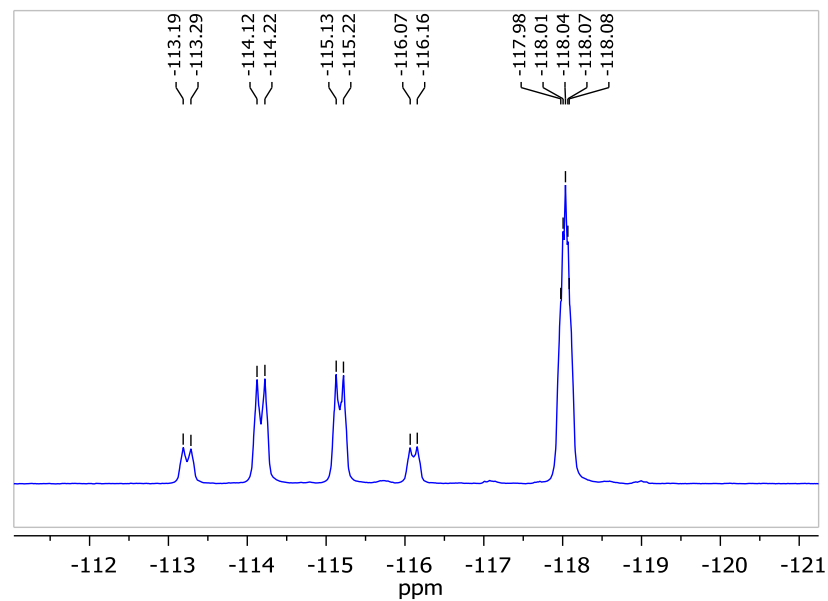

Peak labels (ppm):

- 113.19, -114.22, -115.13, -116.16, -118.04

Integrations:

- 1.00
- 0.95

Chemical shift range: 10 to -210 ppm.

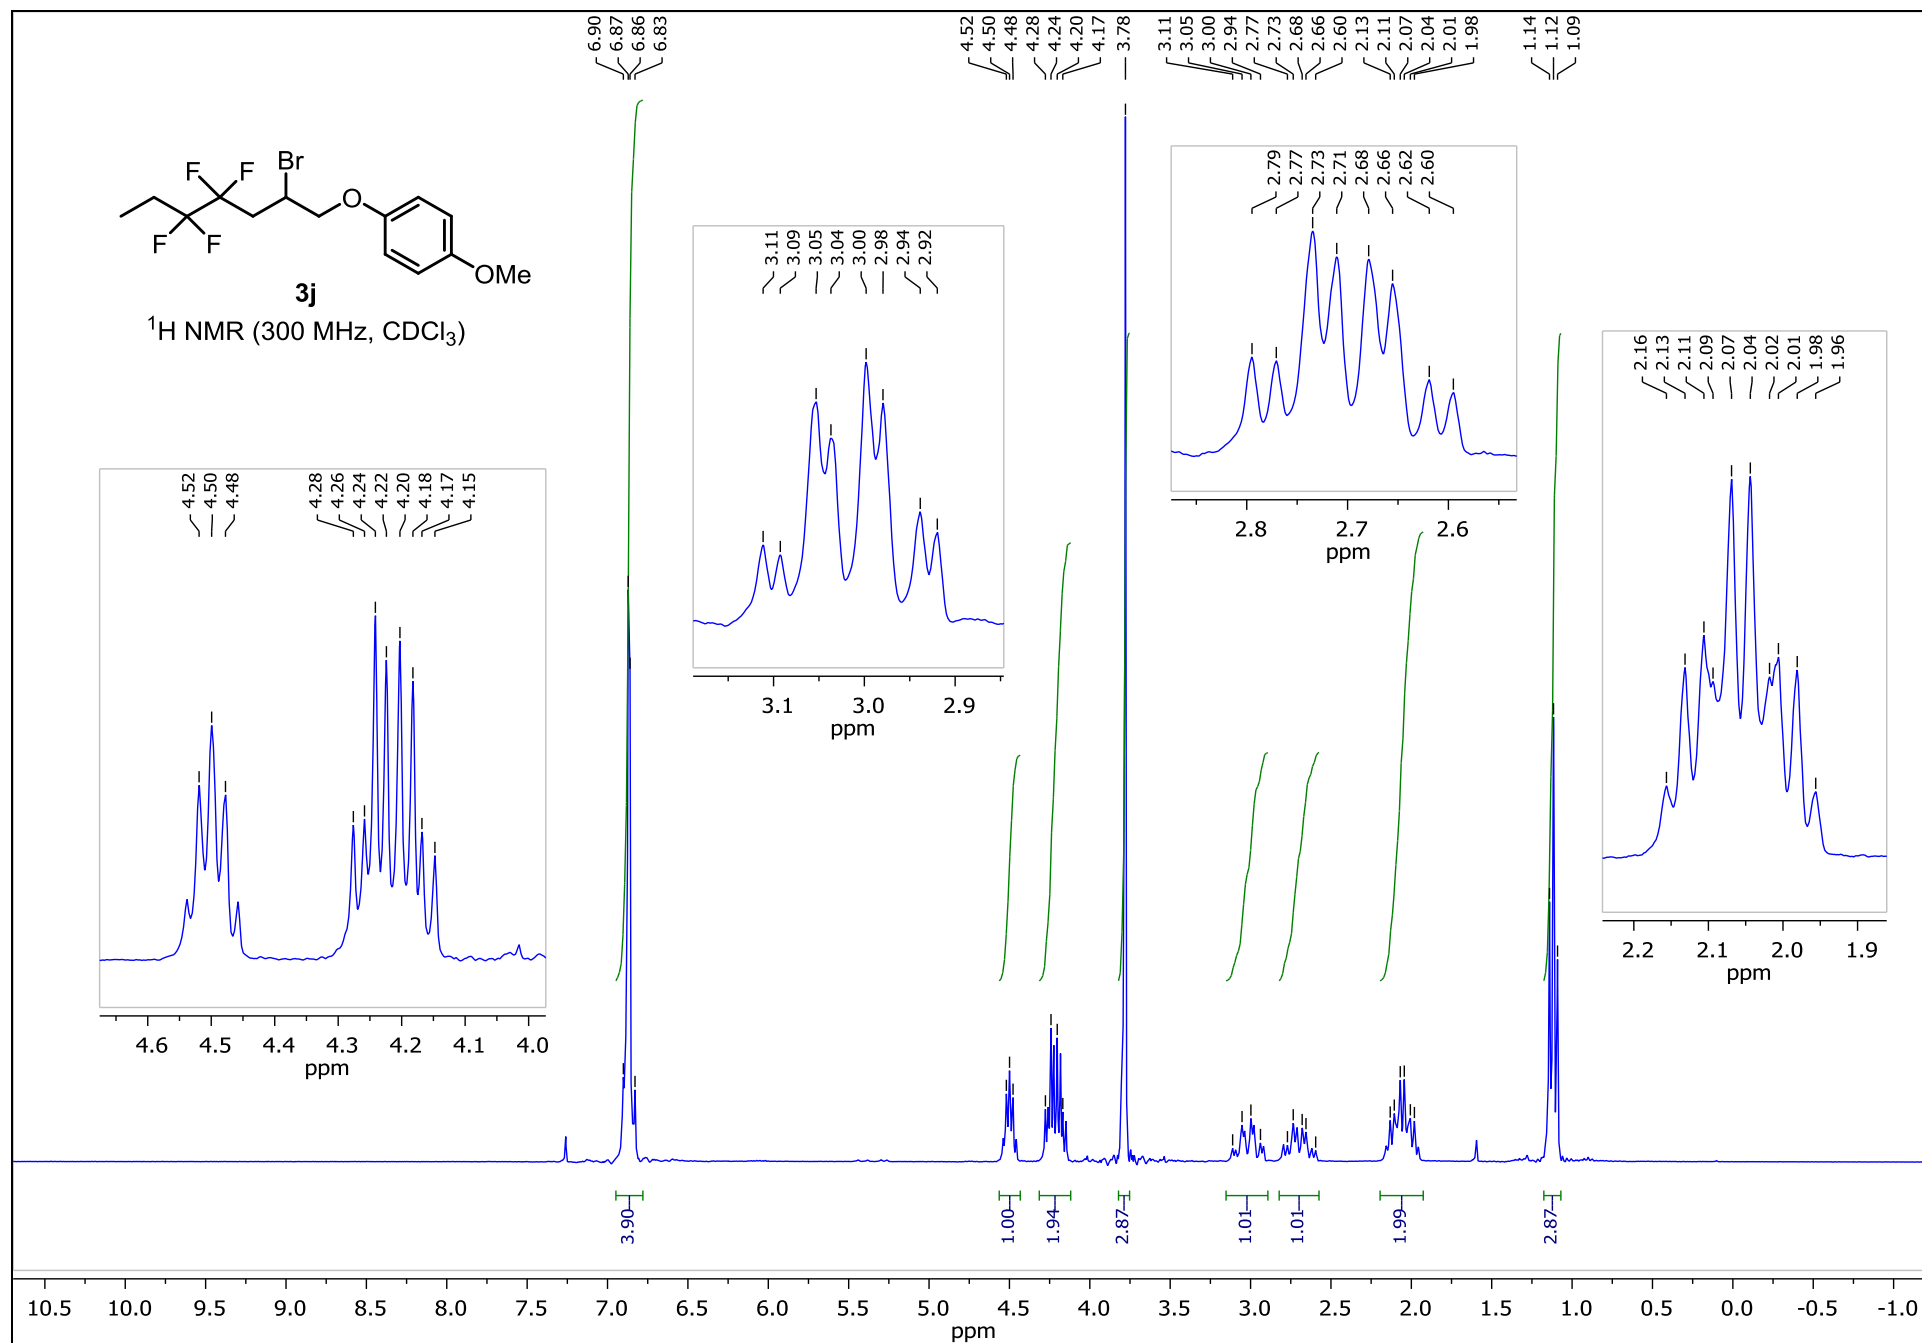

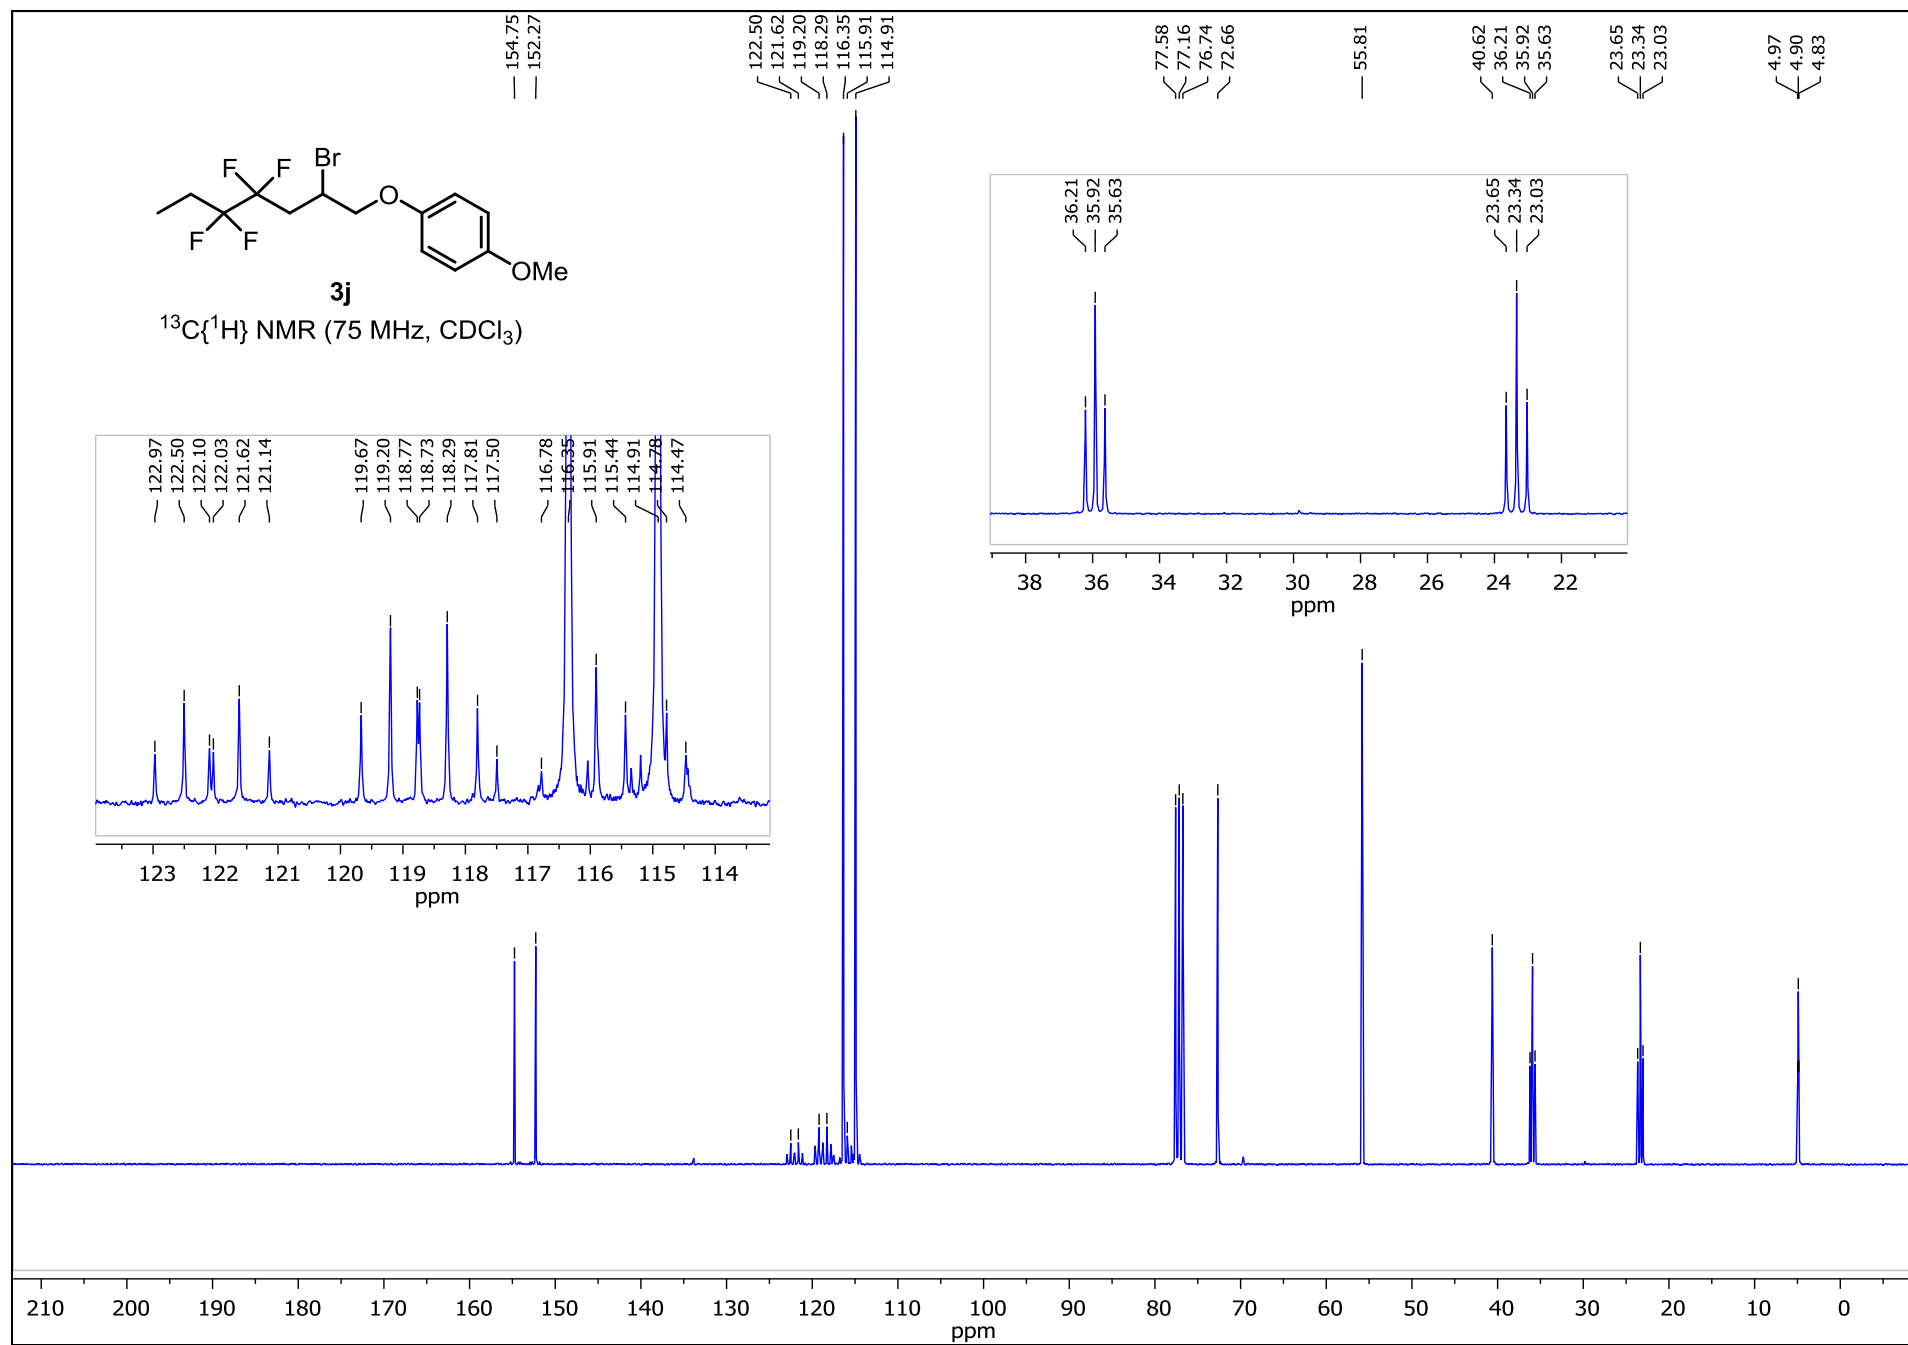

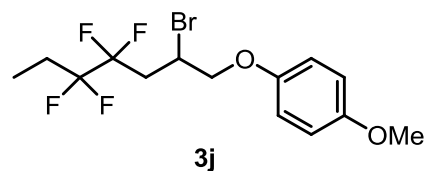

$^{19}\text{F}$  NMR (282 MHz,  $\text{CDCl}_3$ )

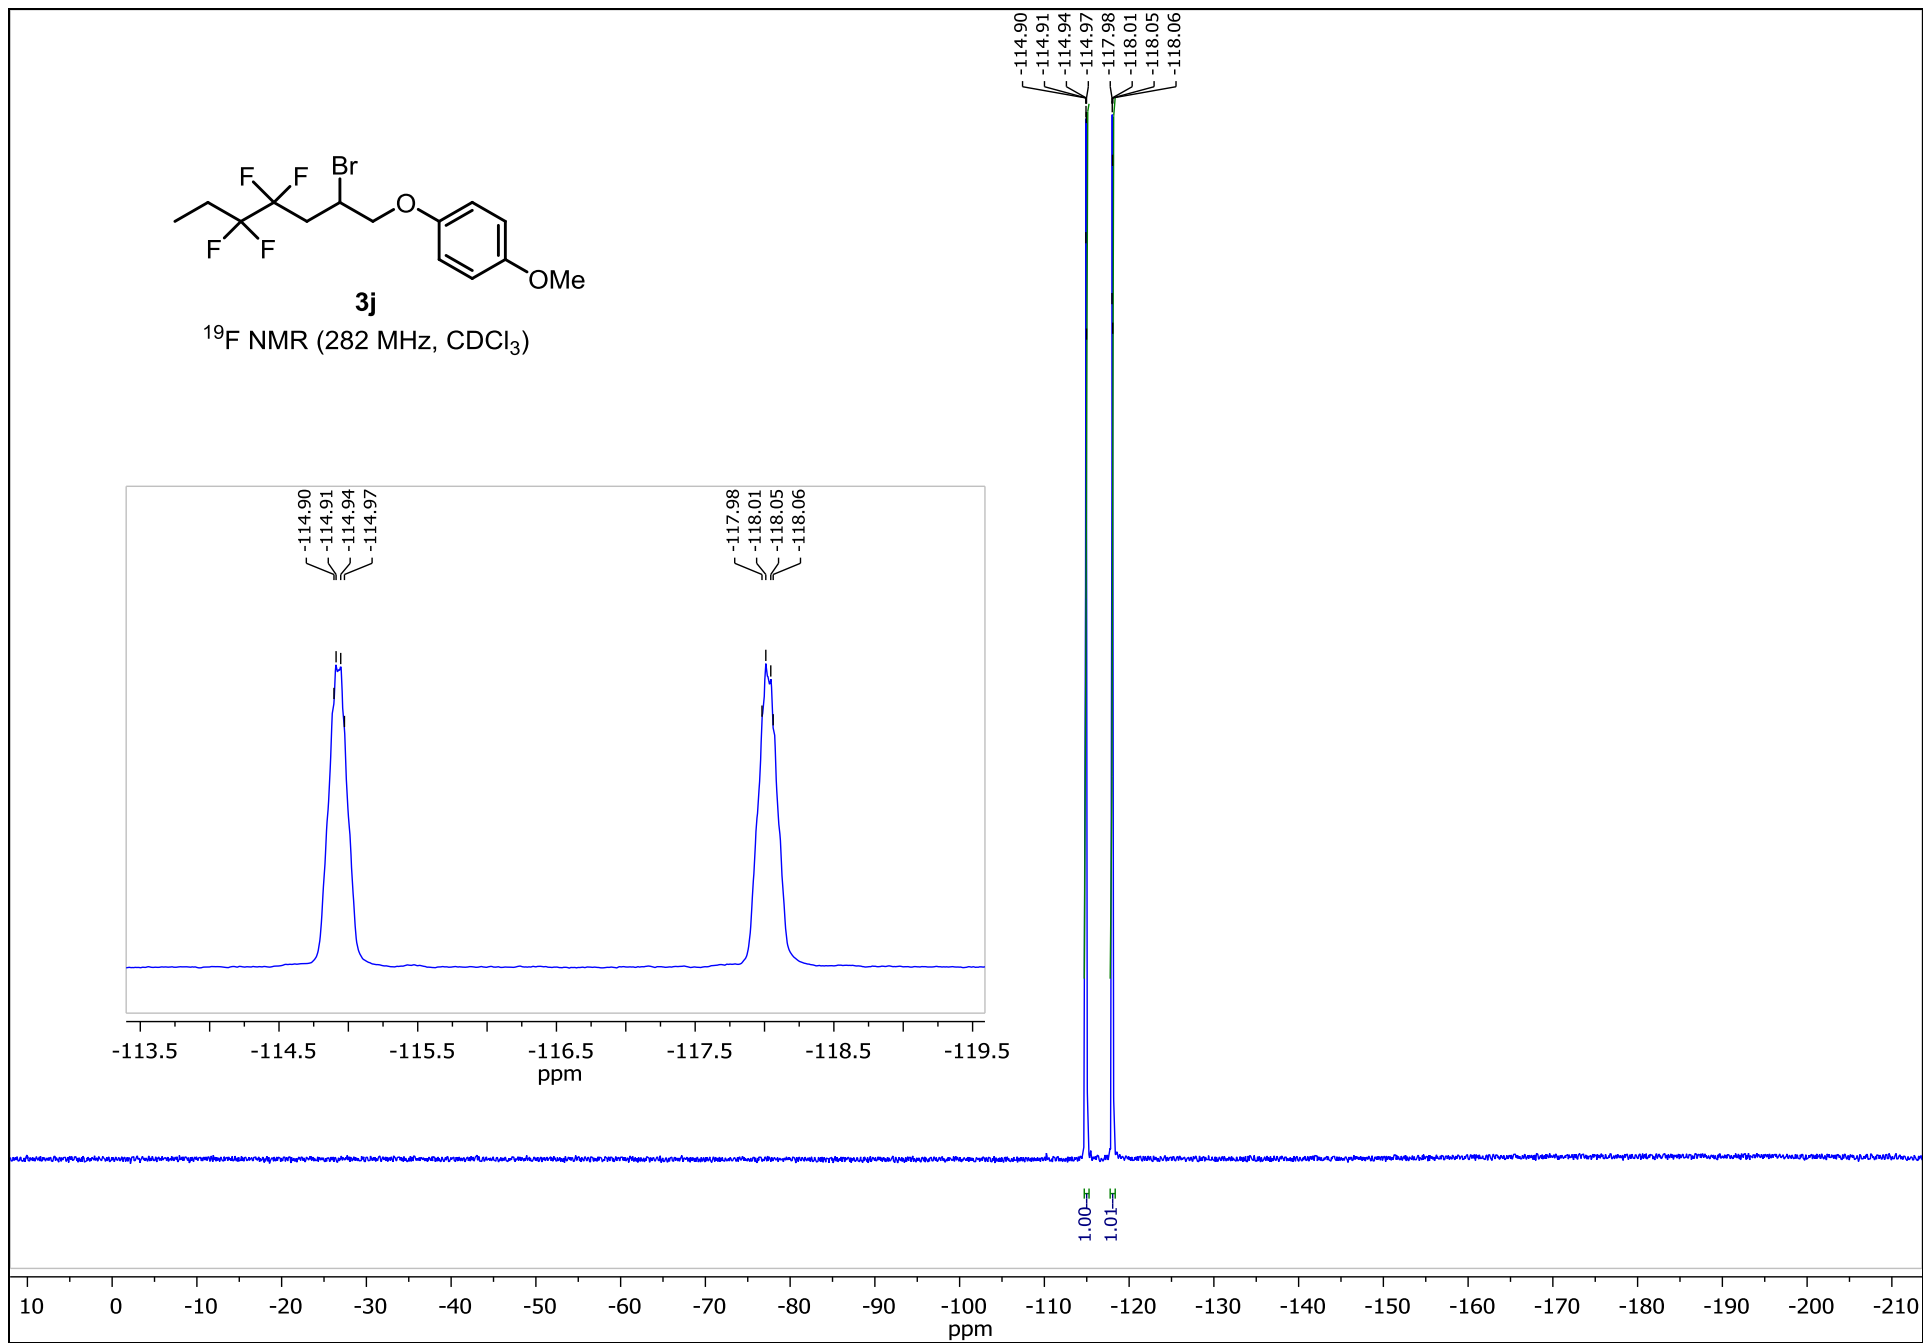

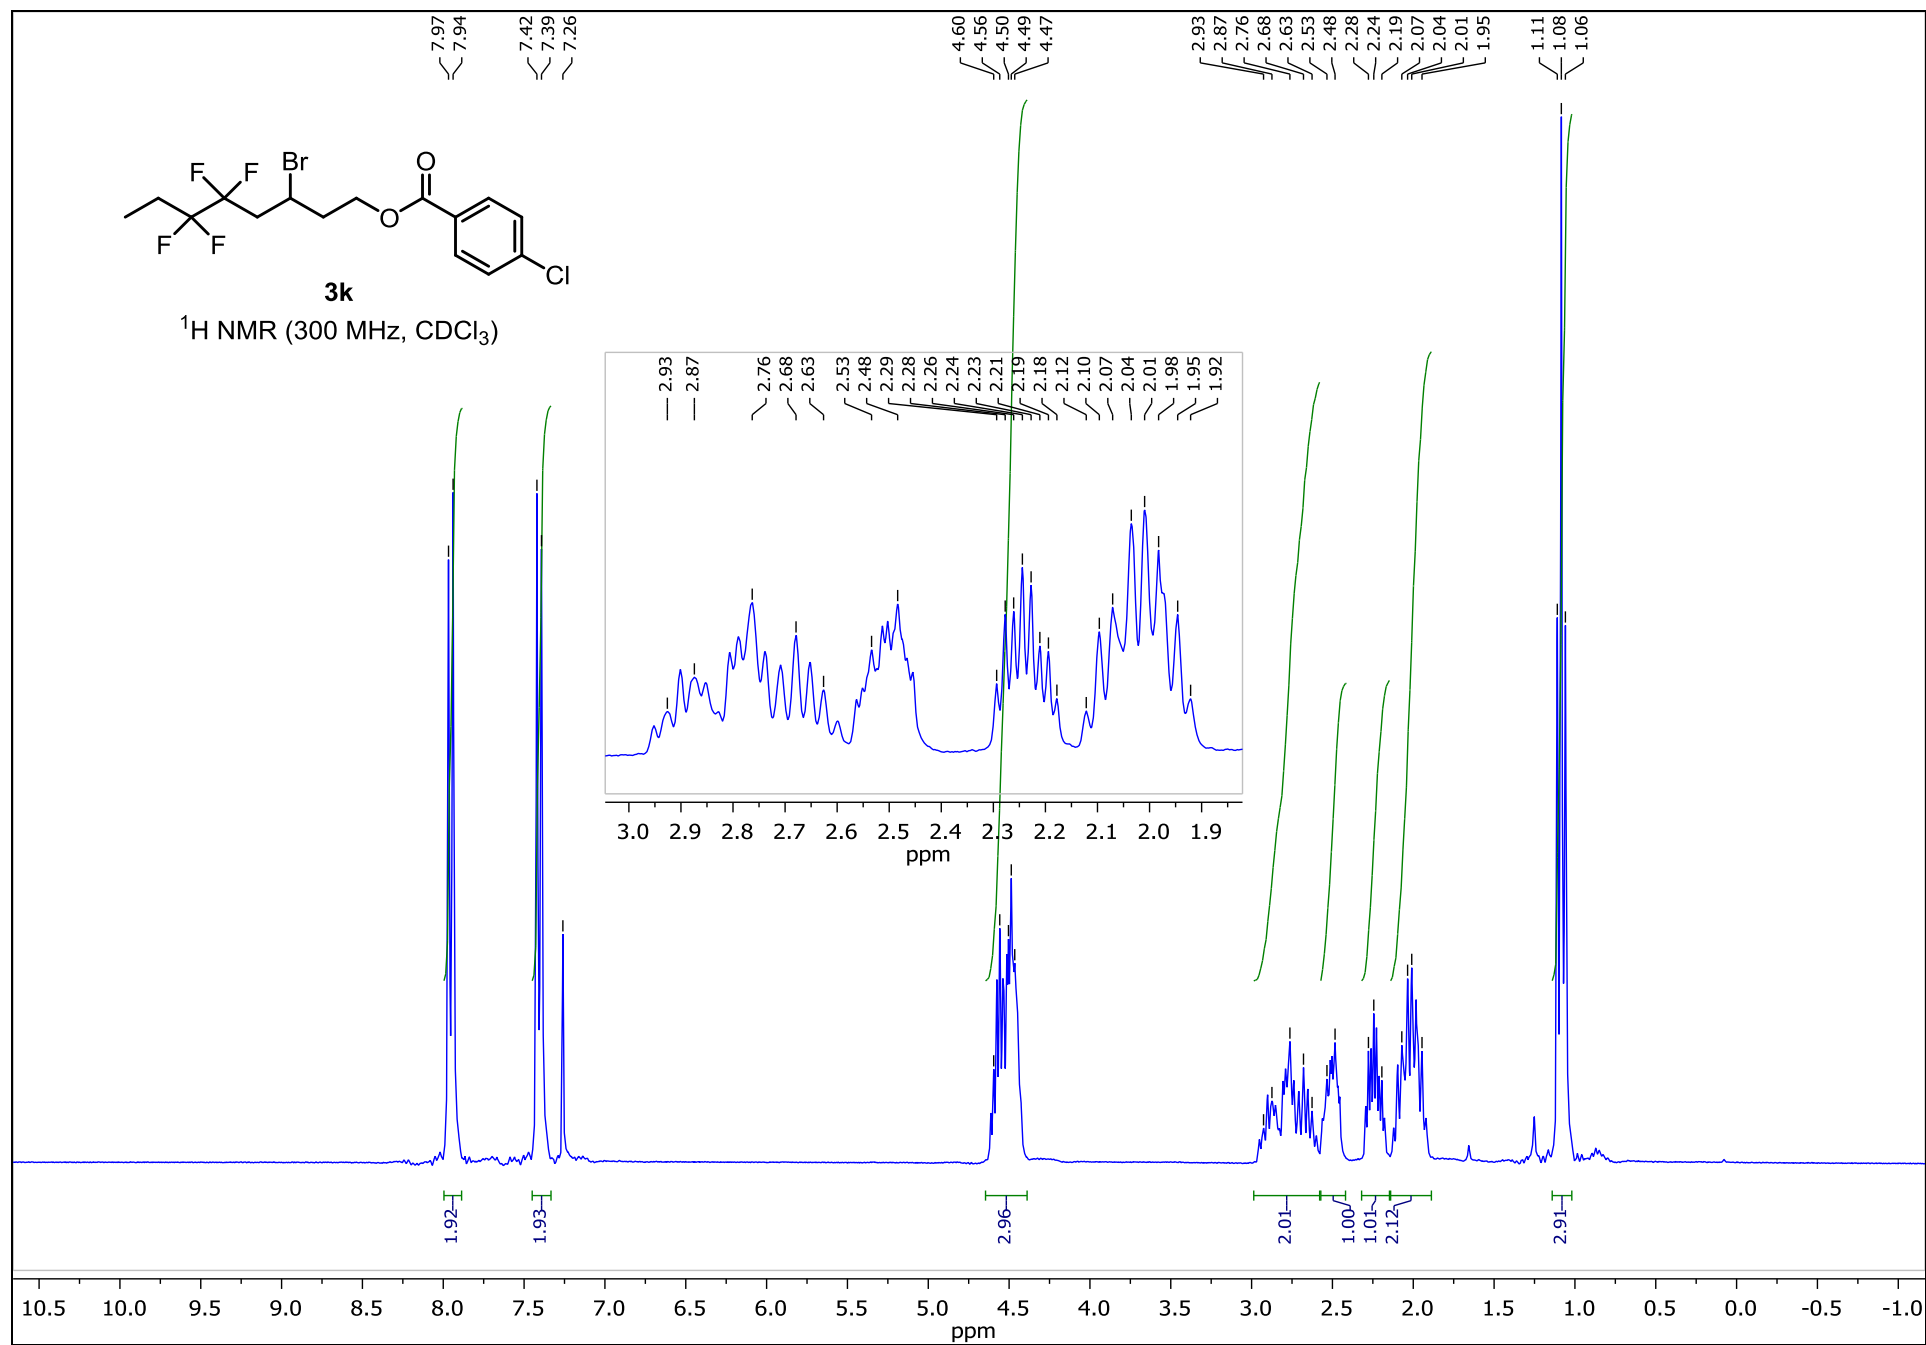

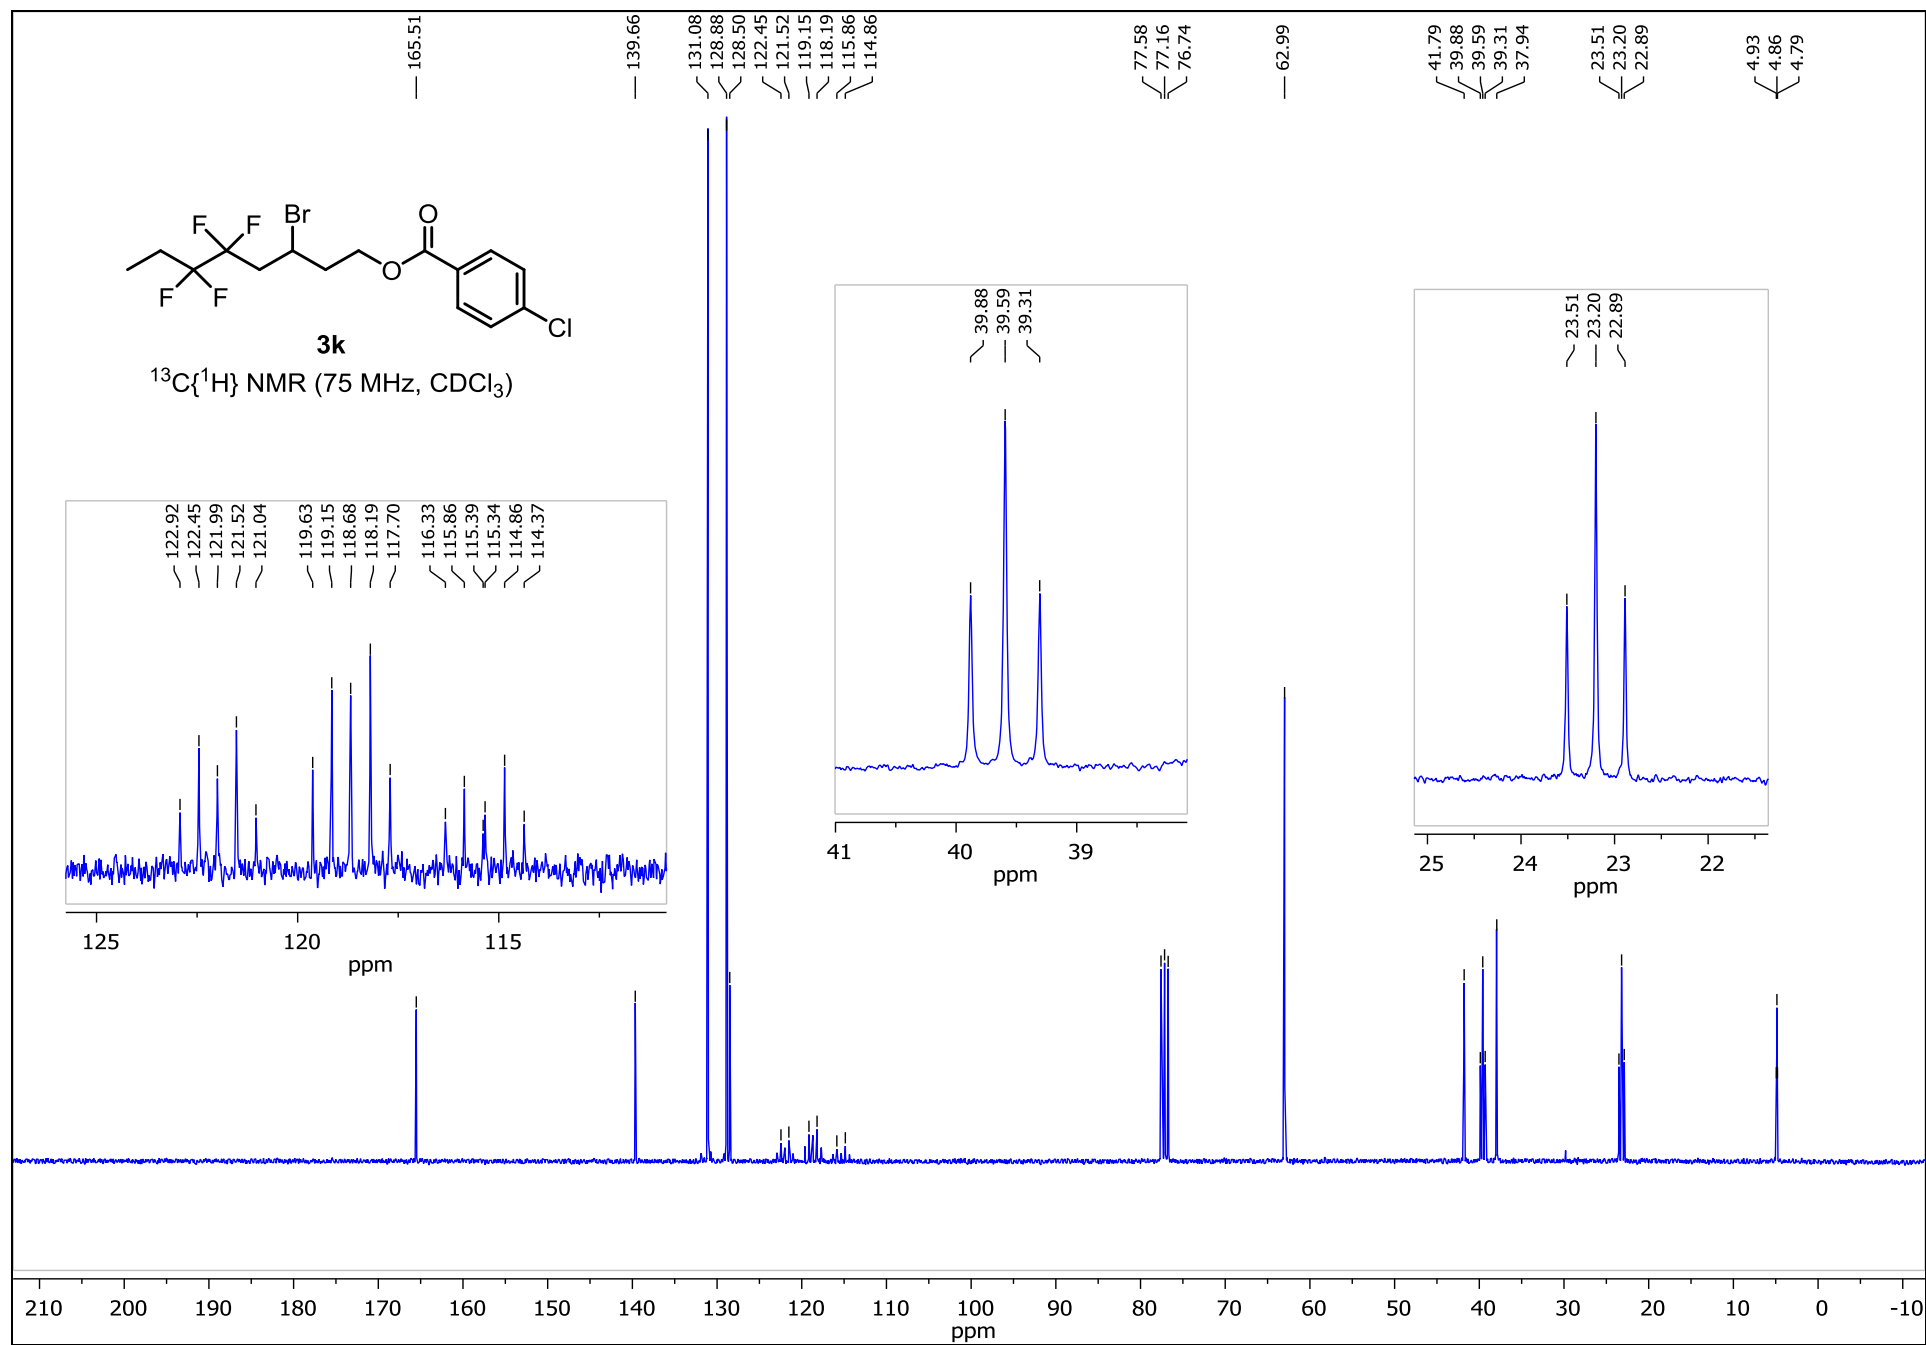



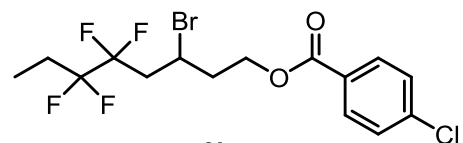

$^{19}\text{F}$  NMR (282 MHz,  $\text{CDCl}_3$ )

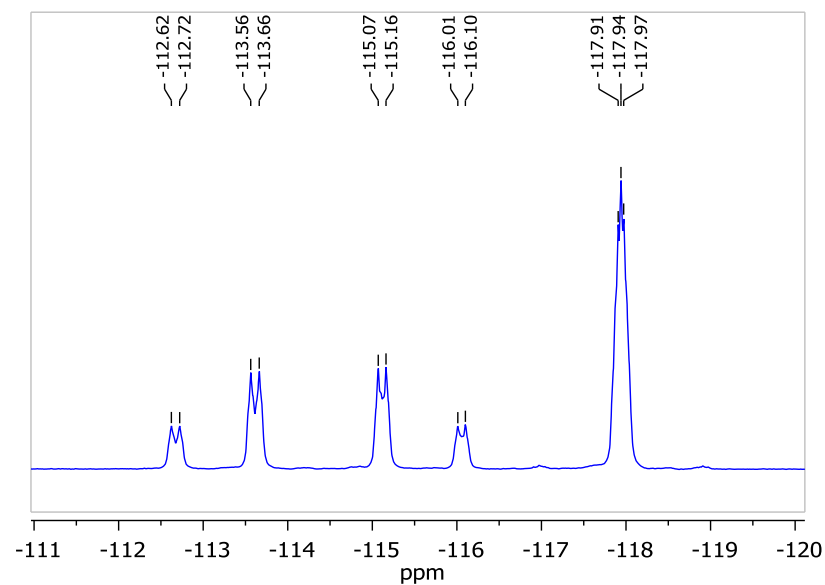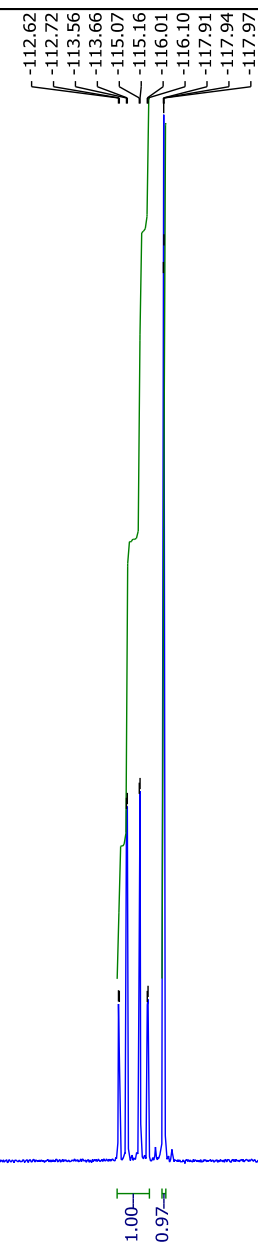

10 0 -10 -20 -30 -40 -50 -60 -70 -80 -90 -100 -110 -120 -130 -140 -150 -160 -170 -180 -190 -200 -210

ppm

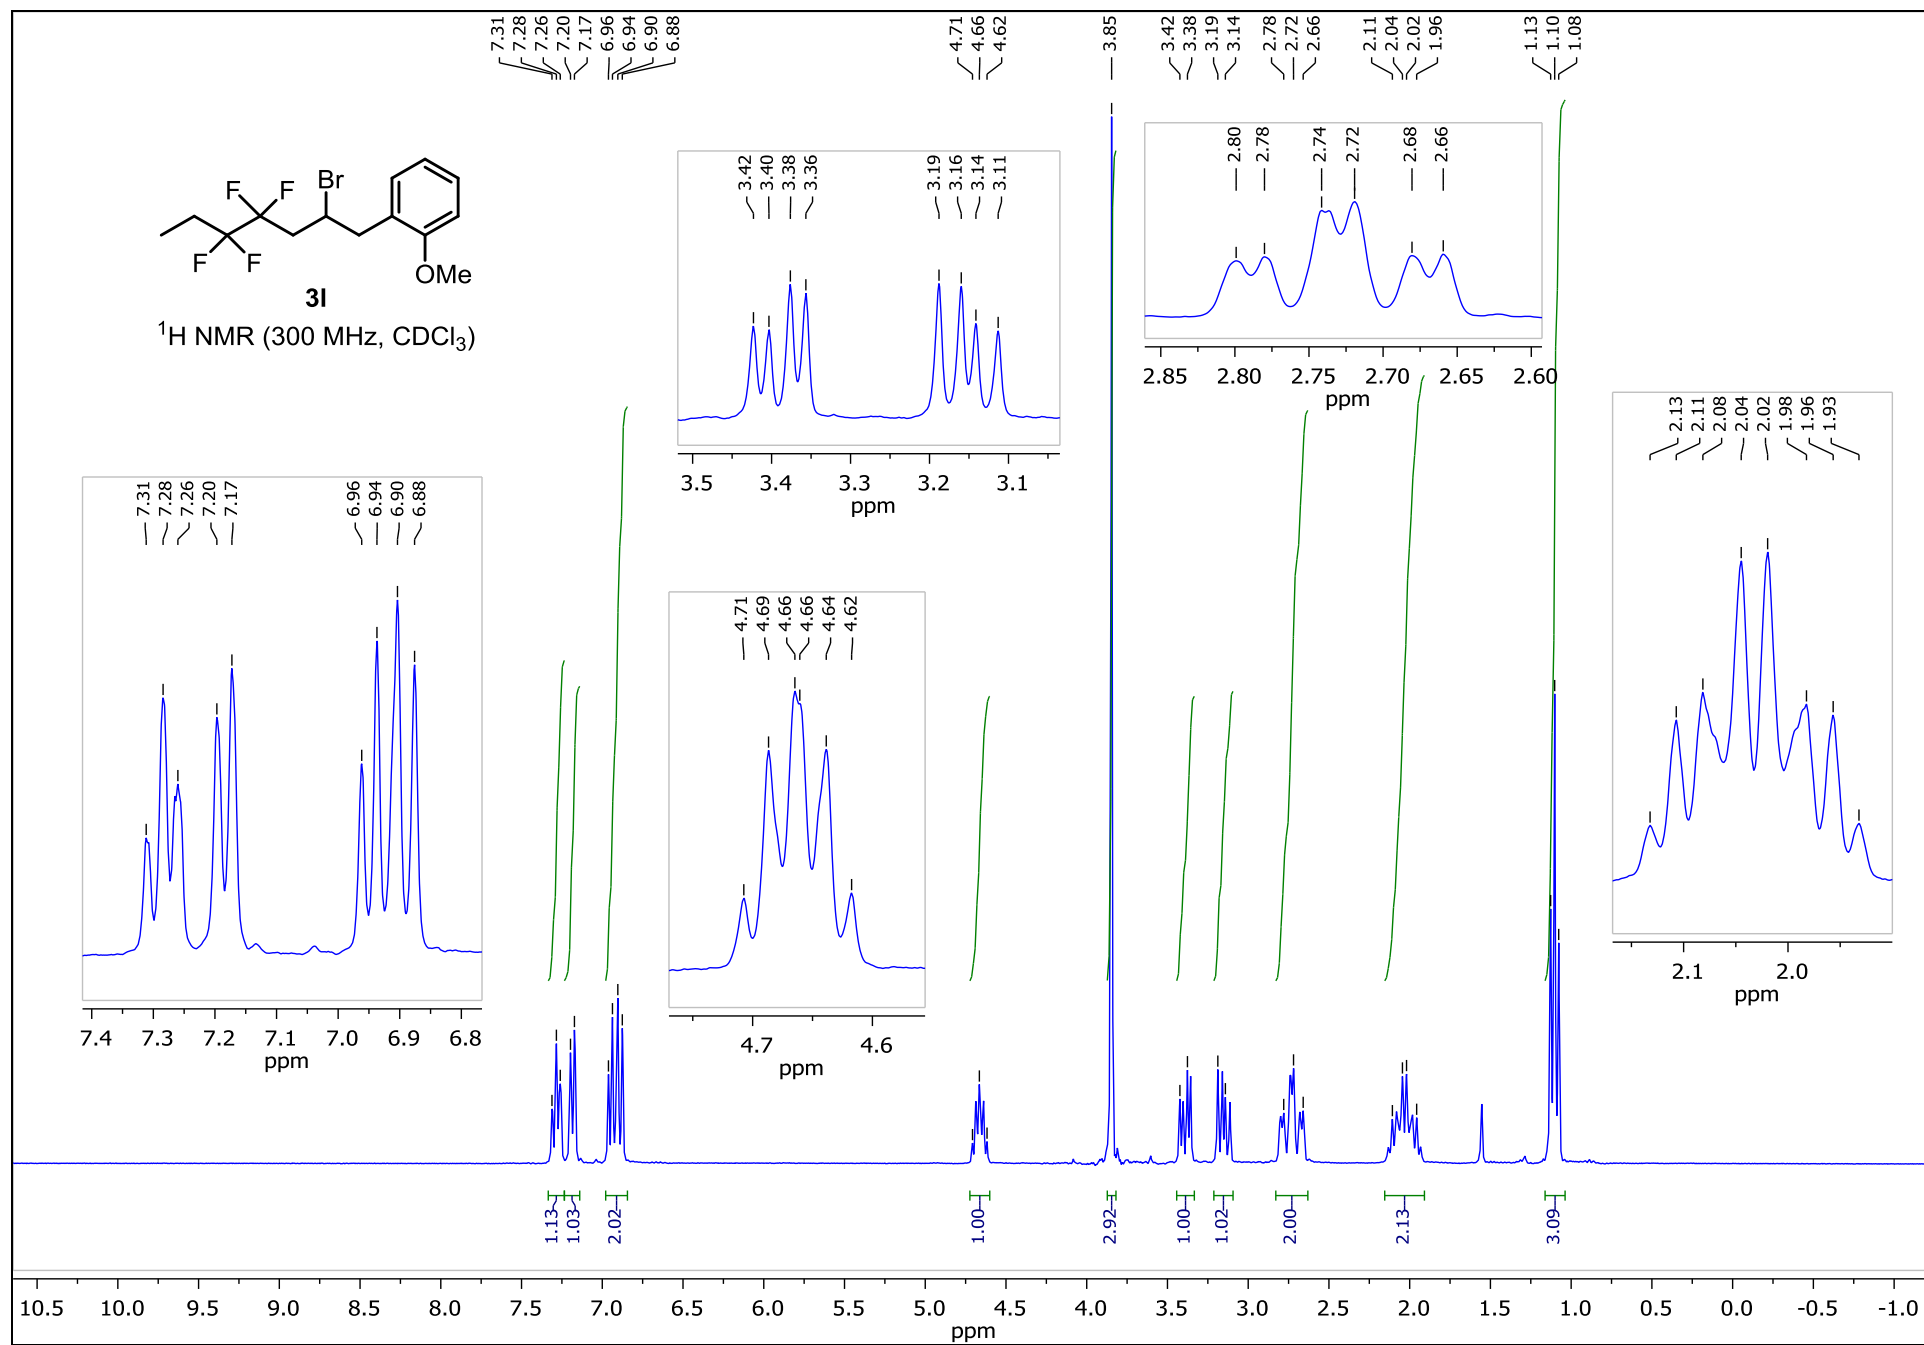

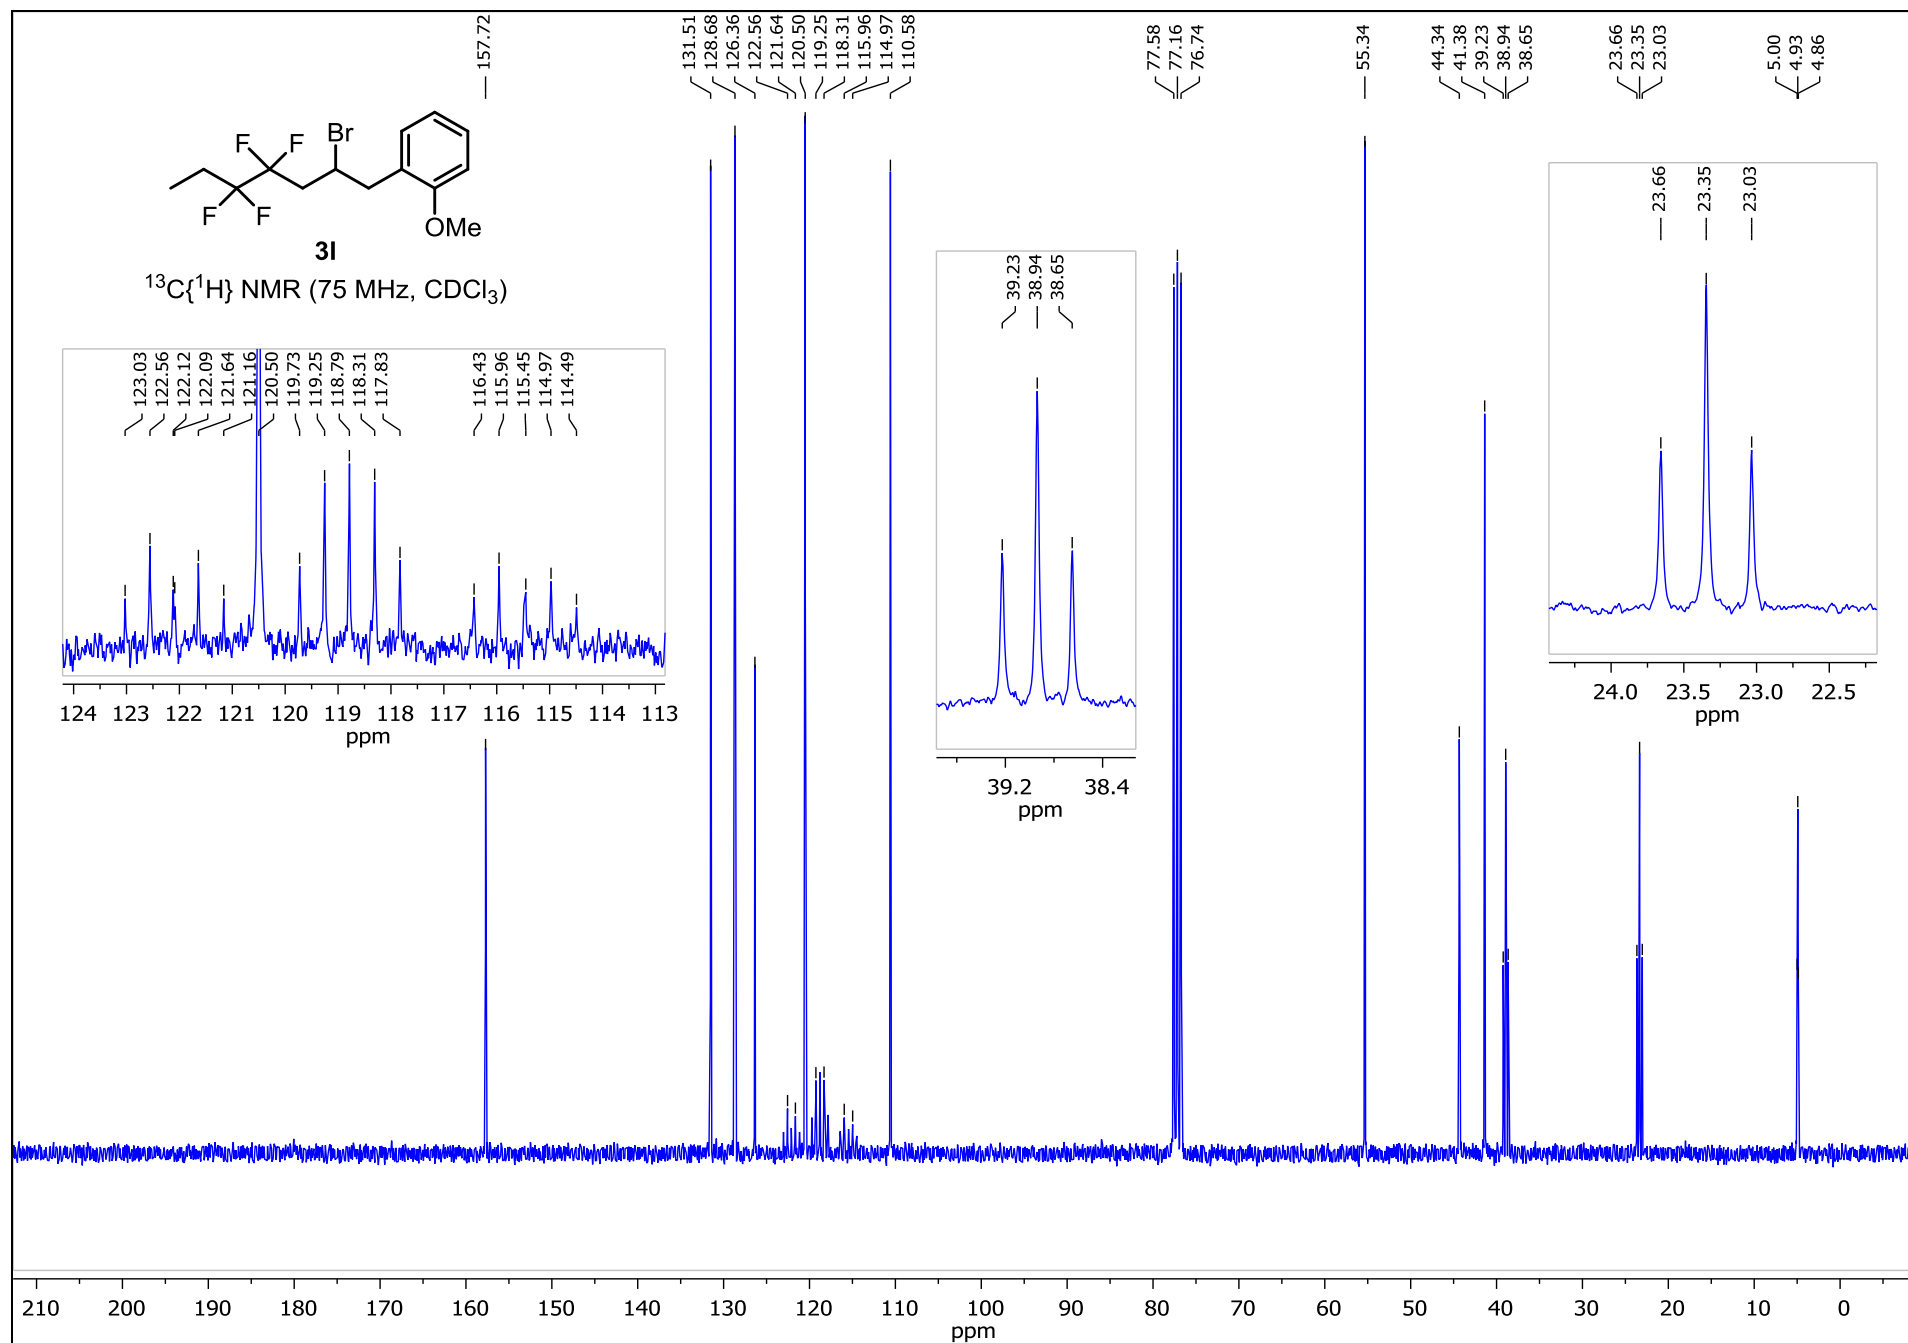

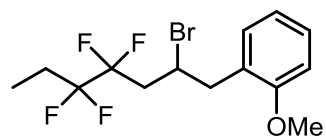**3l**<sup>19</sup>F NMR (282 MHz, CDCl<sub>3</sub>)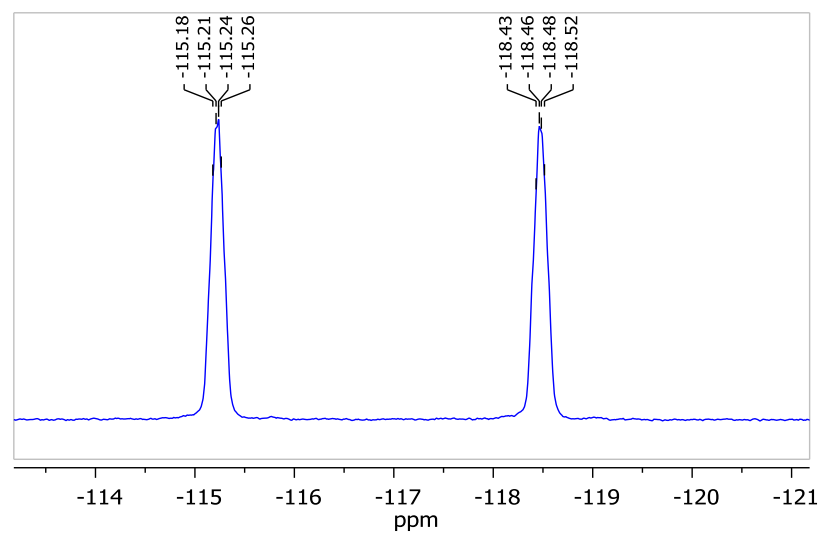

— -115.24  
— -118.46

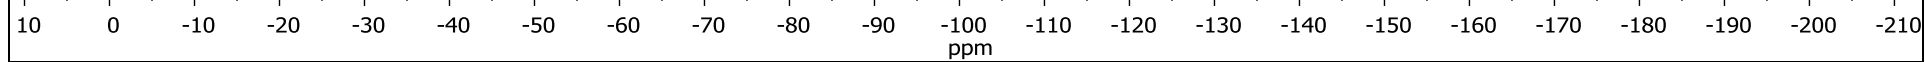

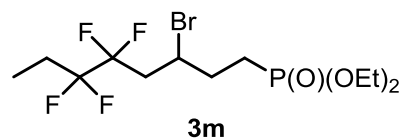

$^1\text{H}$  NMR (300 MHz,  $\text{CDCl}_3$ )

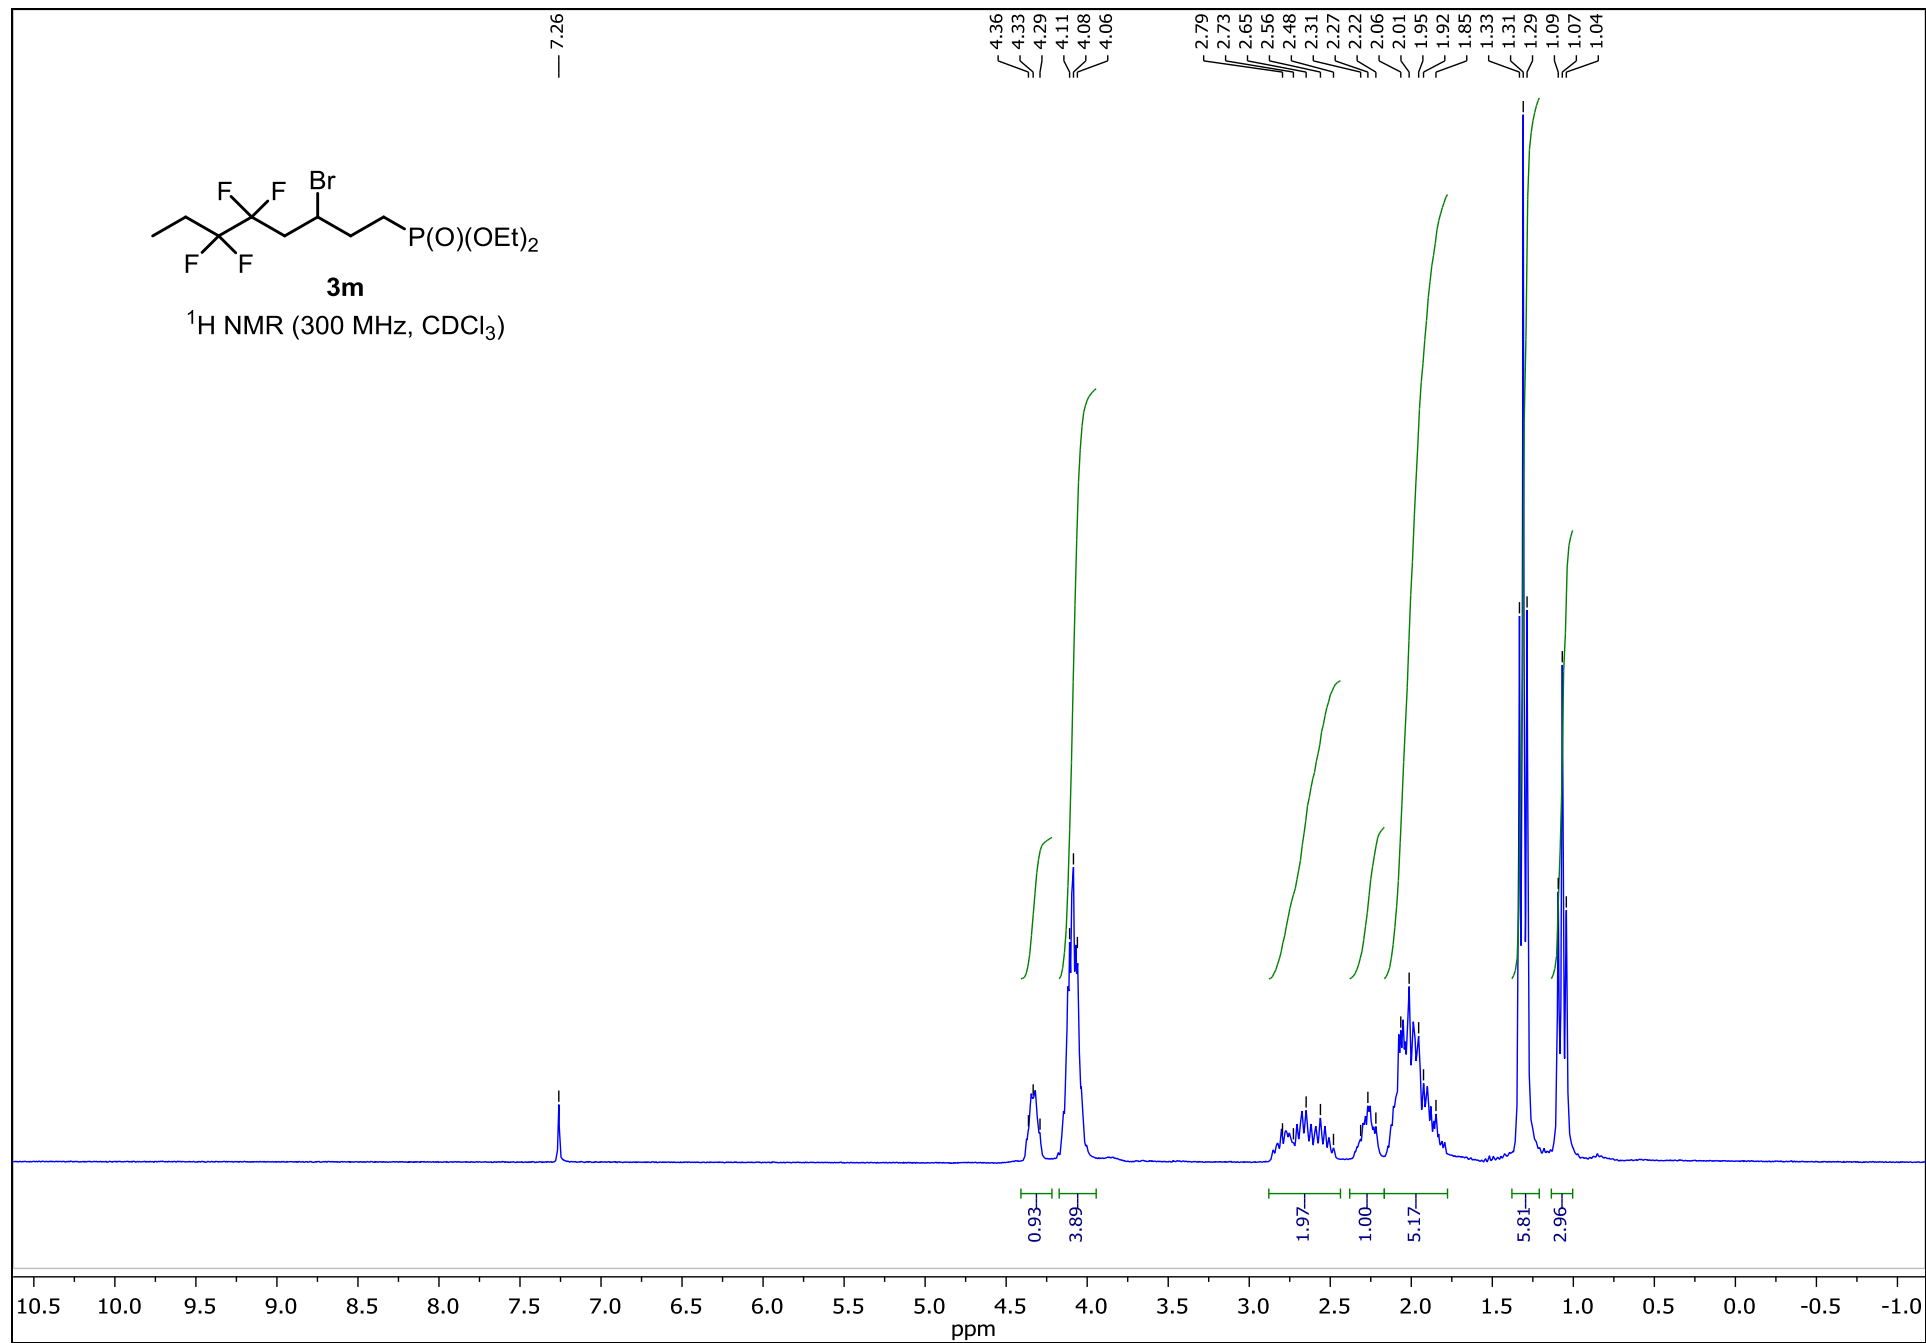

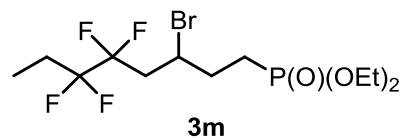

$^{13}\text{C}\{^1\text{H}\}$  NMR (75 MHz,  $\text{CDCl}_3$ )

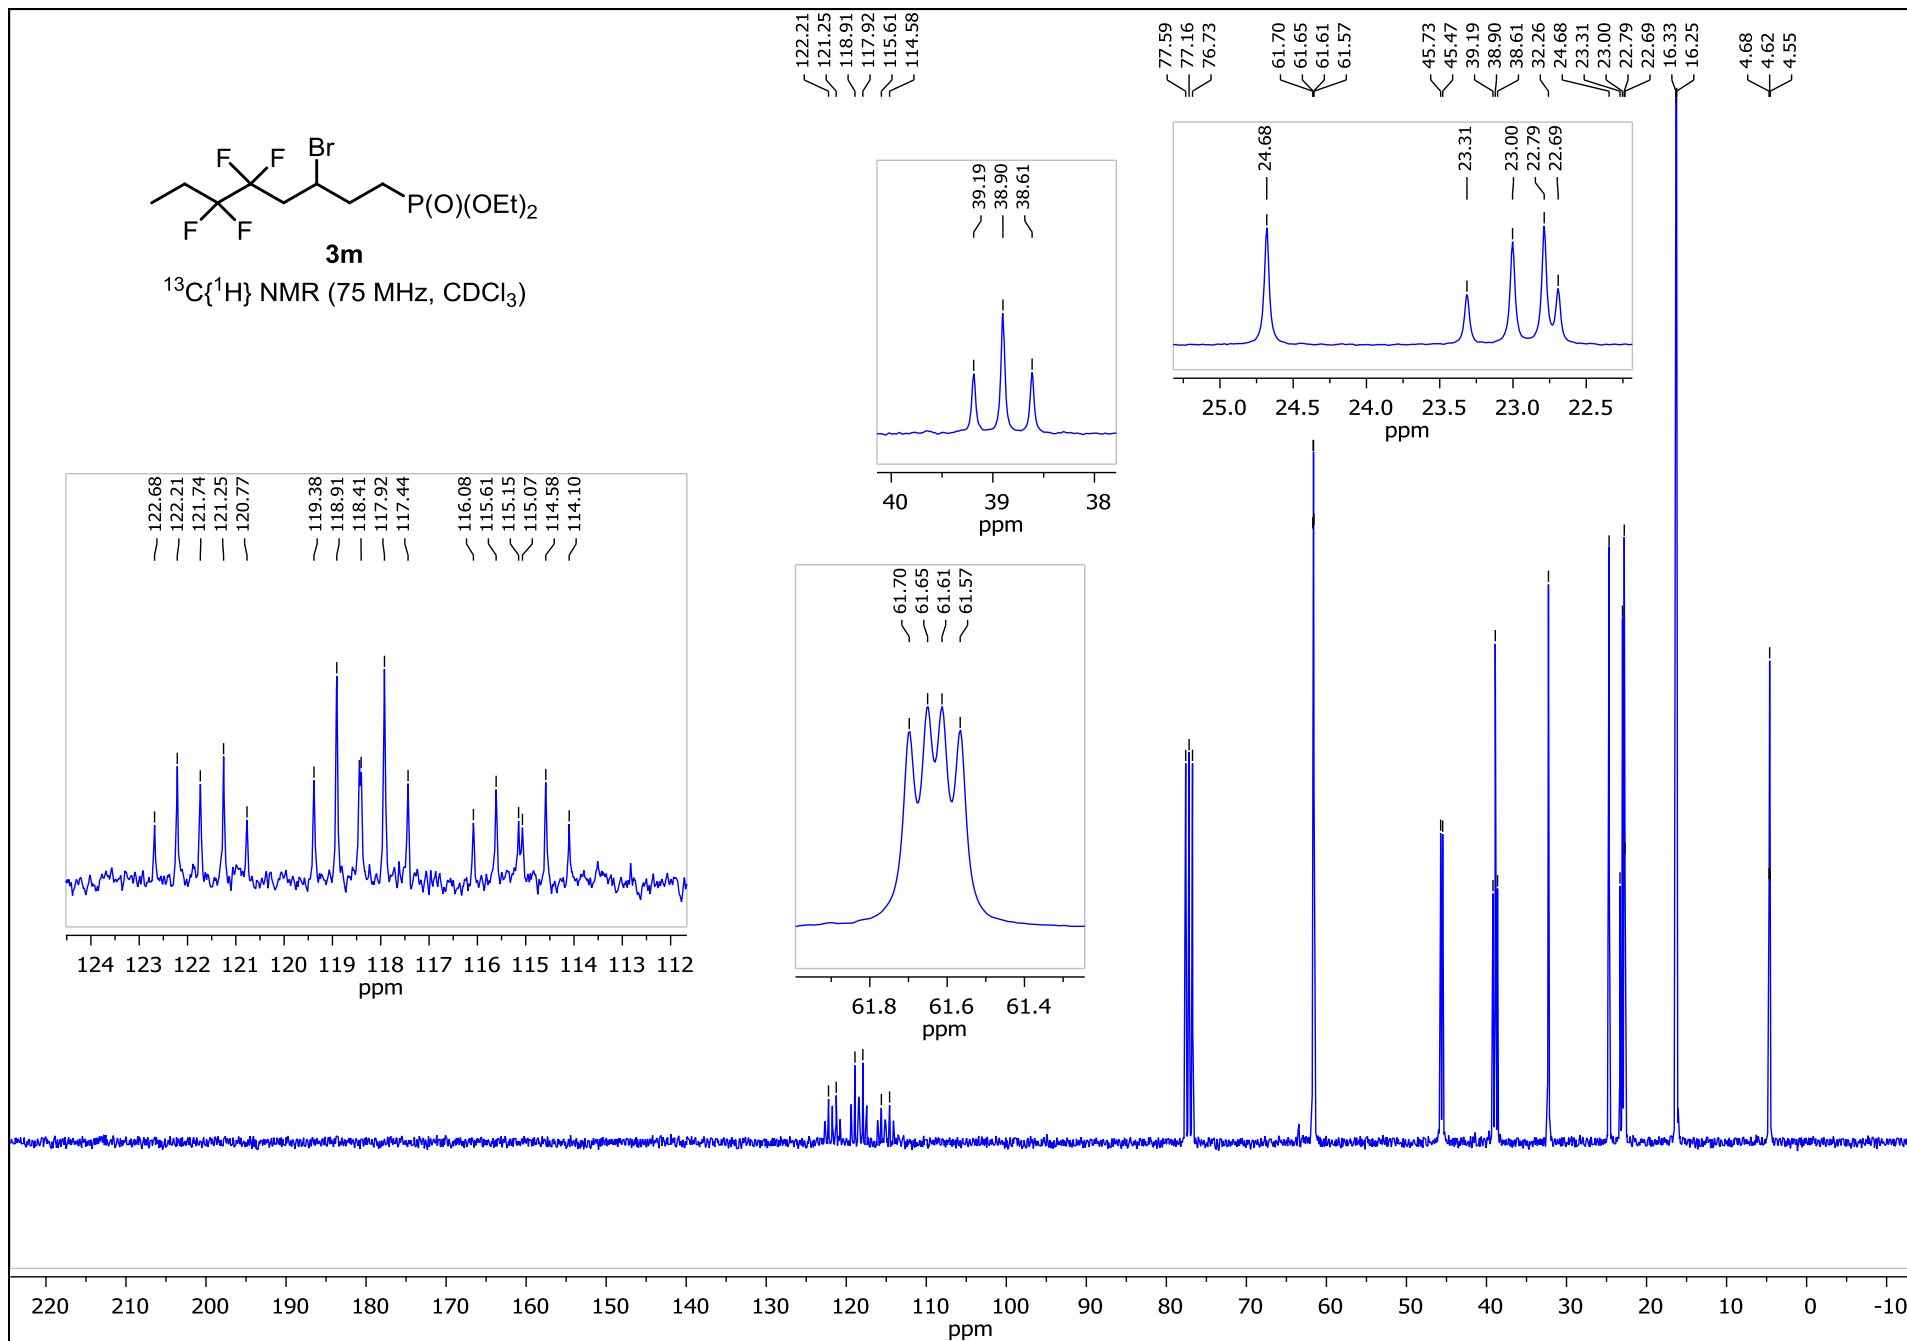

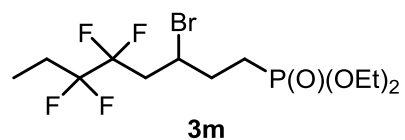

$^{19}\text{F}$  NMR (282 MHz,  $\text{CDCl}_3$ )

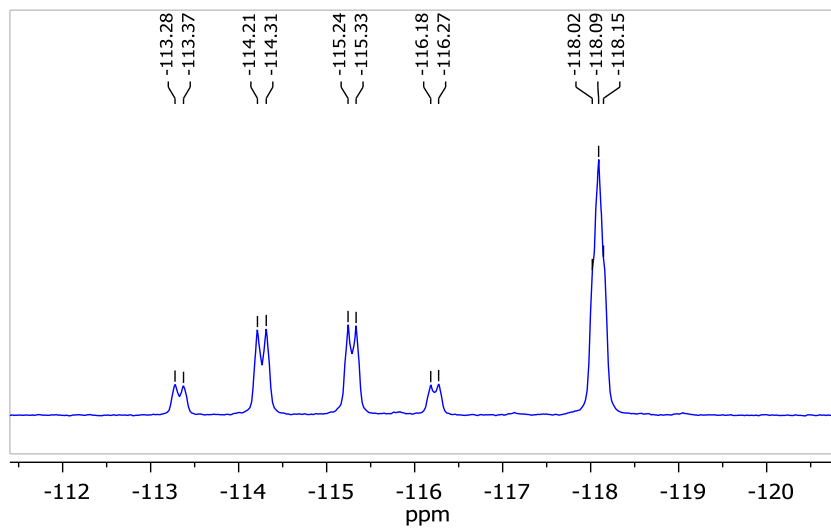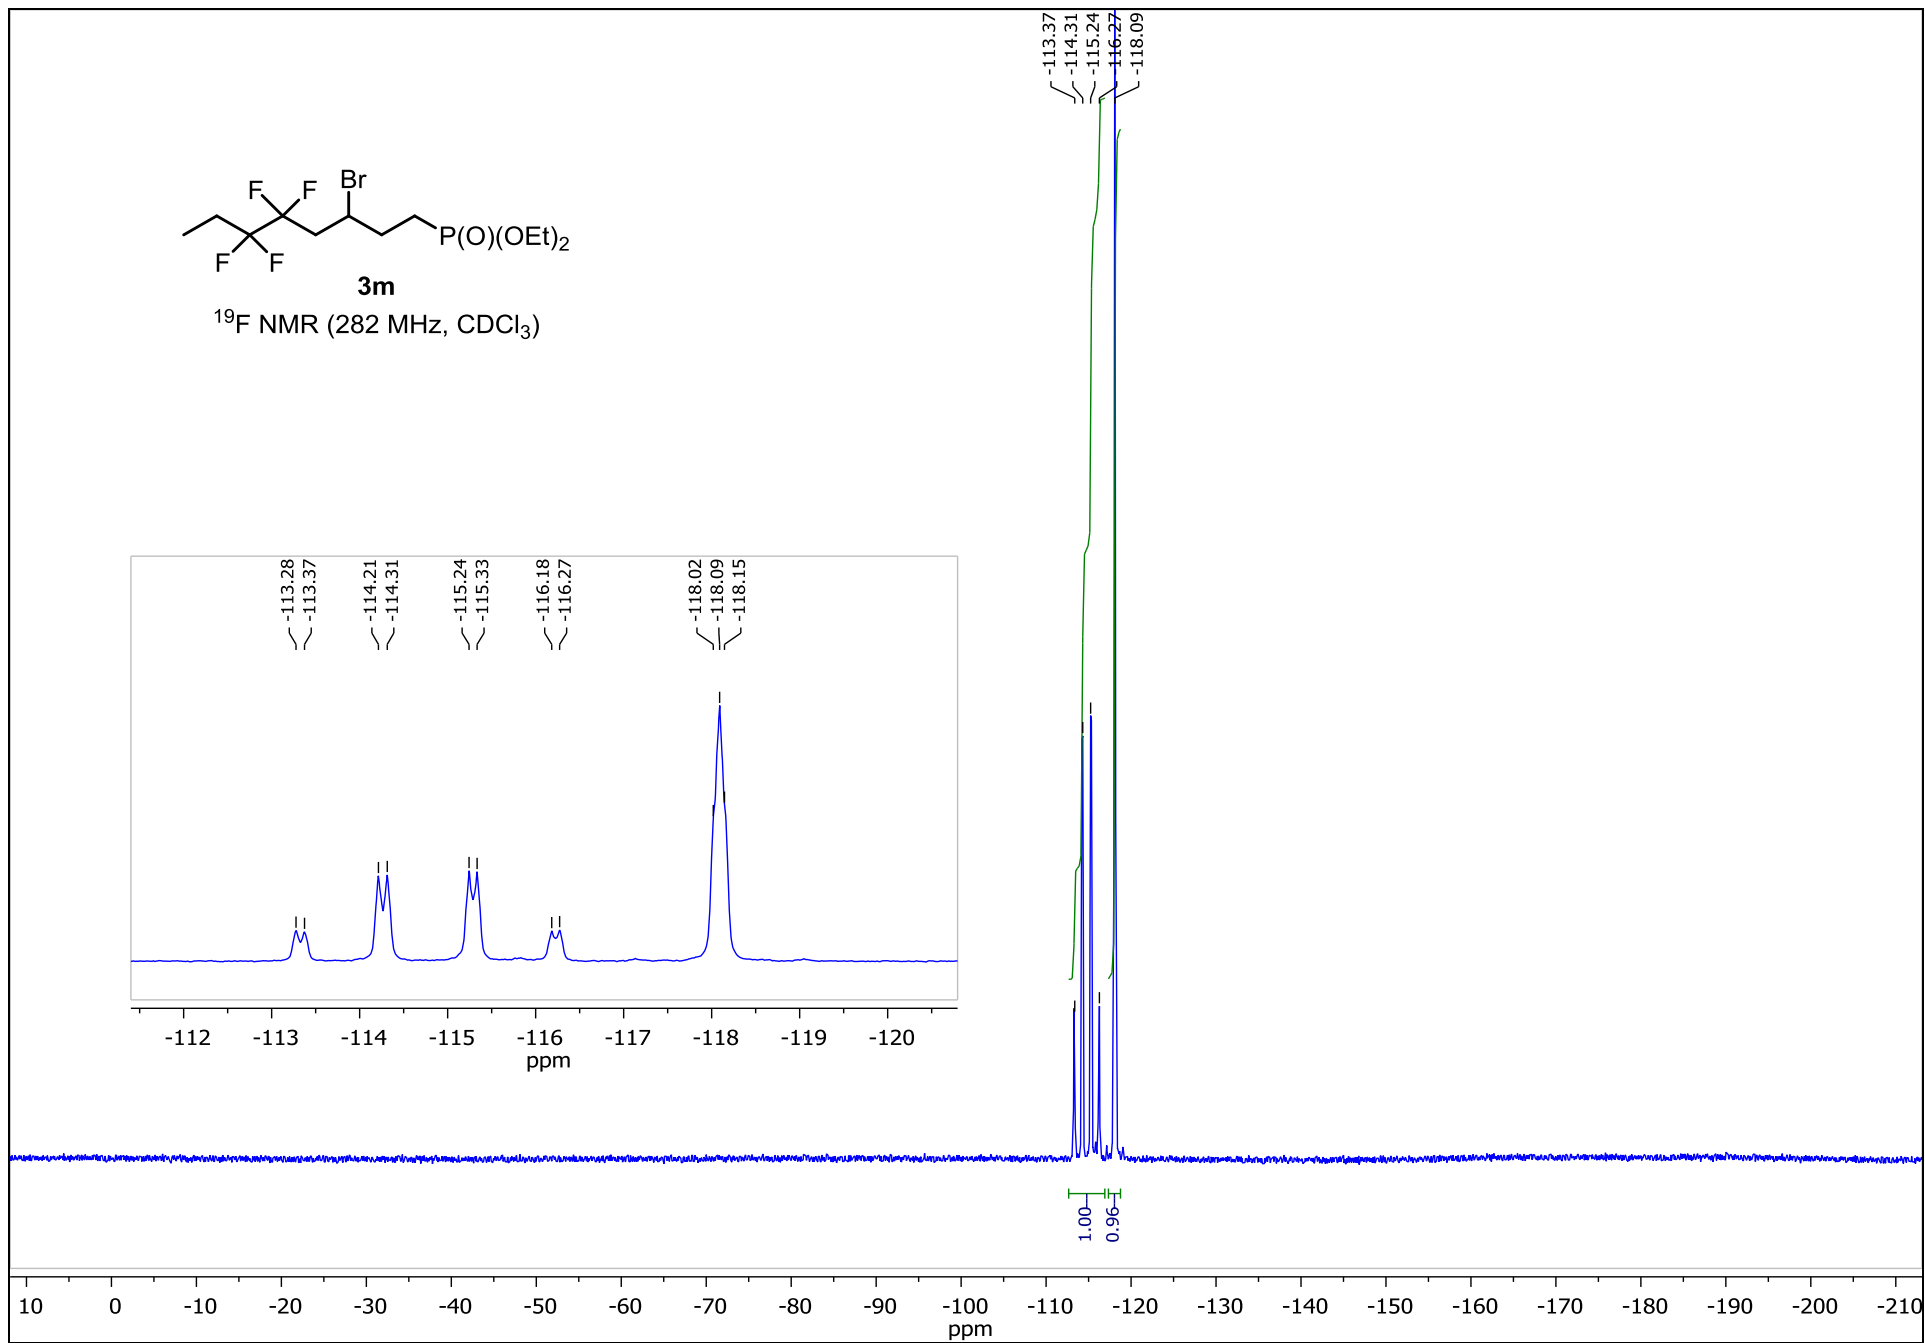

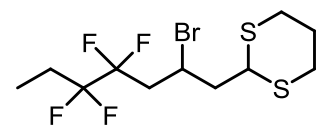**3n** $^1\text{H}$  NMR (300 MHz,  $\text{CDCl}_3$ )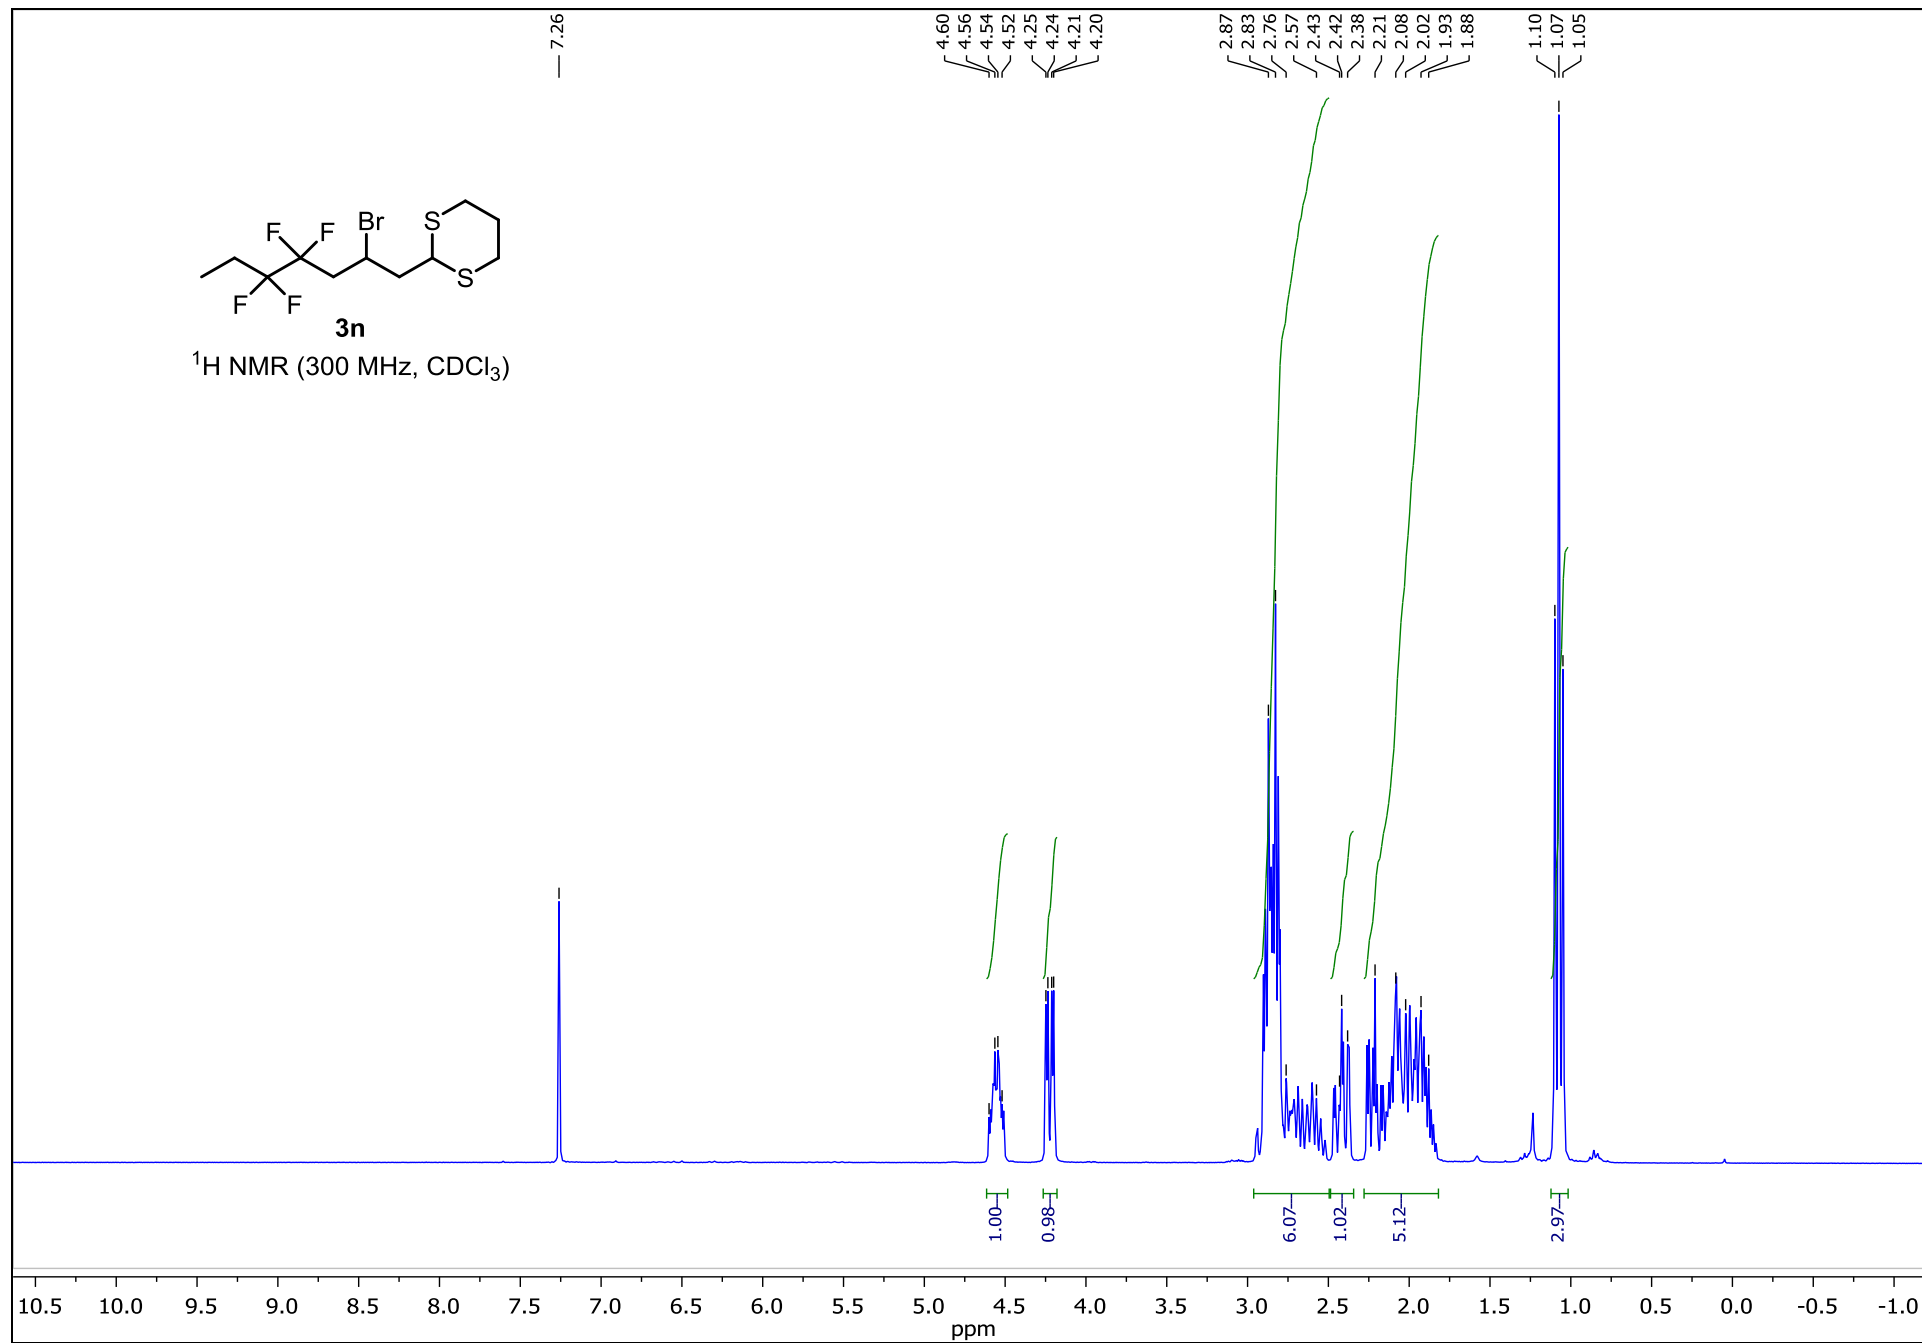



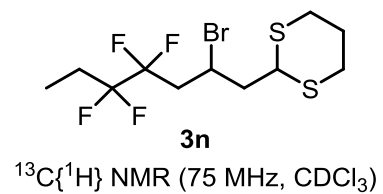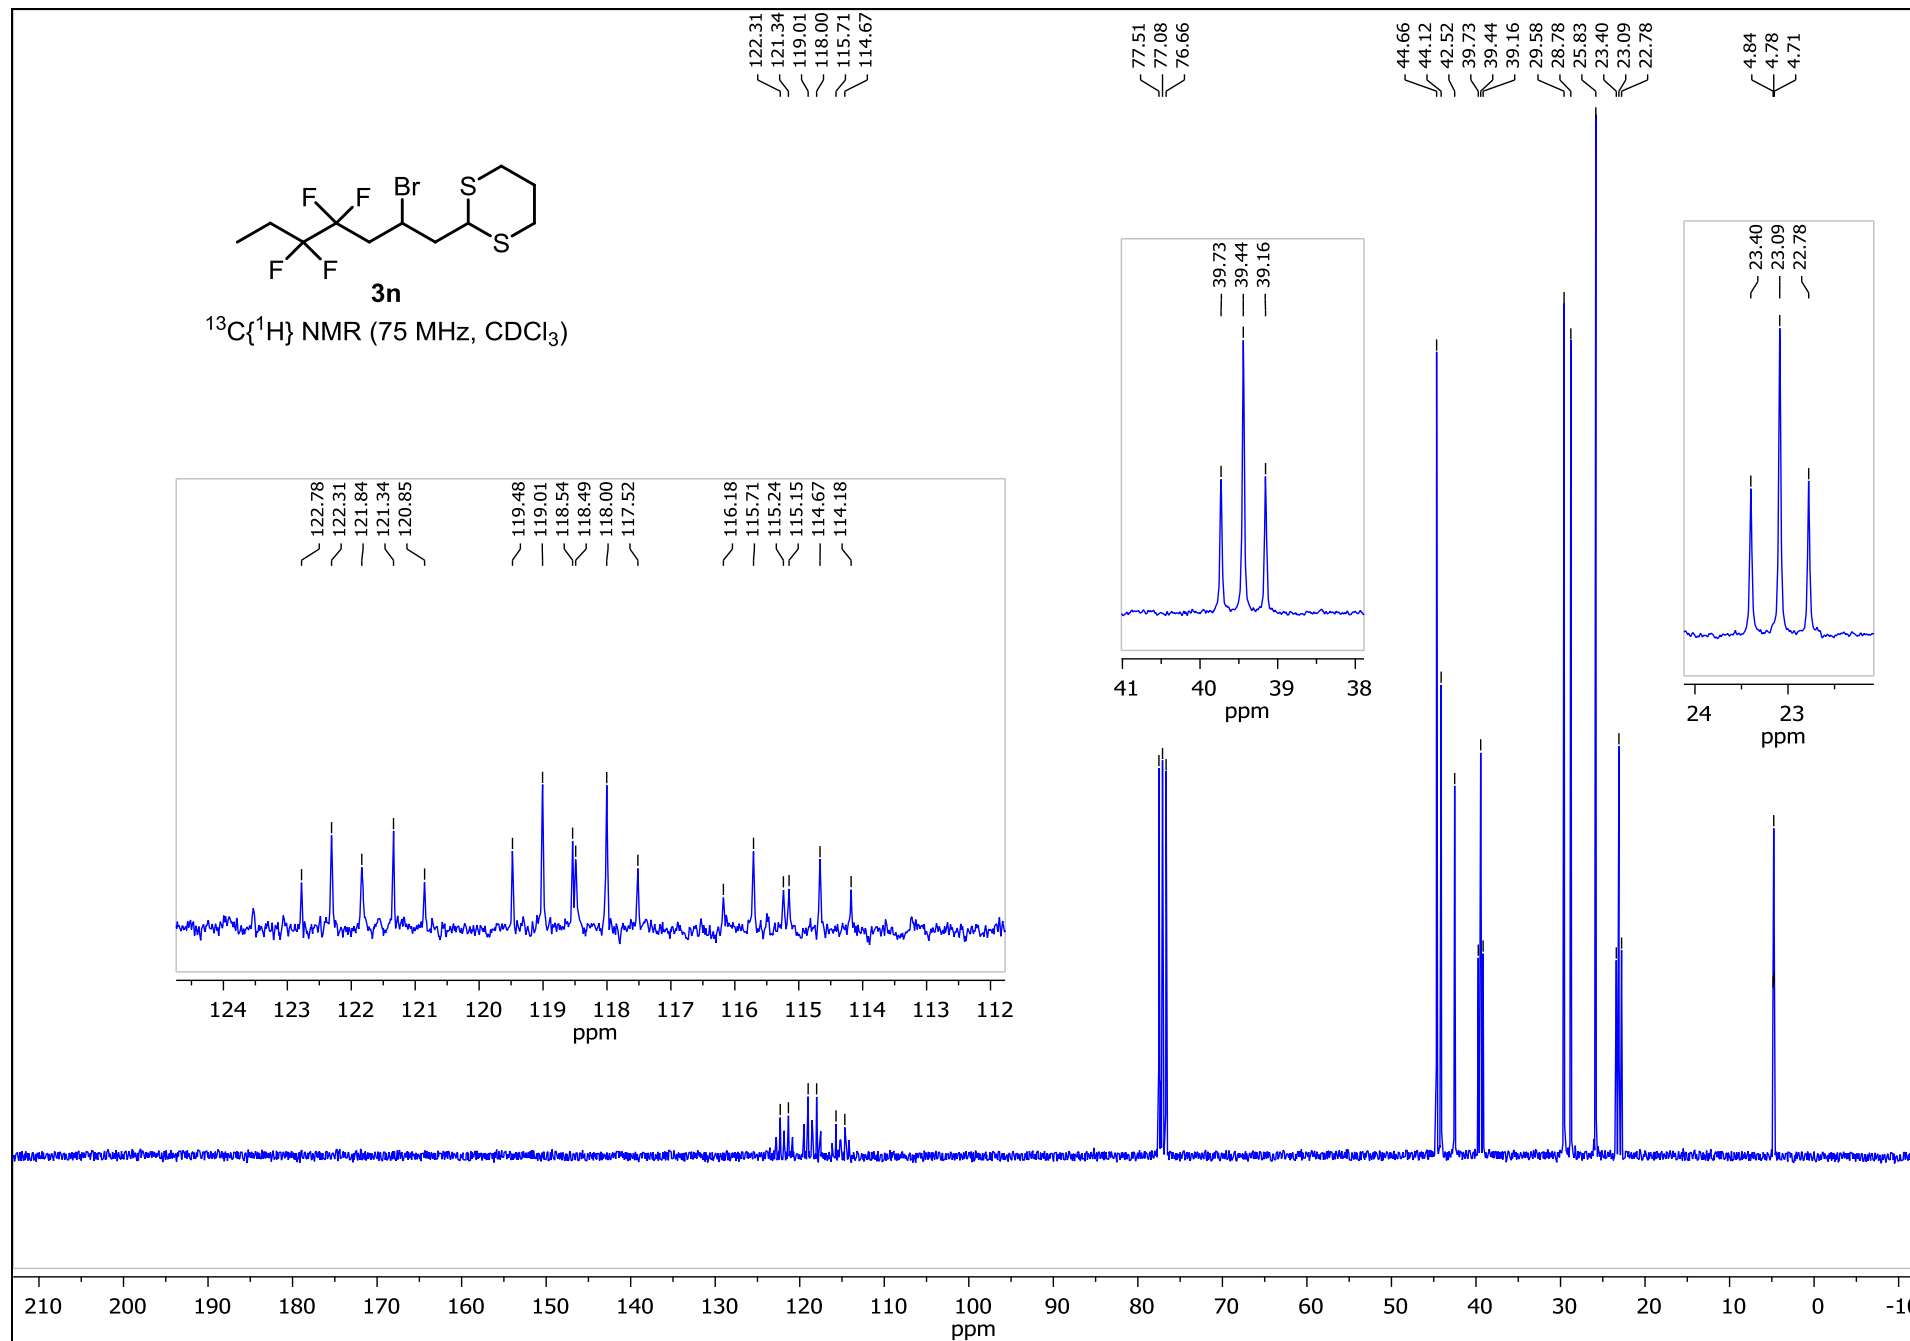

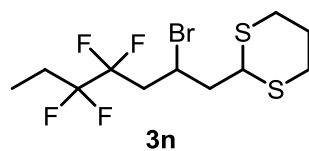

$^{19}\text{F}$  NMR (282 MHz,  $\text{CDCl}_3$ )

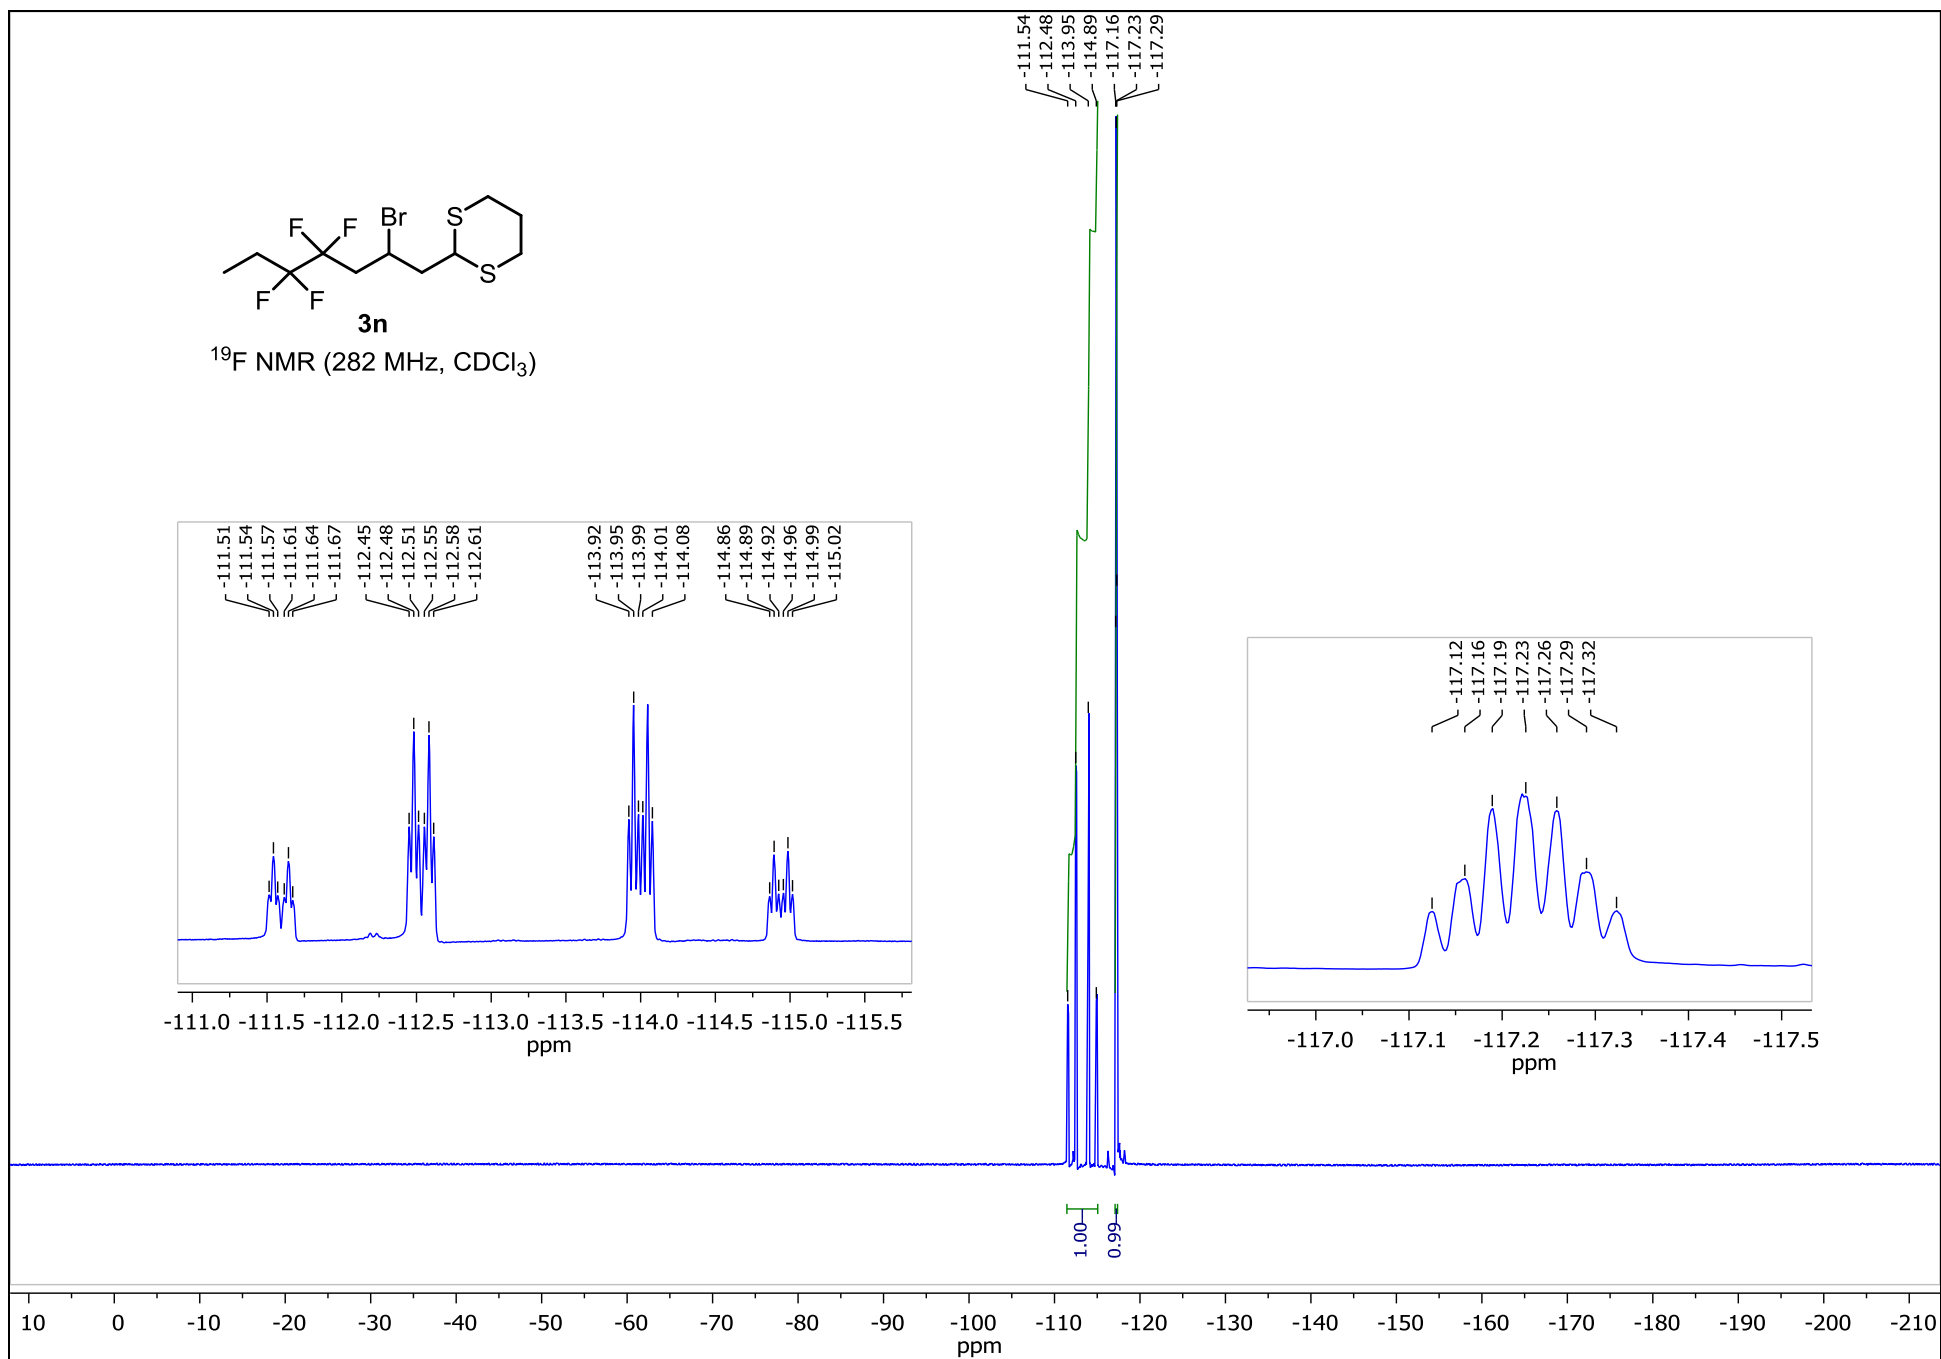

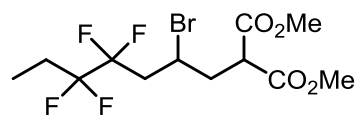

$^1\text{H}$  NMR (300 MHz,  $\text{CDCl}_3$ )

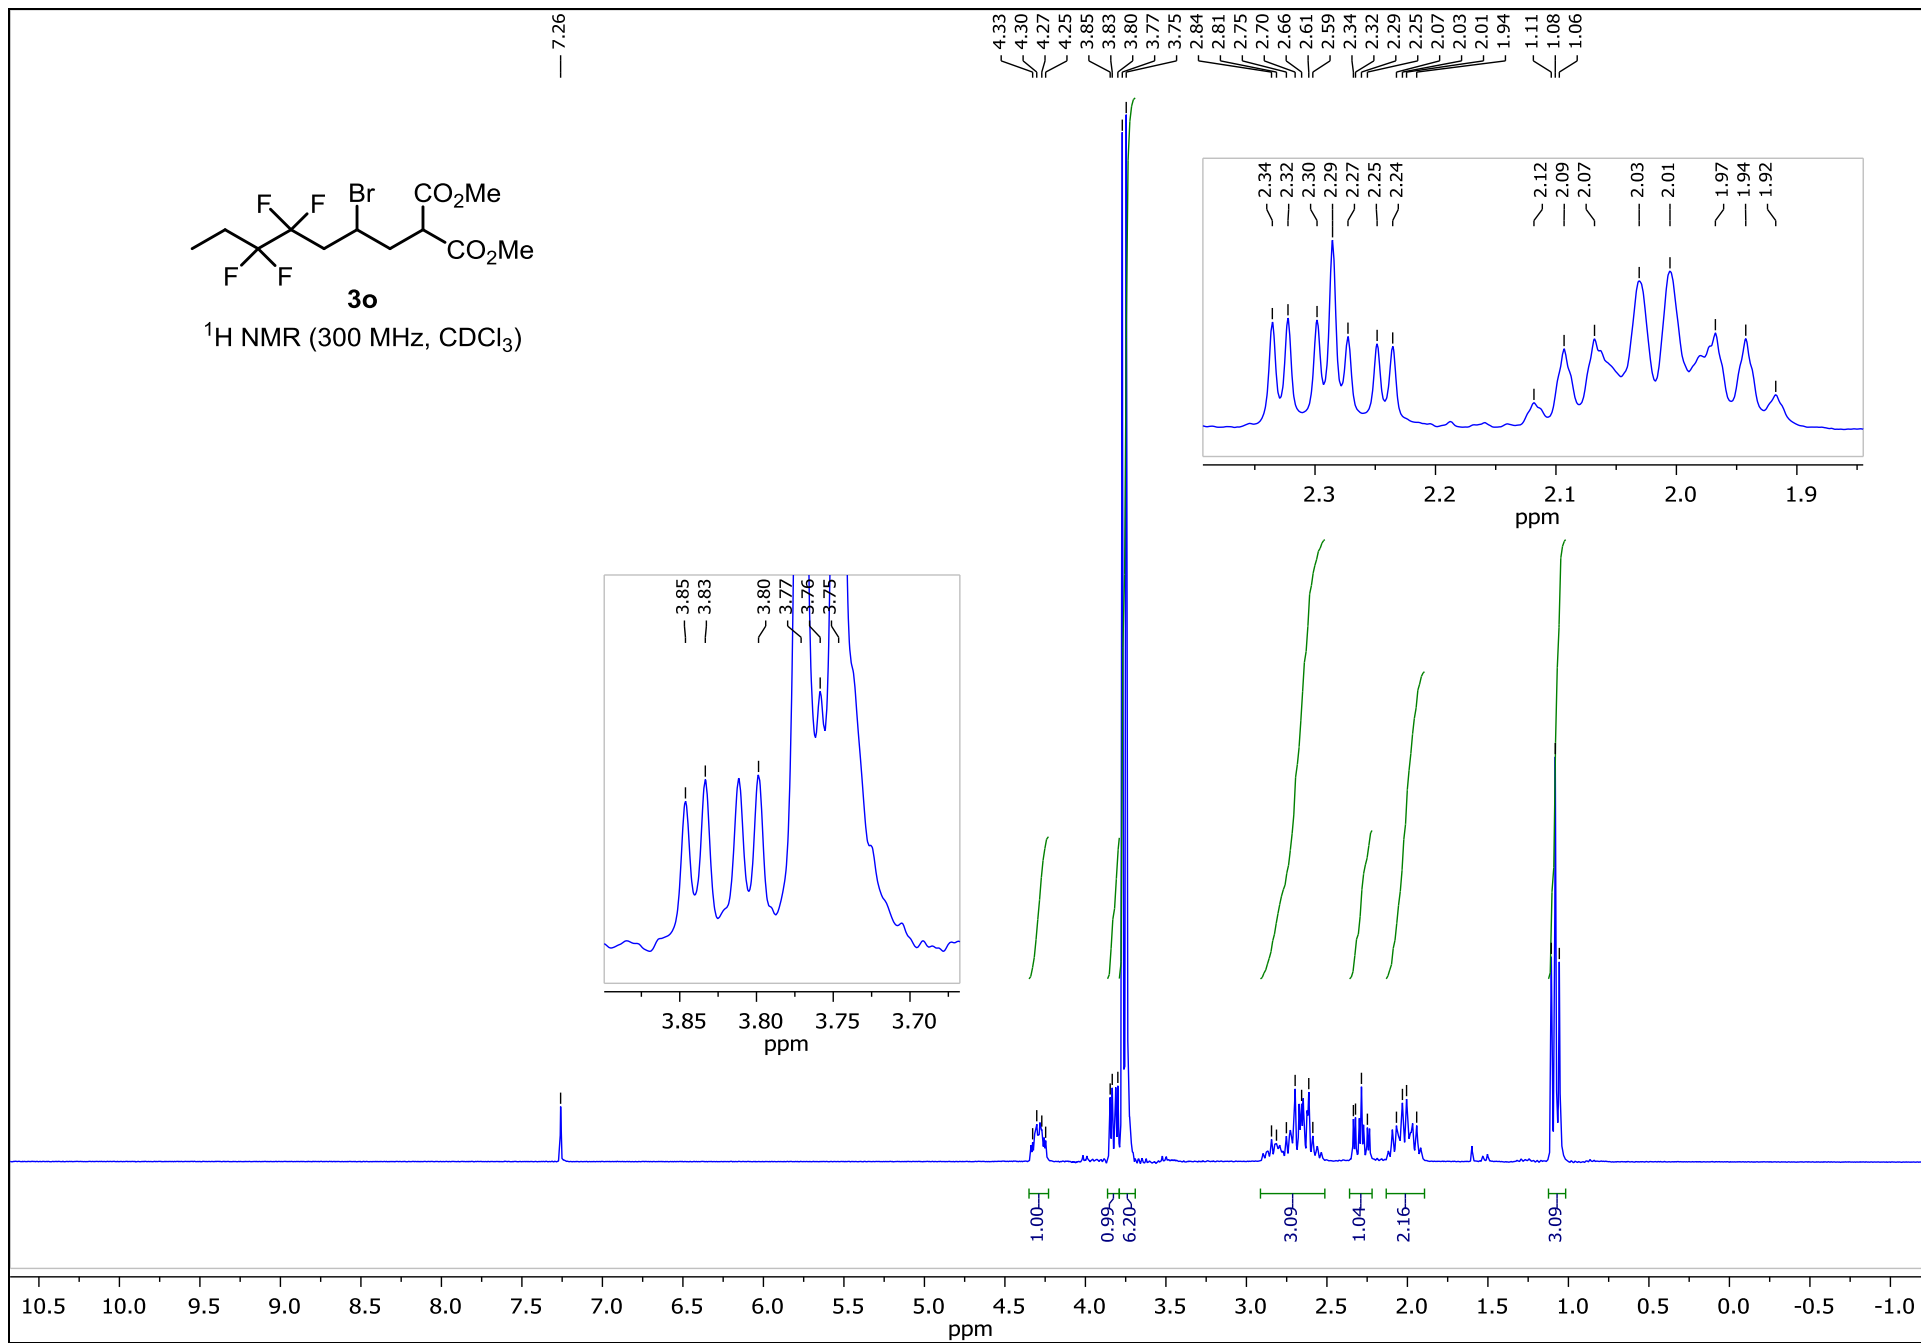

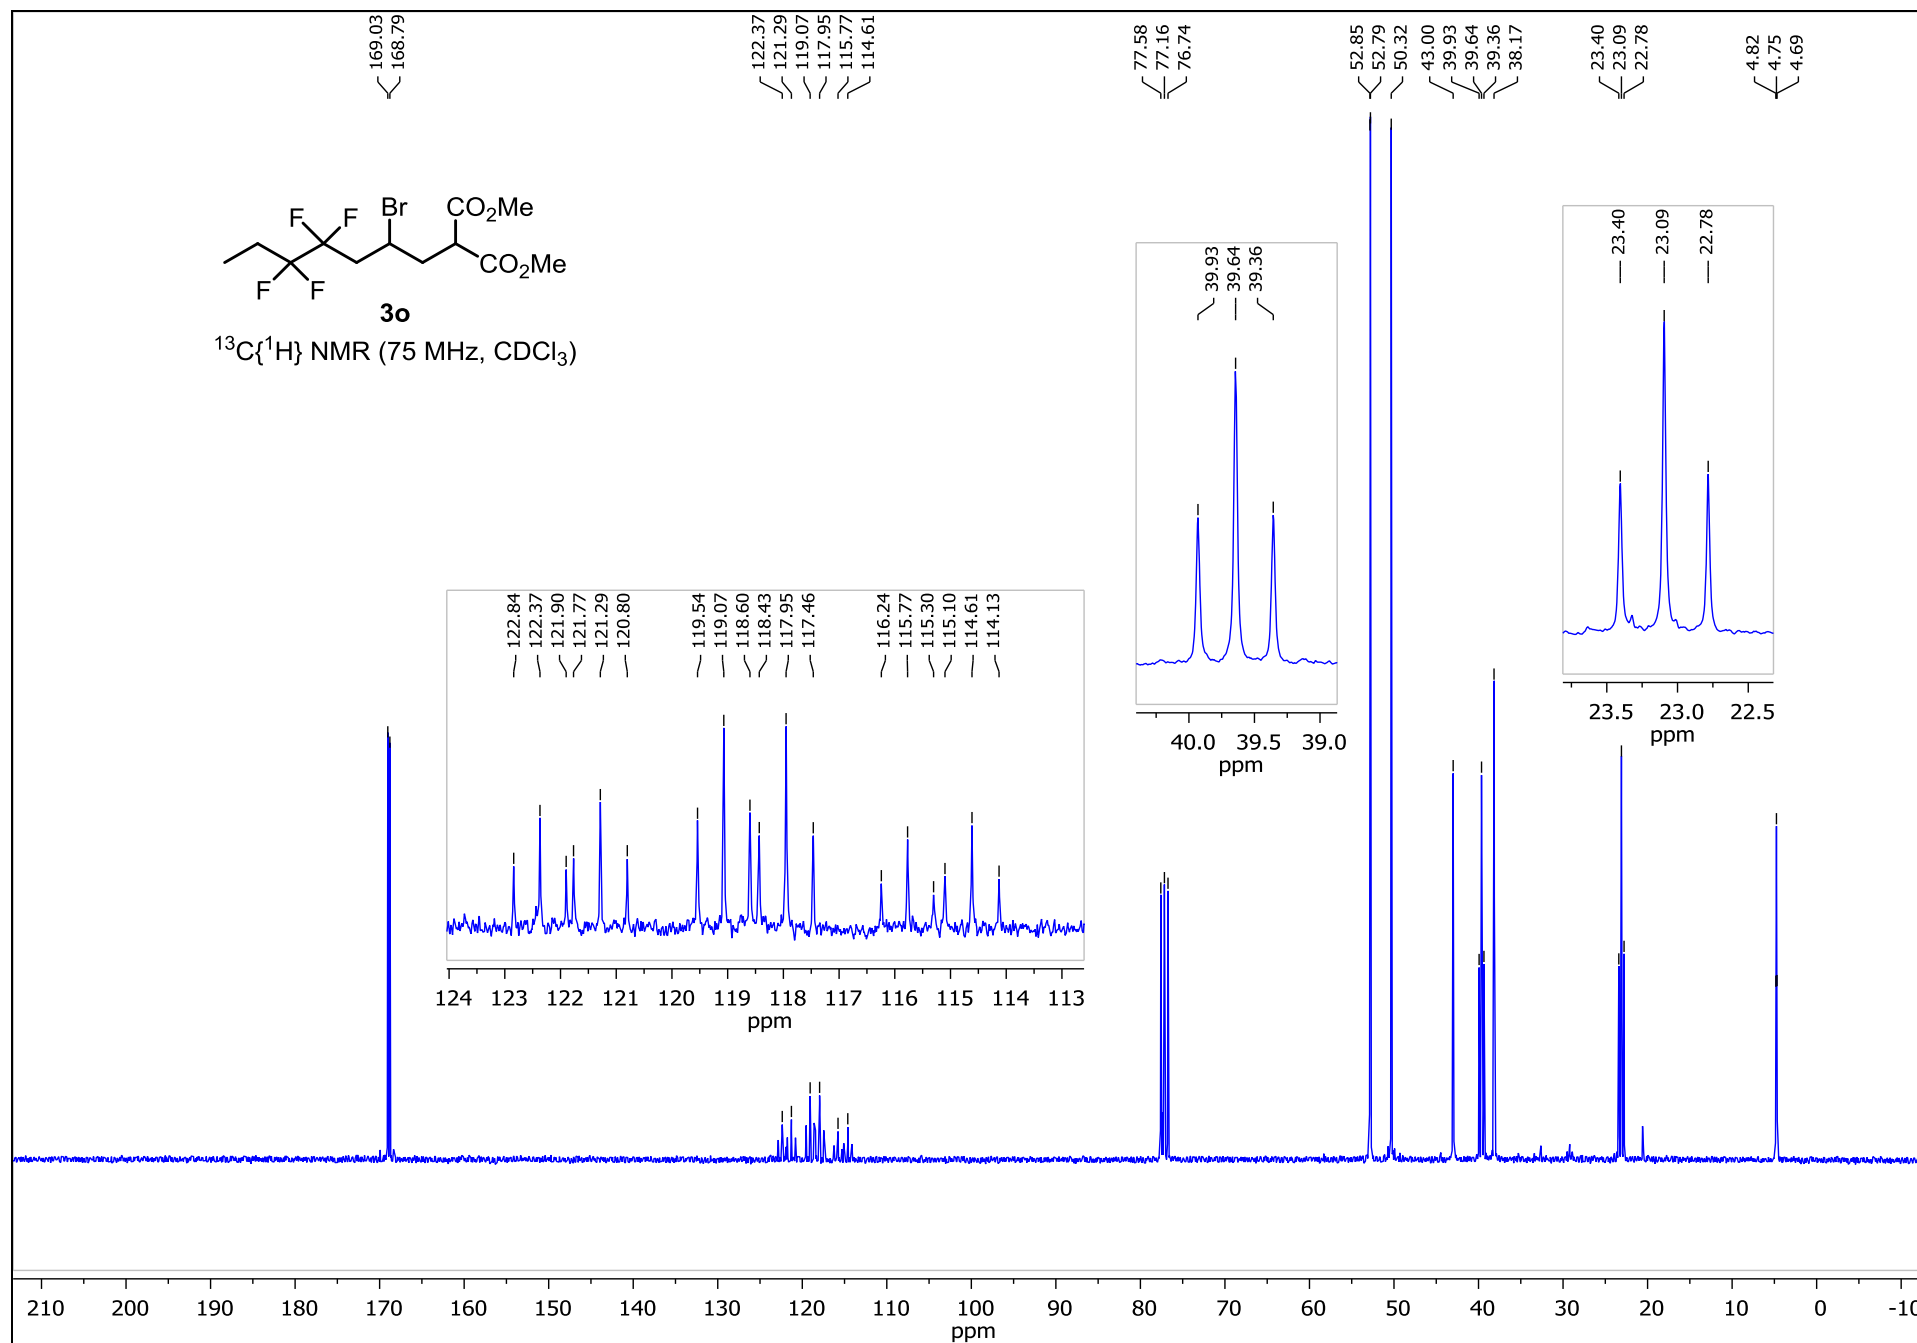

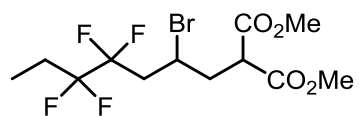**3o**<sup>19</sup>F NMR (282 MHz, CDCl<sub>3</sub>)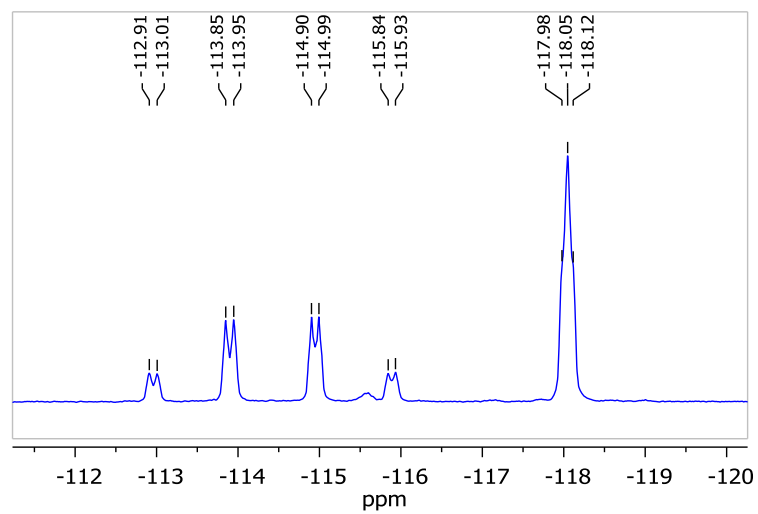

-112.91  
-113.85  
-114.99  
-115.93  
-118.05

10 0 -10 -20 -30 -40 -50 -60 -70 -80 -90 -100 -110 -120 -130 -140 -150 -160 -170 -180 -190 -200 -210  
ppm

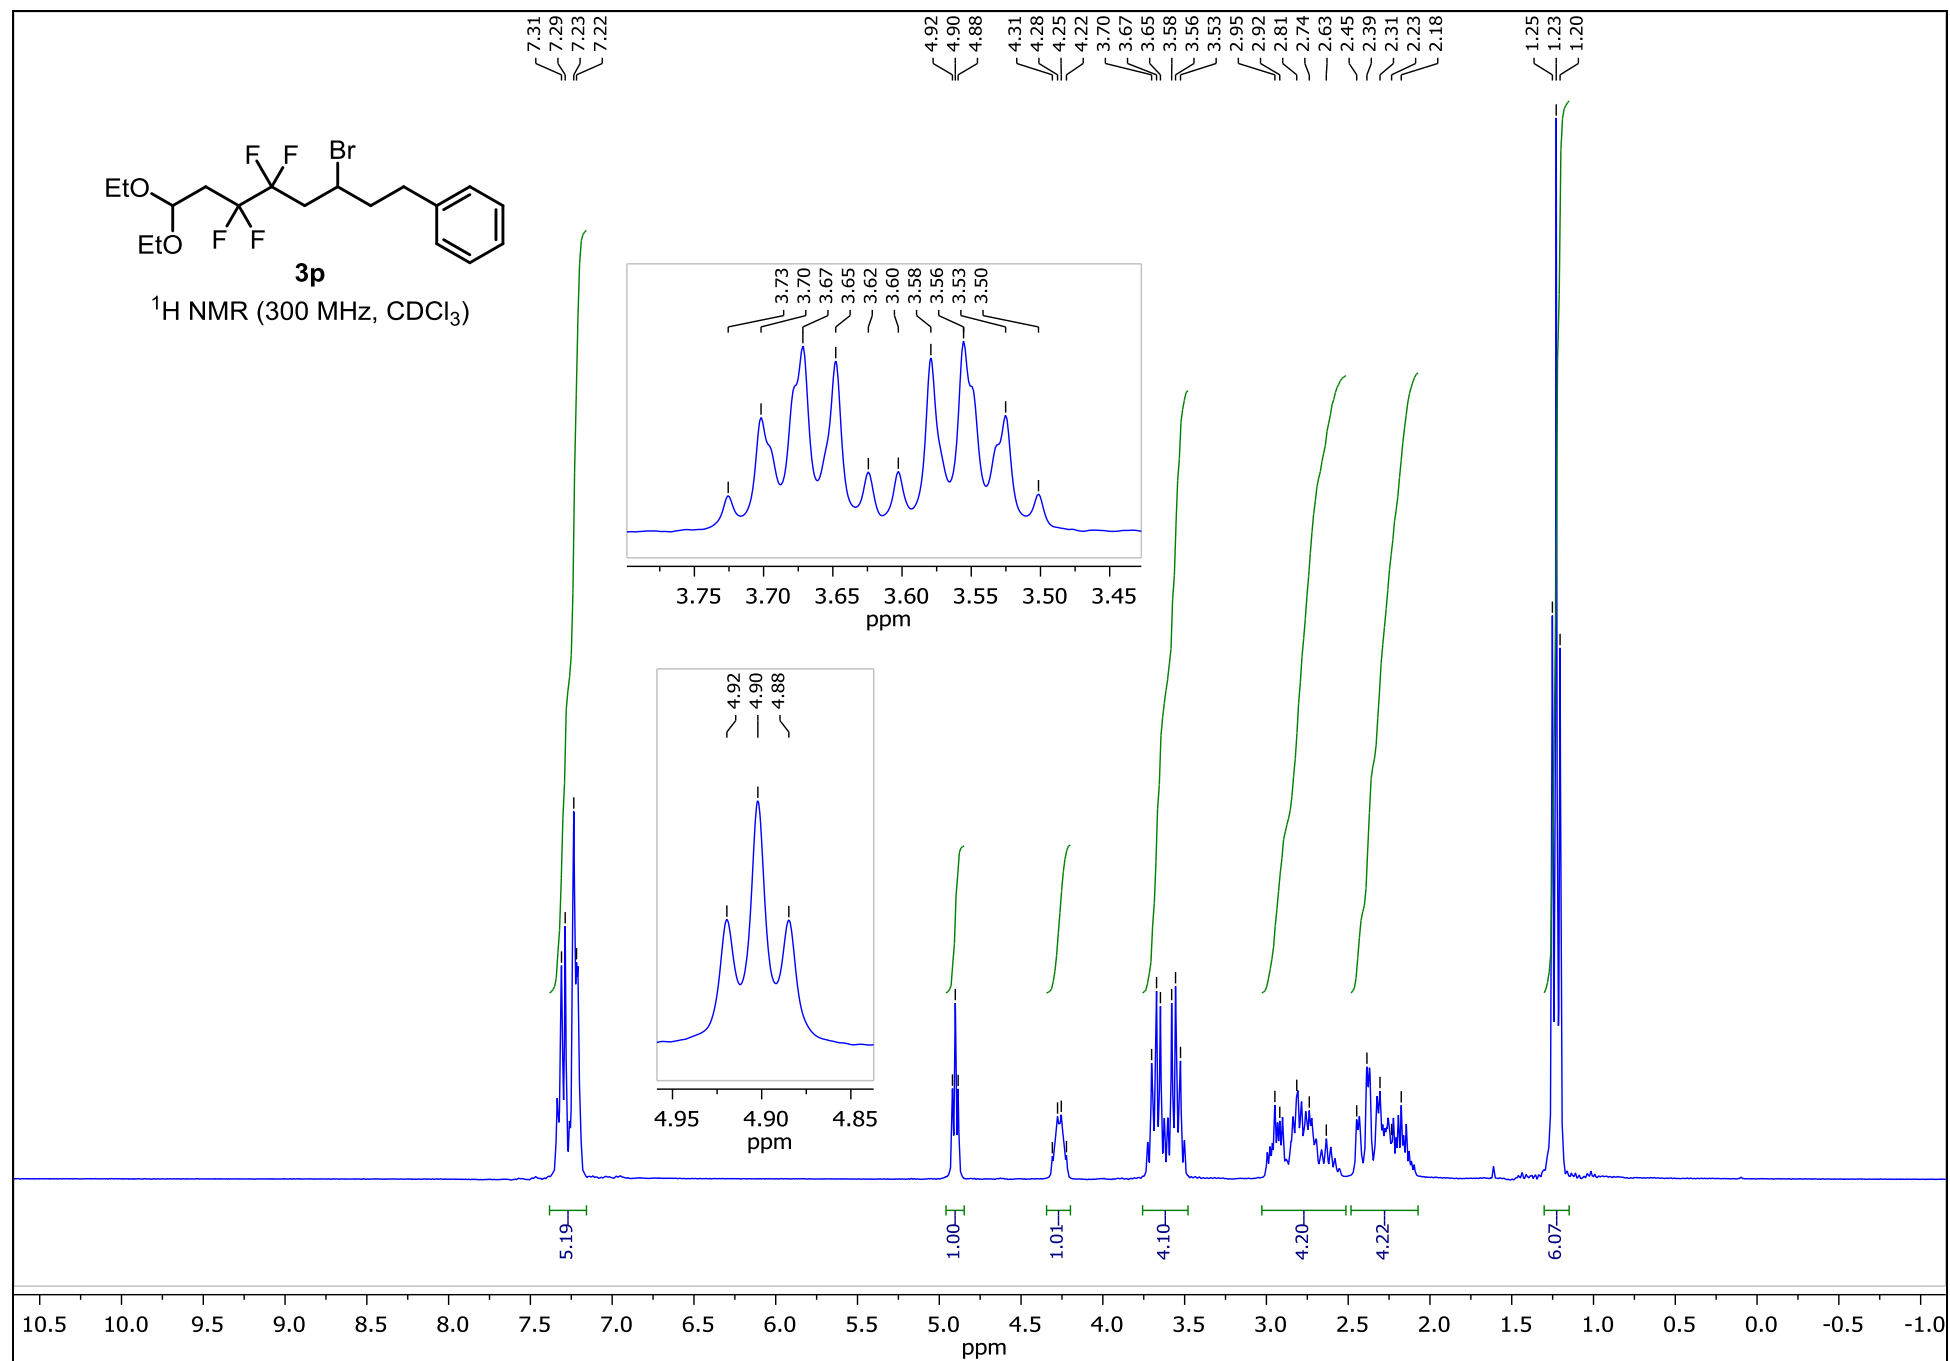

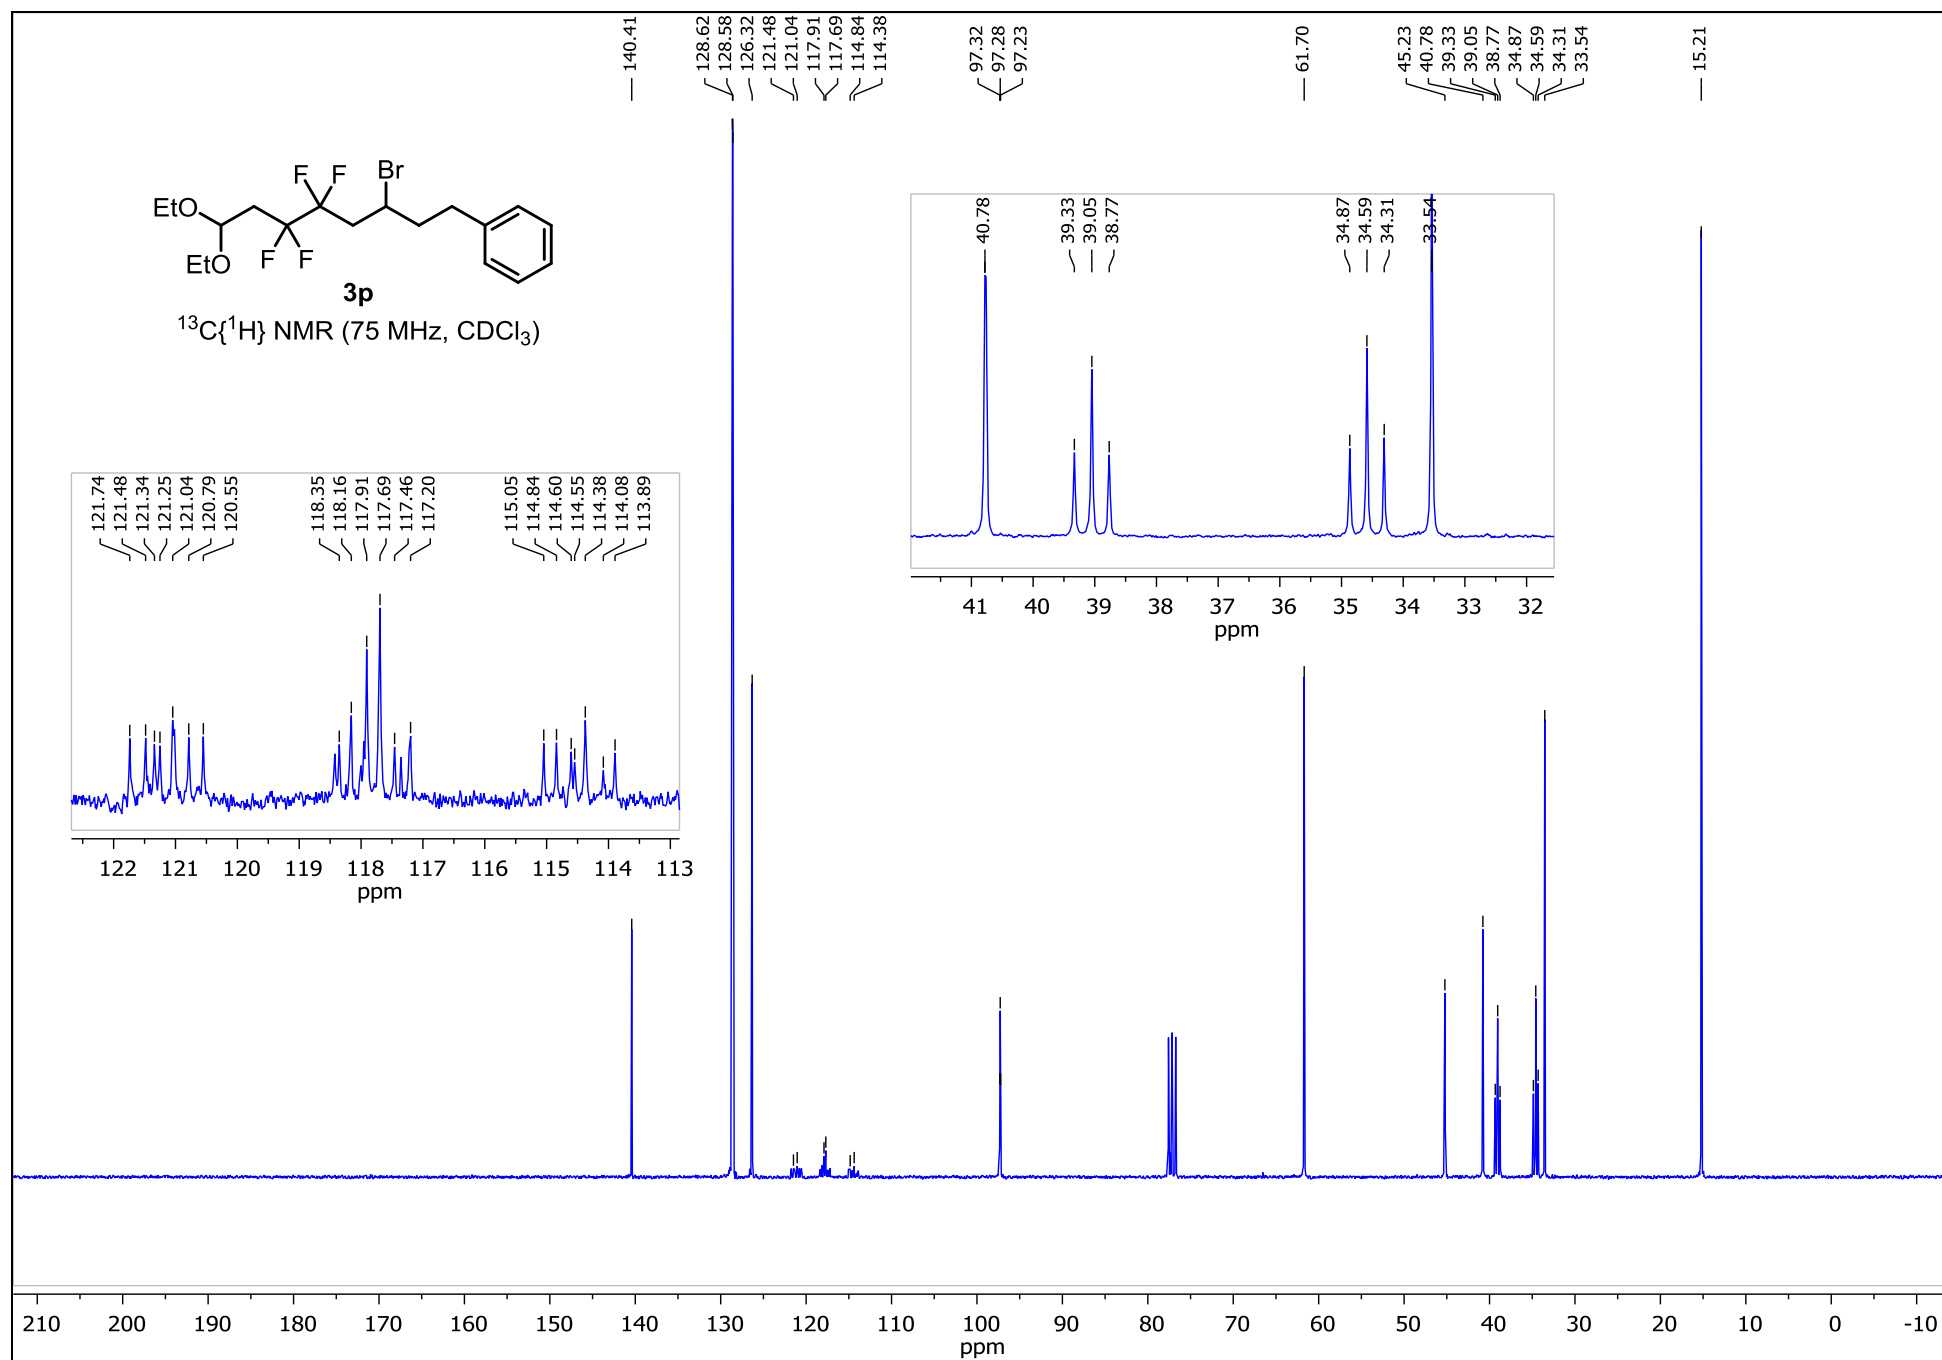

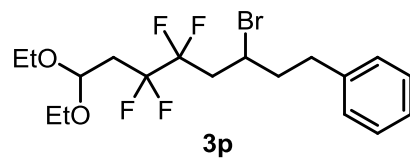

$^{19}\text{F}$  NMR (282 MHz,  $\text{CDCl}_3$ )

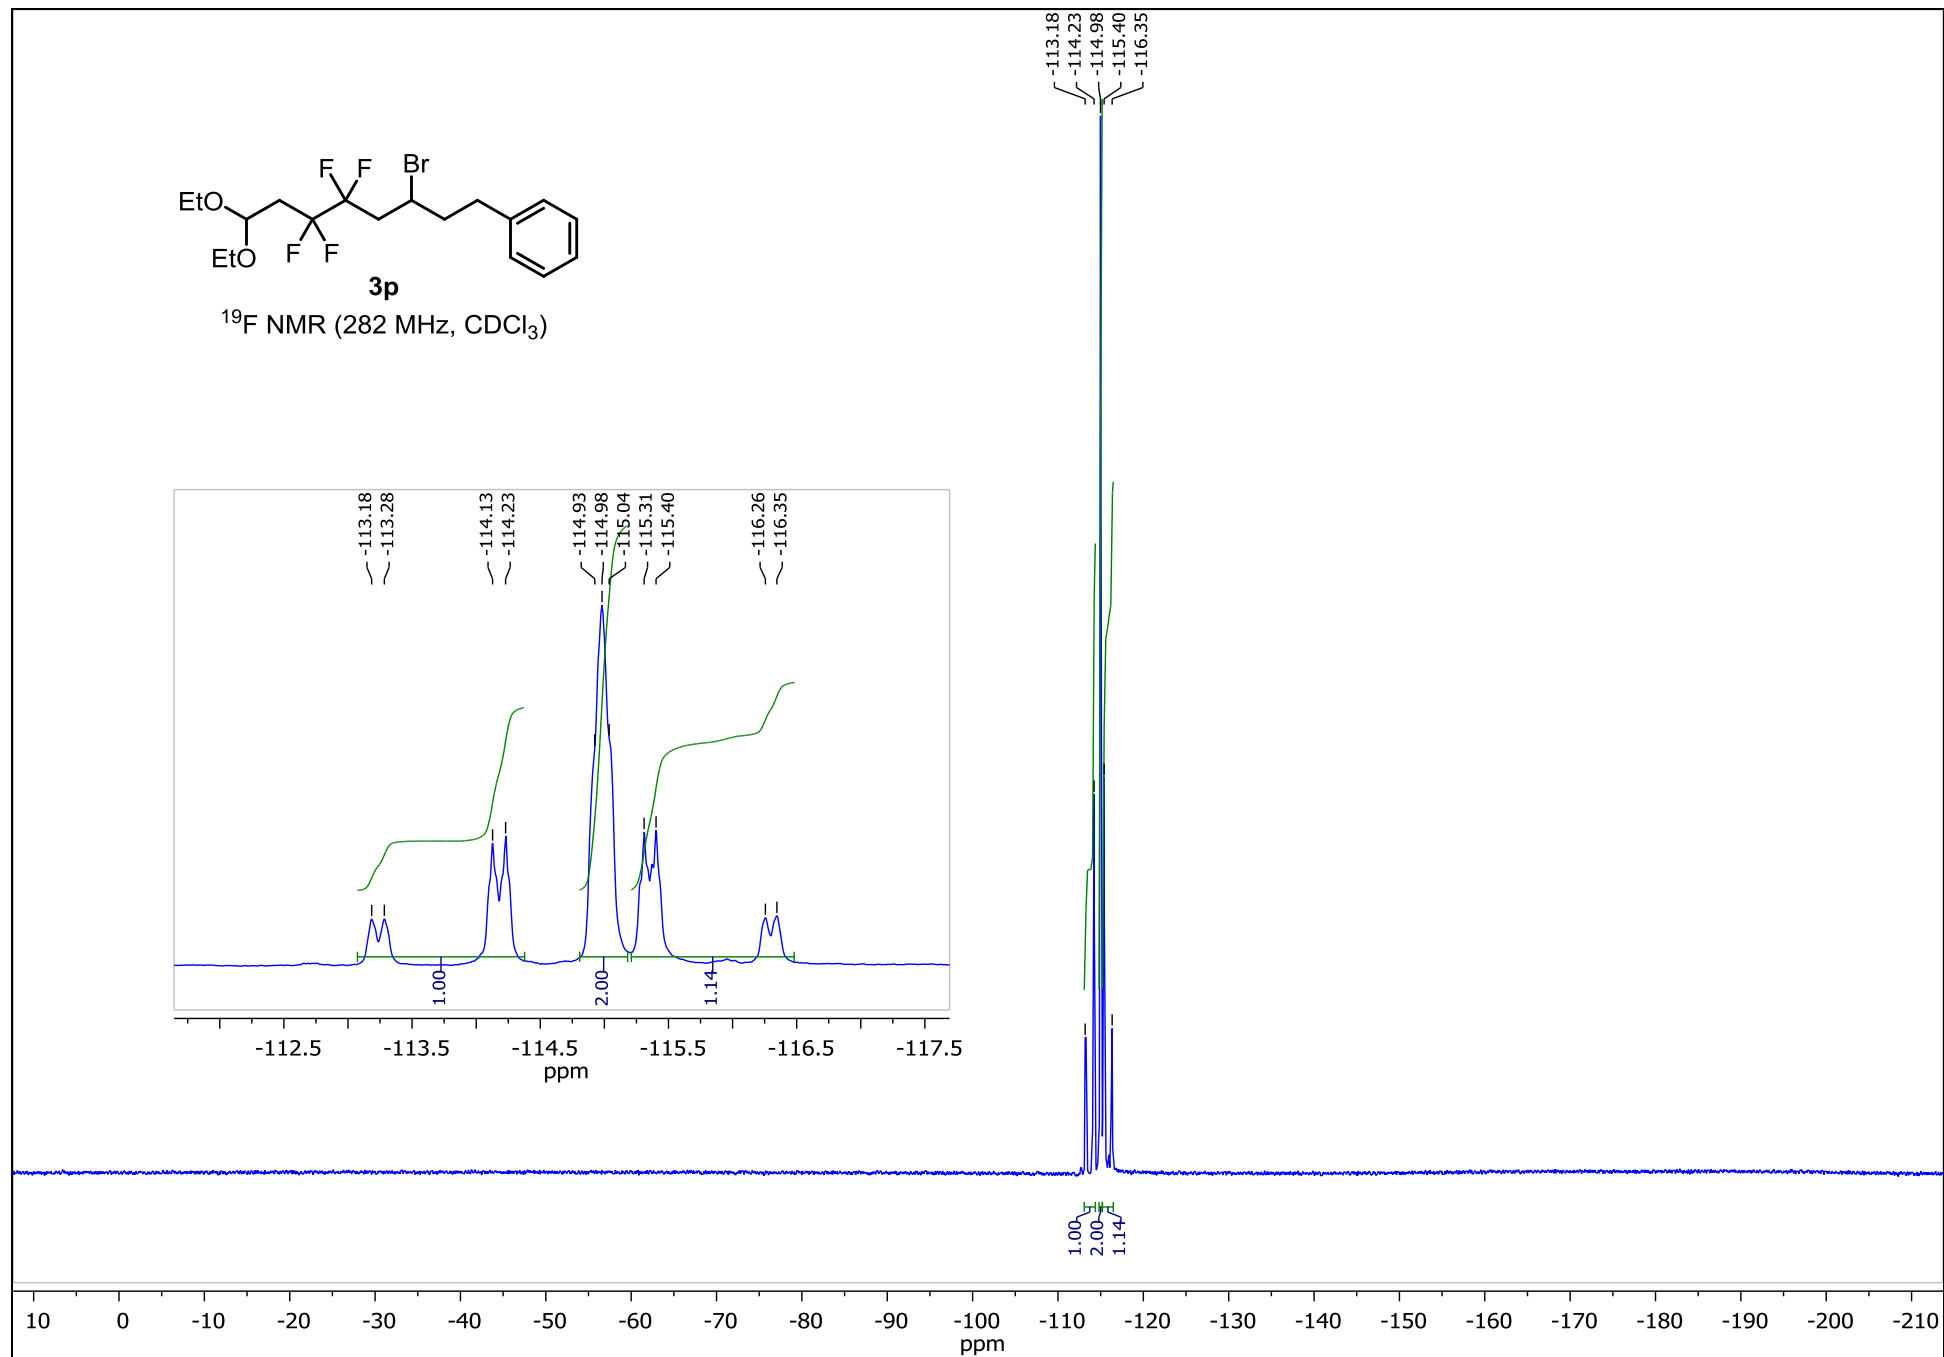



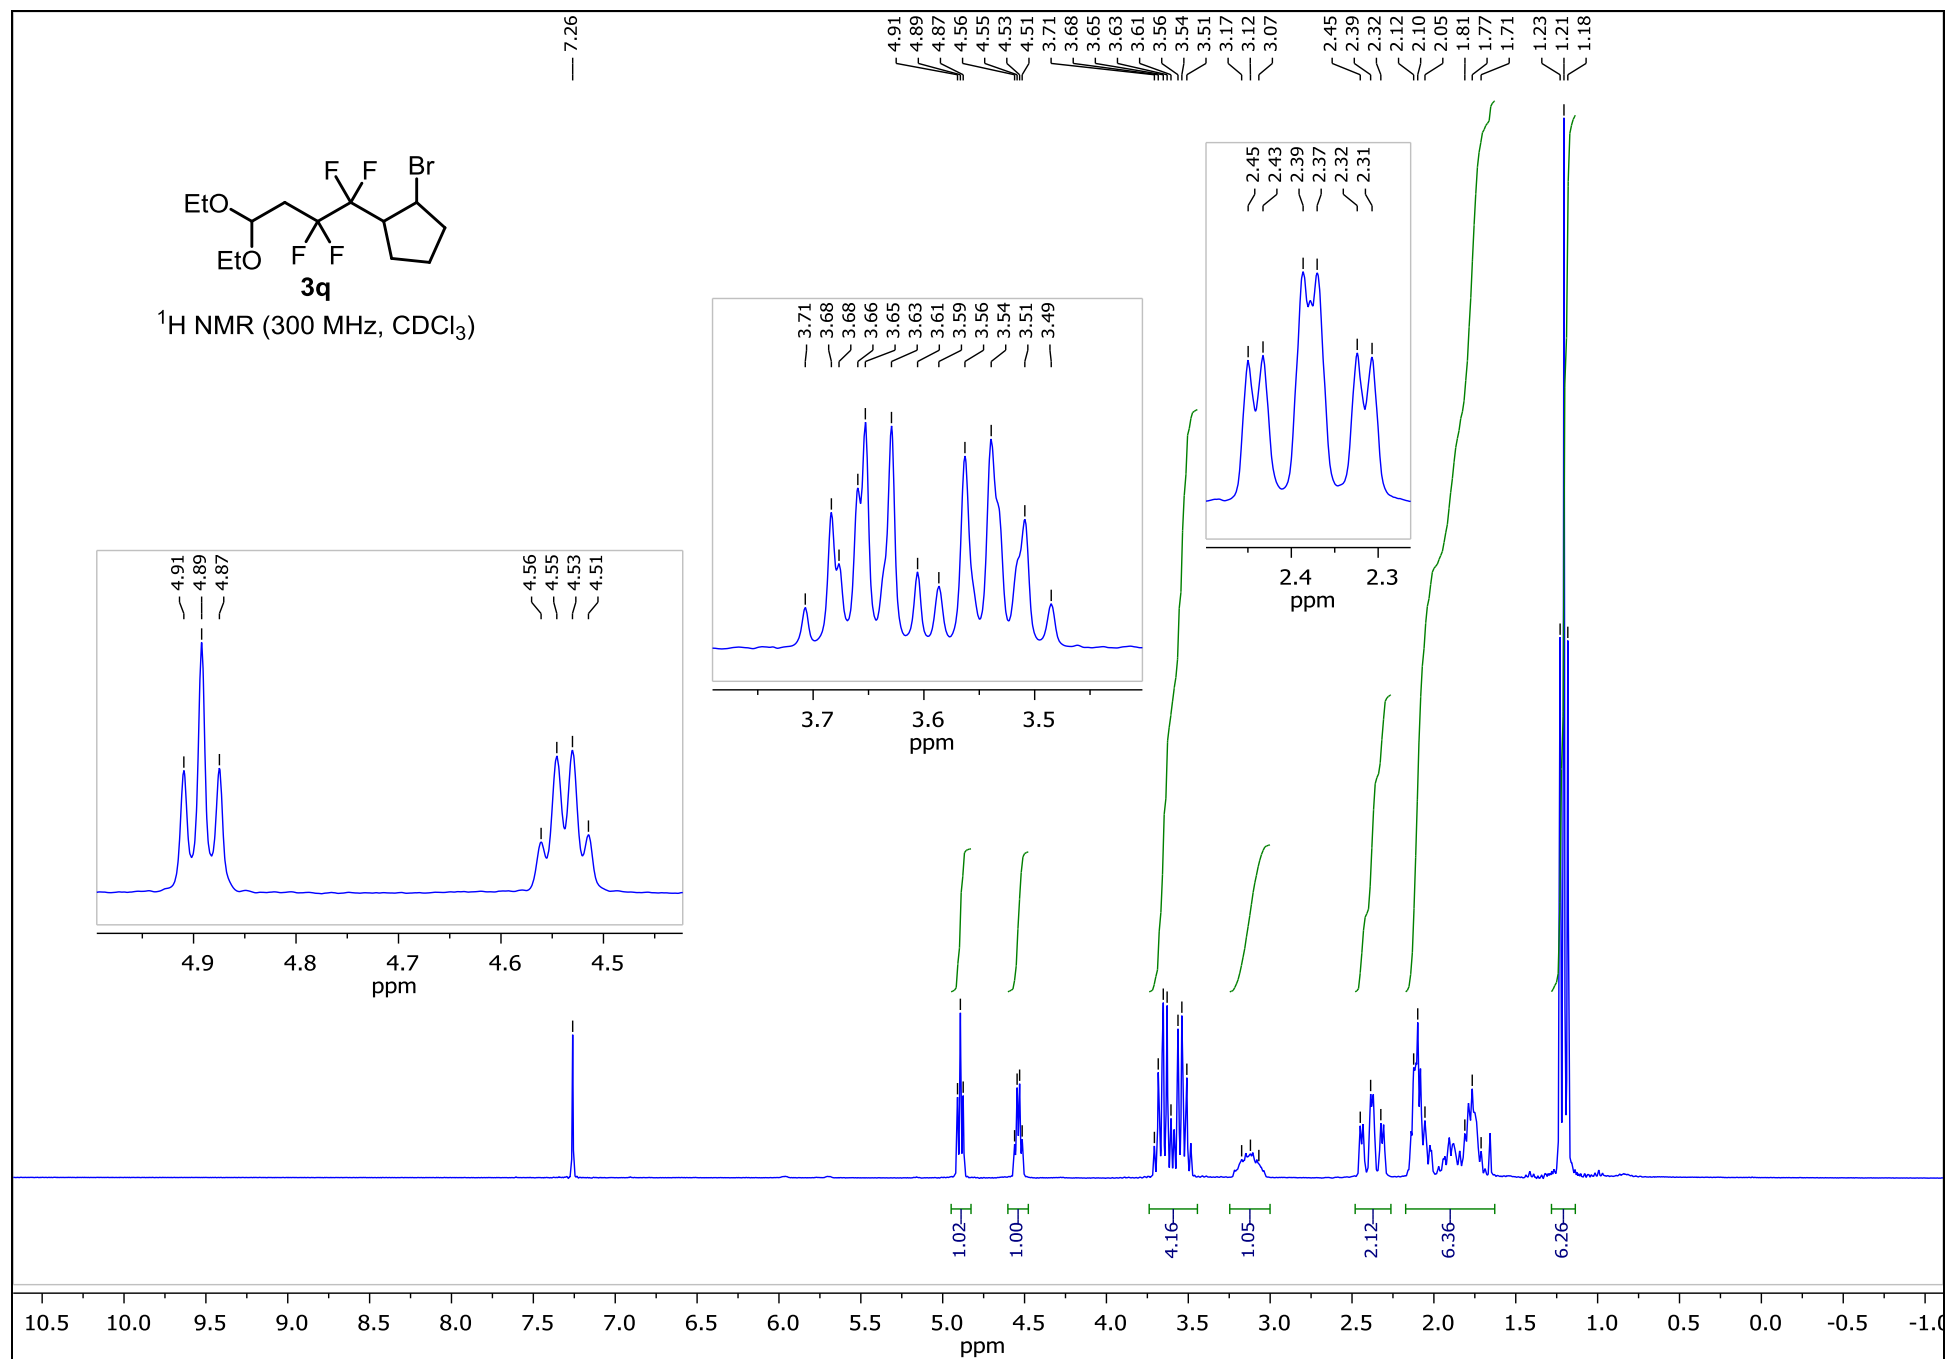

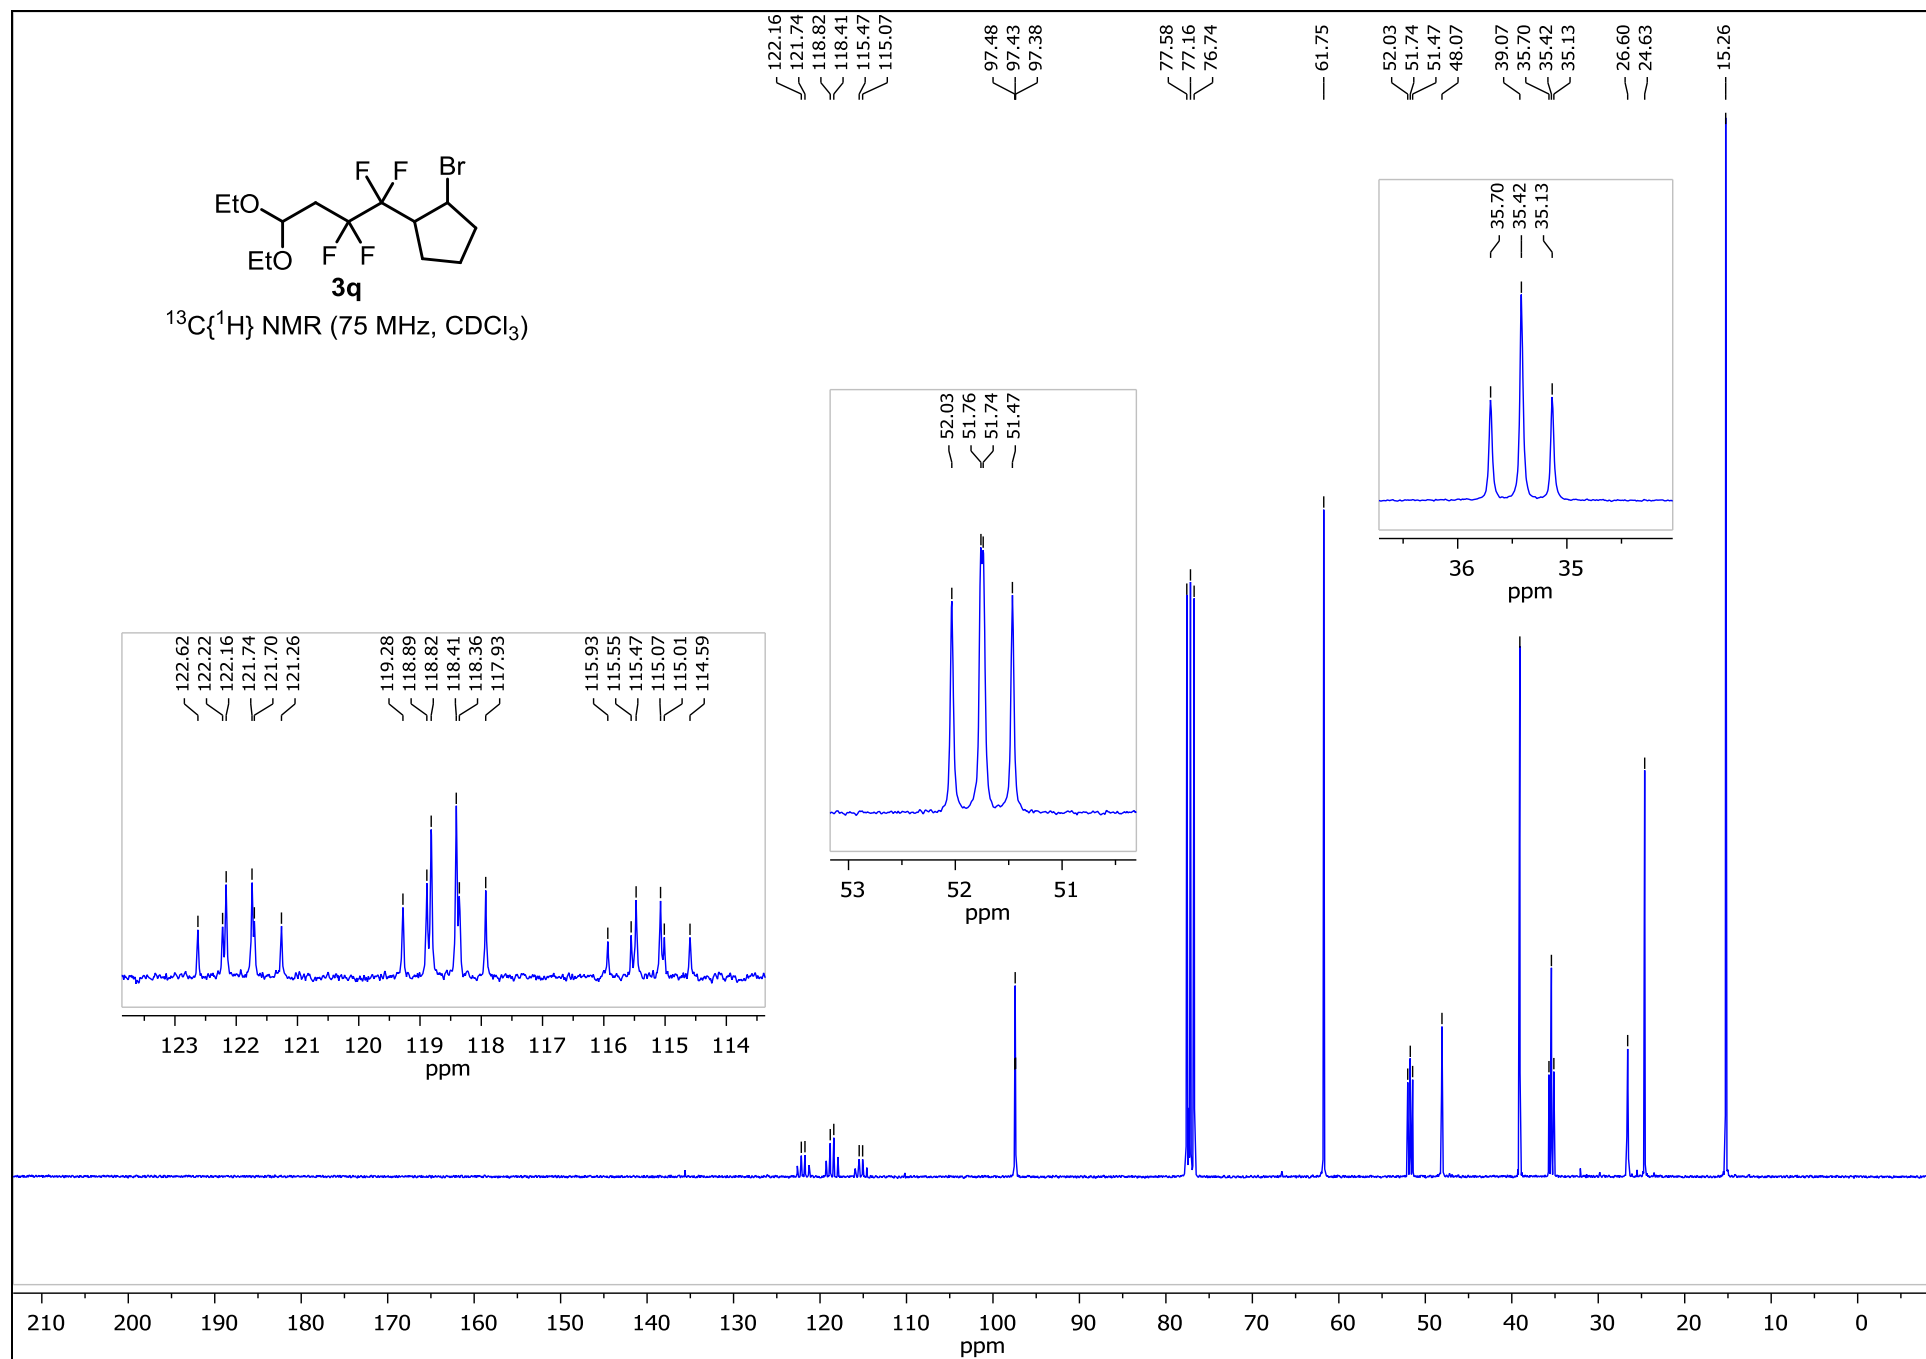

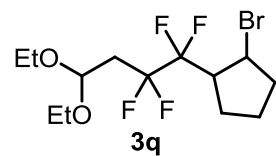

$^{19}\text{F}$  NMR (282 MHz,  $\text{CDCl}_3$ )

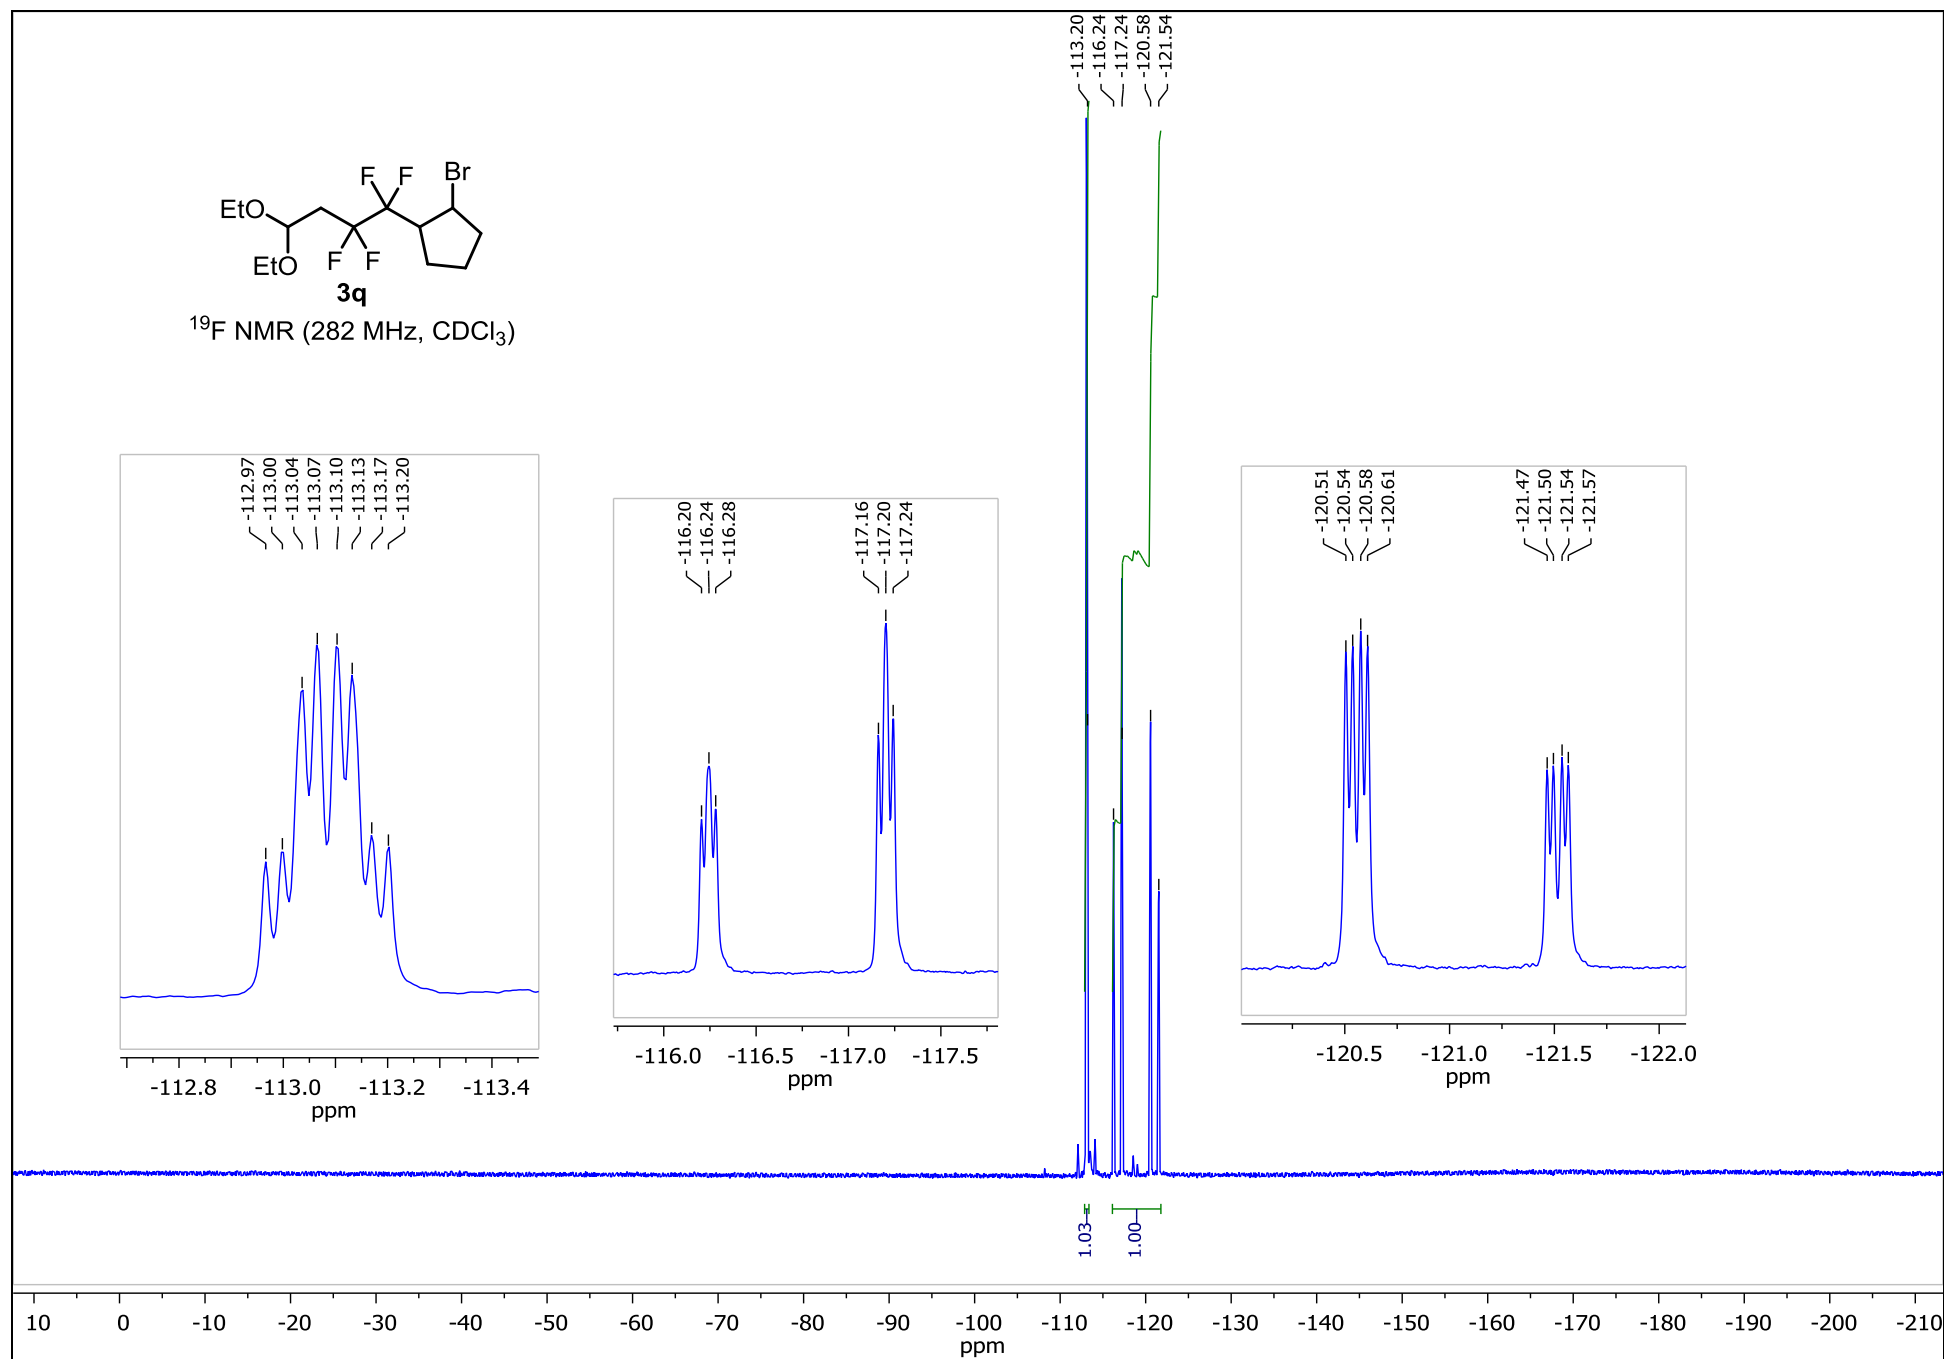

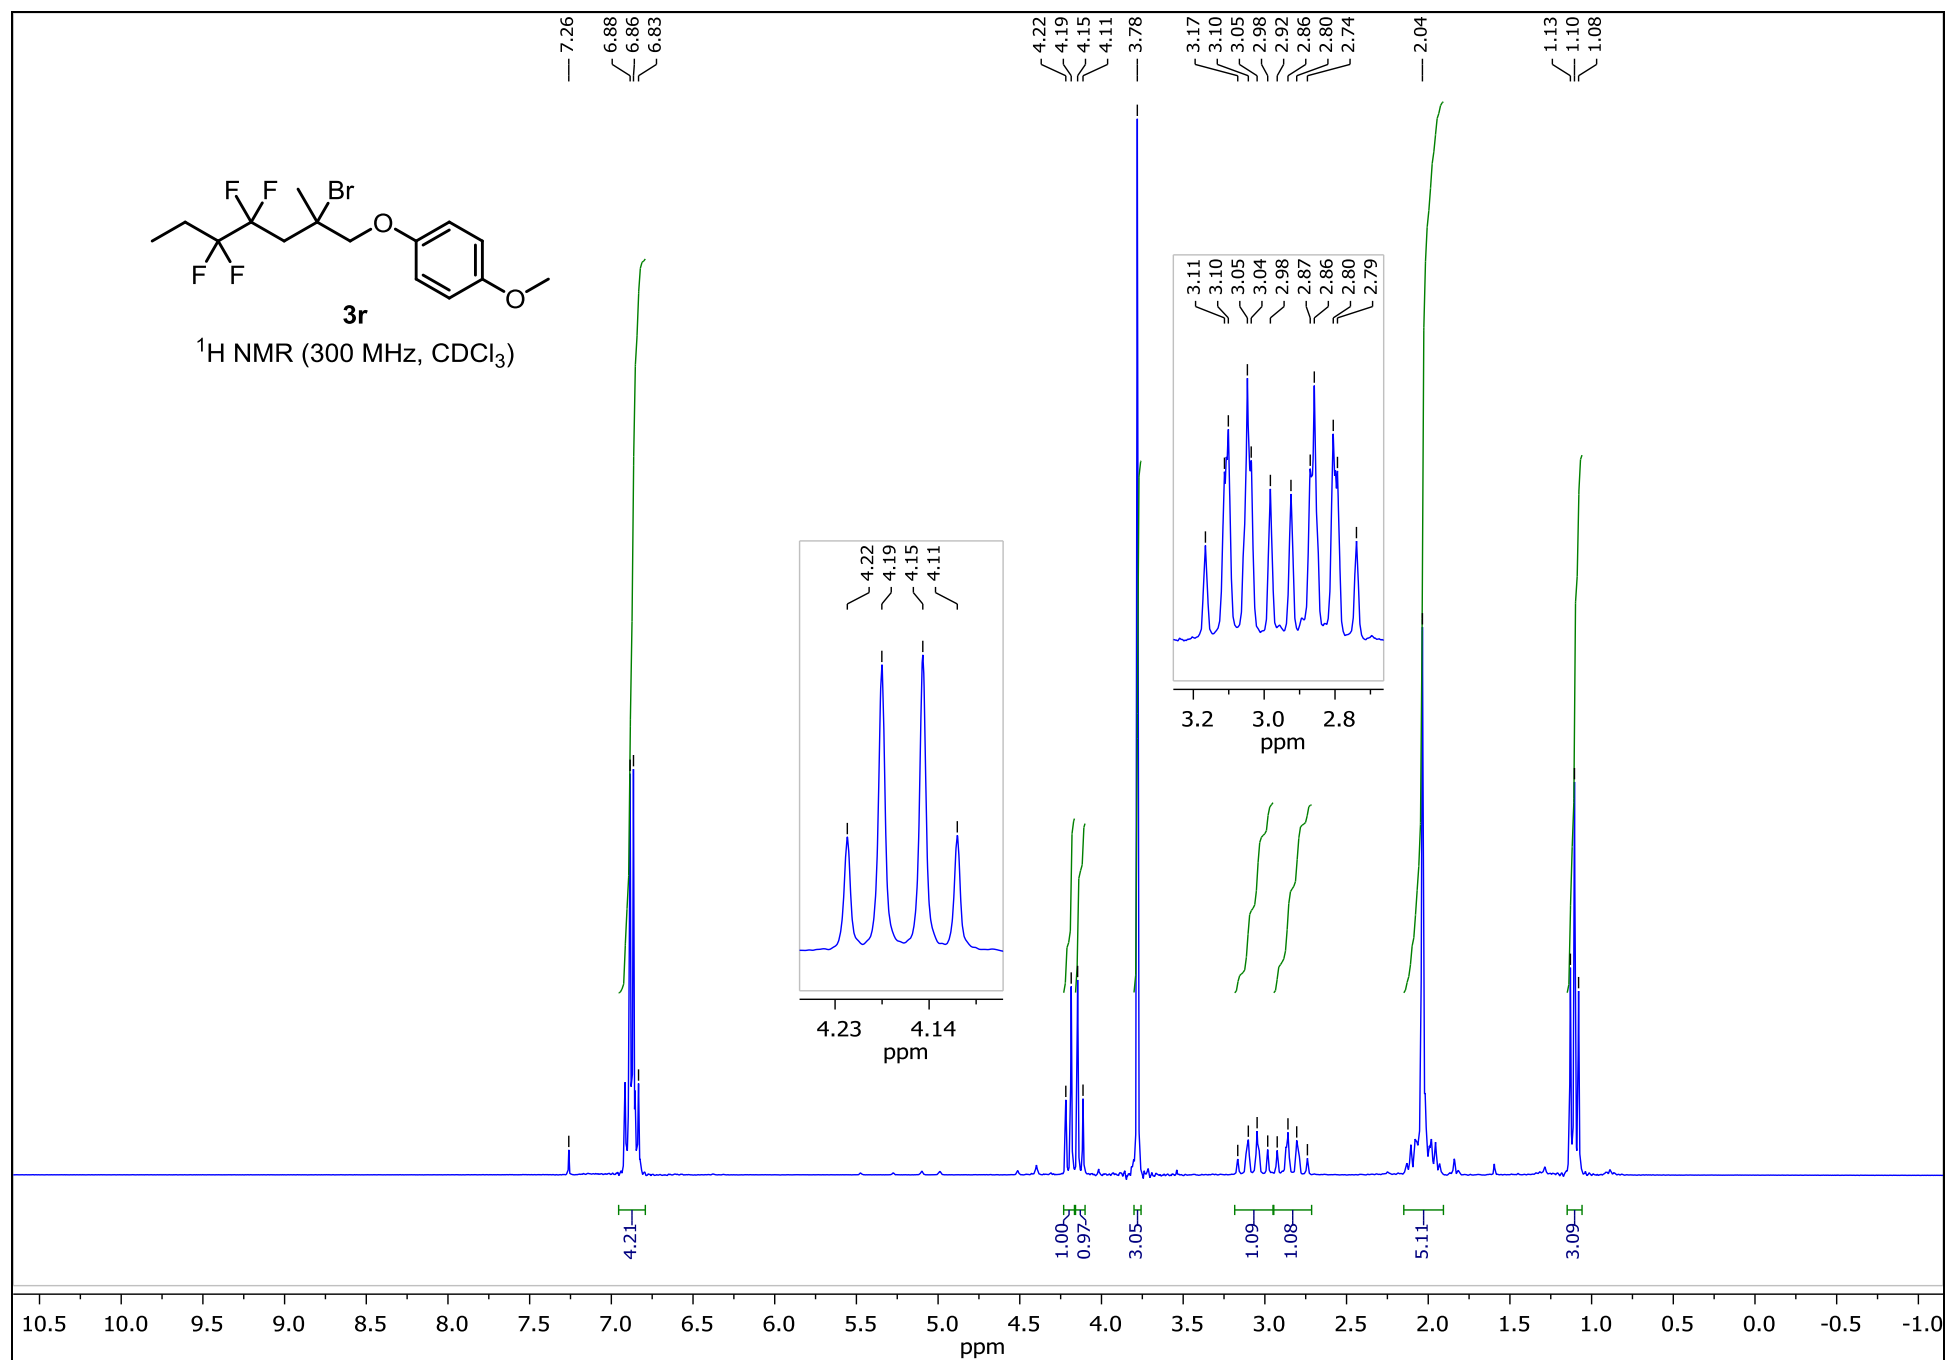

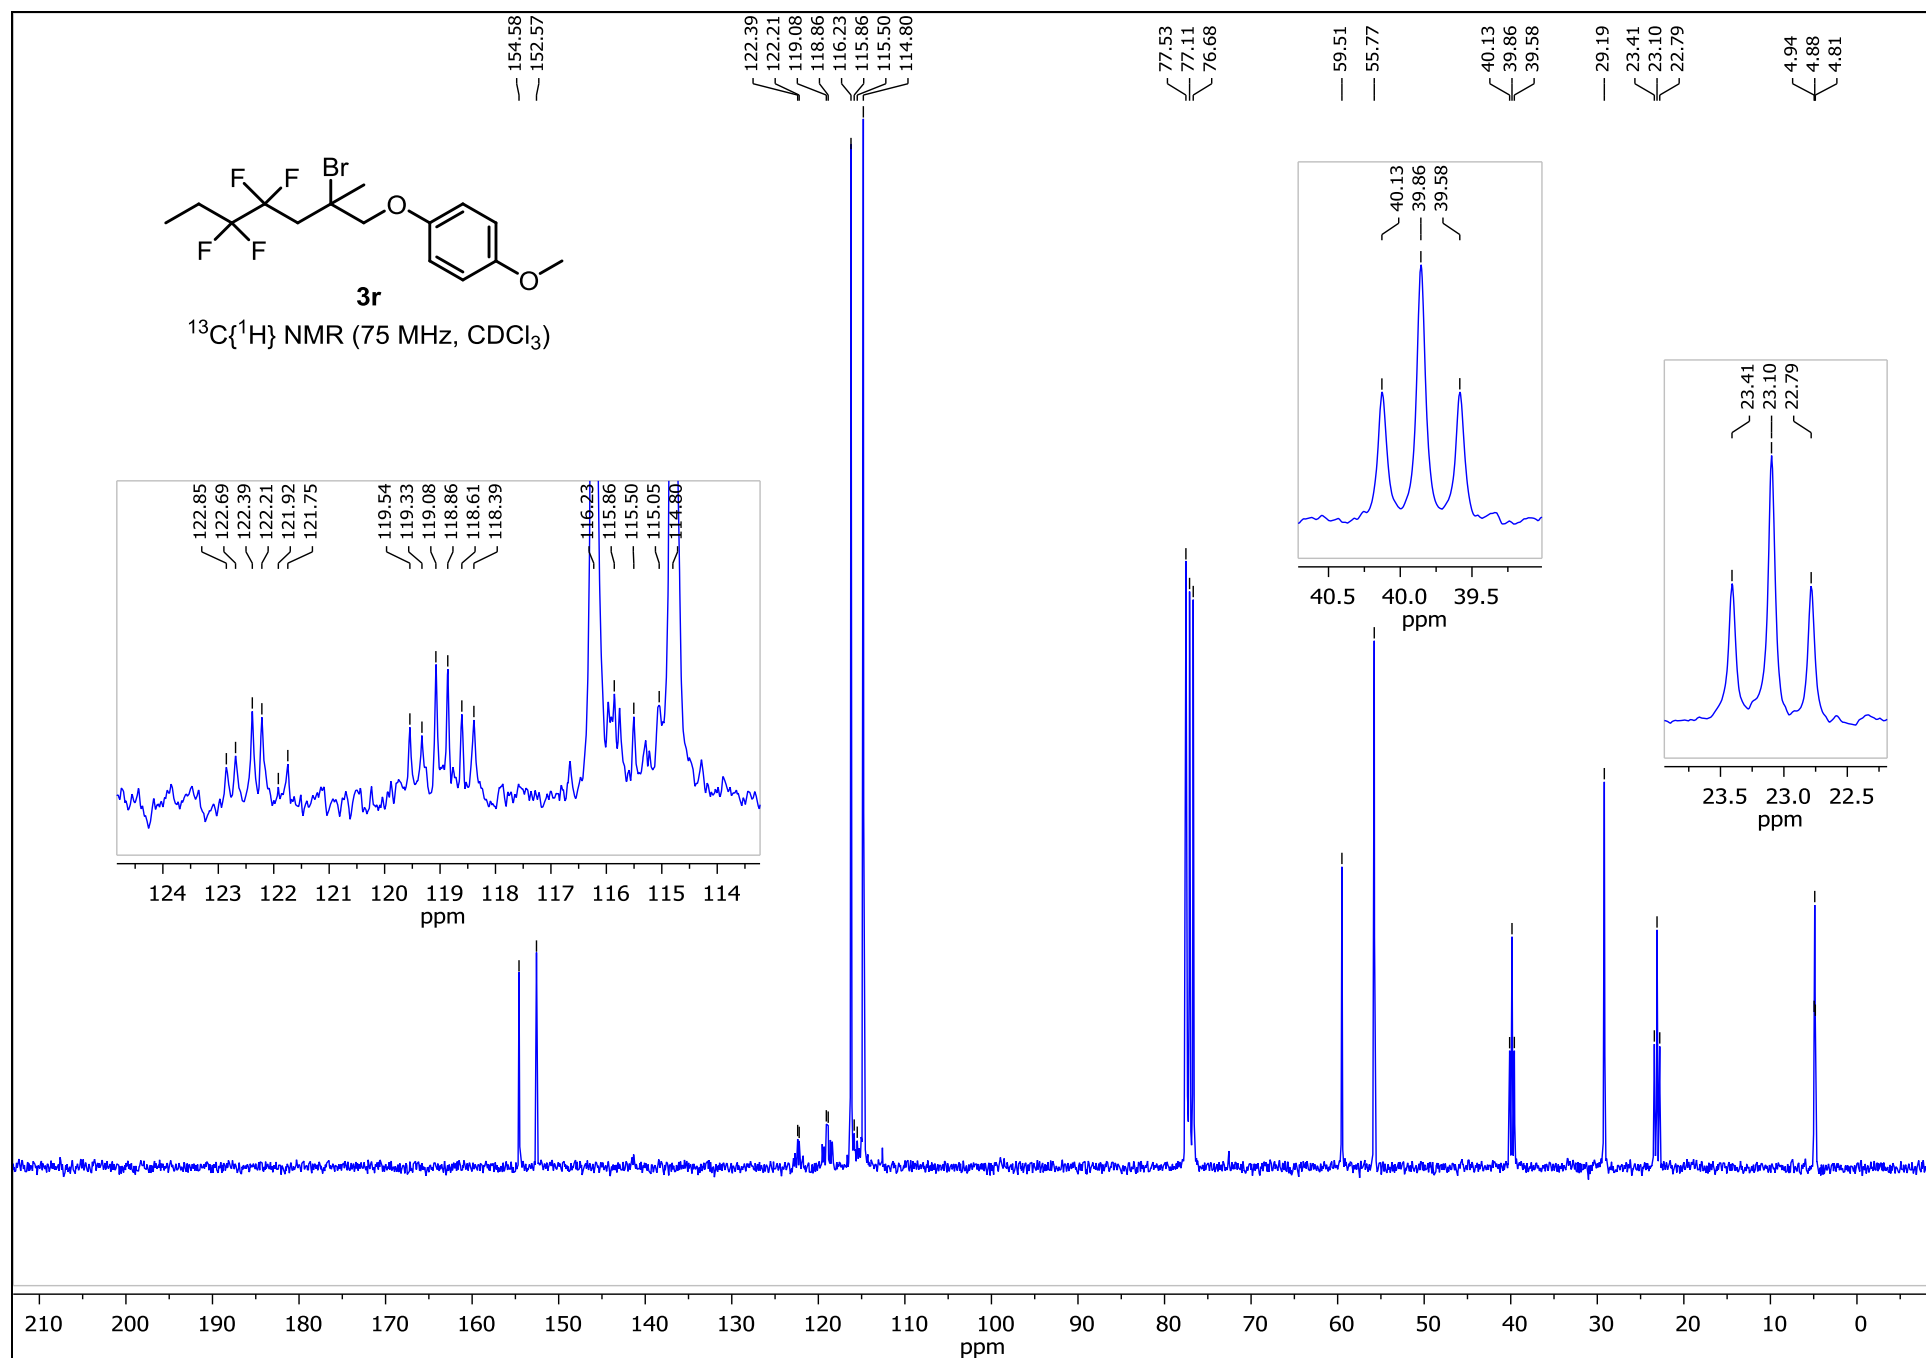

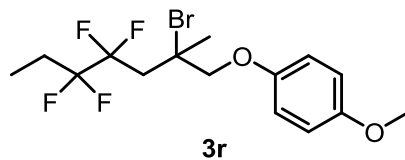

$^{19}\text{F}$  NMR (282 MHz,  $\text{CDCl}_3$ )

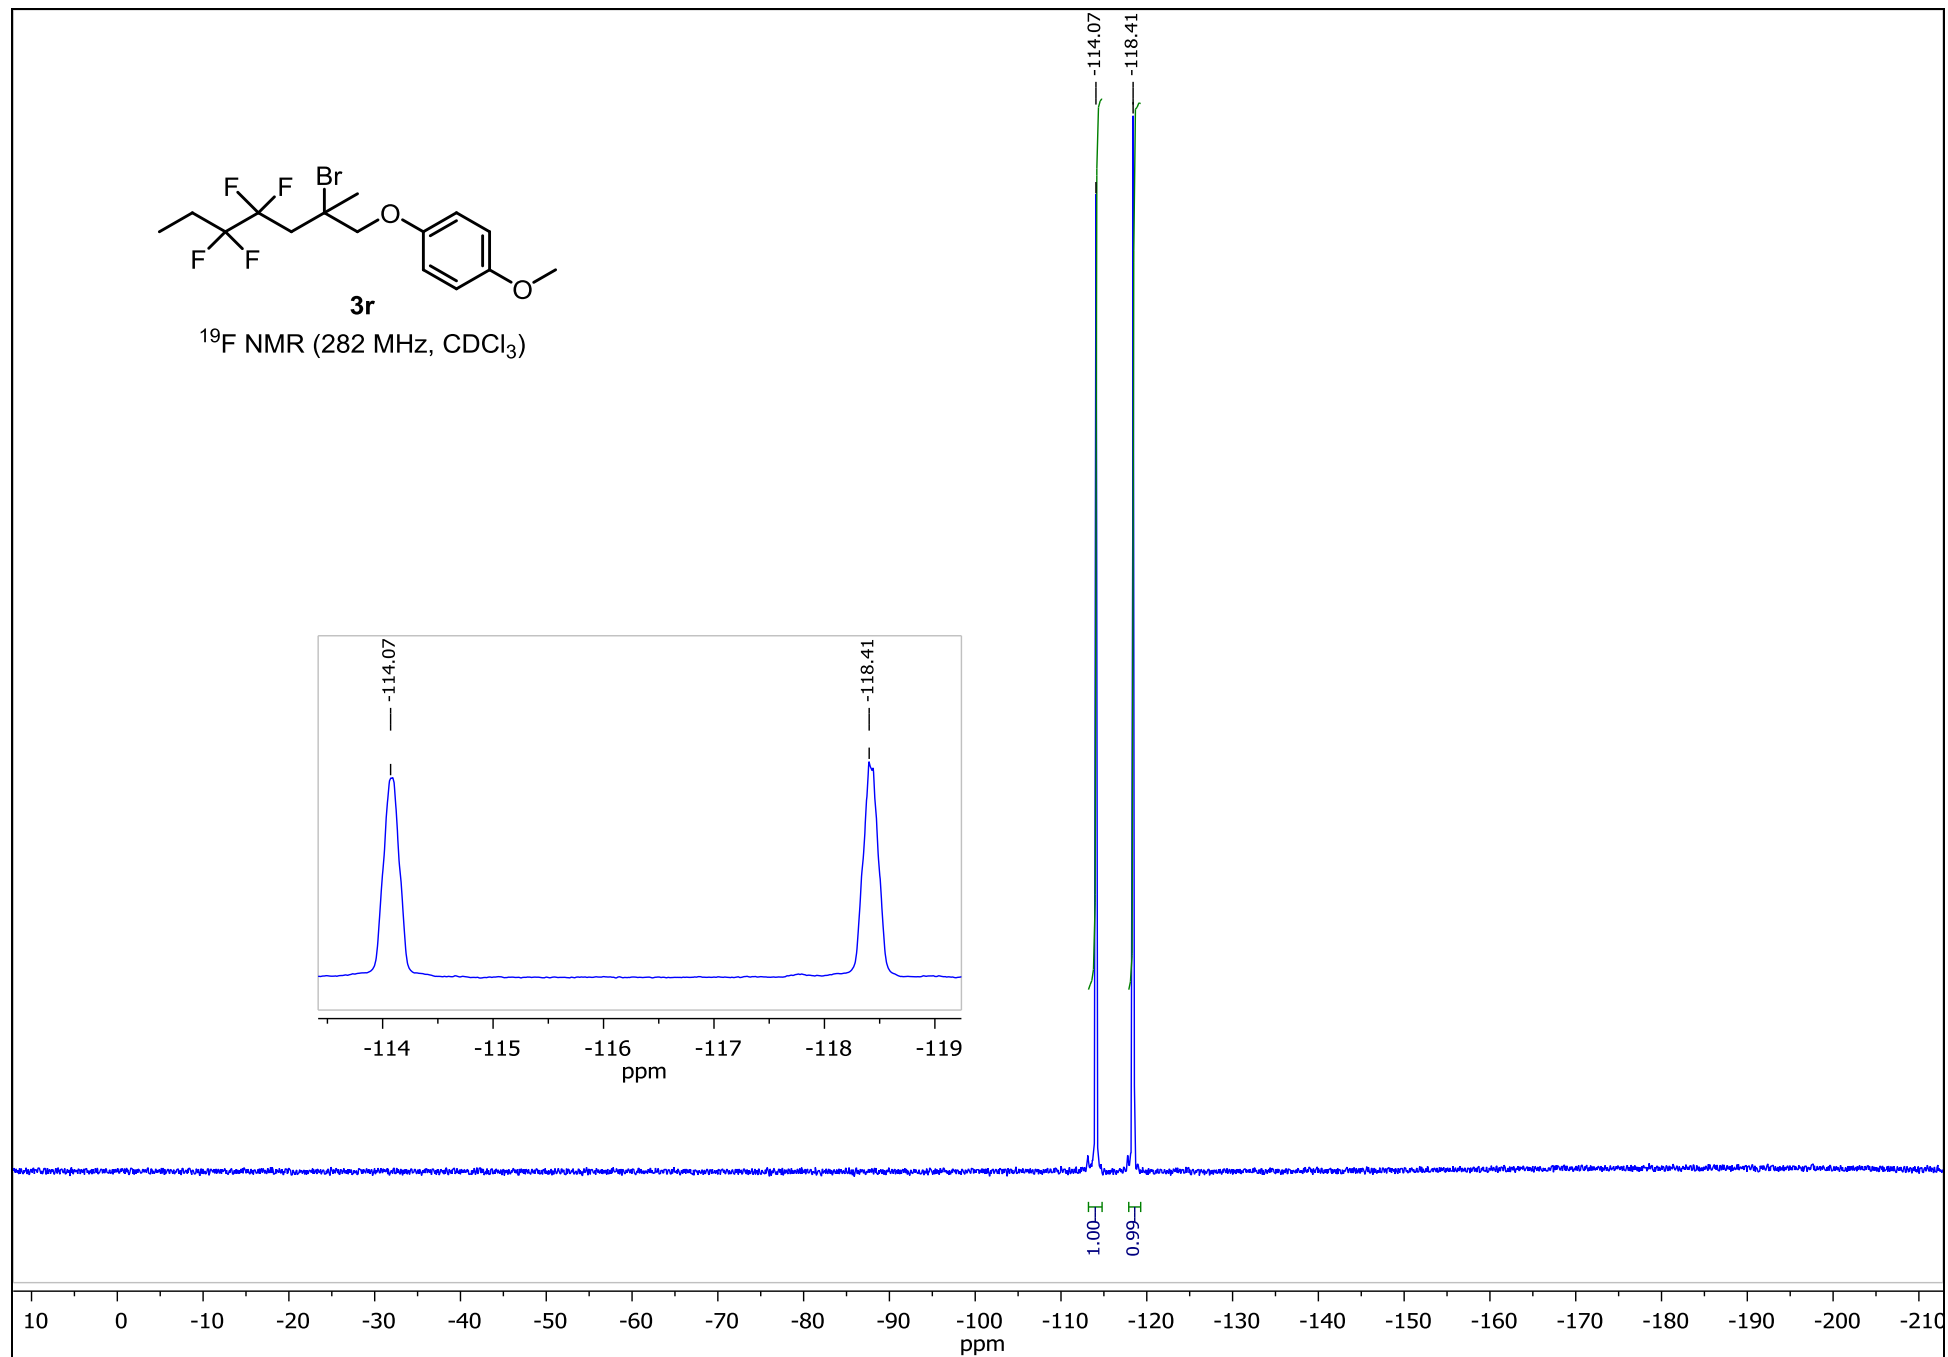

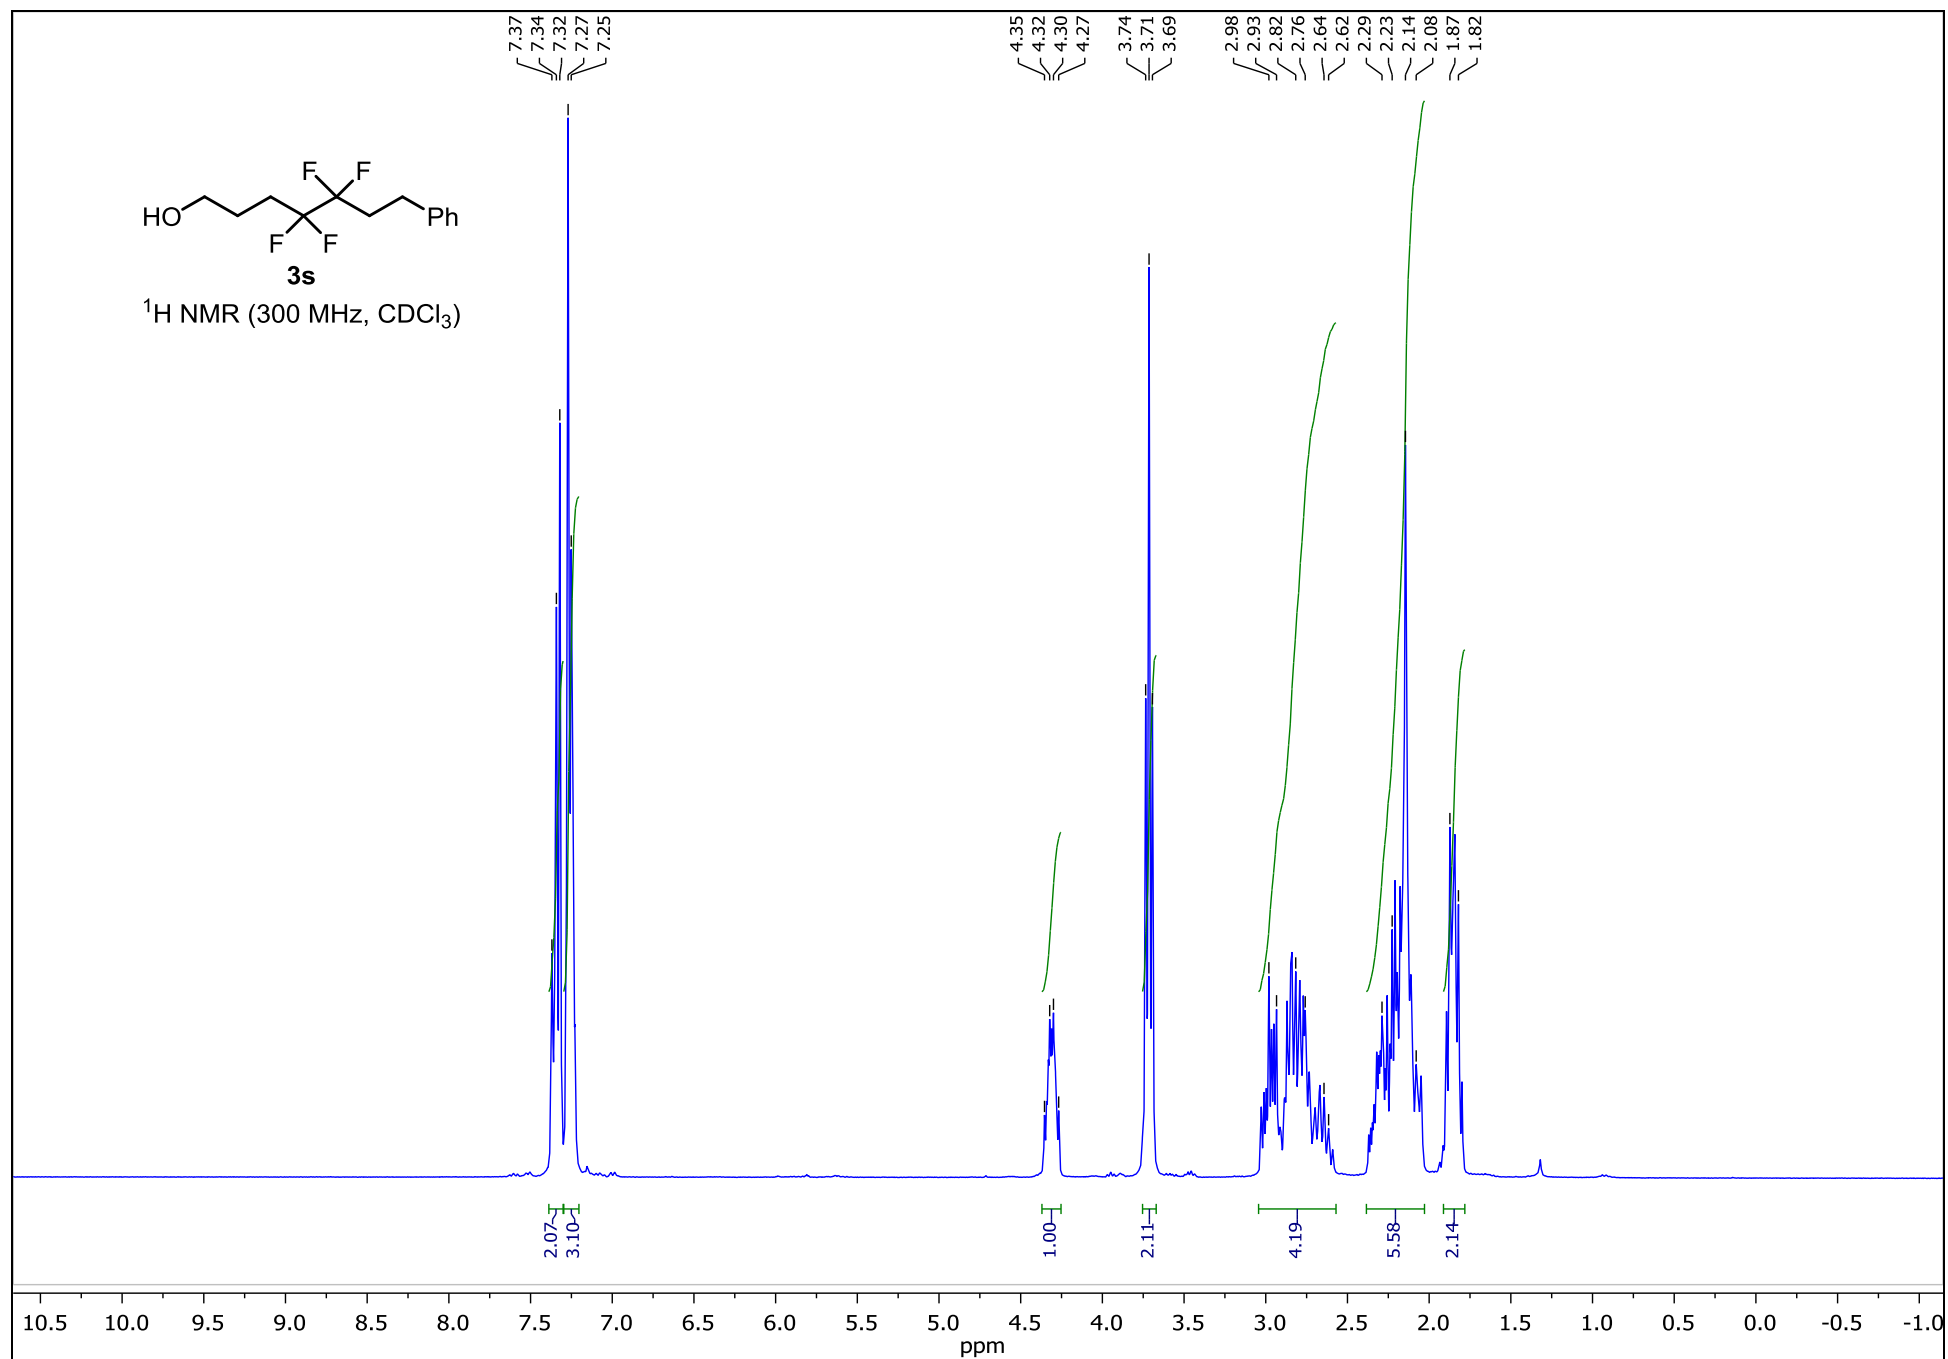

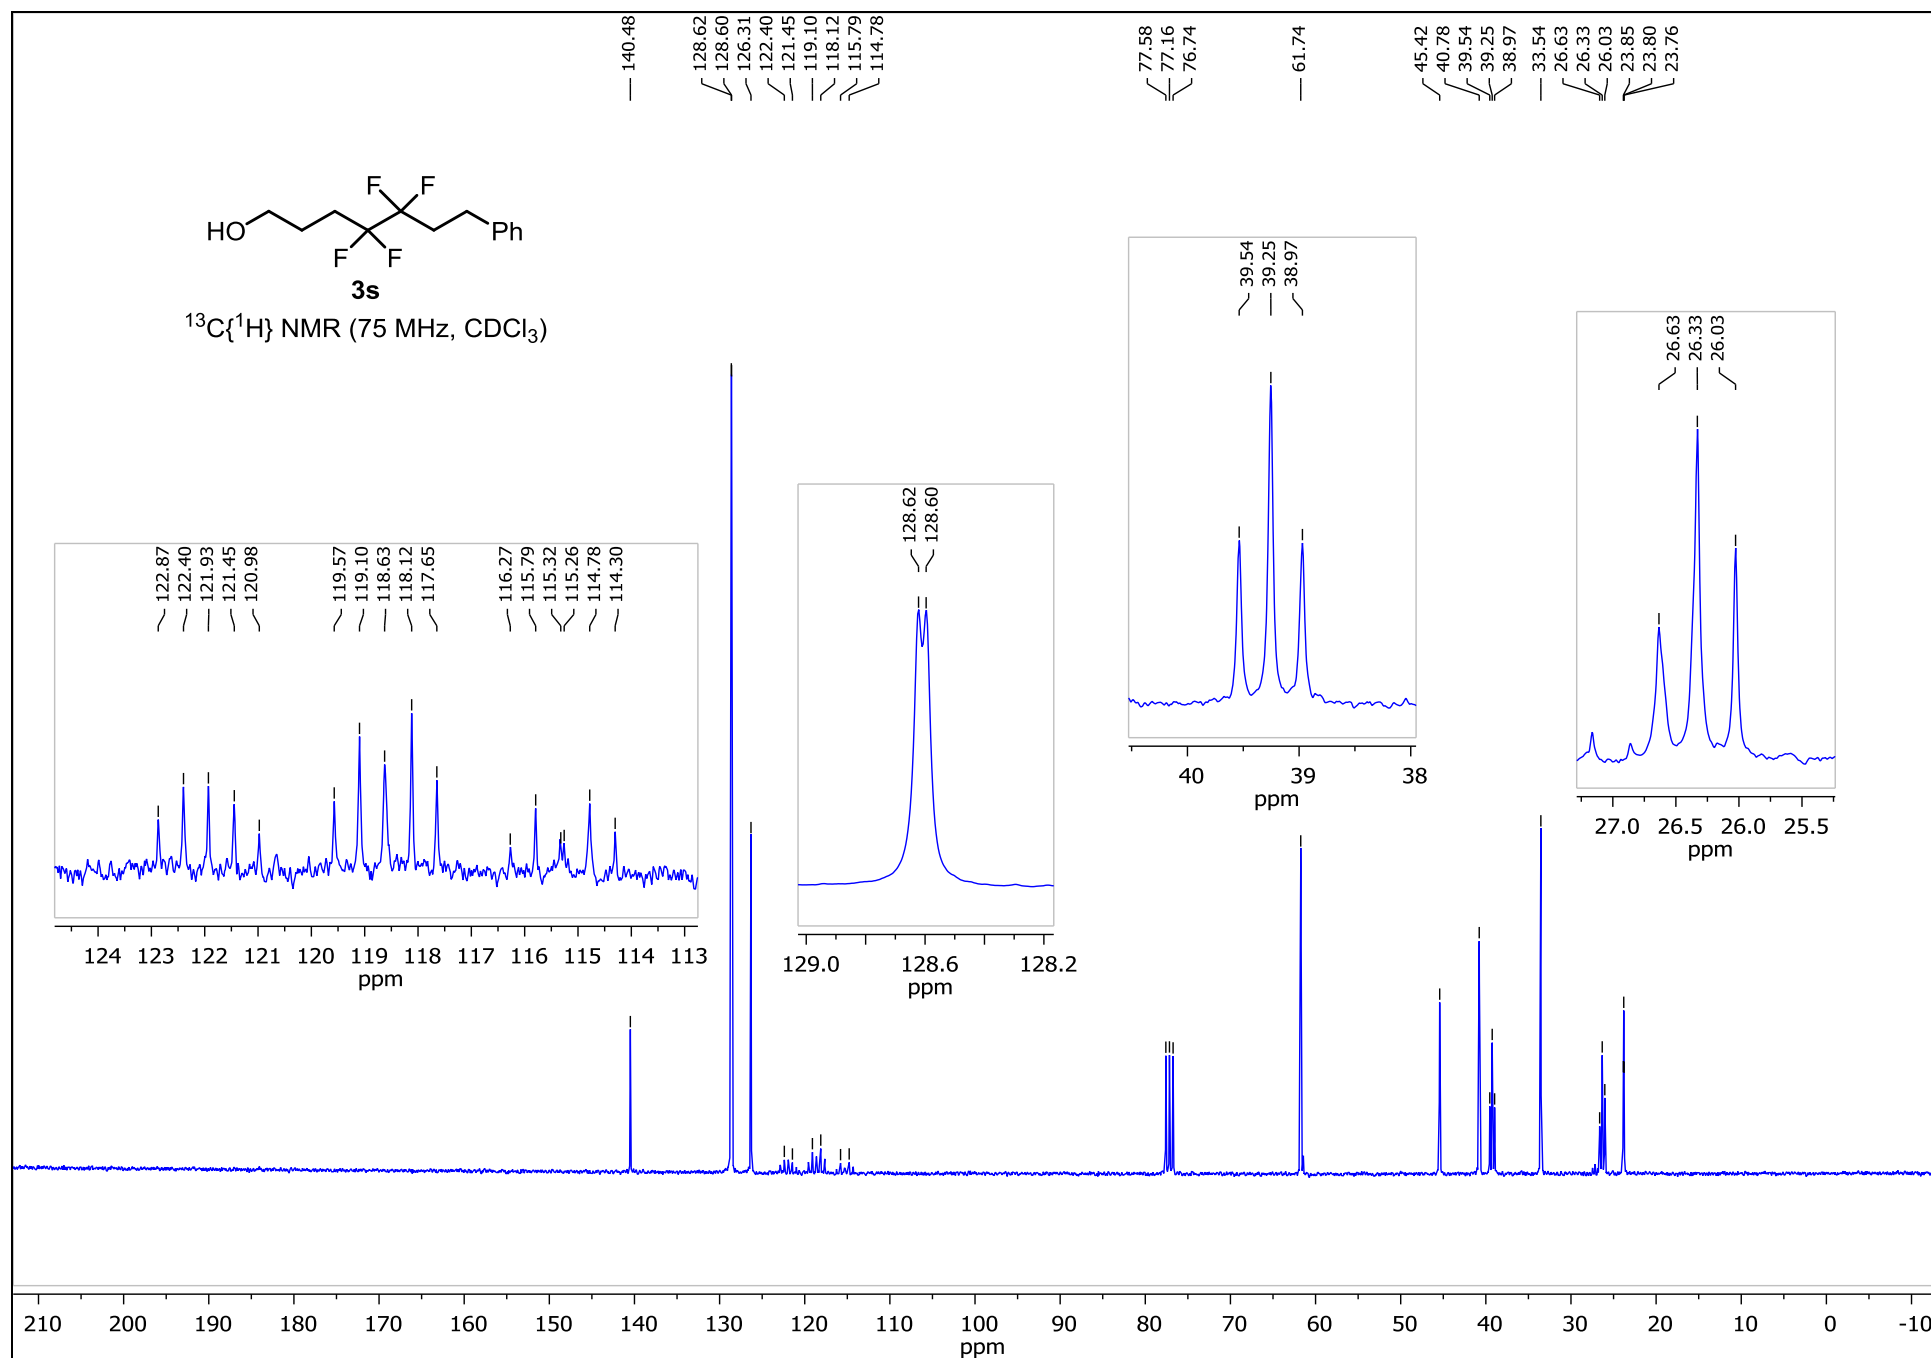



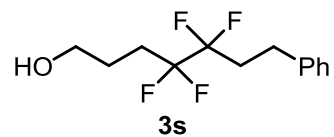

$^{19}\text{F}$  NMR (282 MHz,  $\text{CDCl}_3$ )

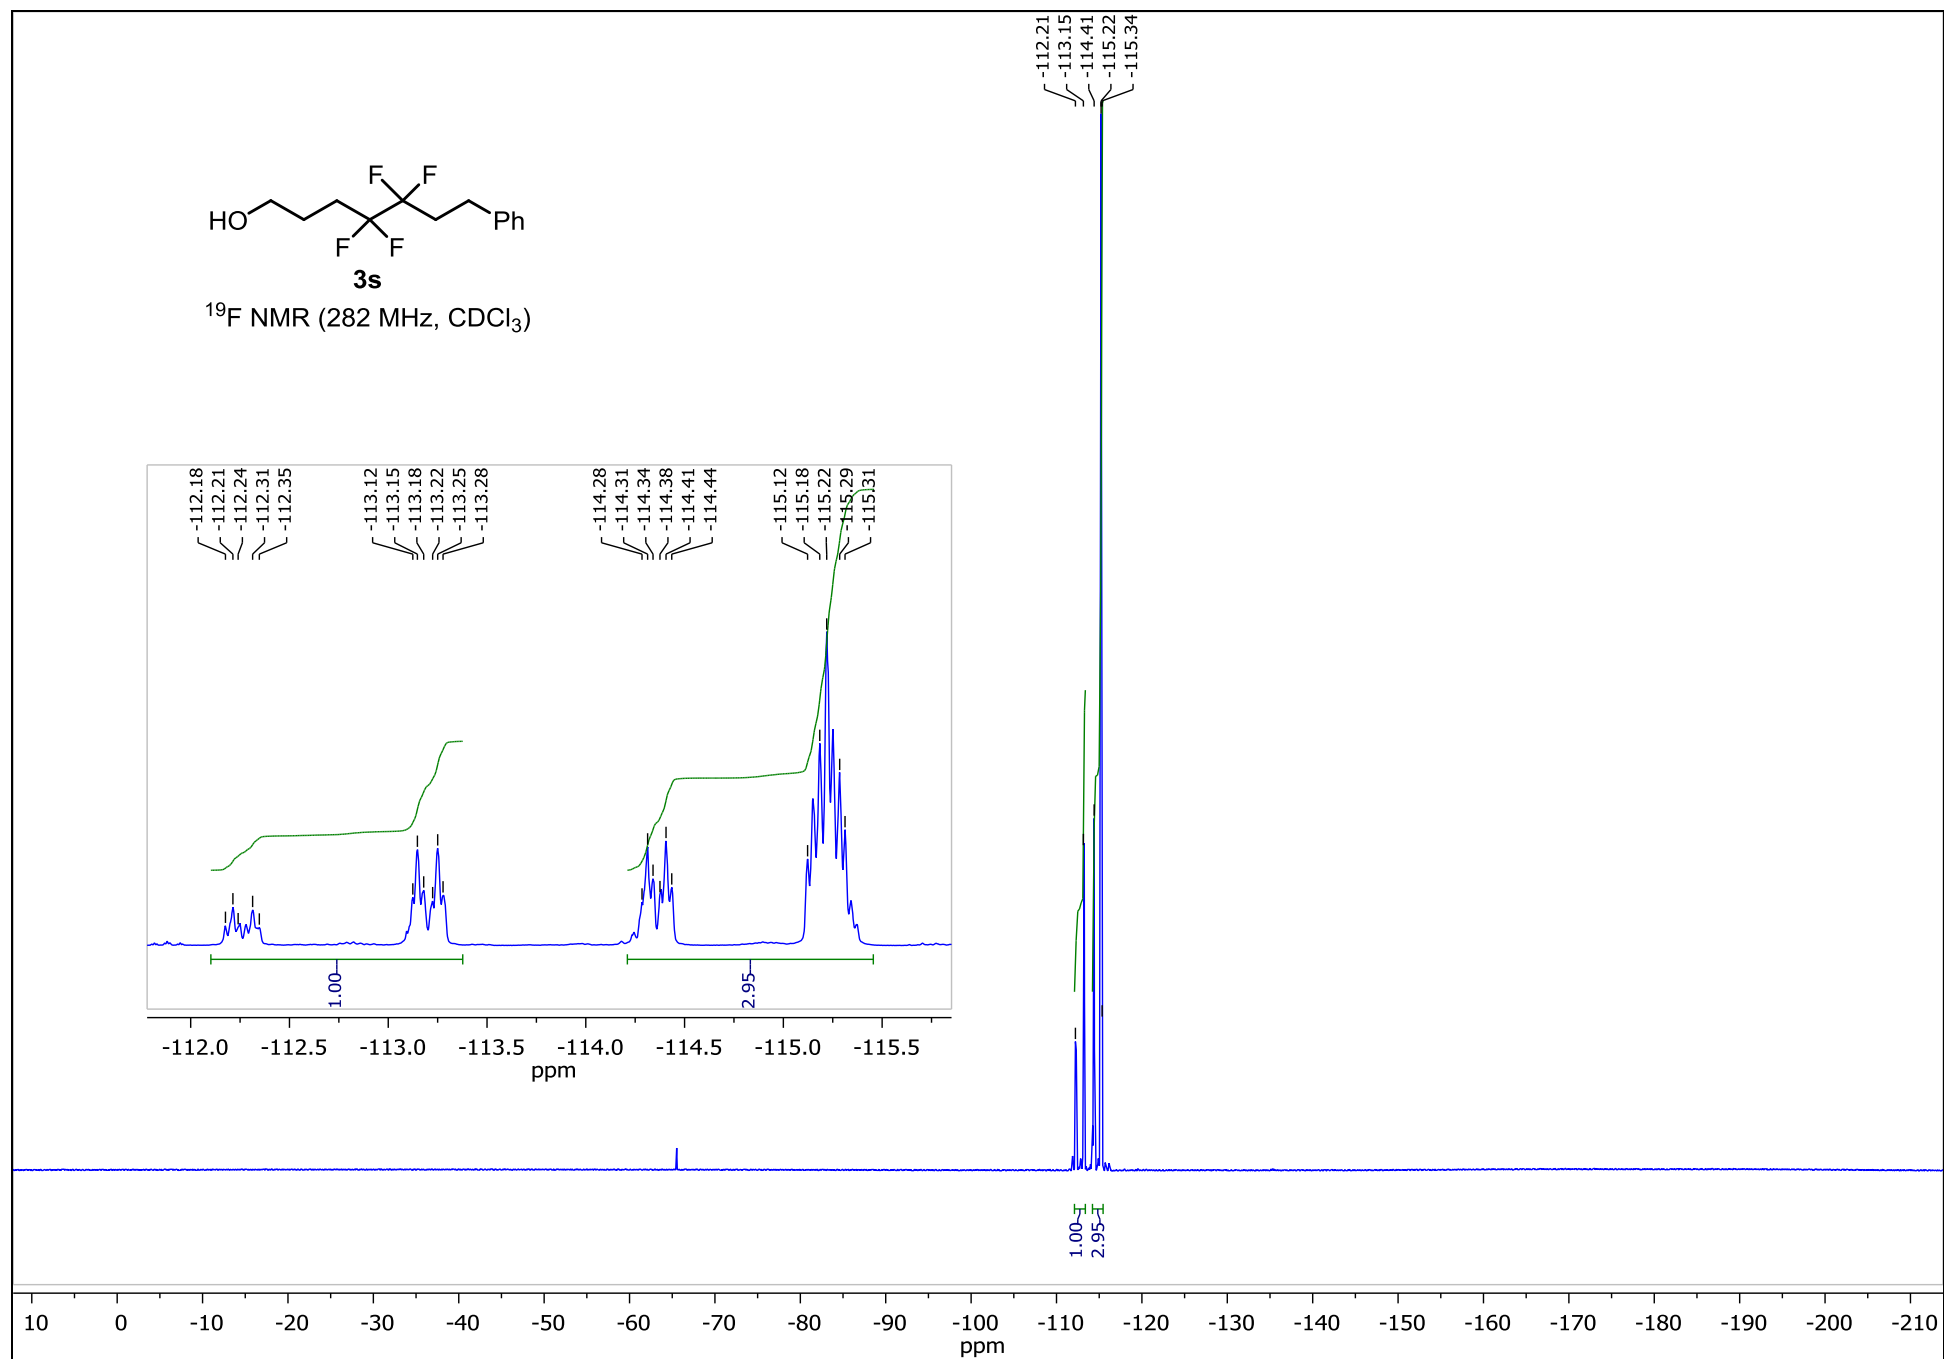

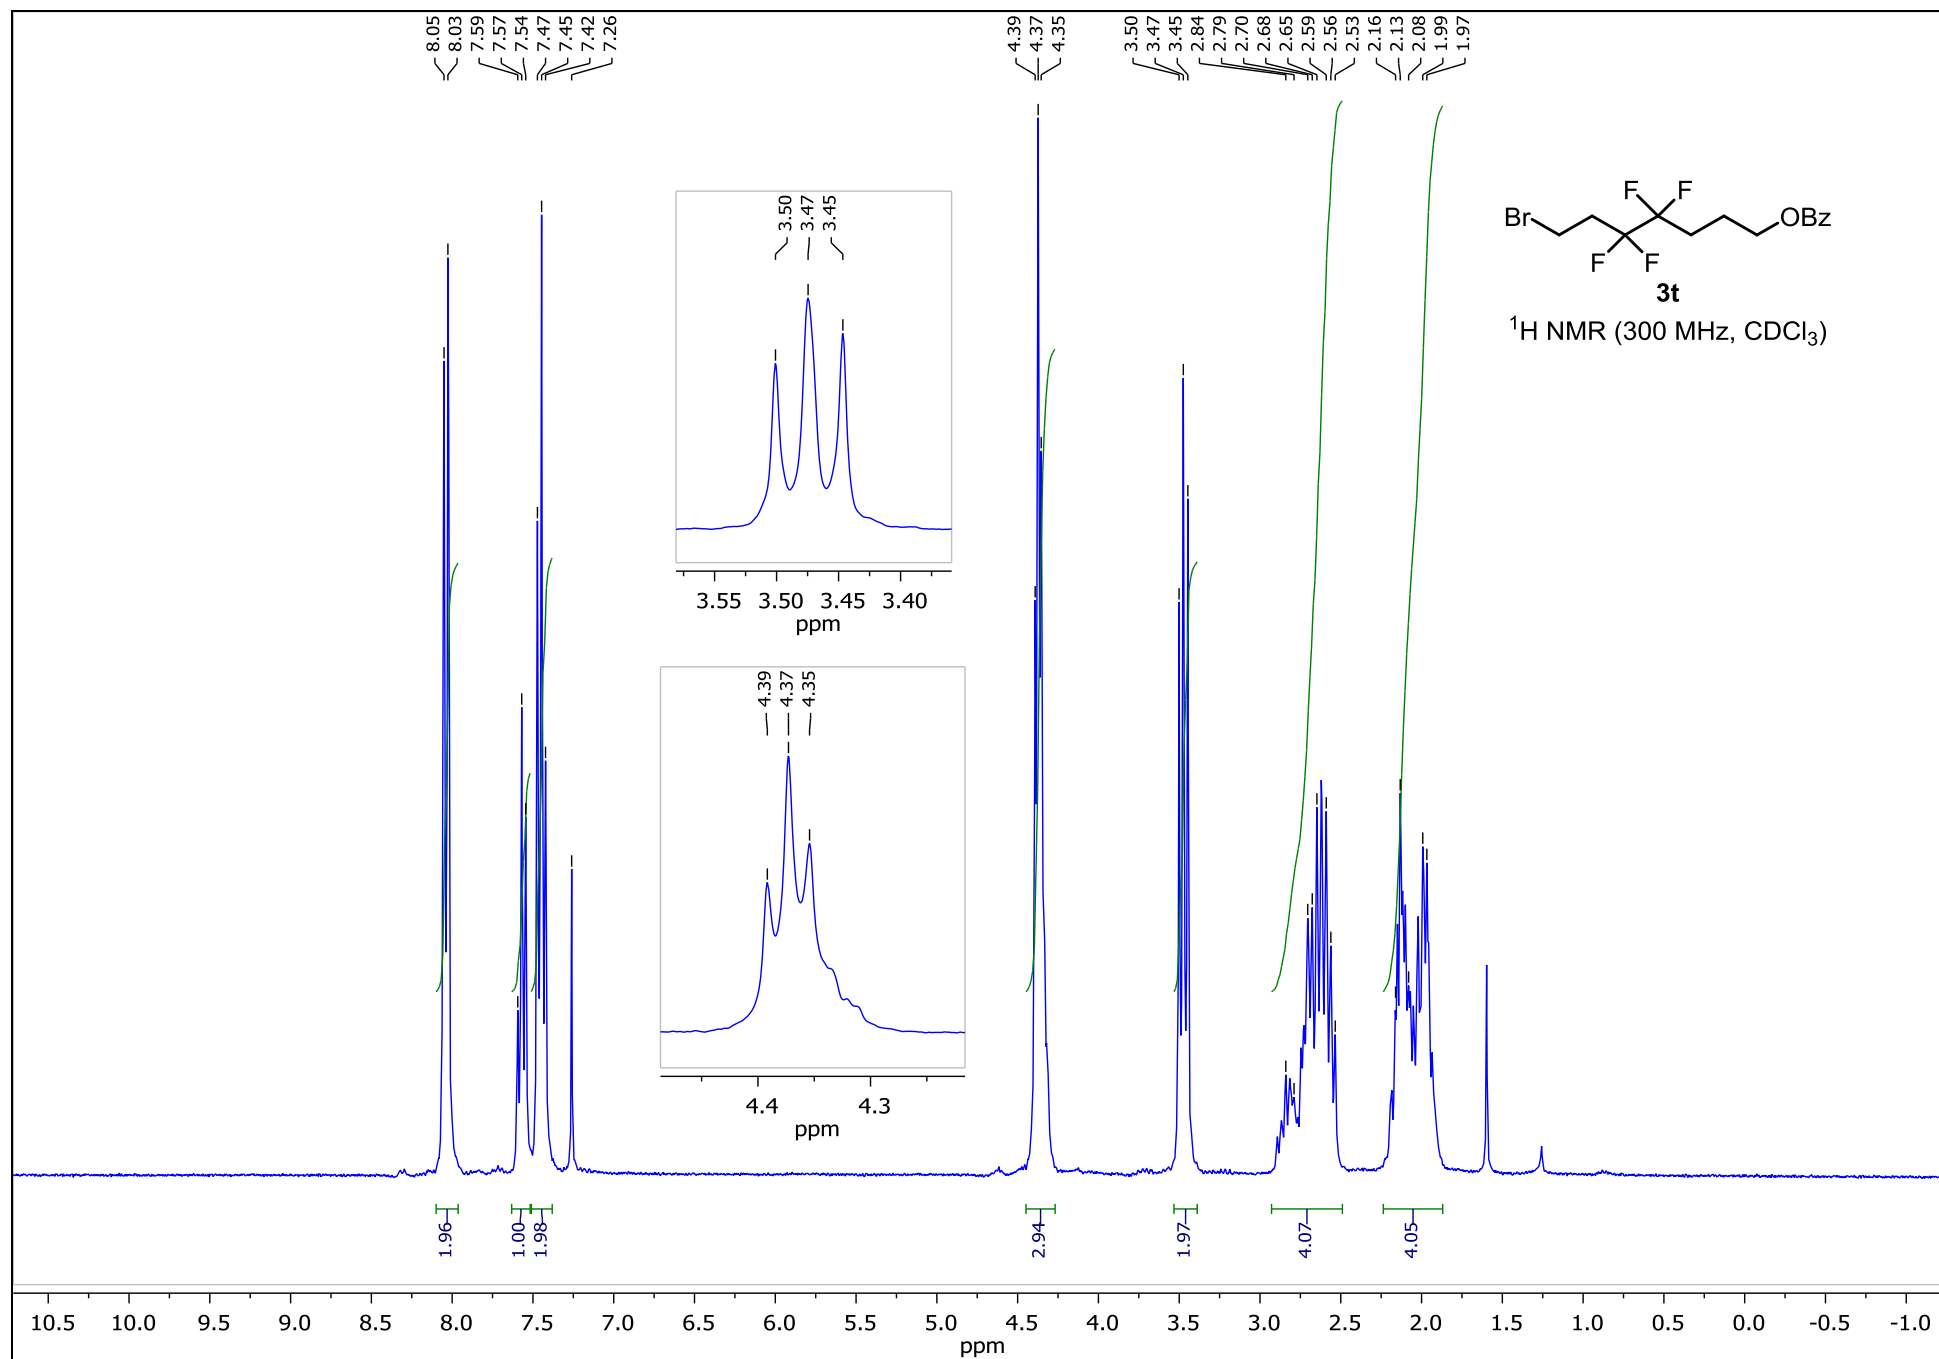

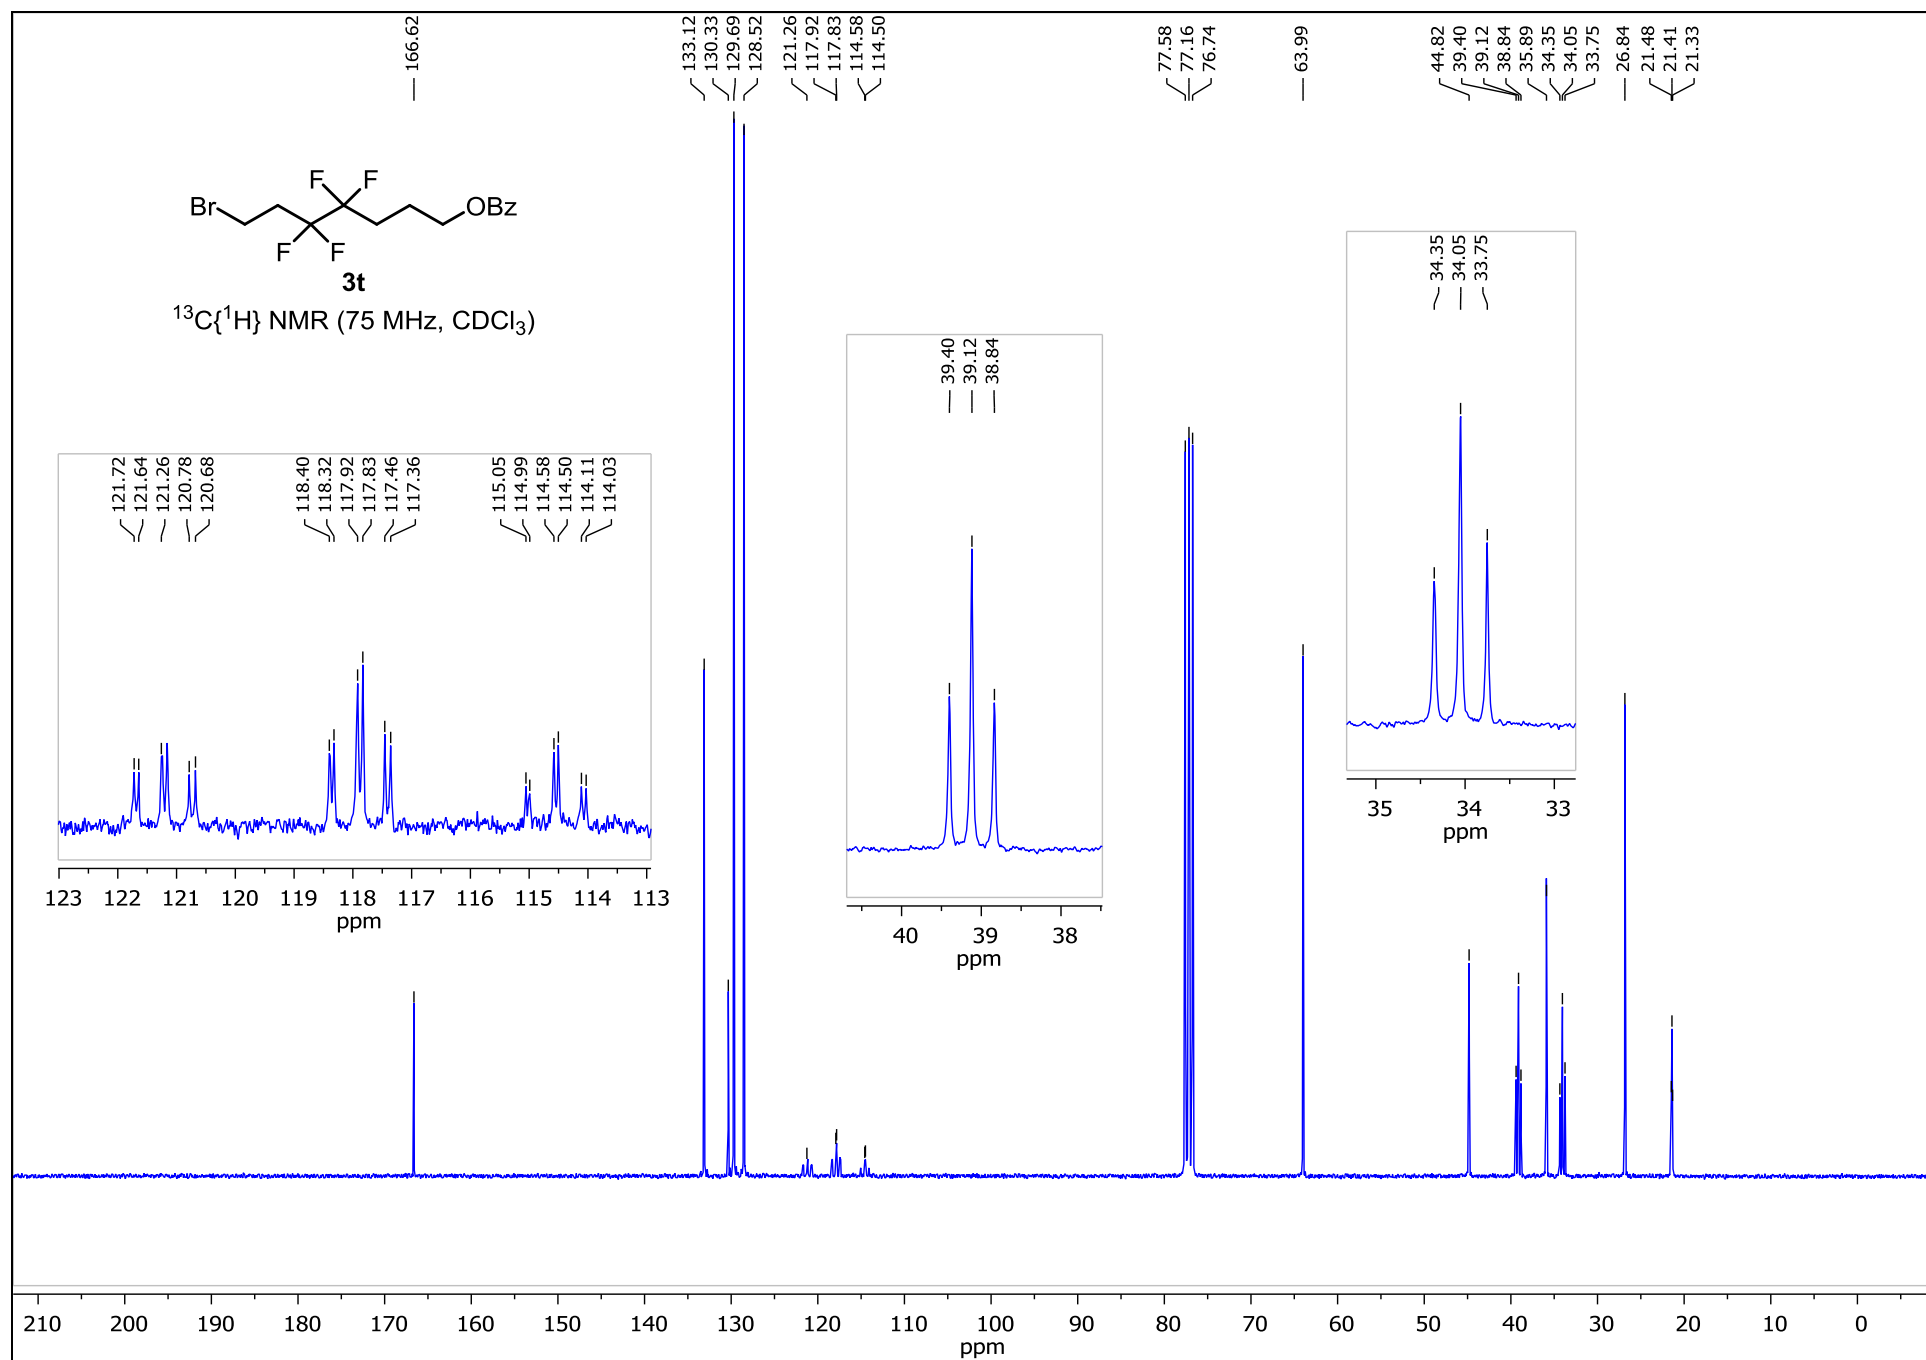

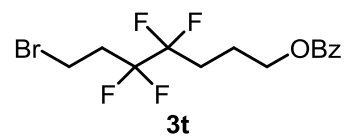

$^{19}\text{F}$  NMR (282 MHz,  $\text{CDCl}_3$ )

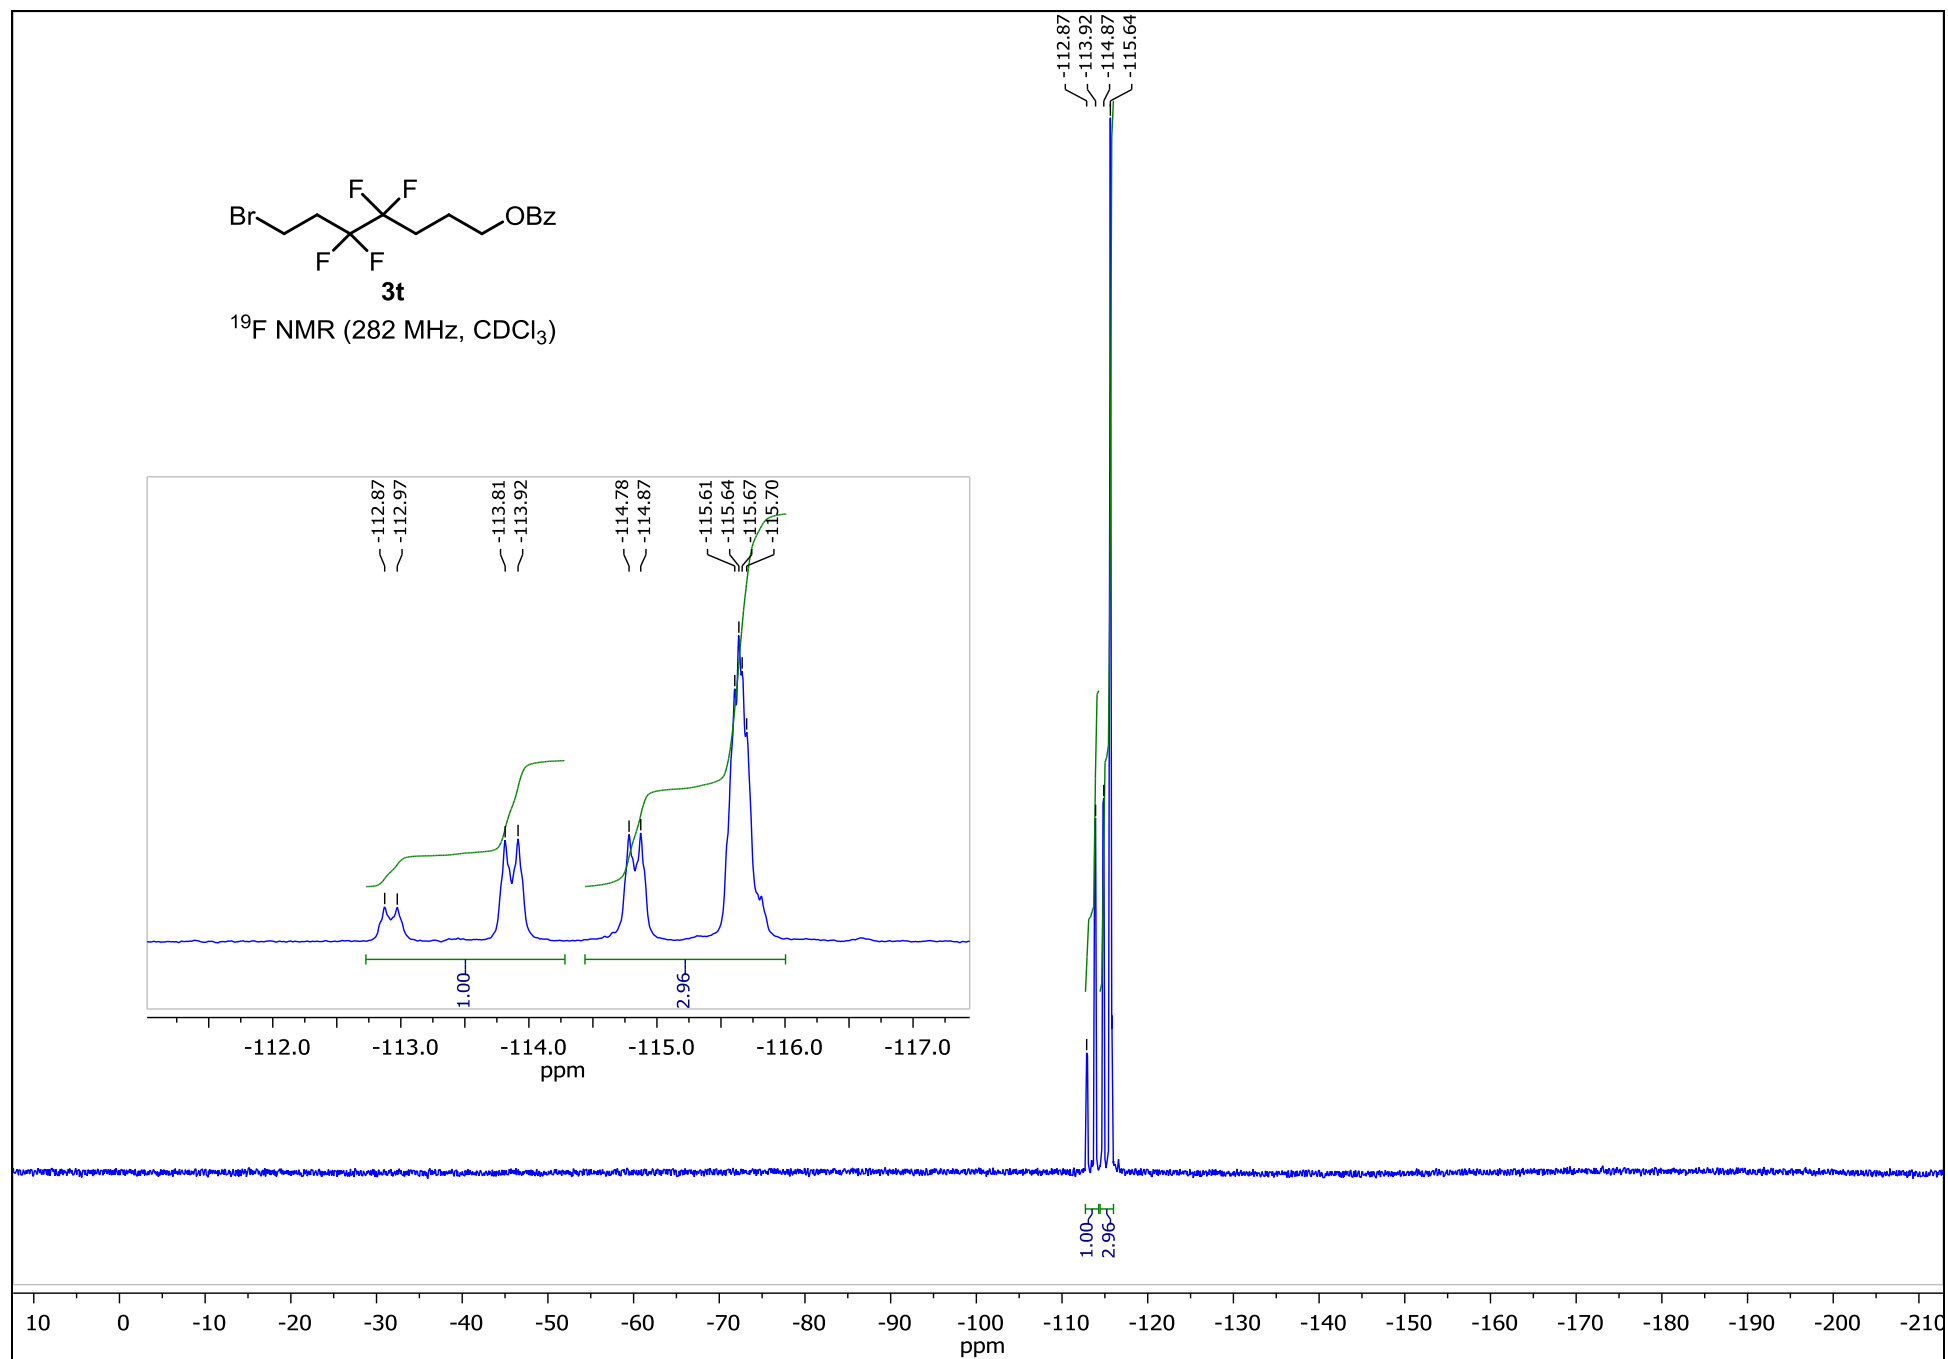

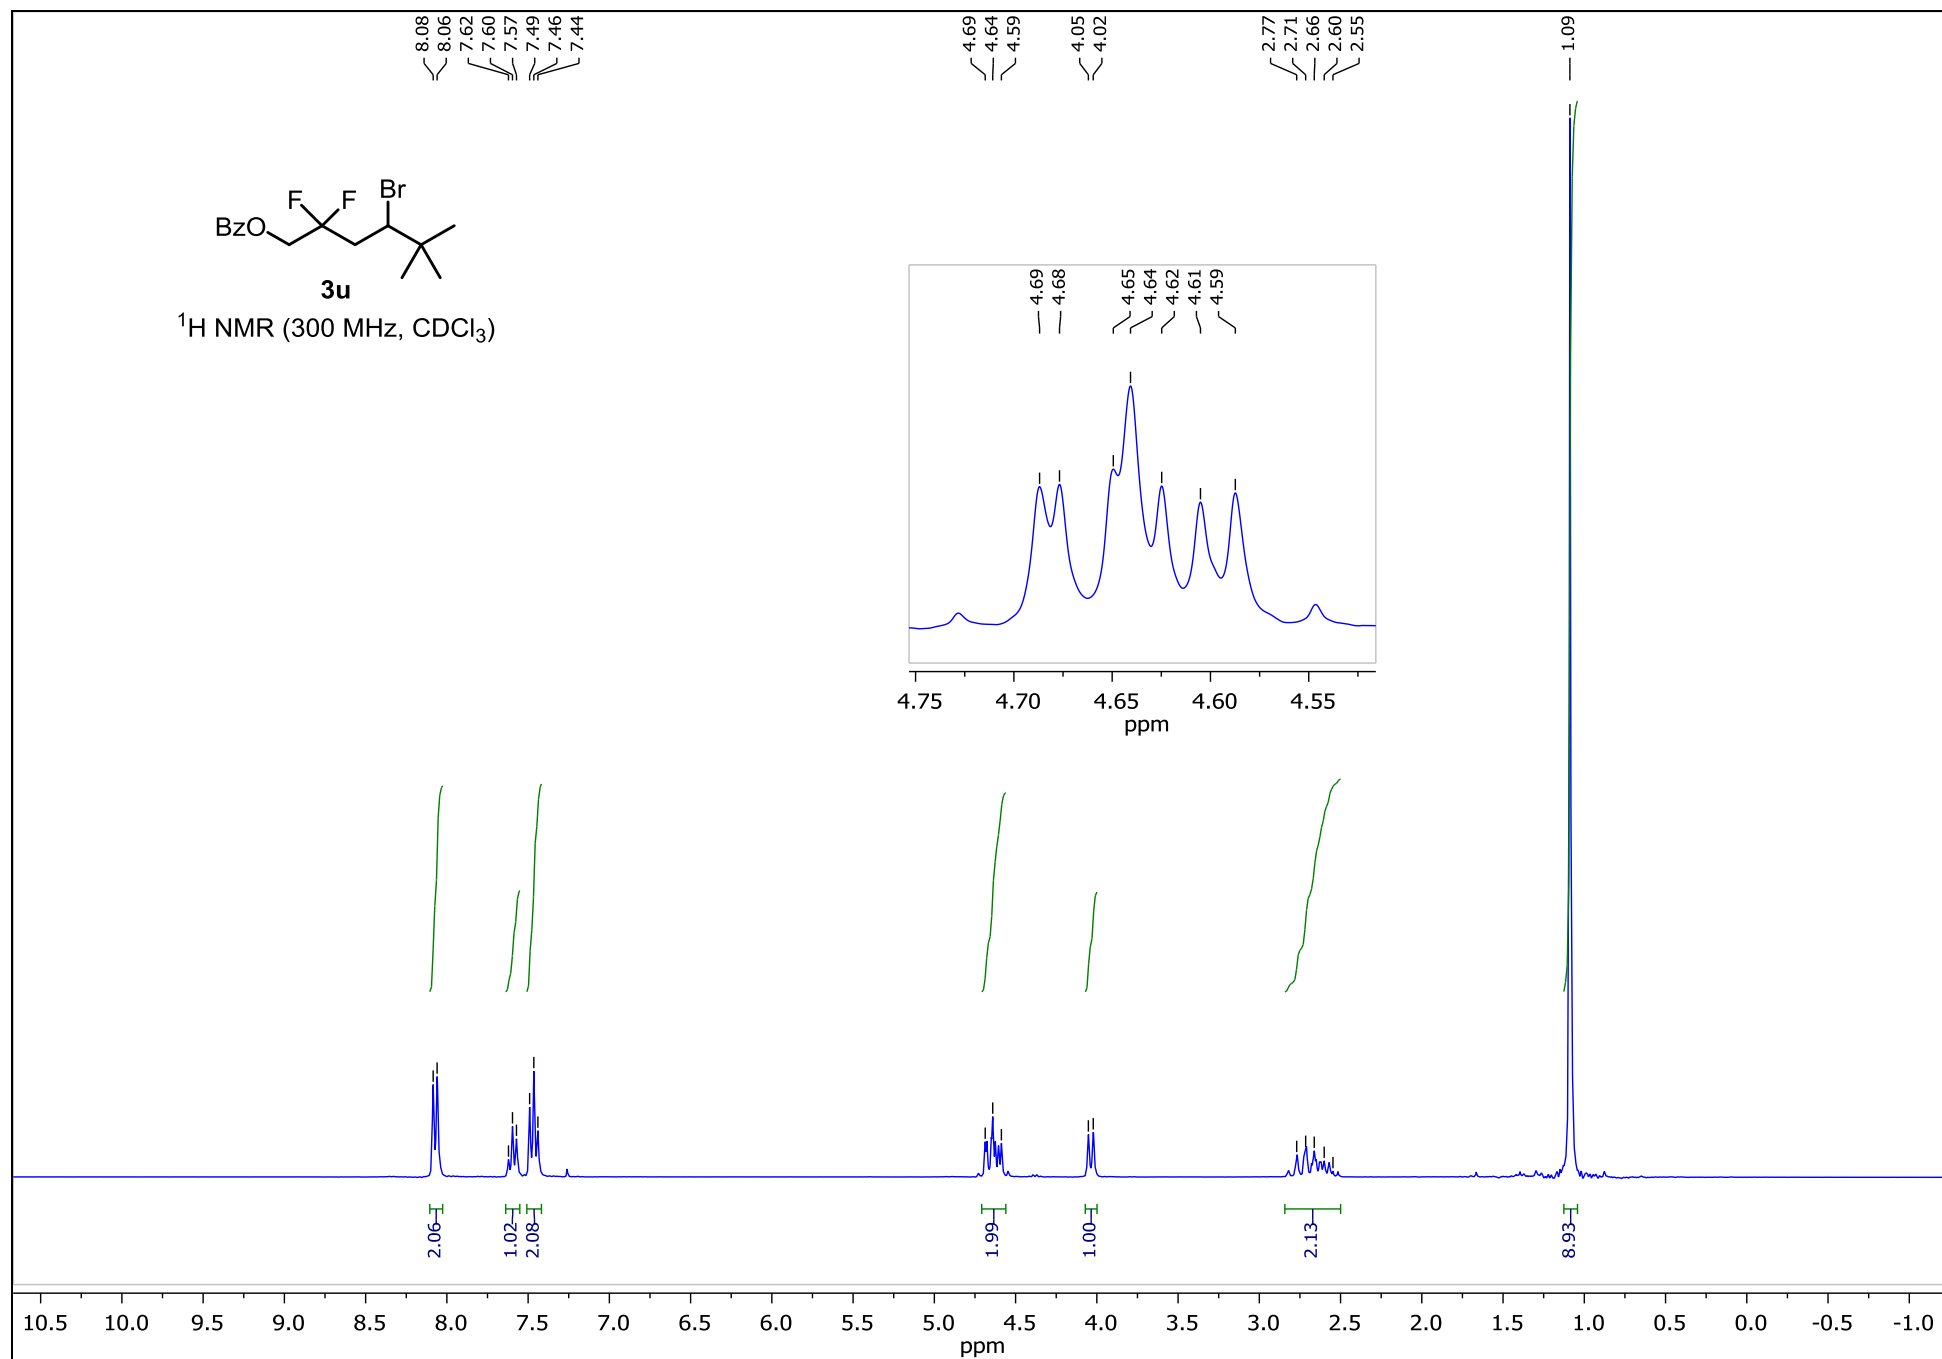

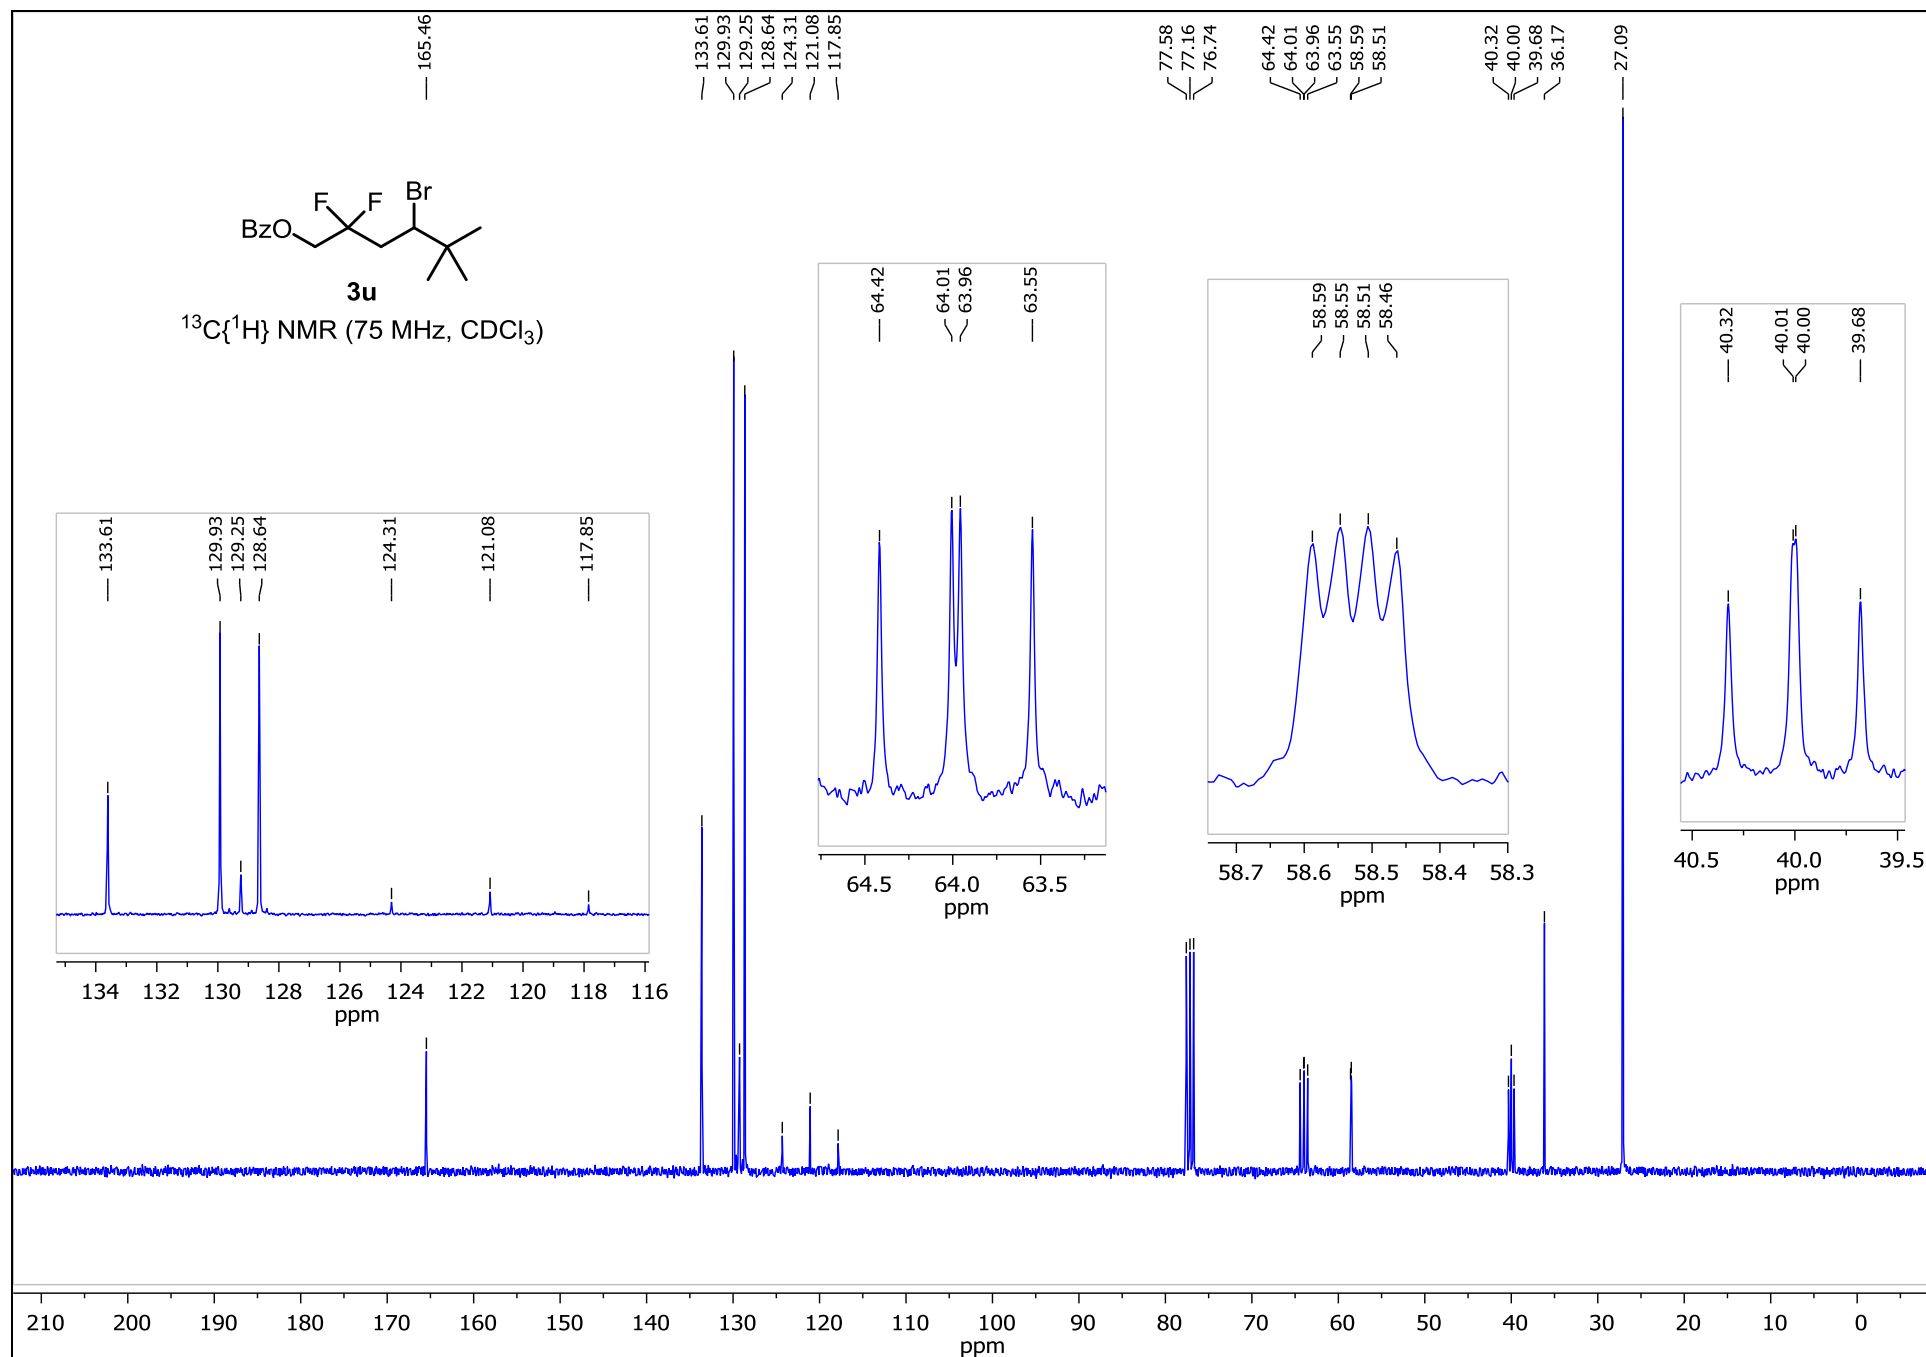

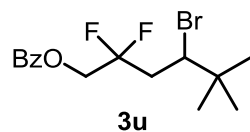

$^{19}\text{F}$  NMR (282 MHz,  $\text{CDCl}_3$ )

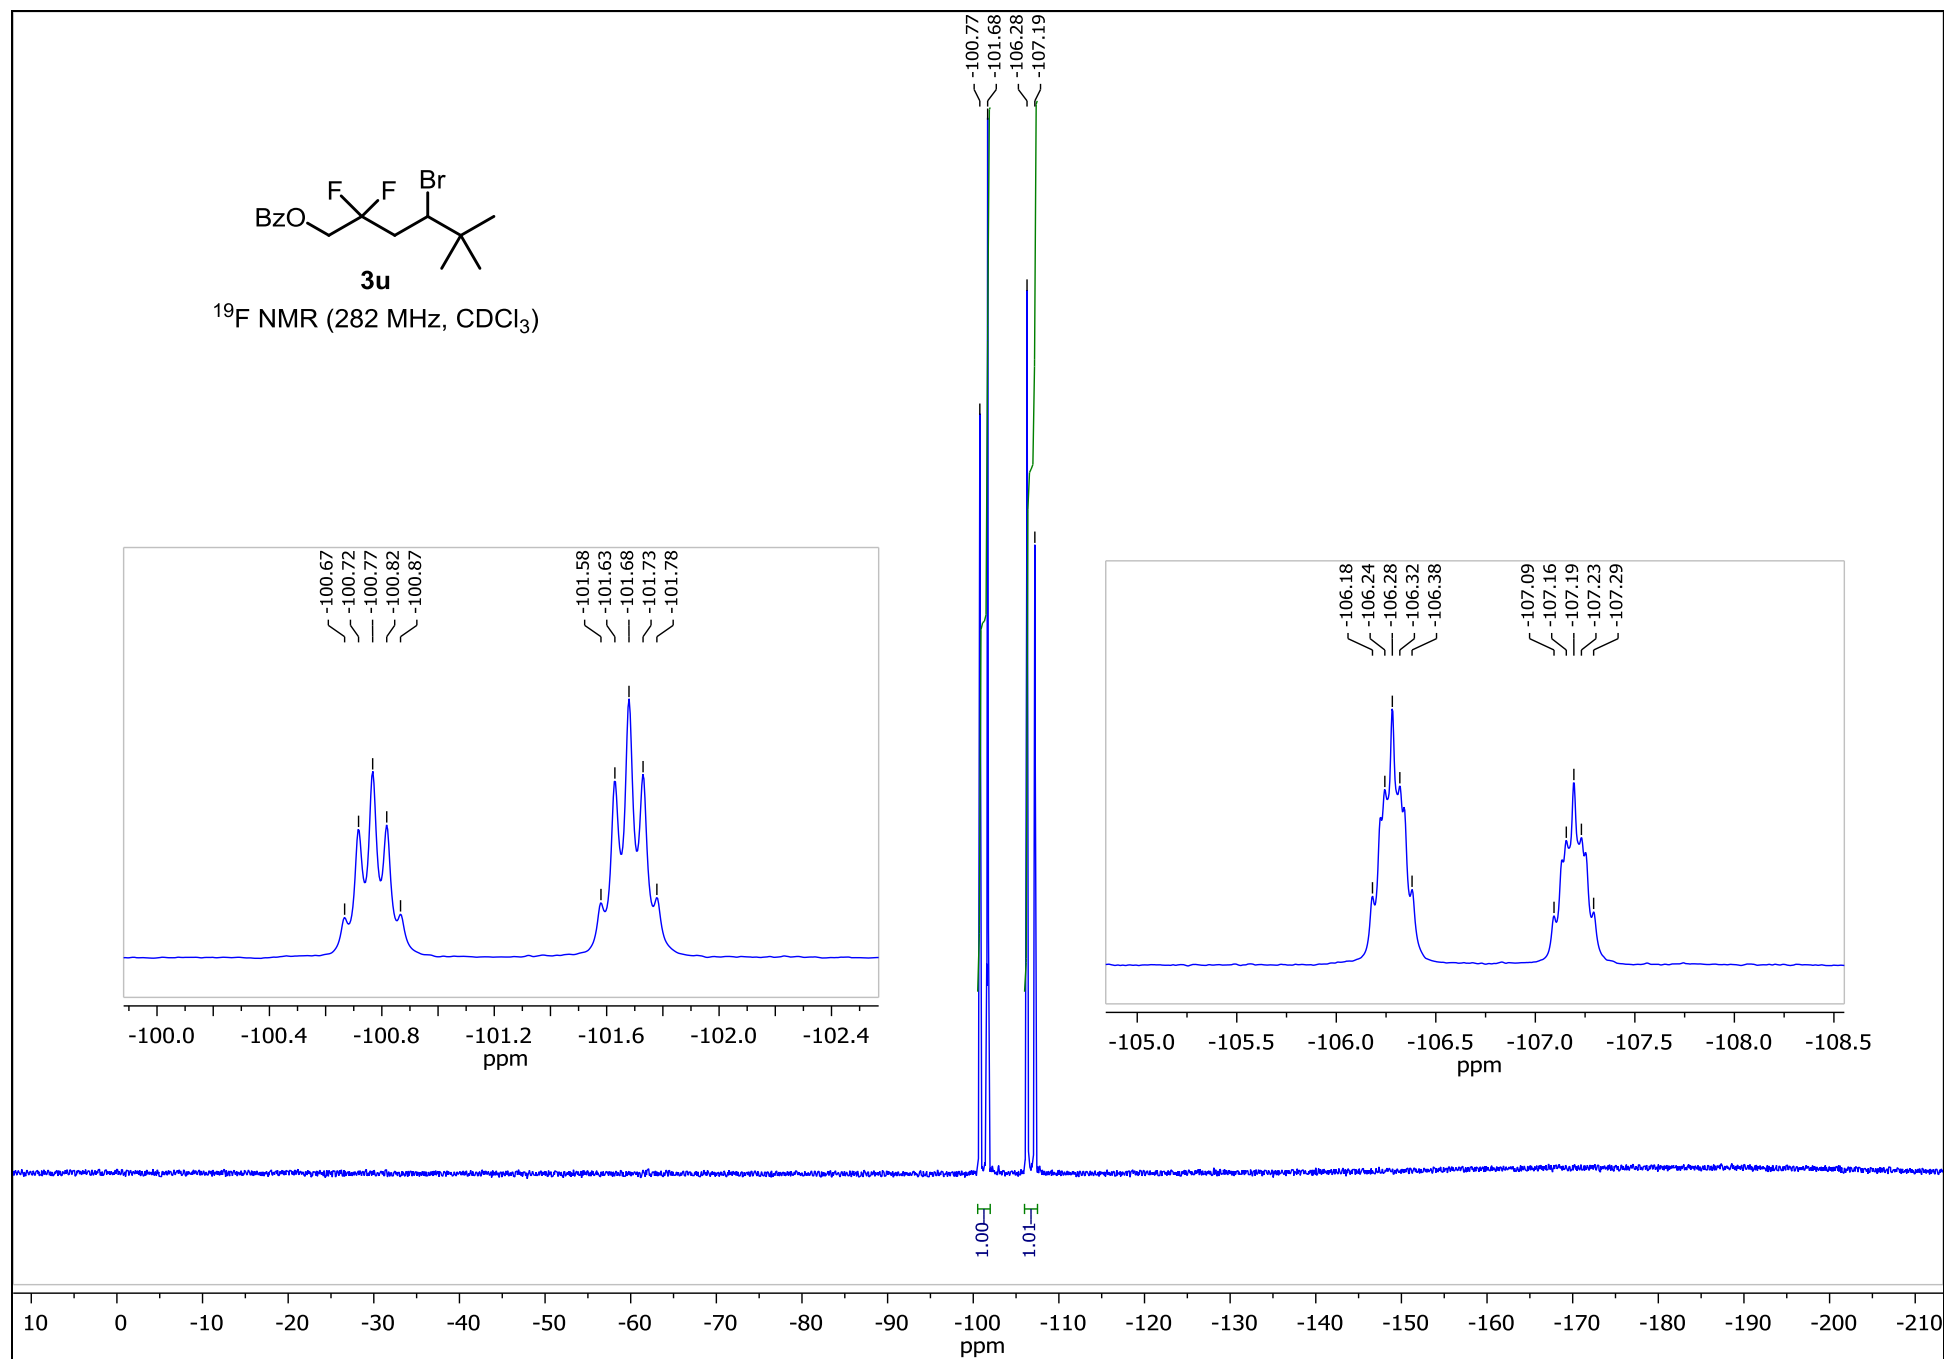

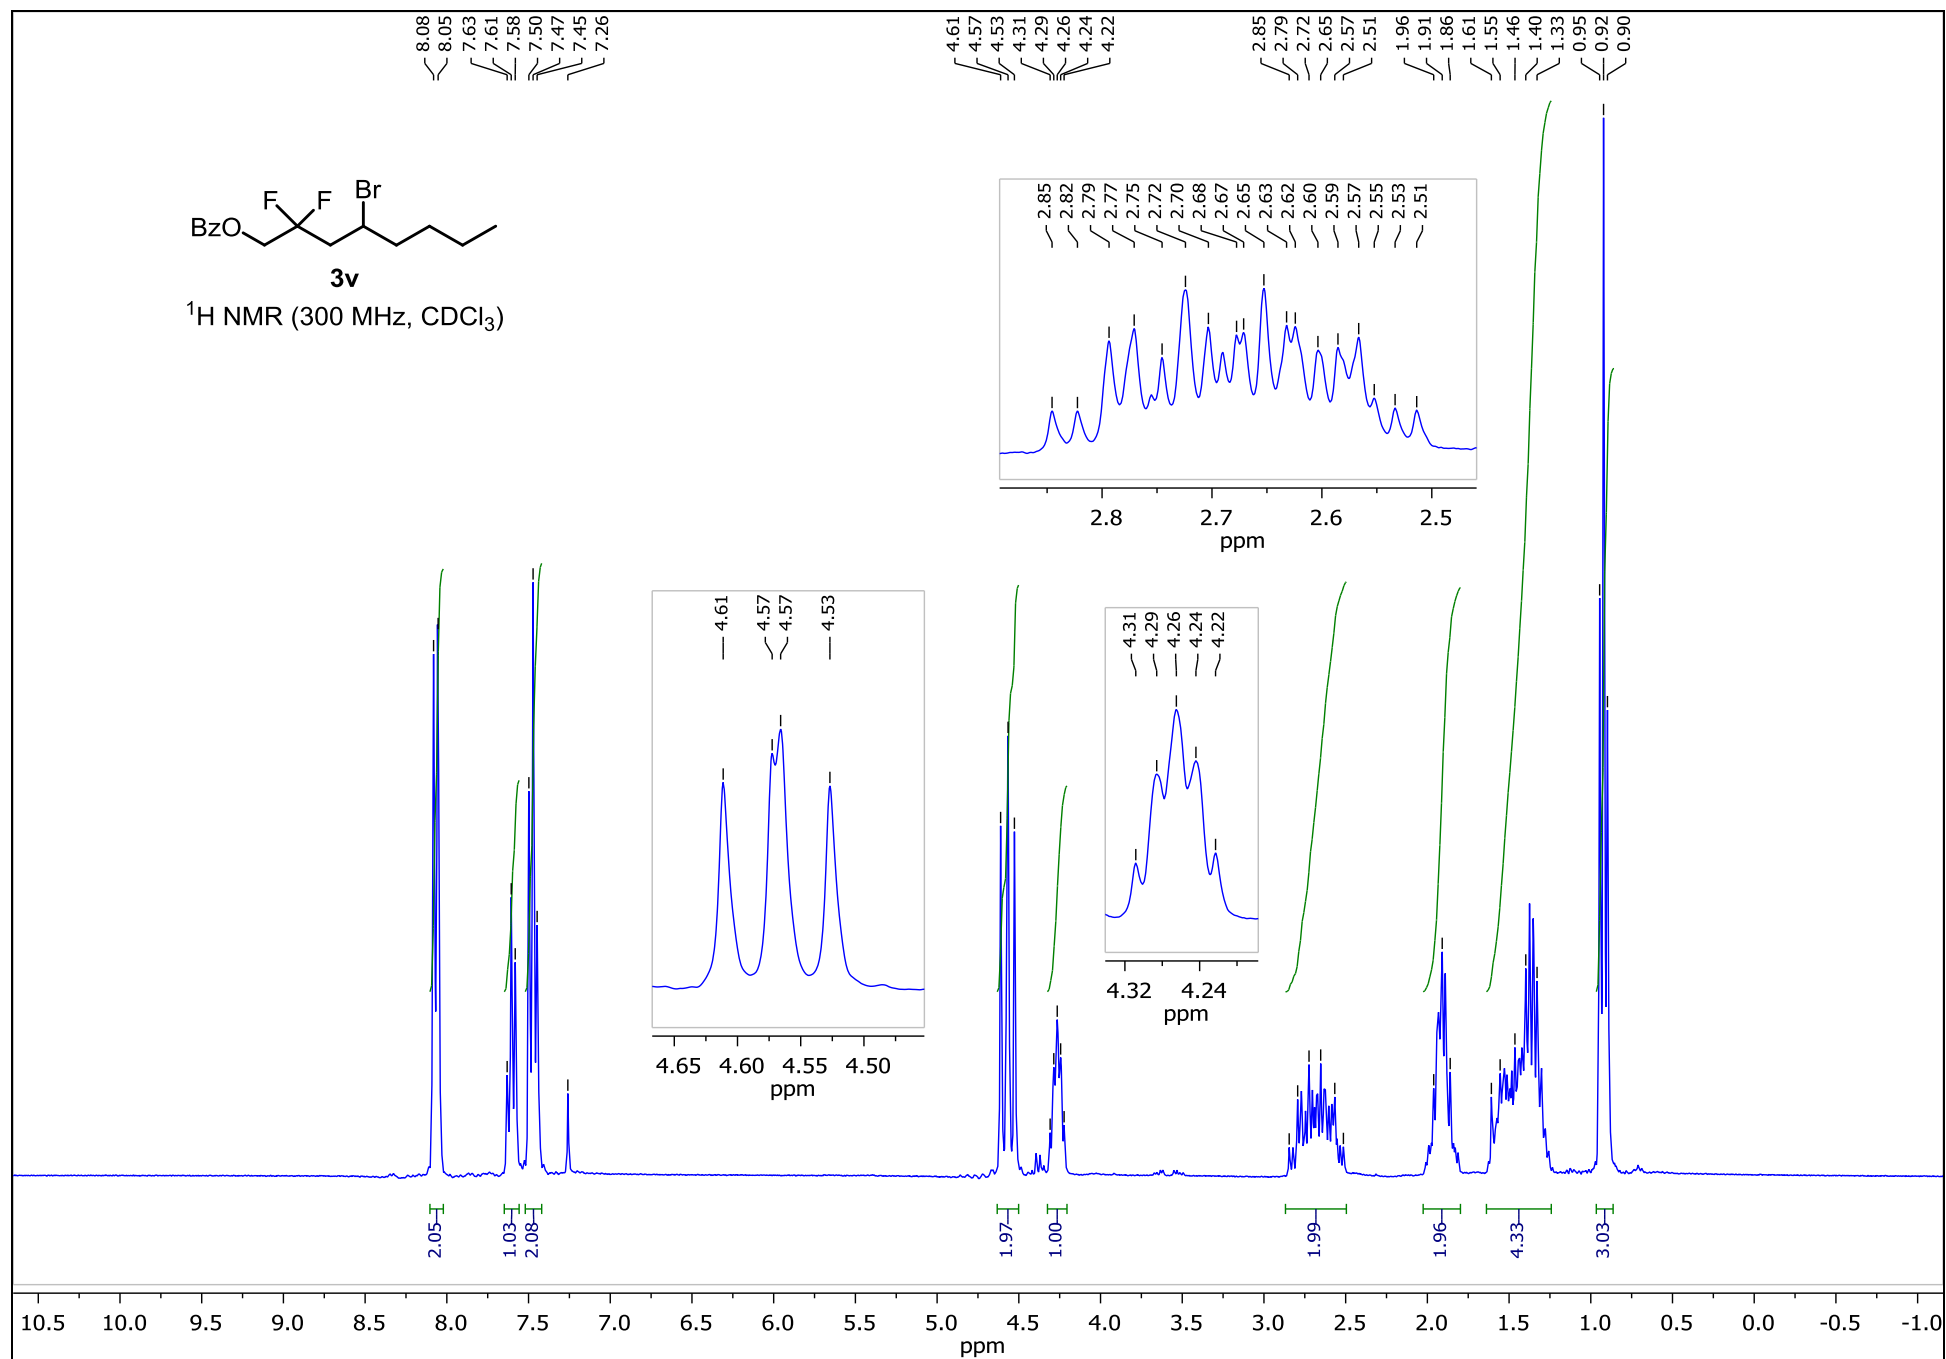



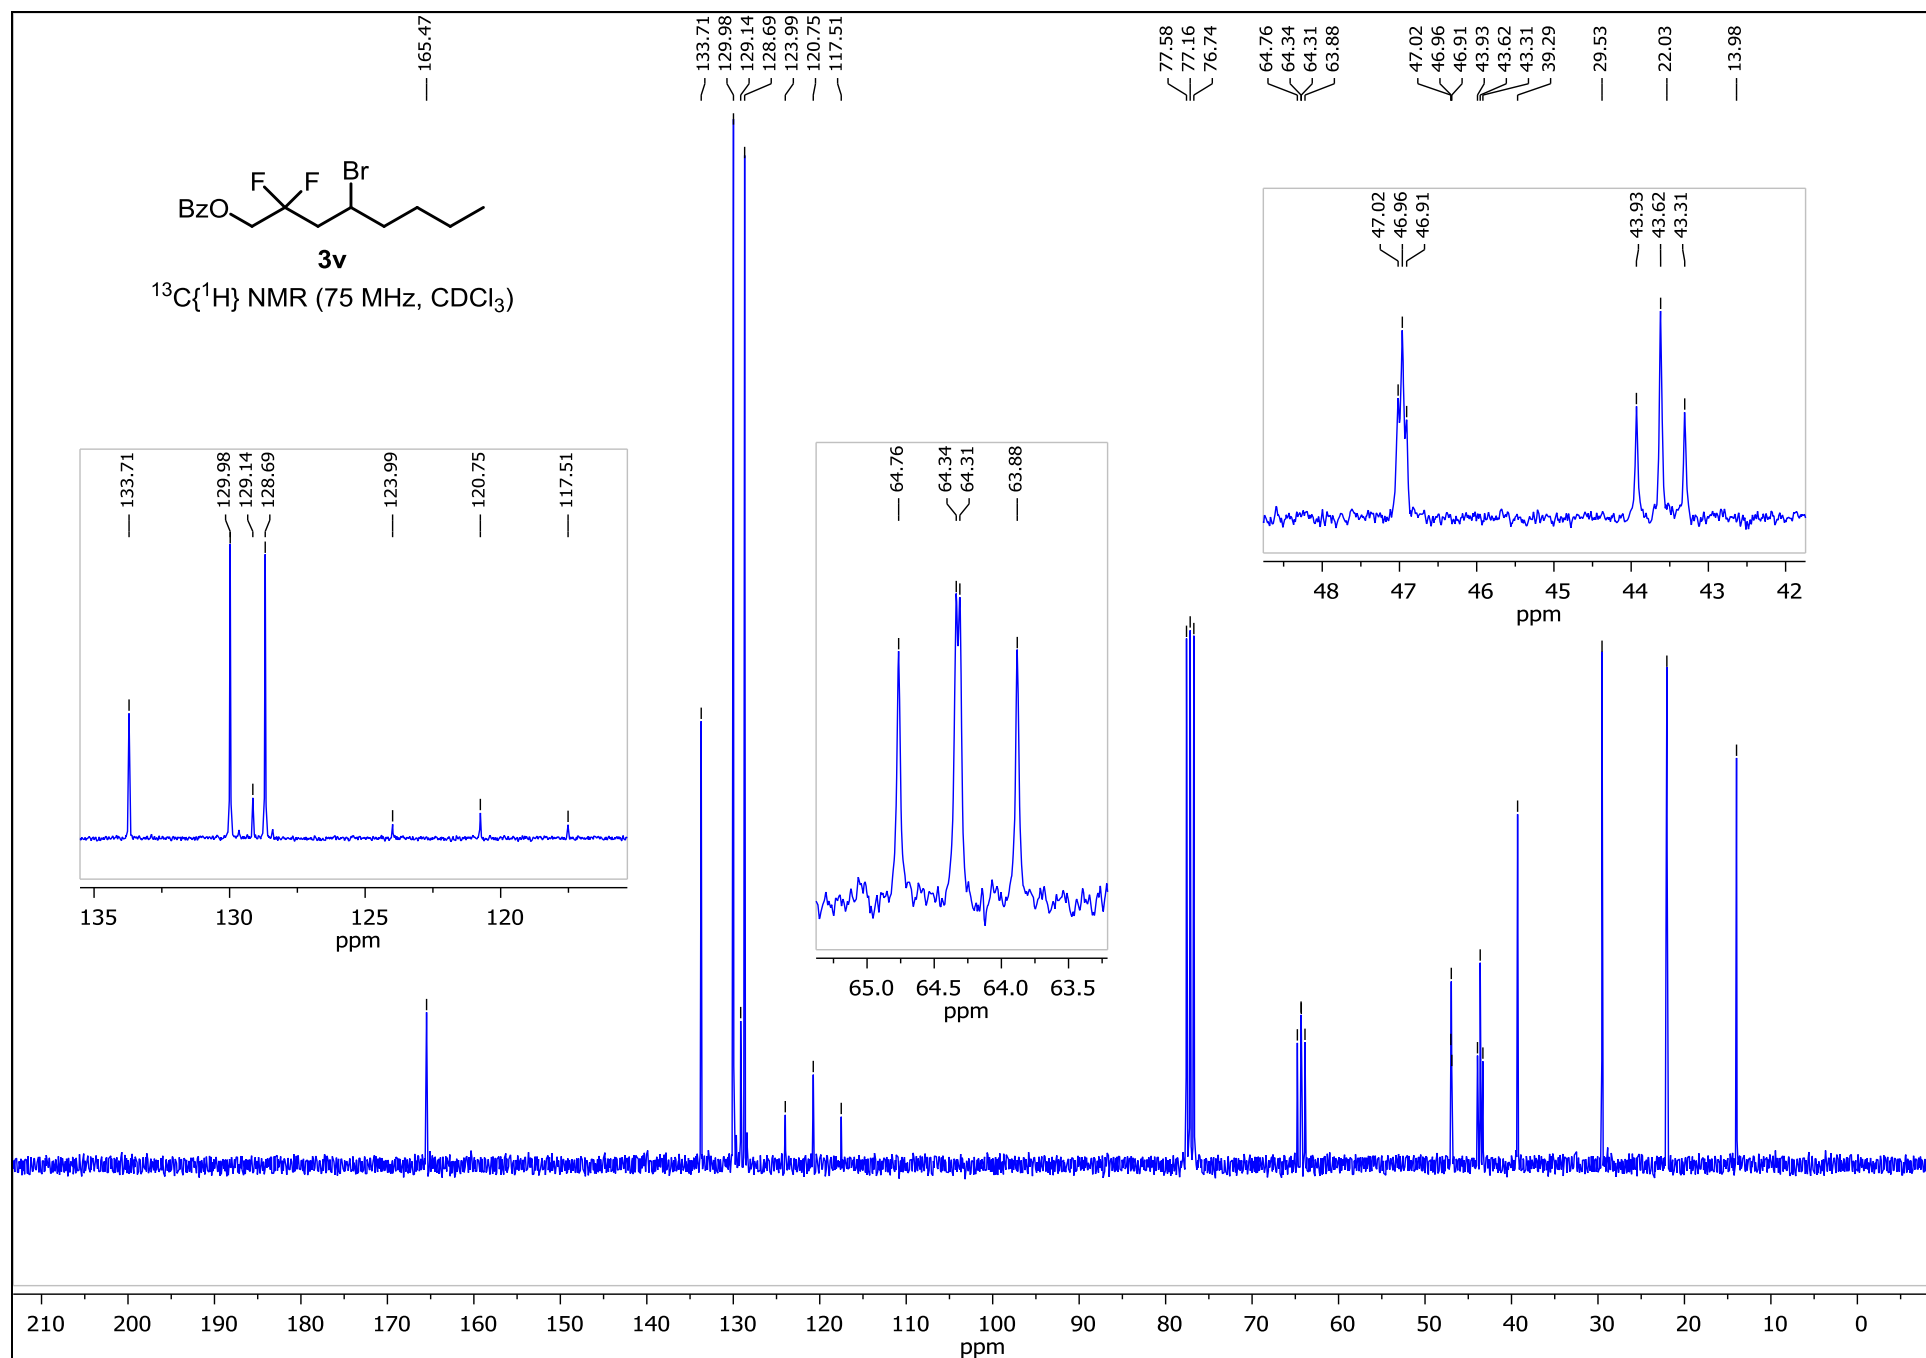

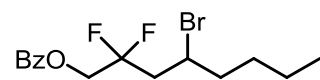**3v** $^{19}\text{F}$  NMR (282 MHz,  $\text{CDCl}_3$ )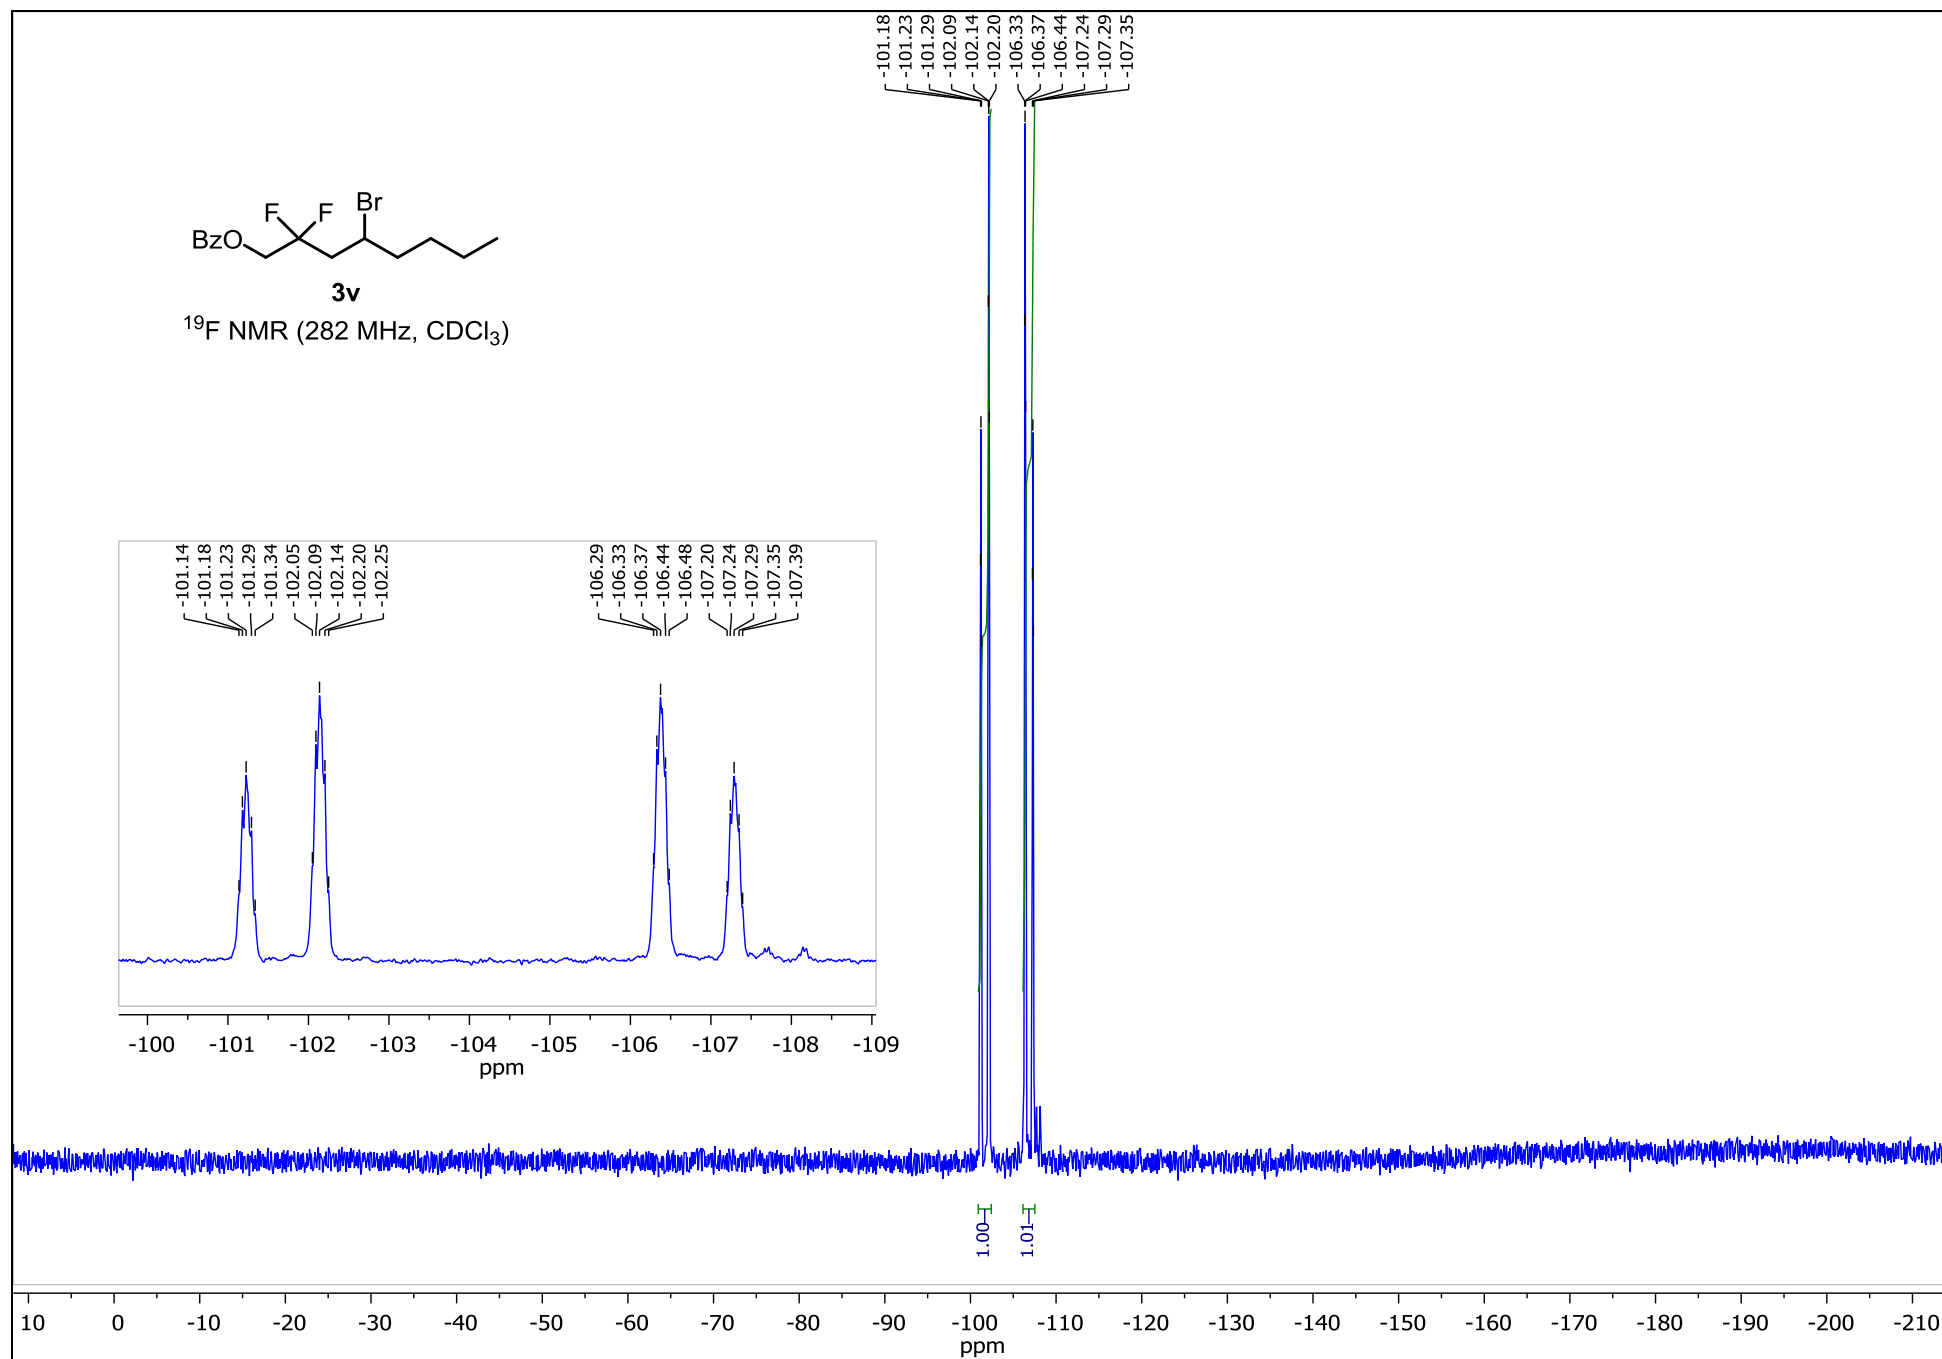

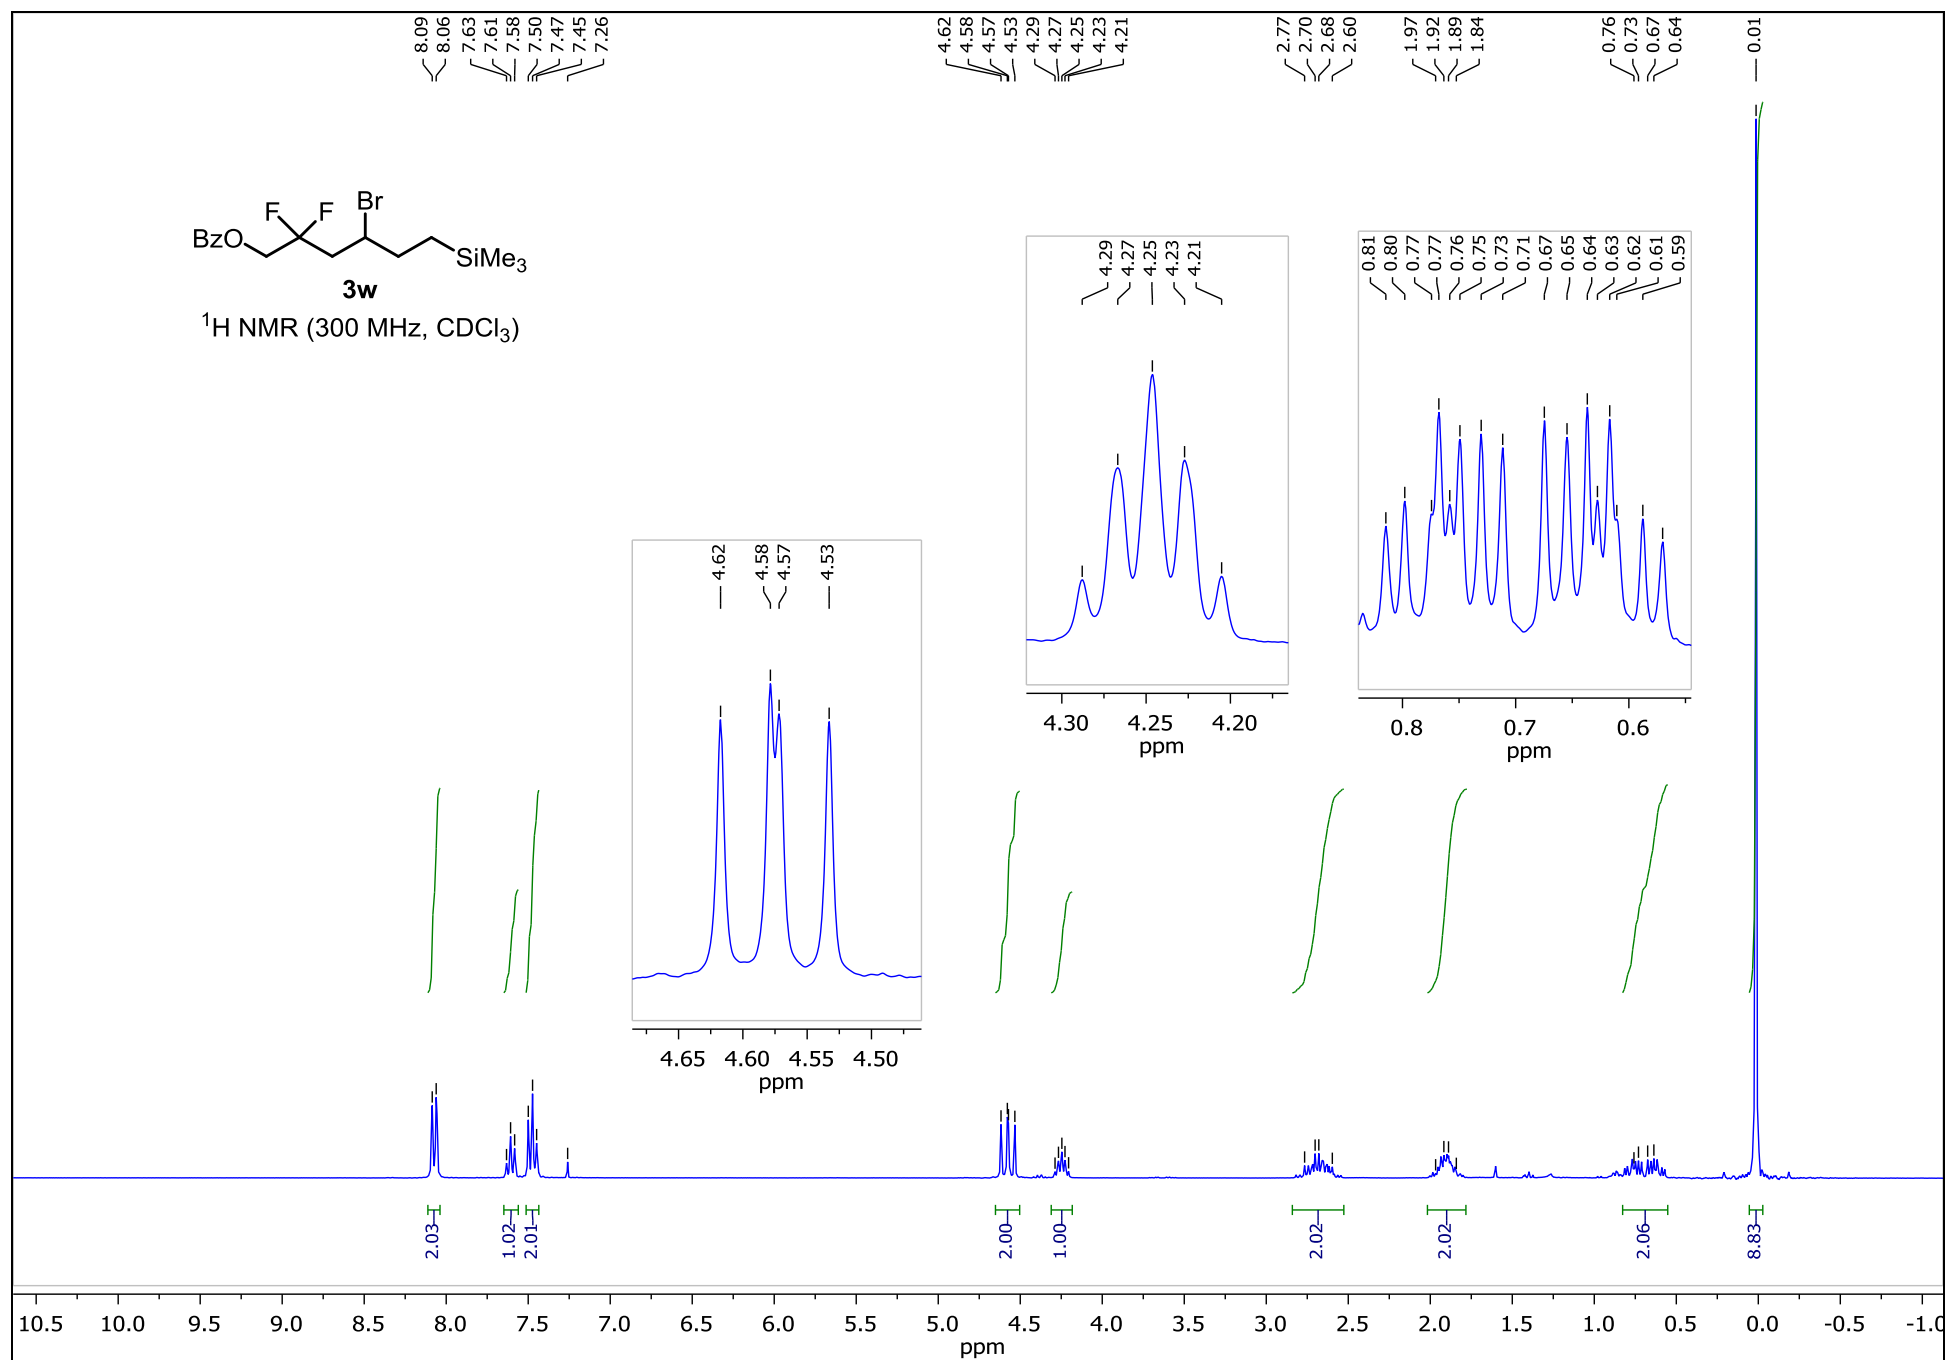

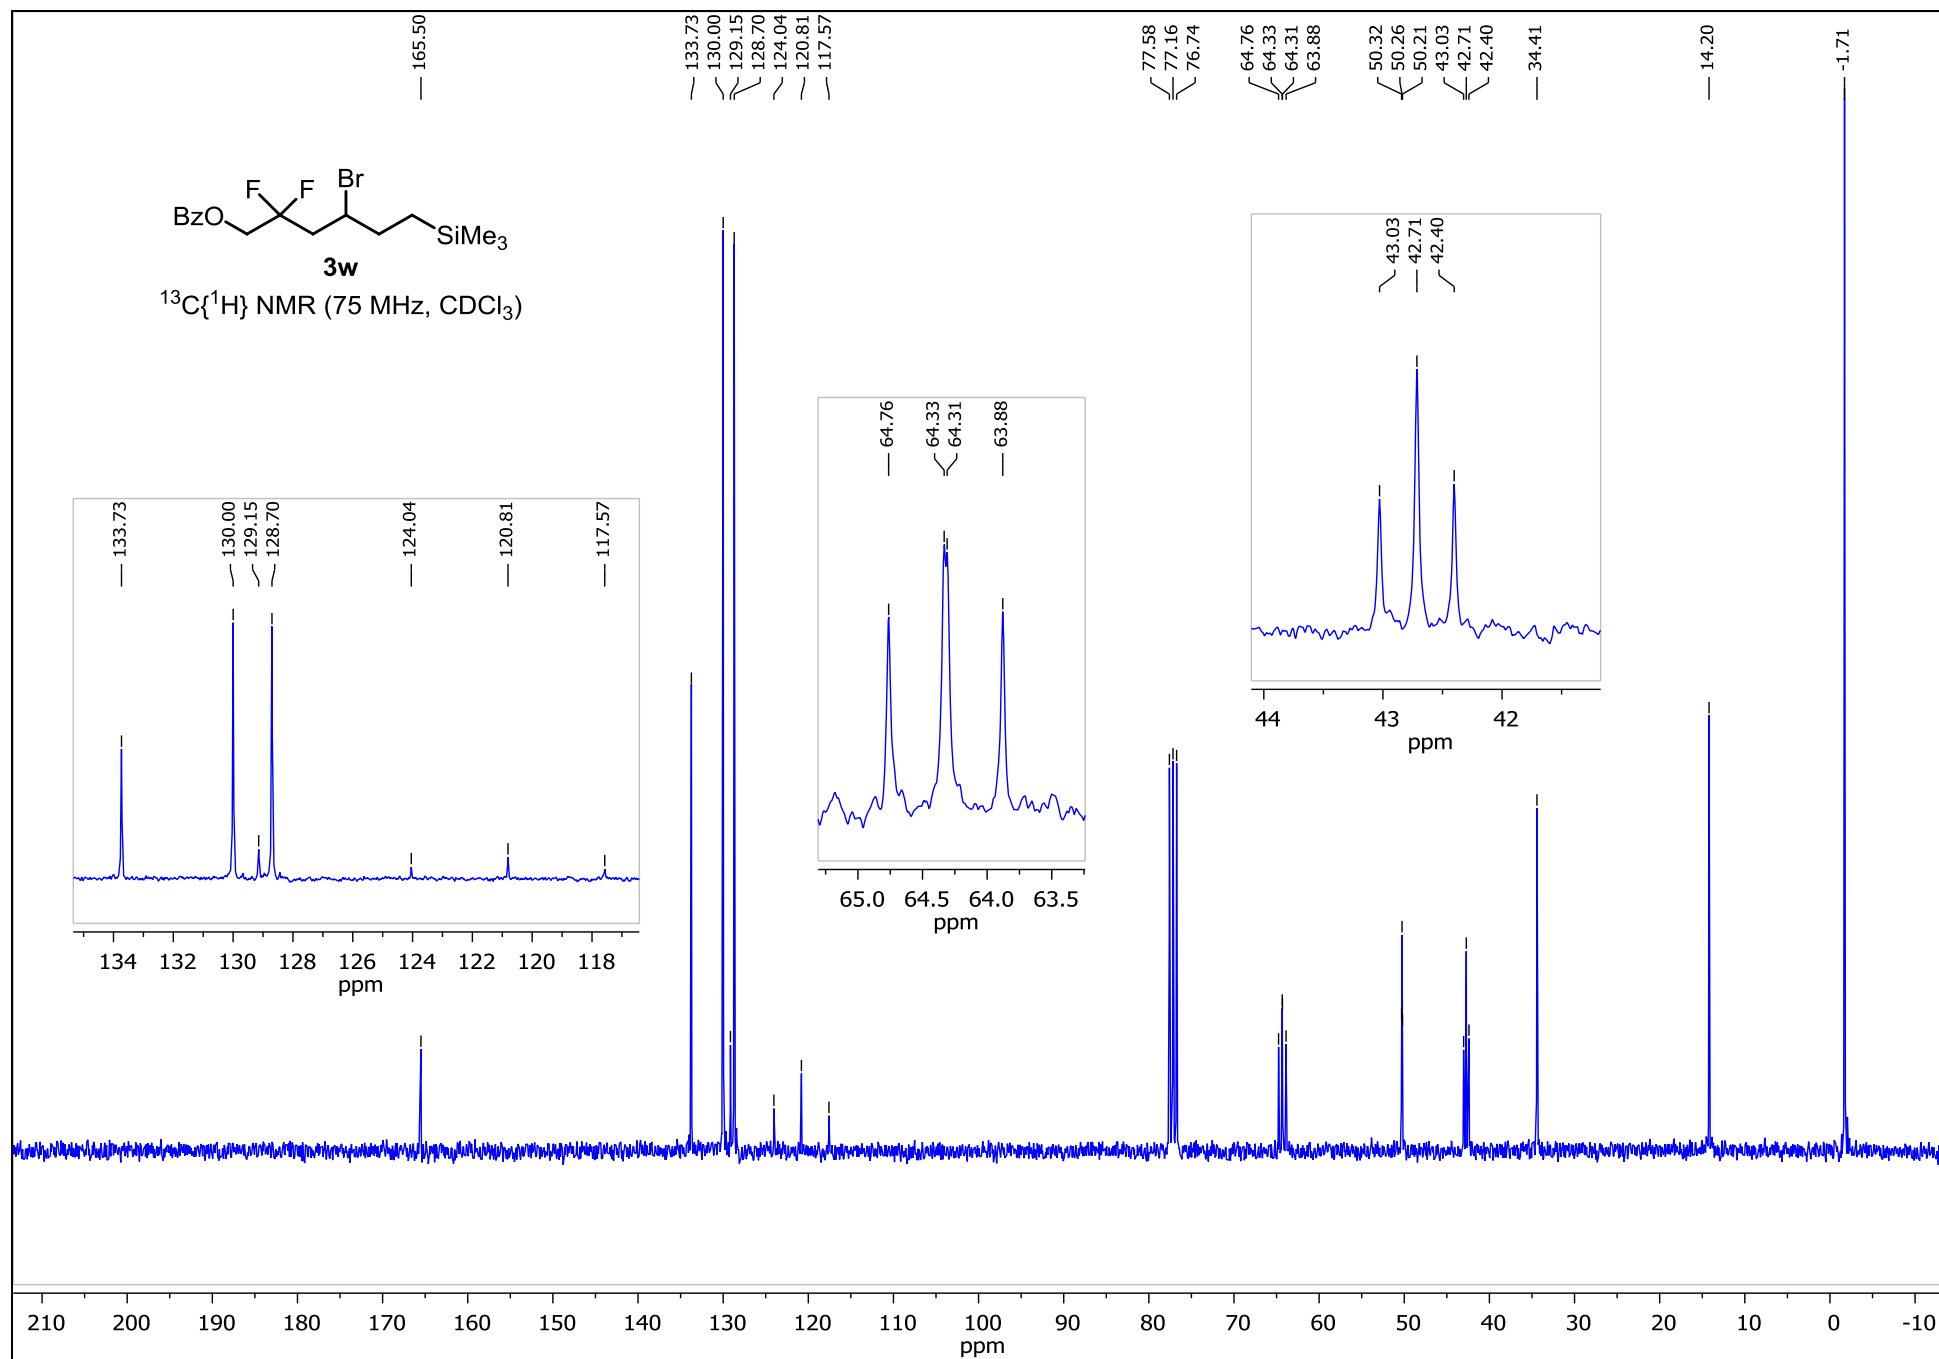

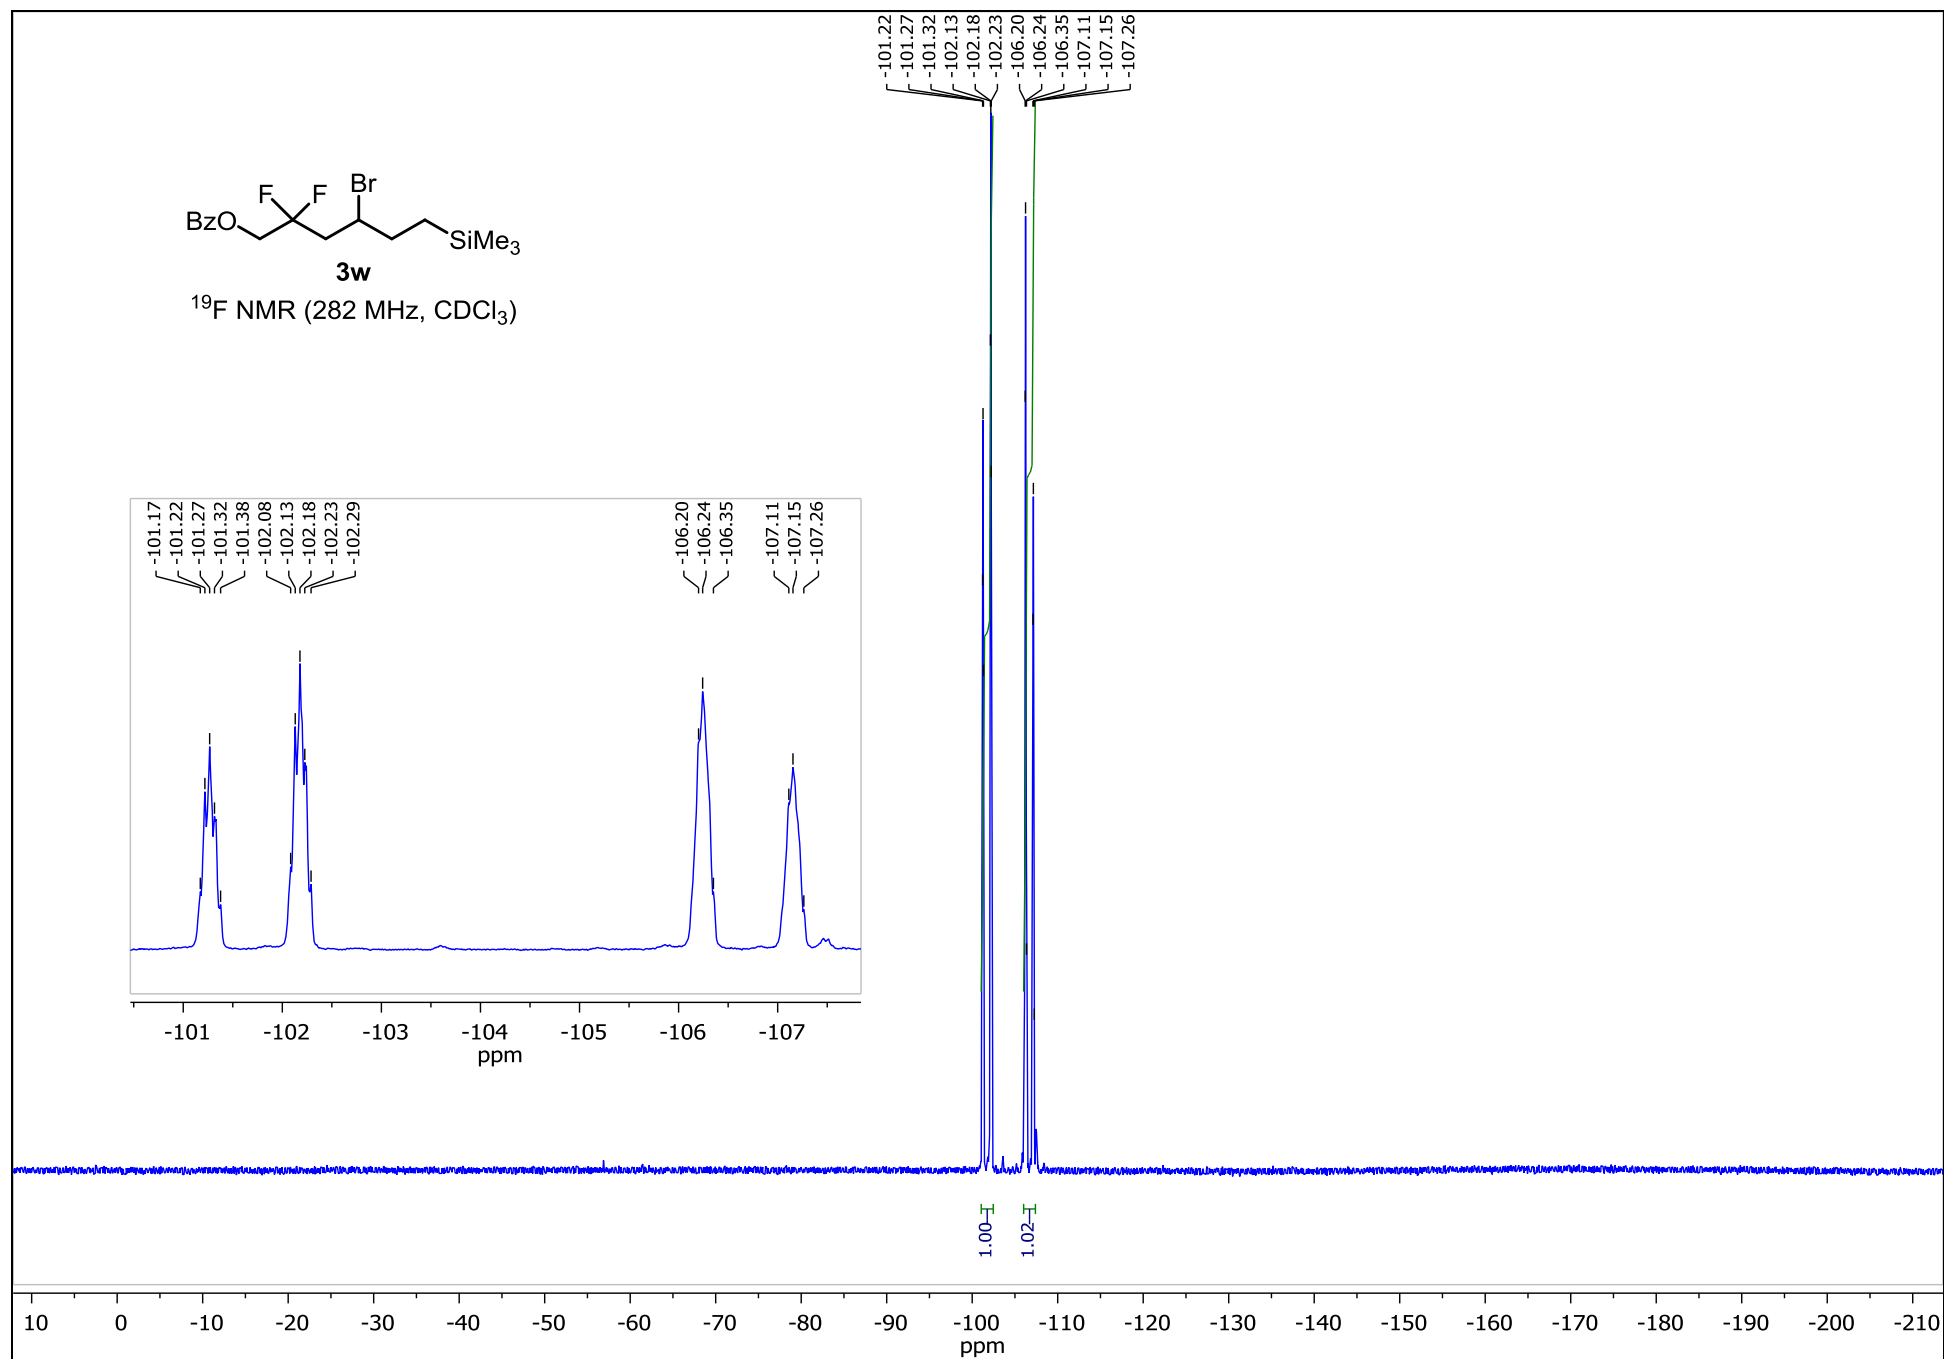

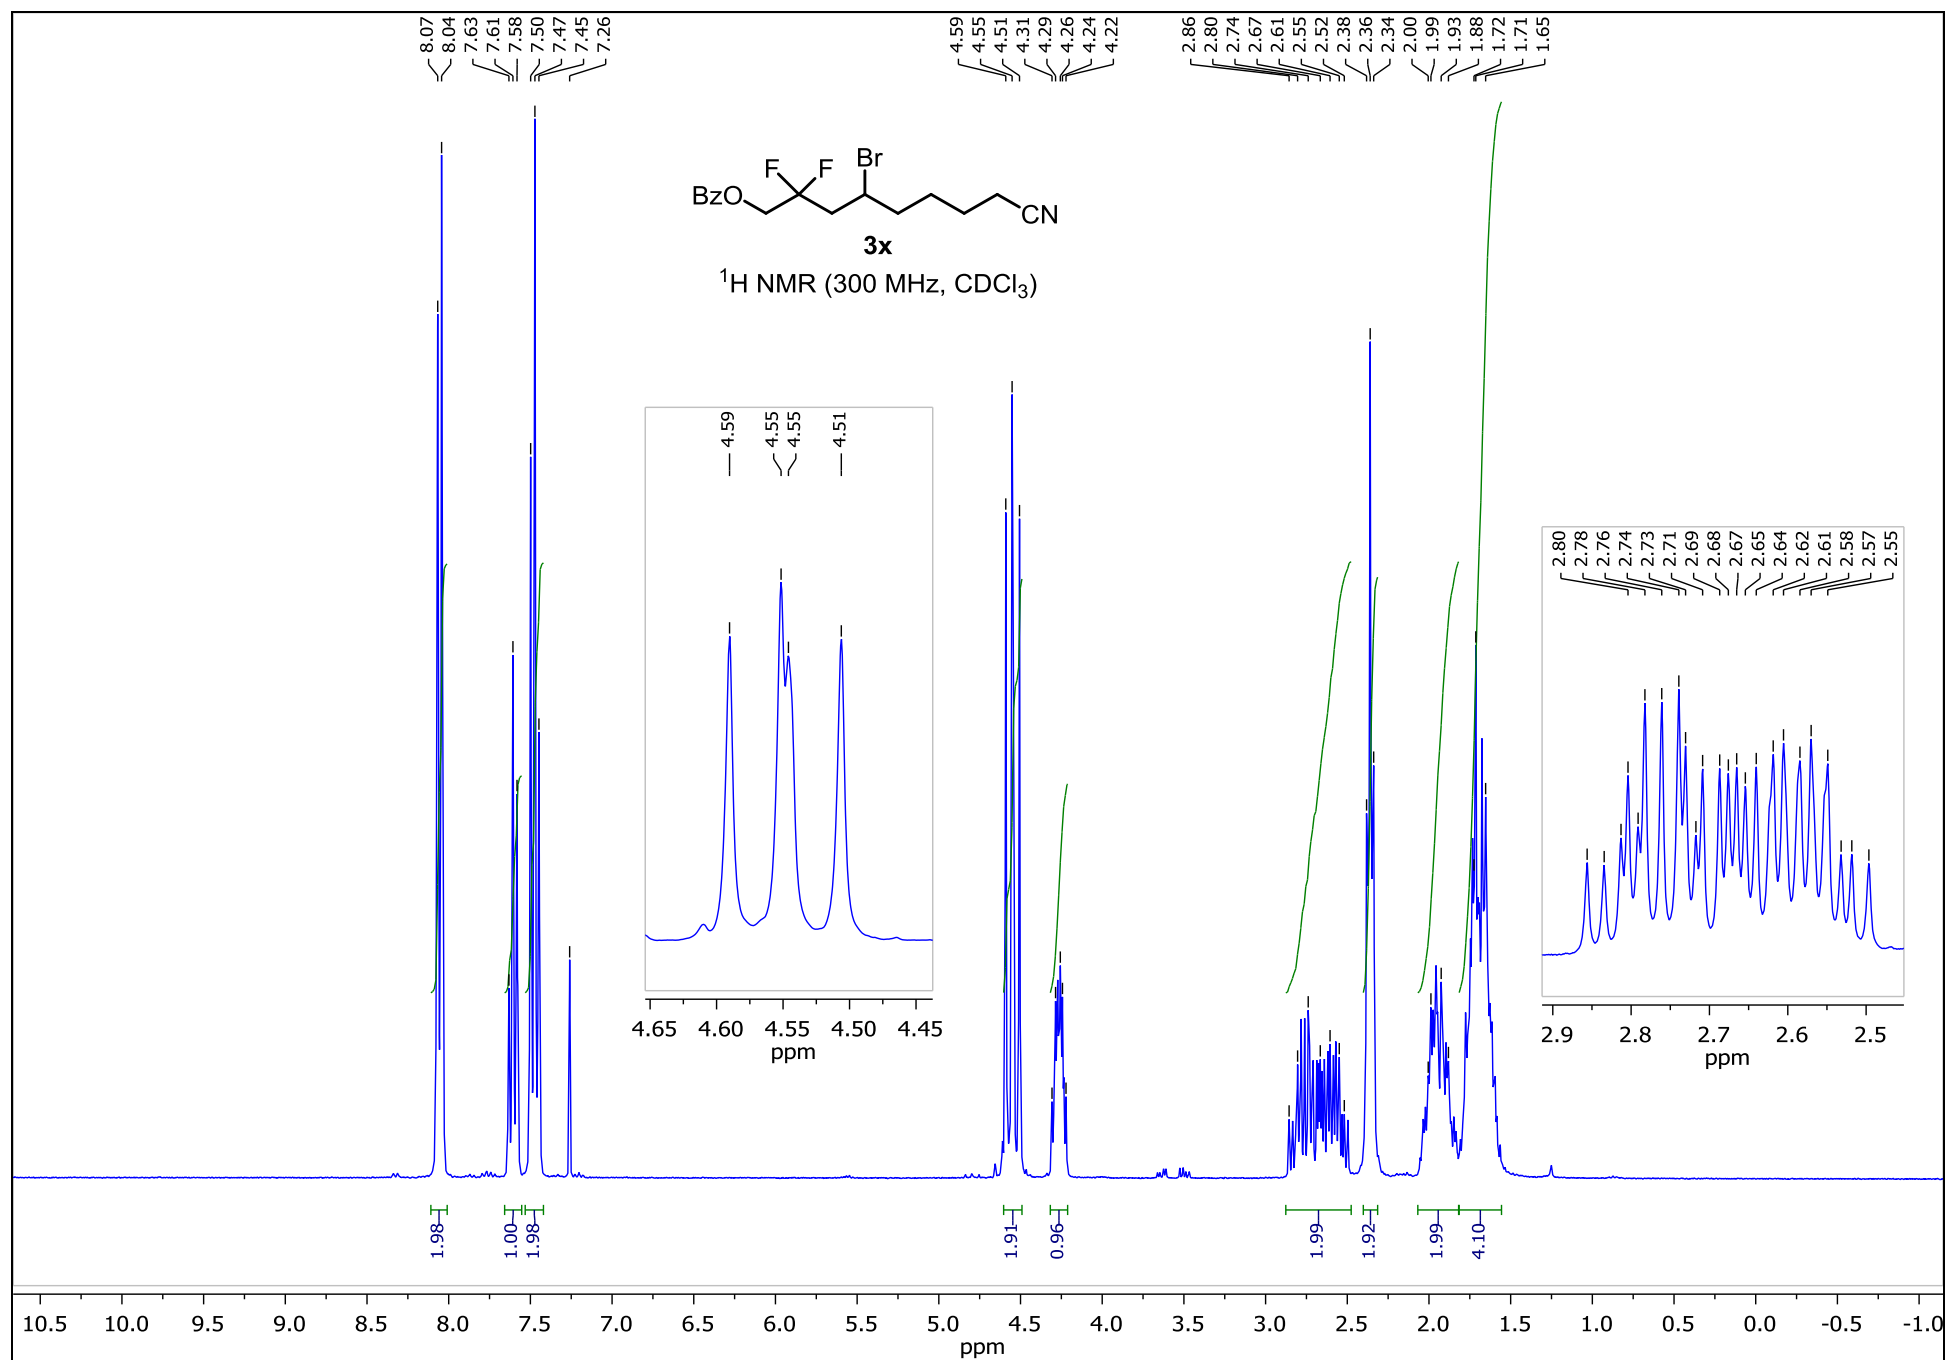

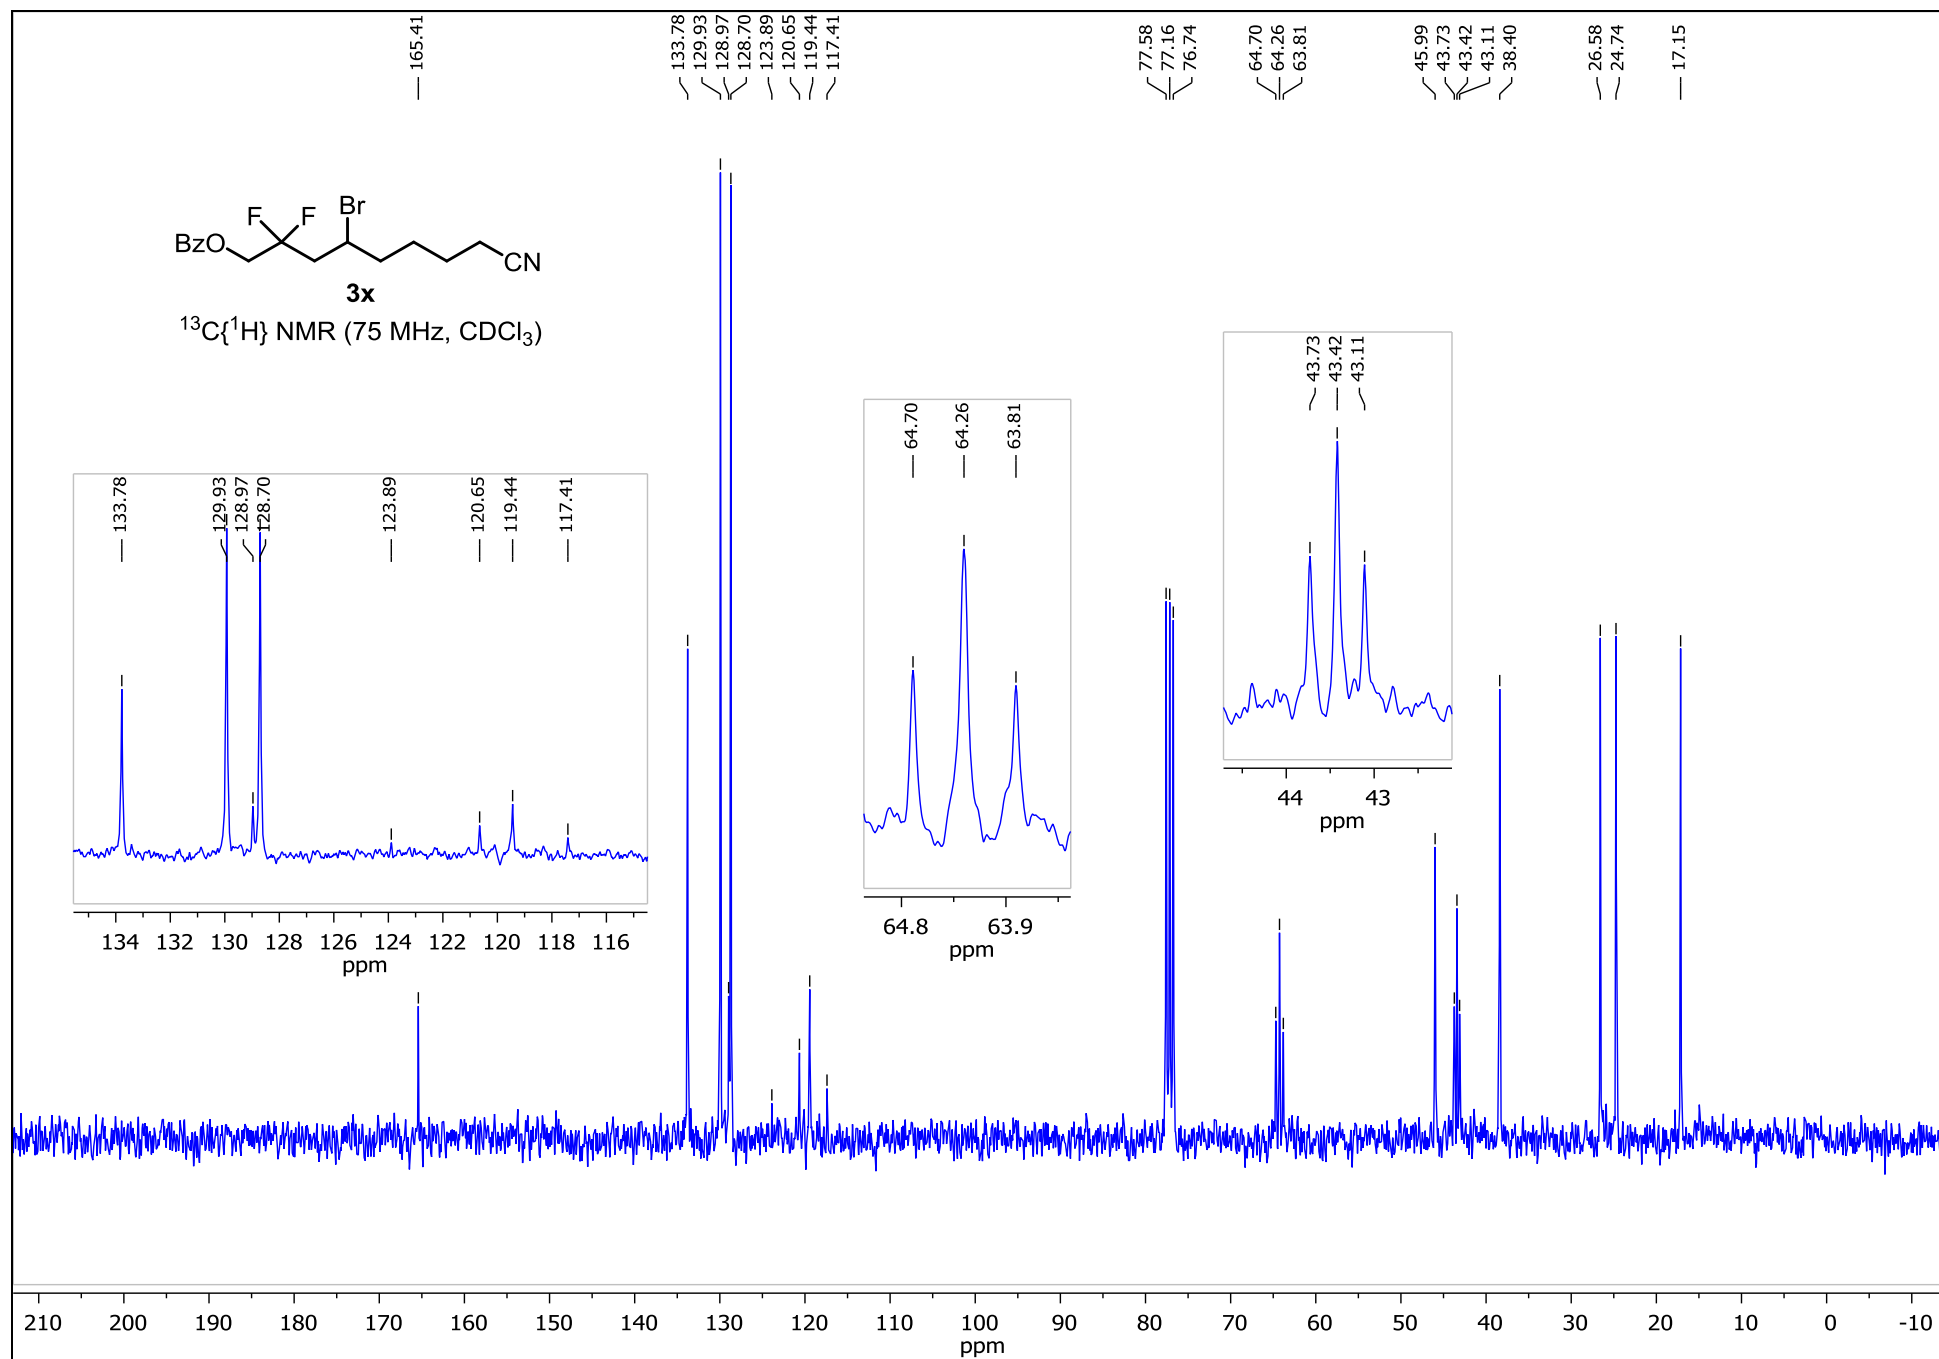

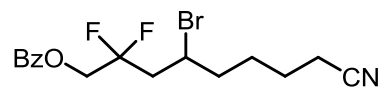**3x** $^{19}\text{F}$  NMR (282 MHz,  $\text{CDCl}_3$ )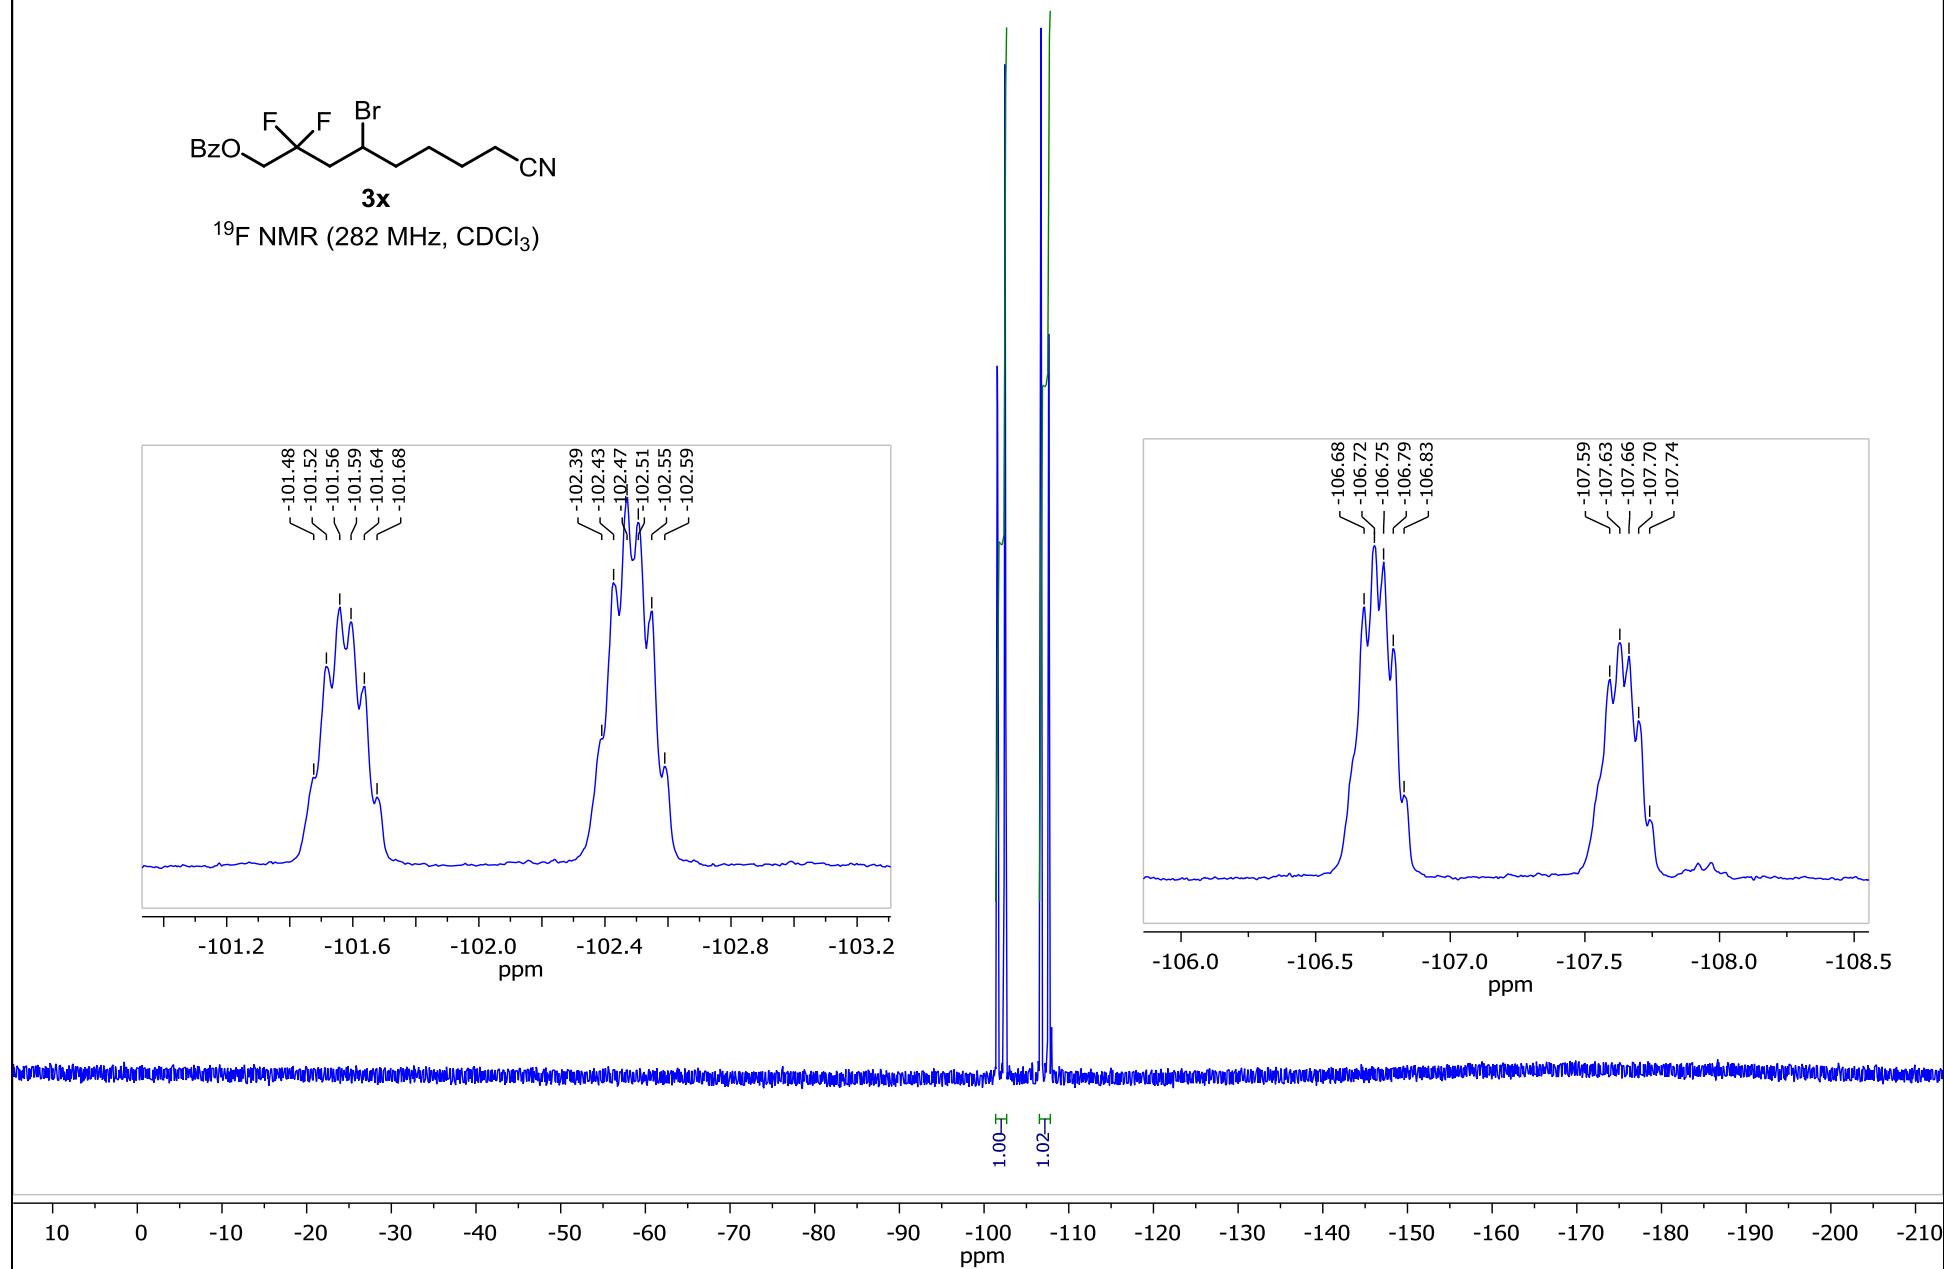



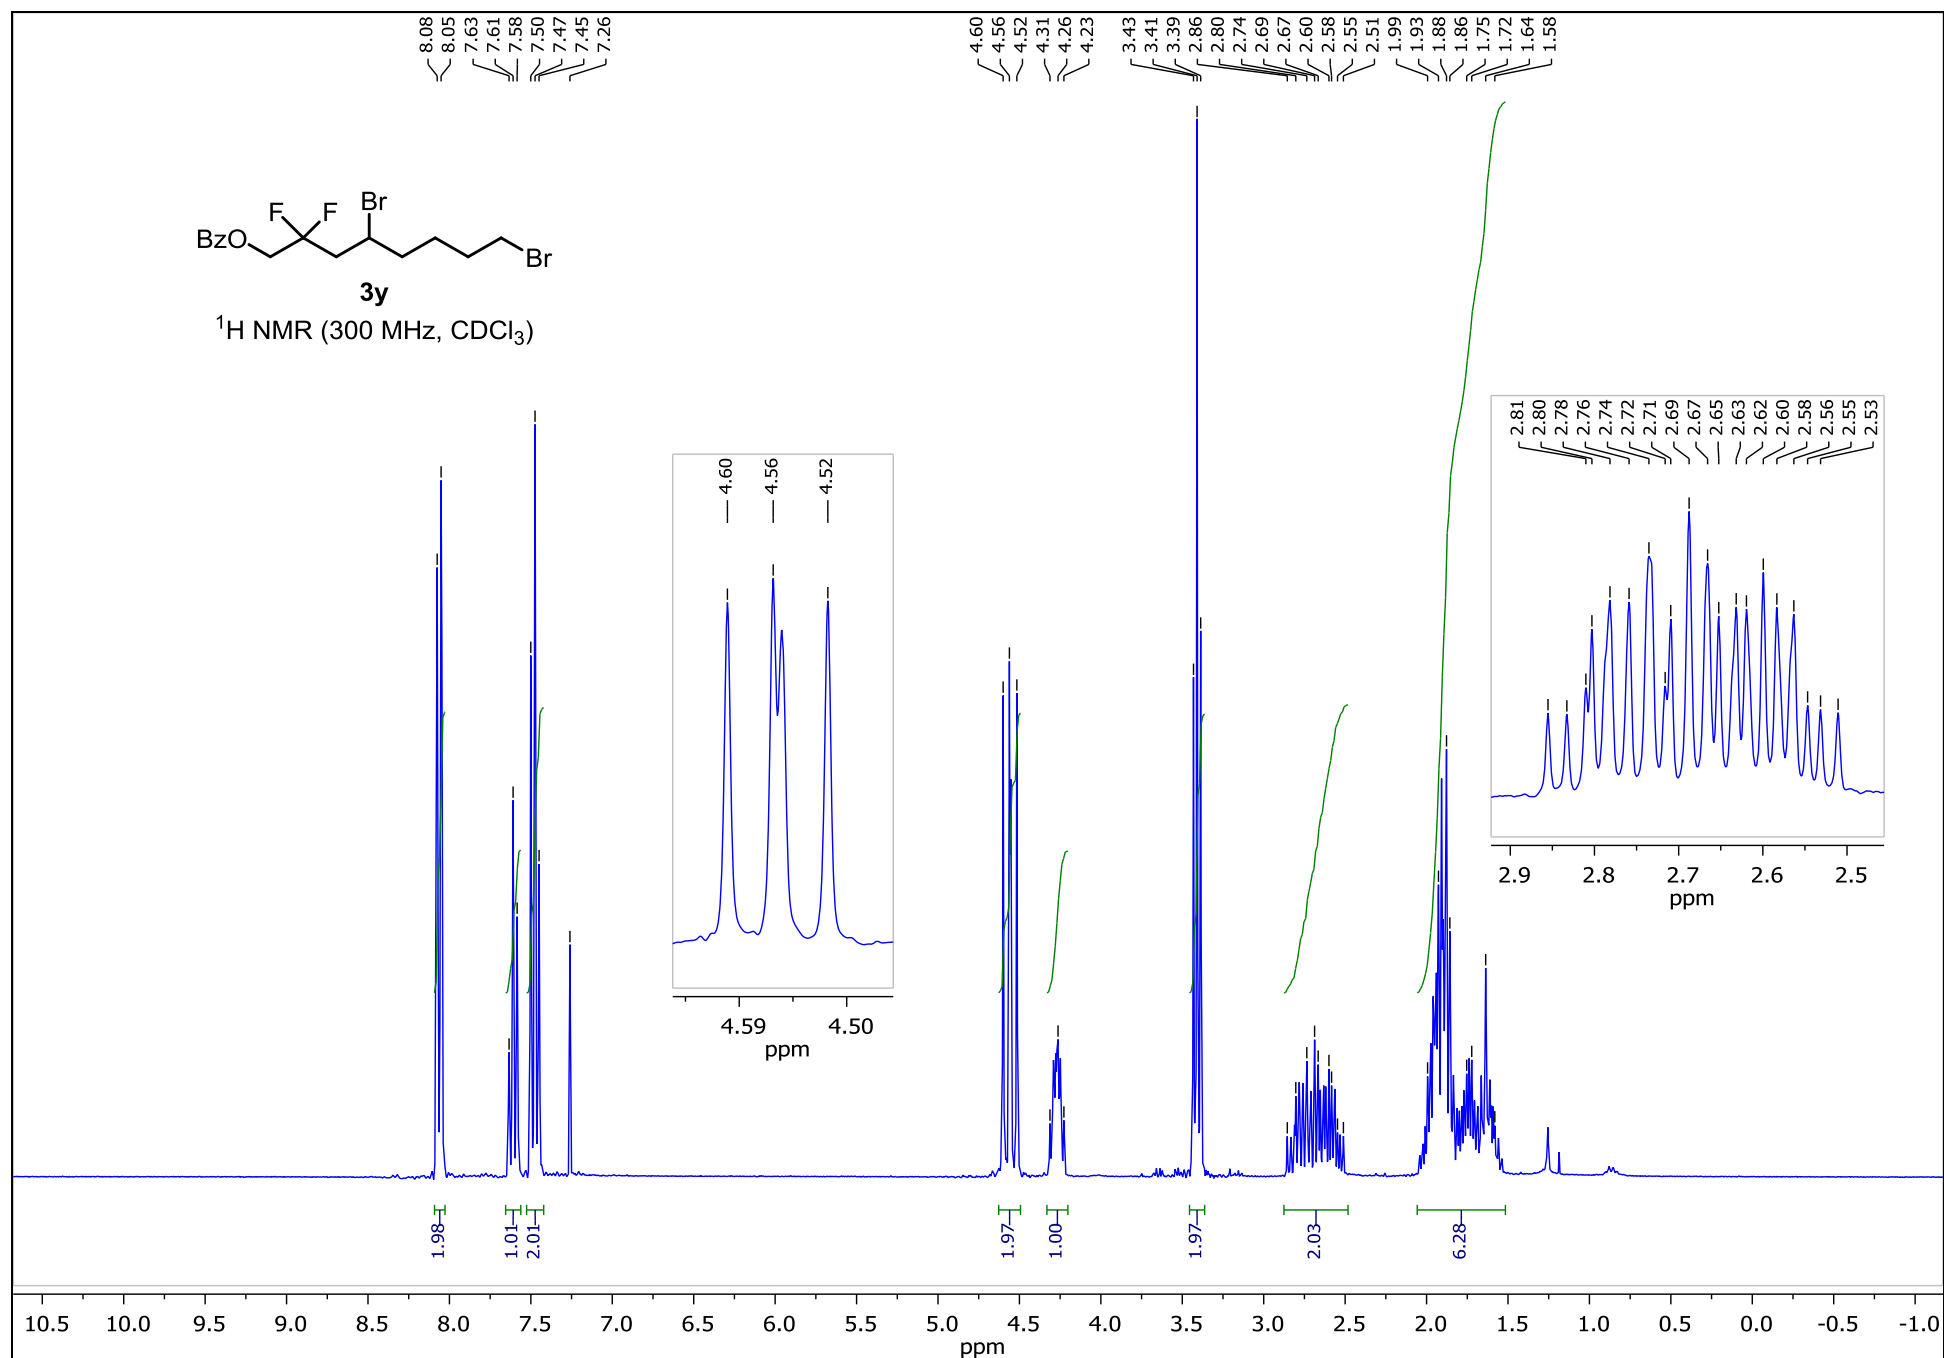

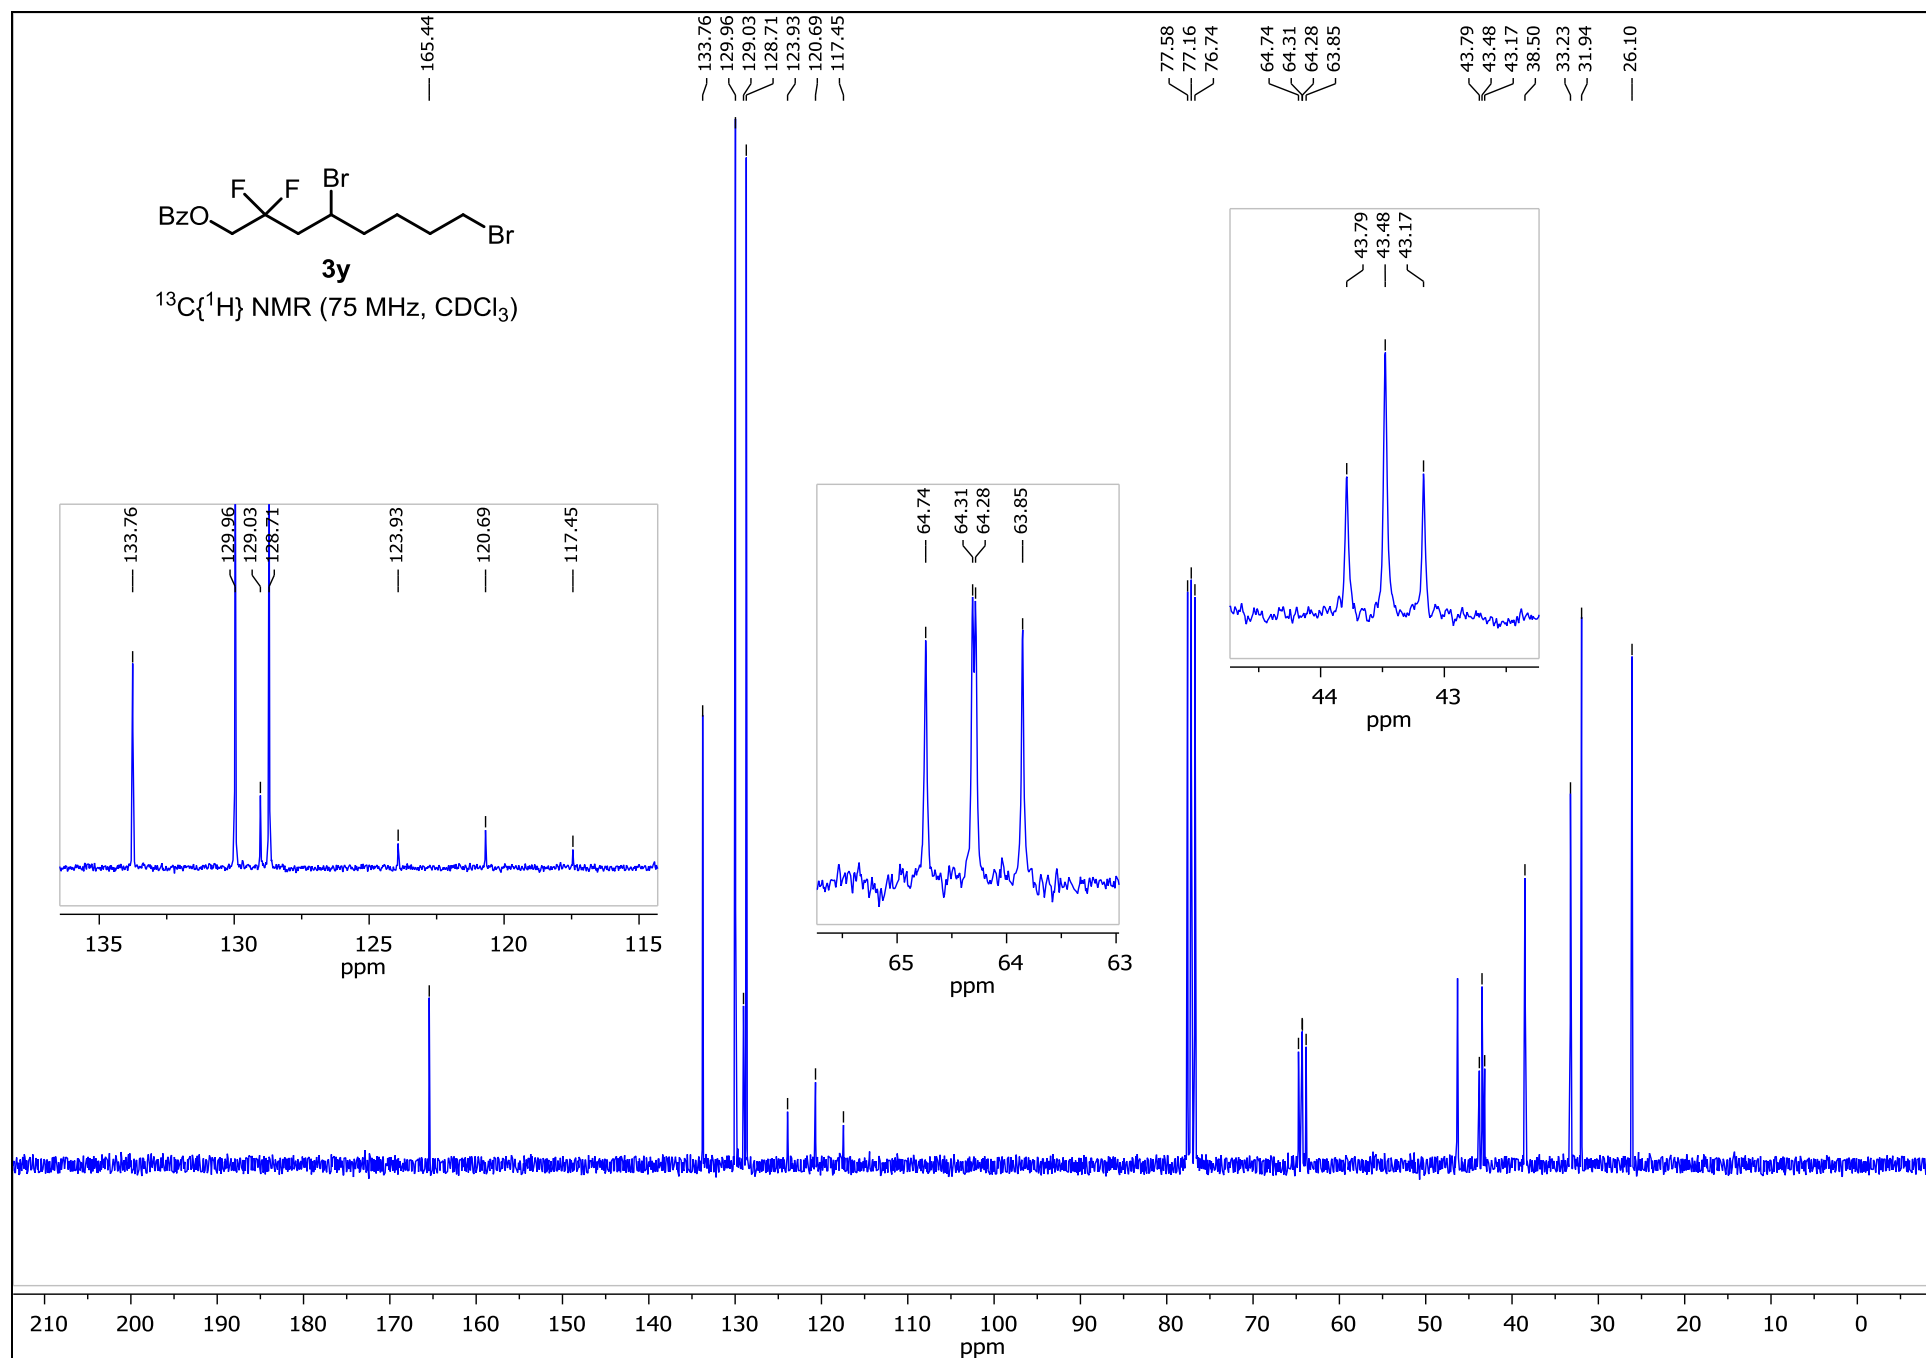

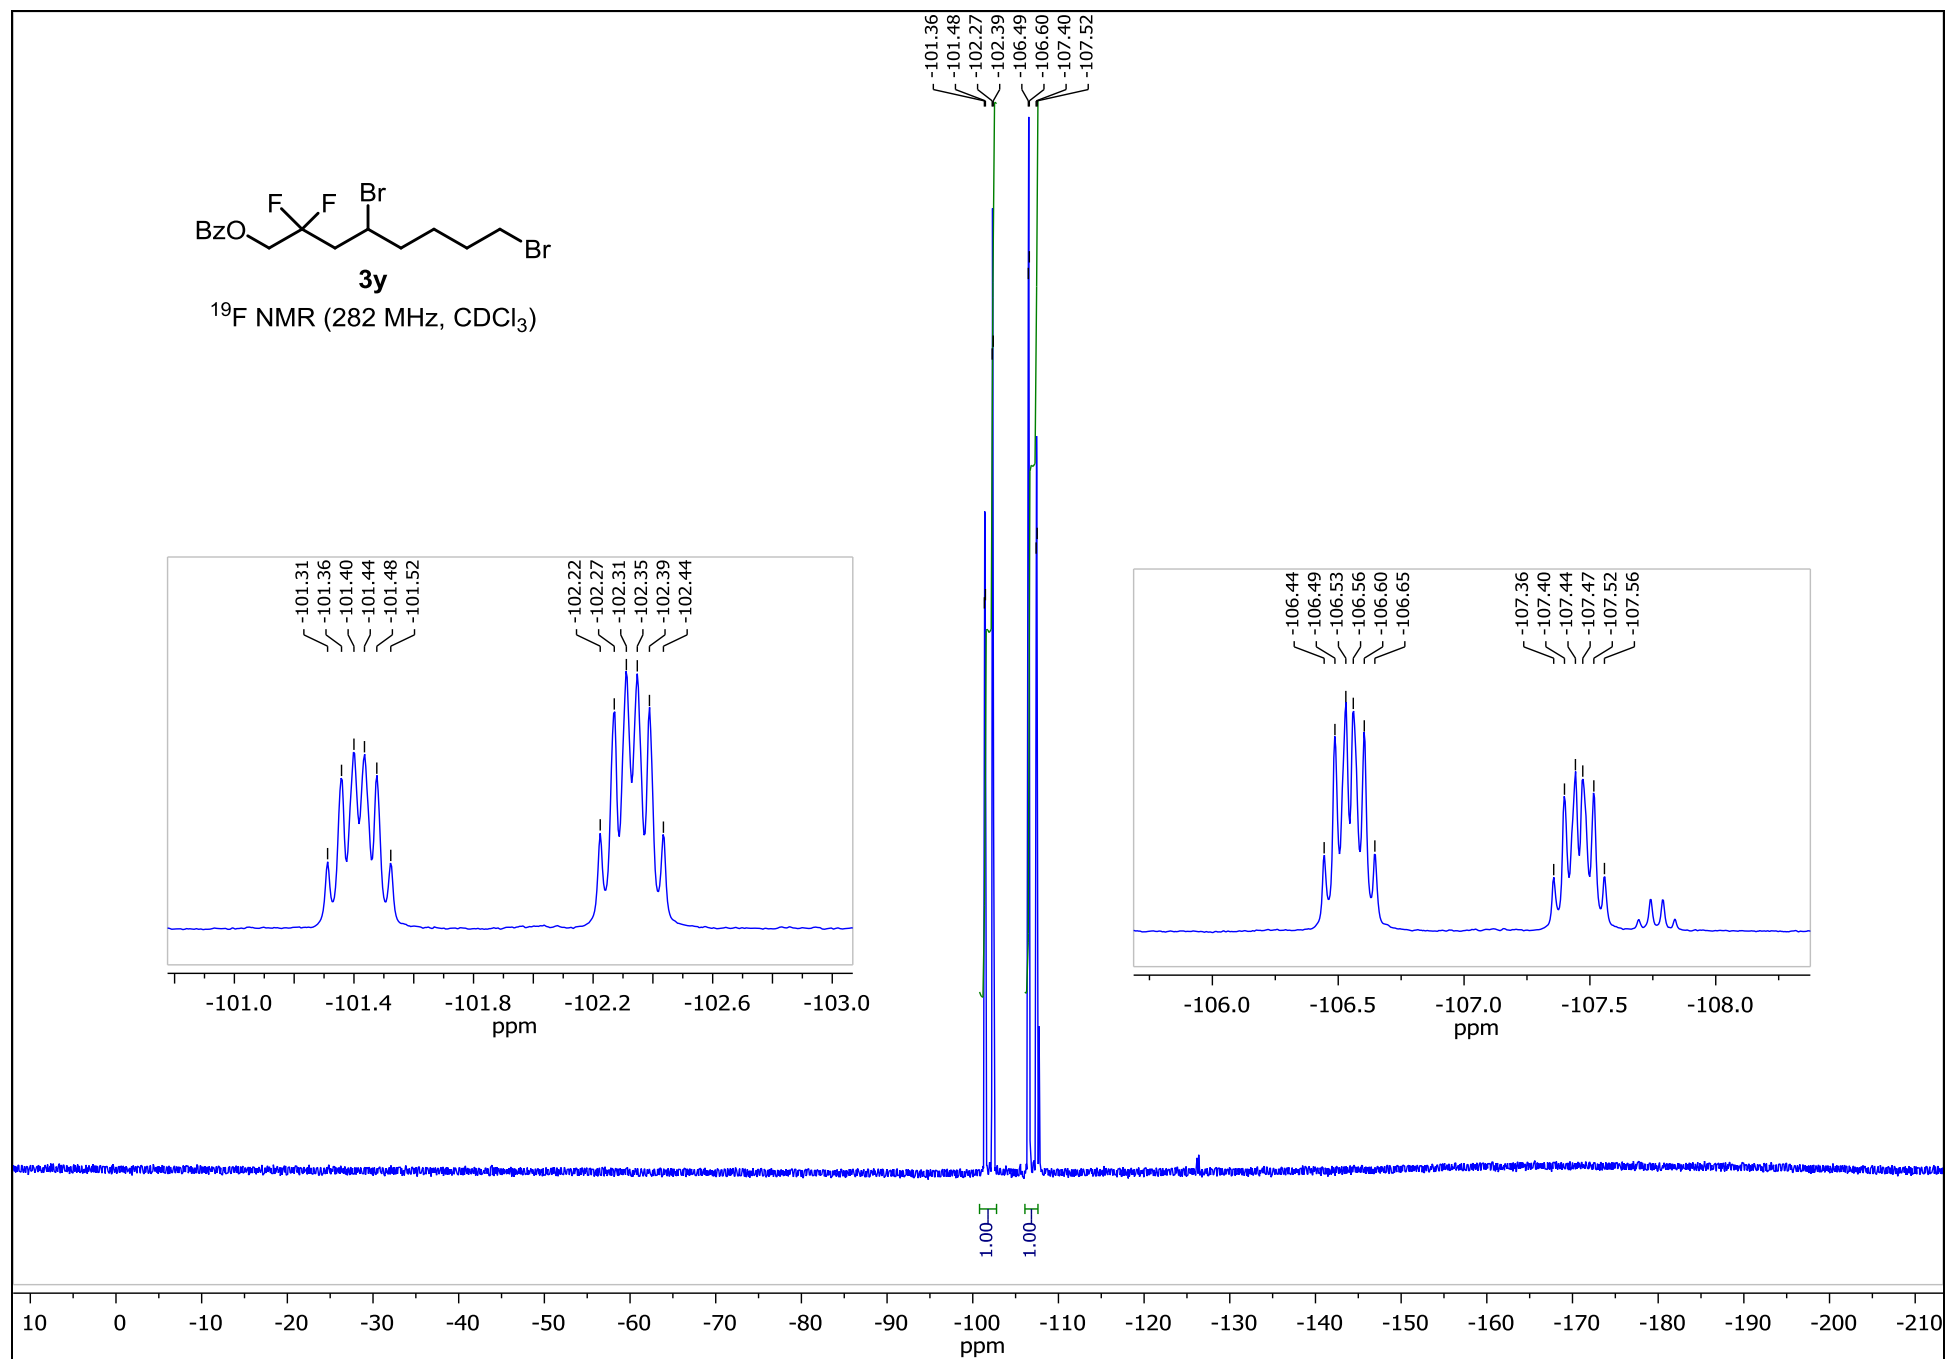

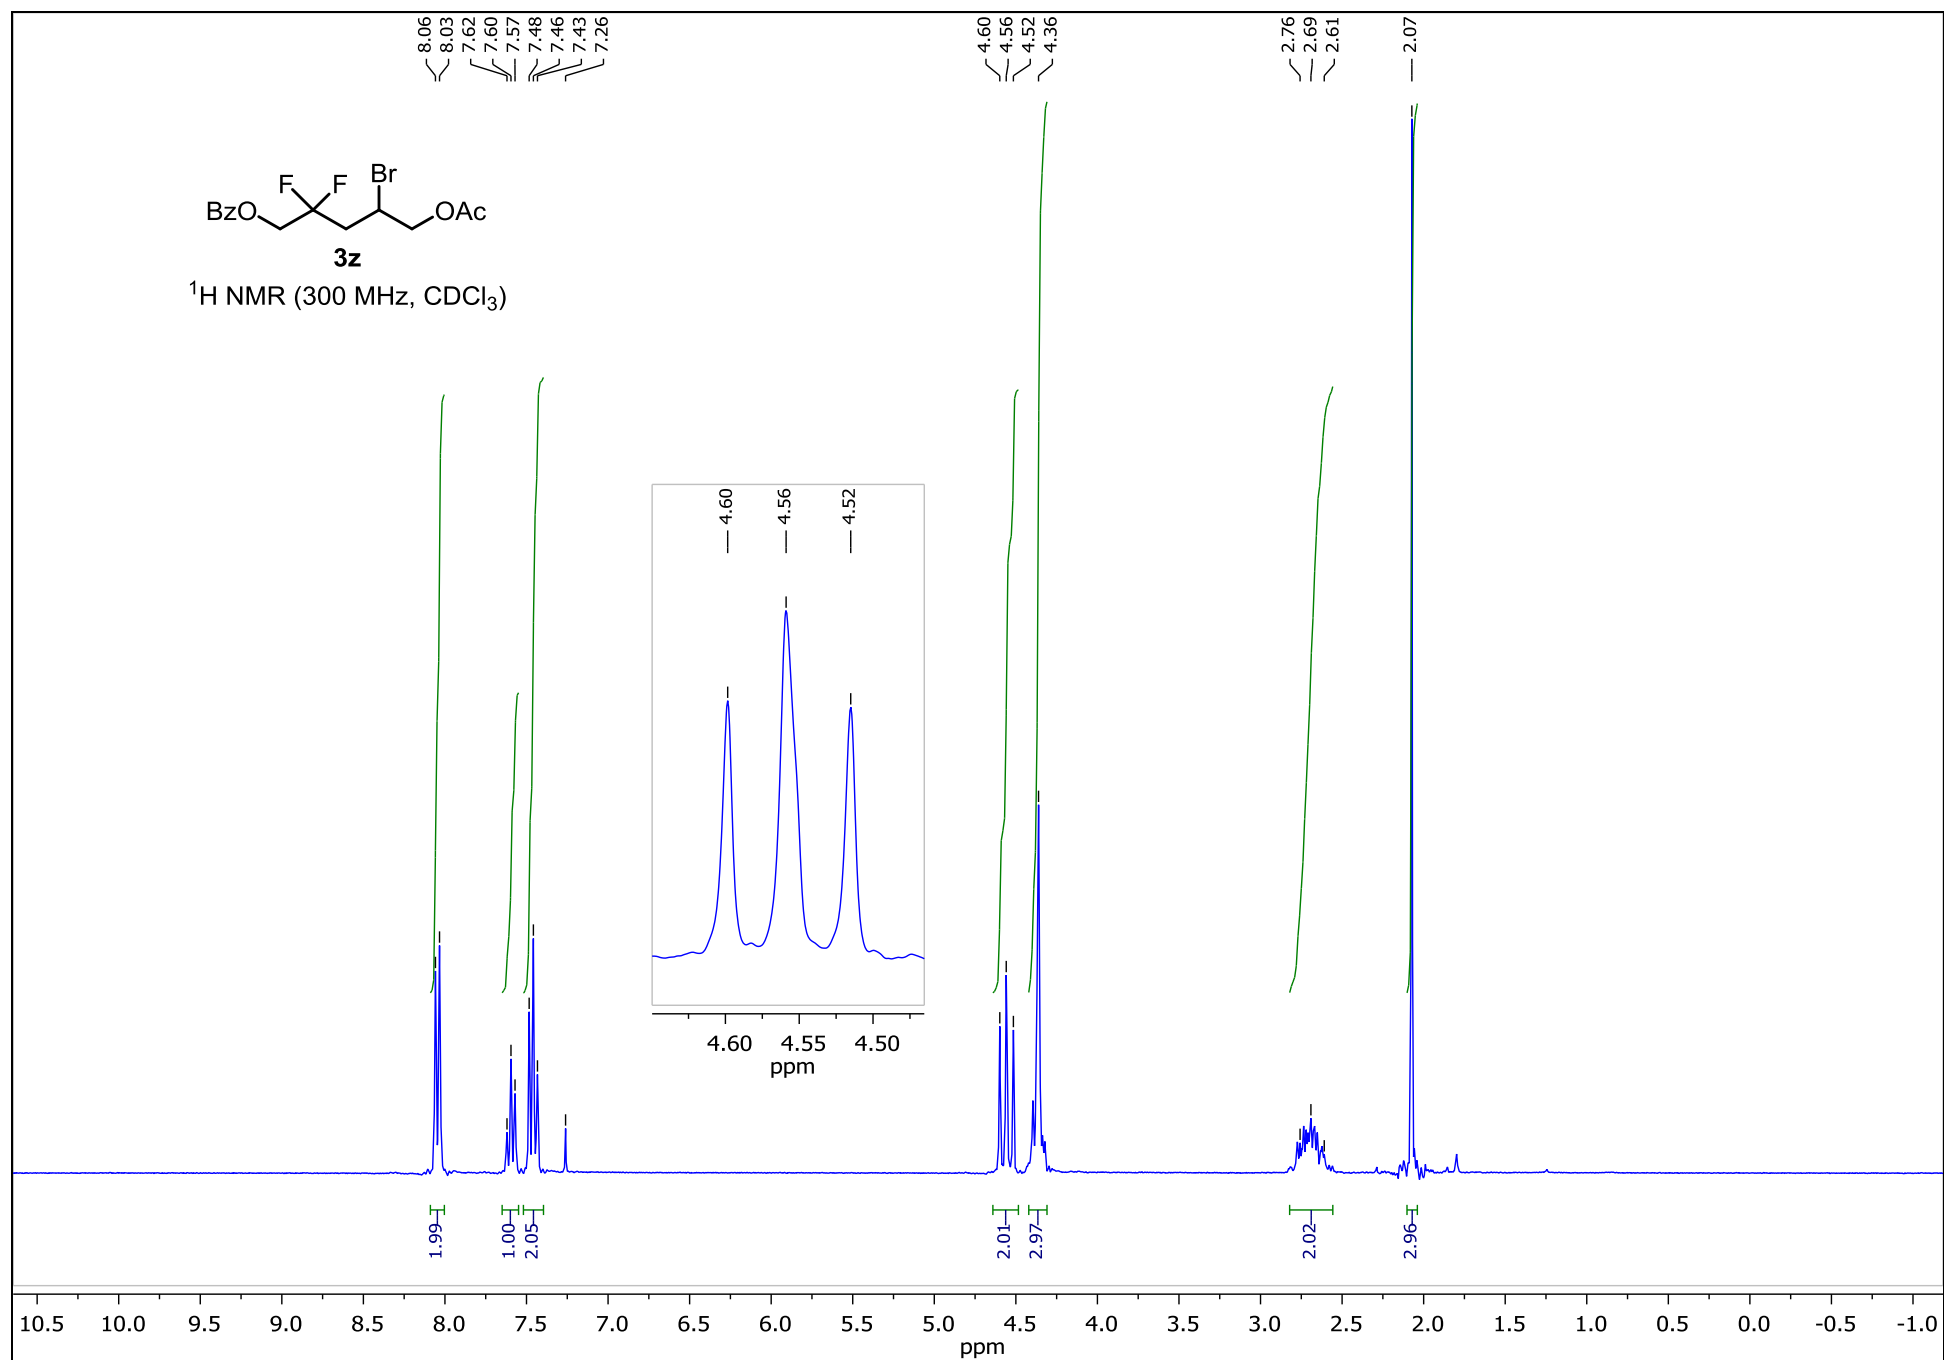

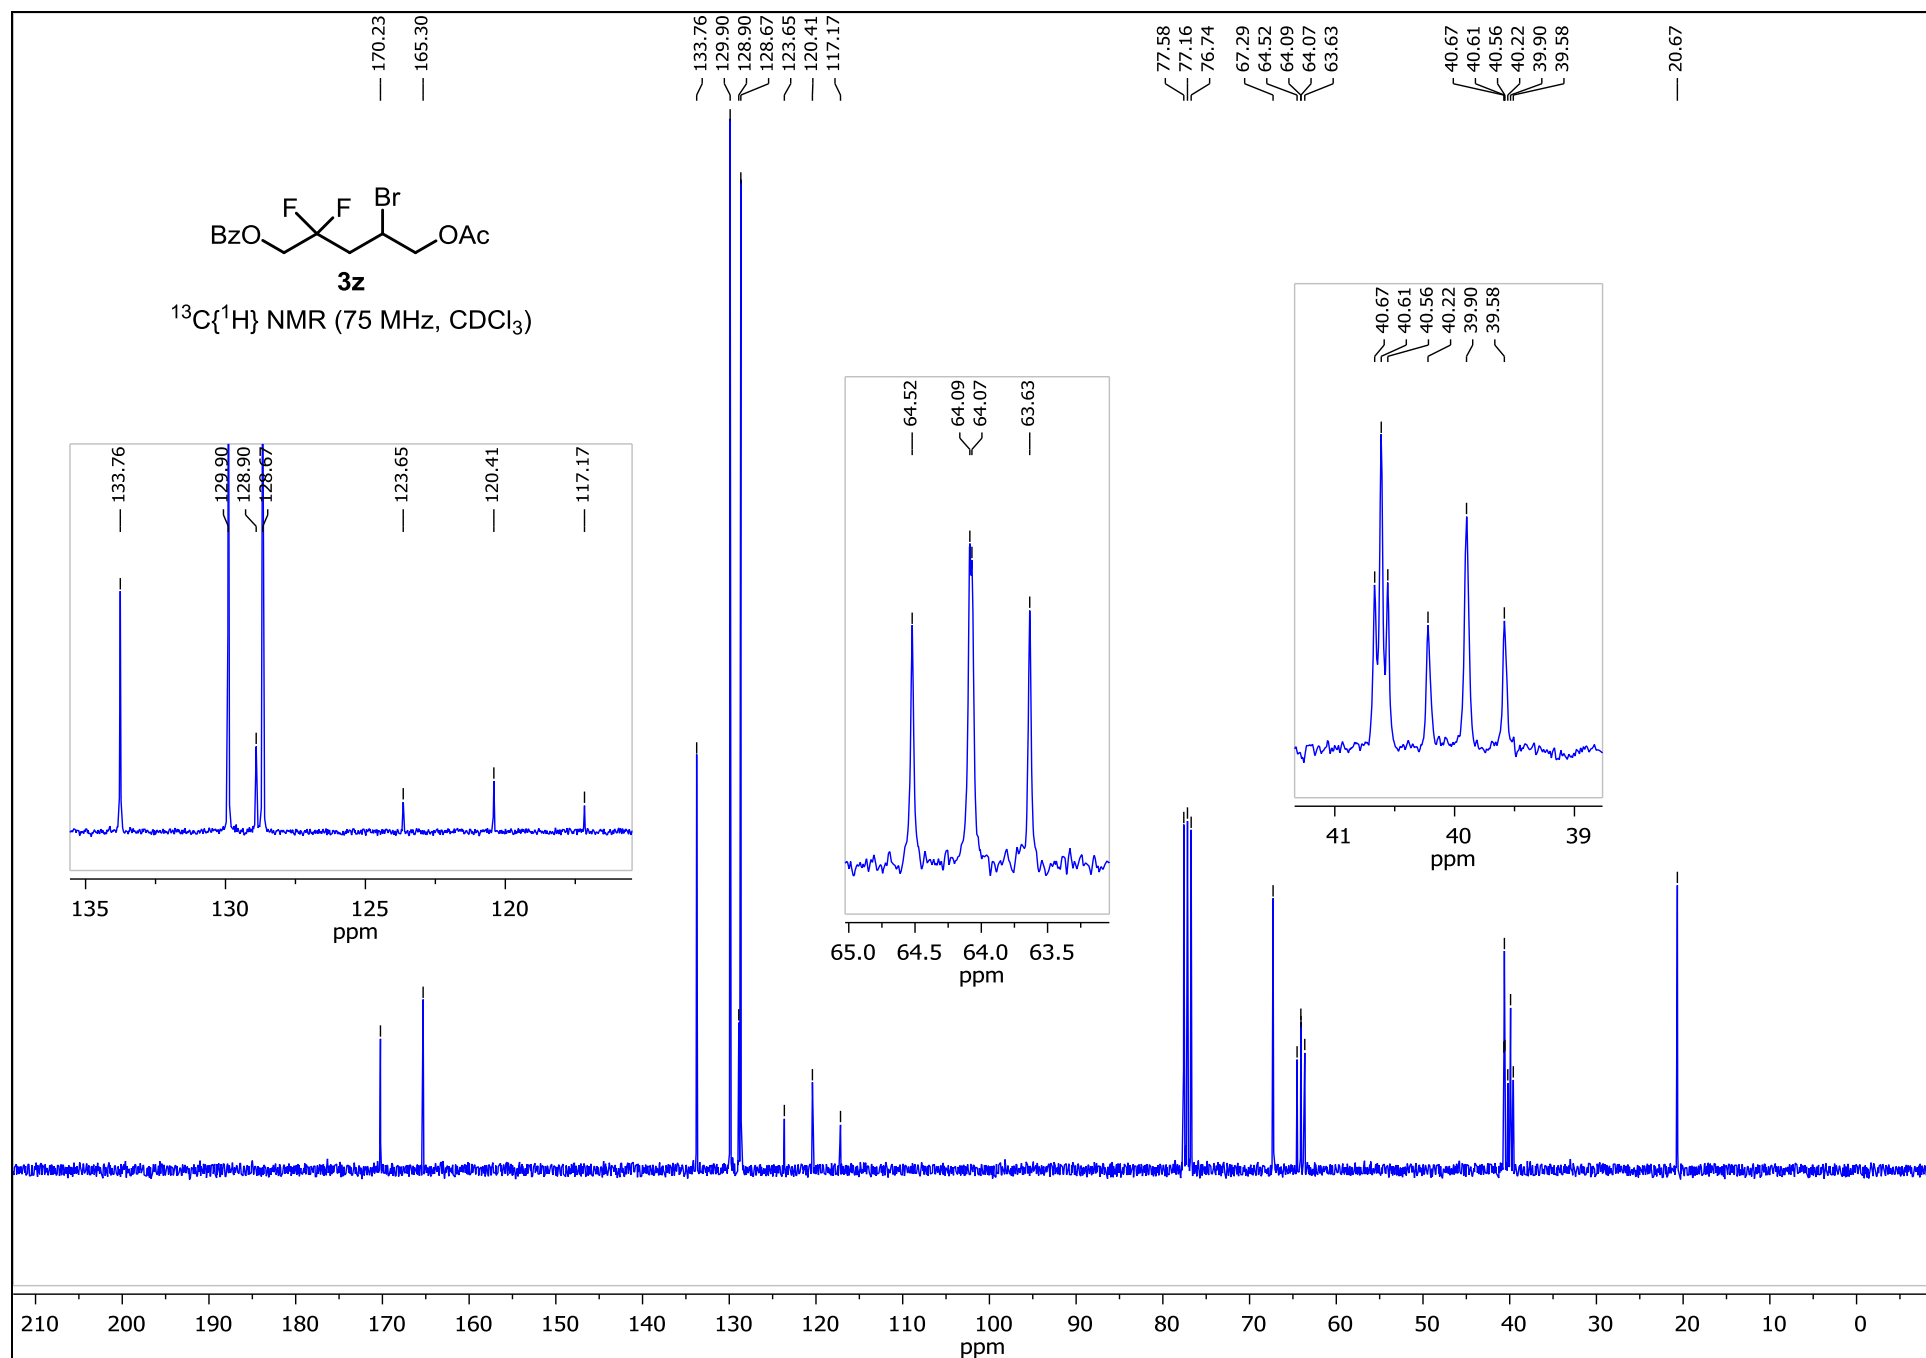

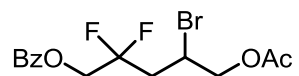**3z**<sup>19</sup>F NMR (282 MHz, CDCl<sub>3</sub>)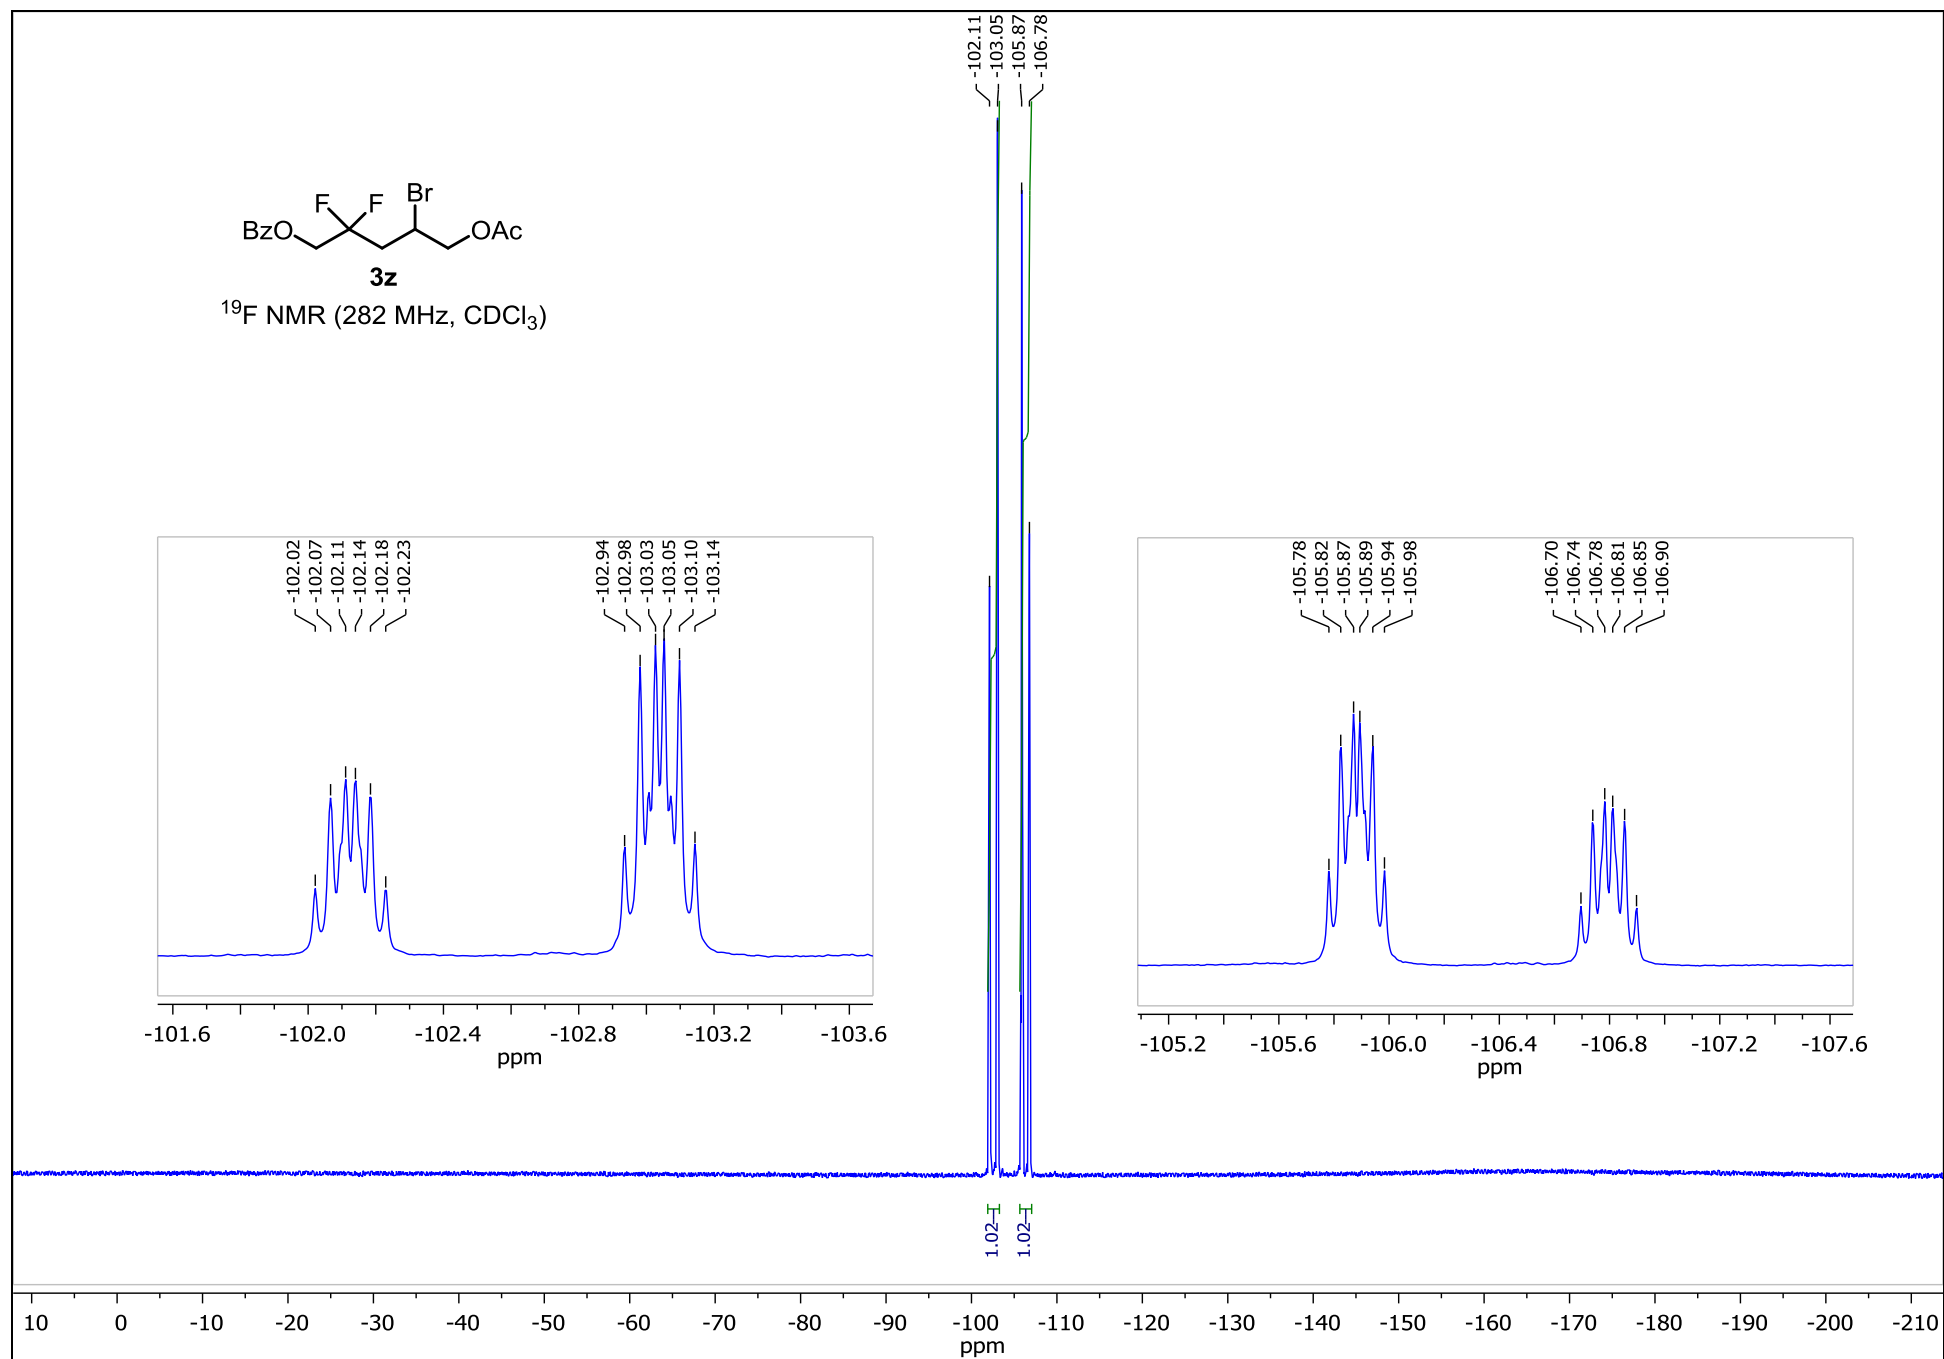

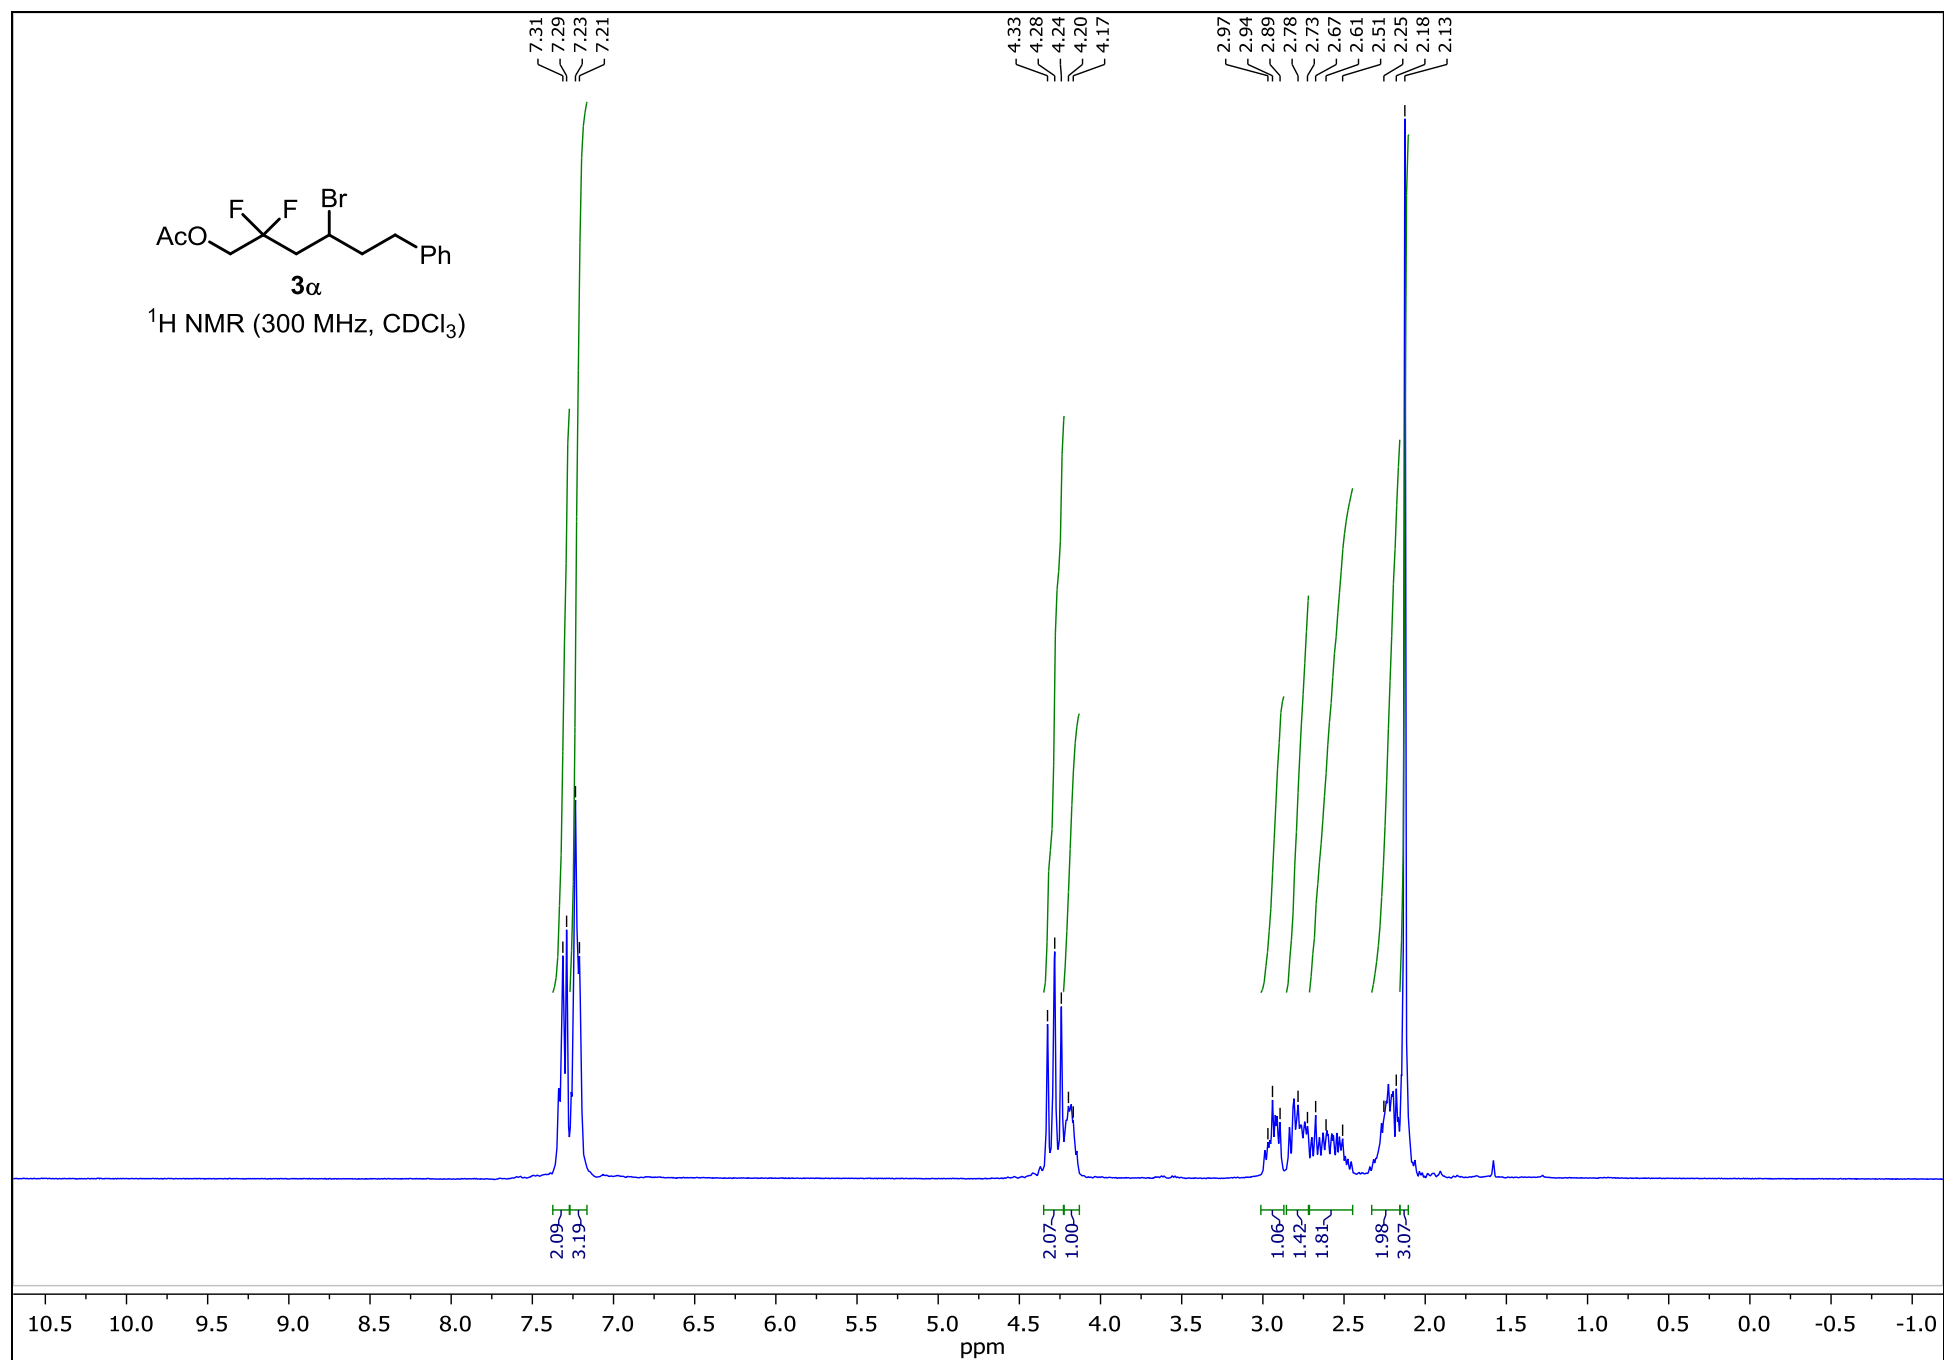

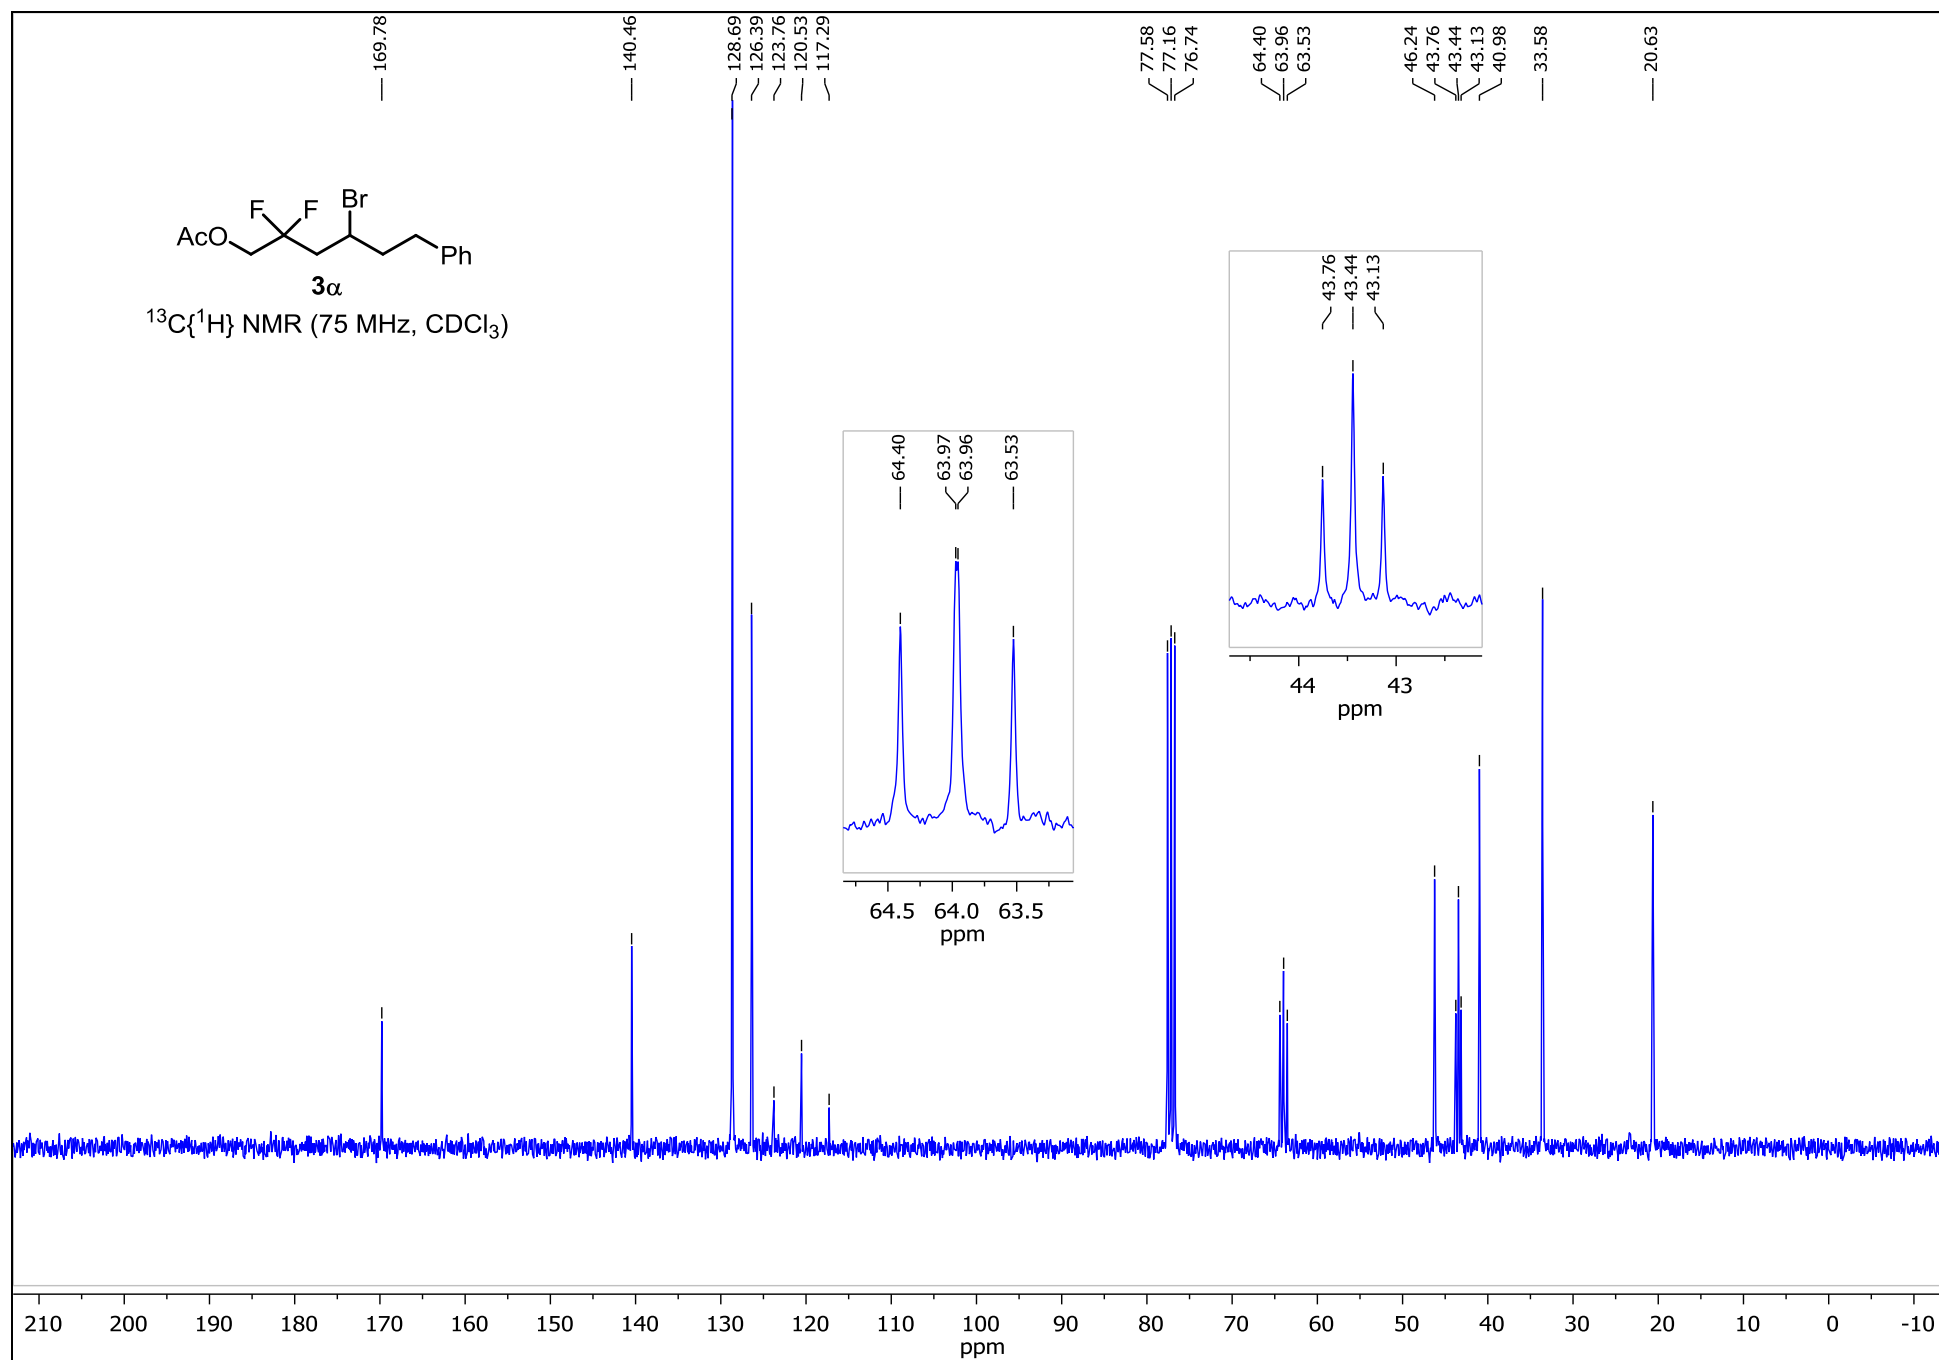



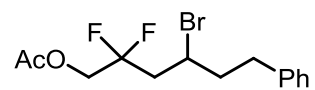**3 $\alpha$**  $^{19}\text{F}$  NMR (282 MHz,  $\text{CDCl}_3$ )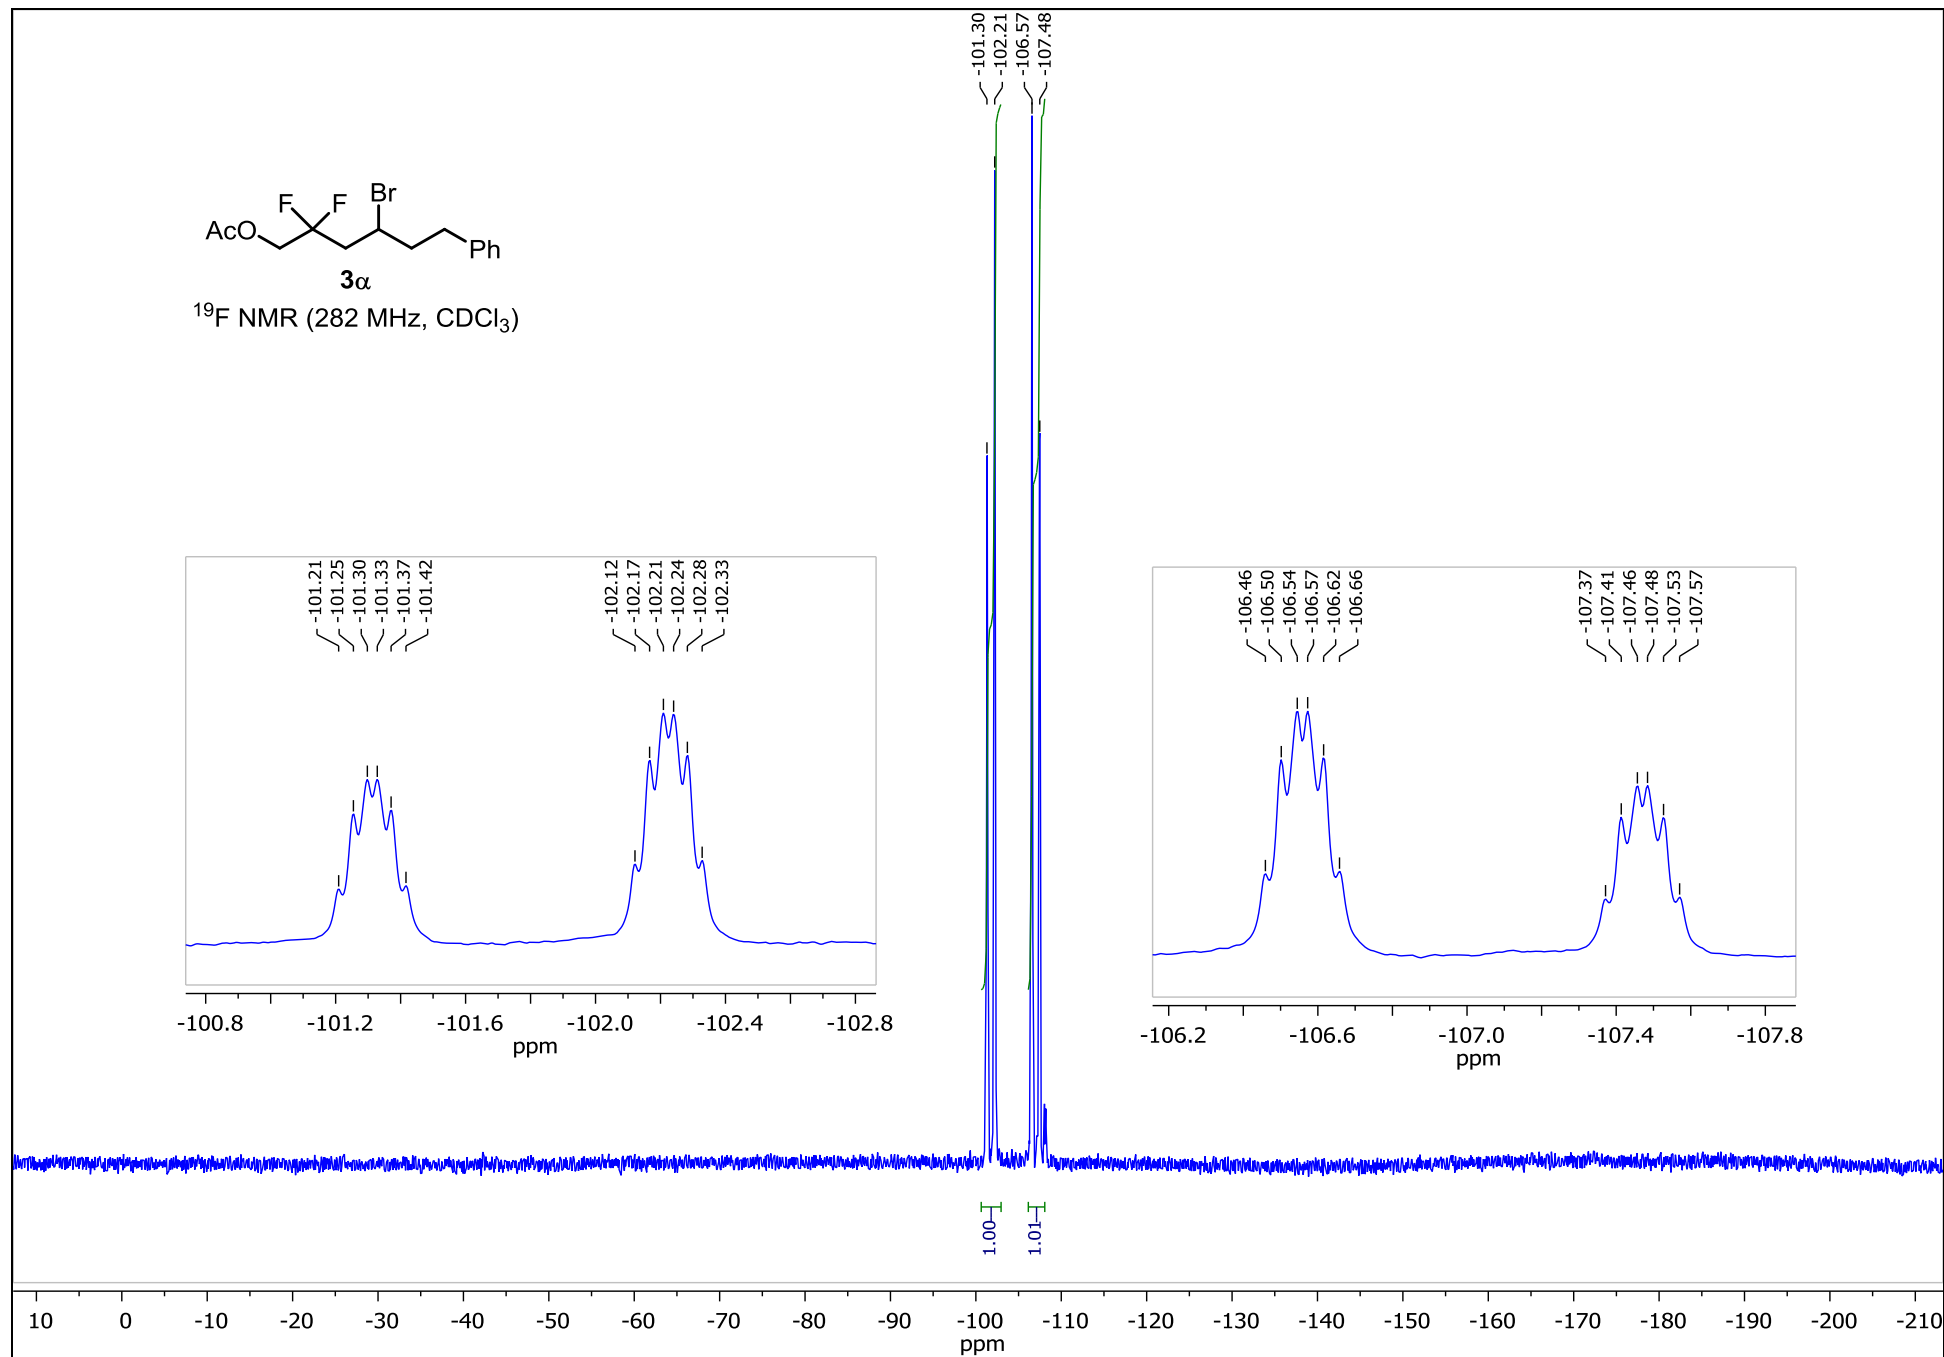

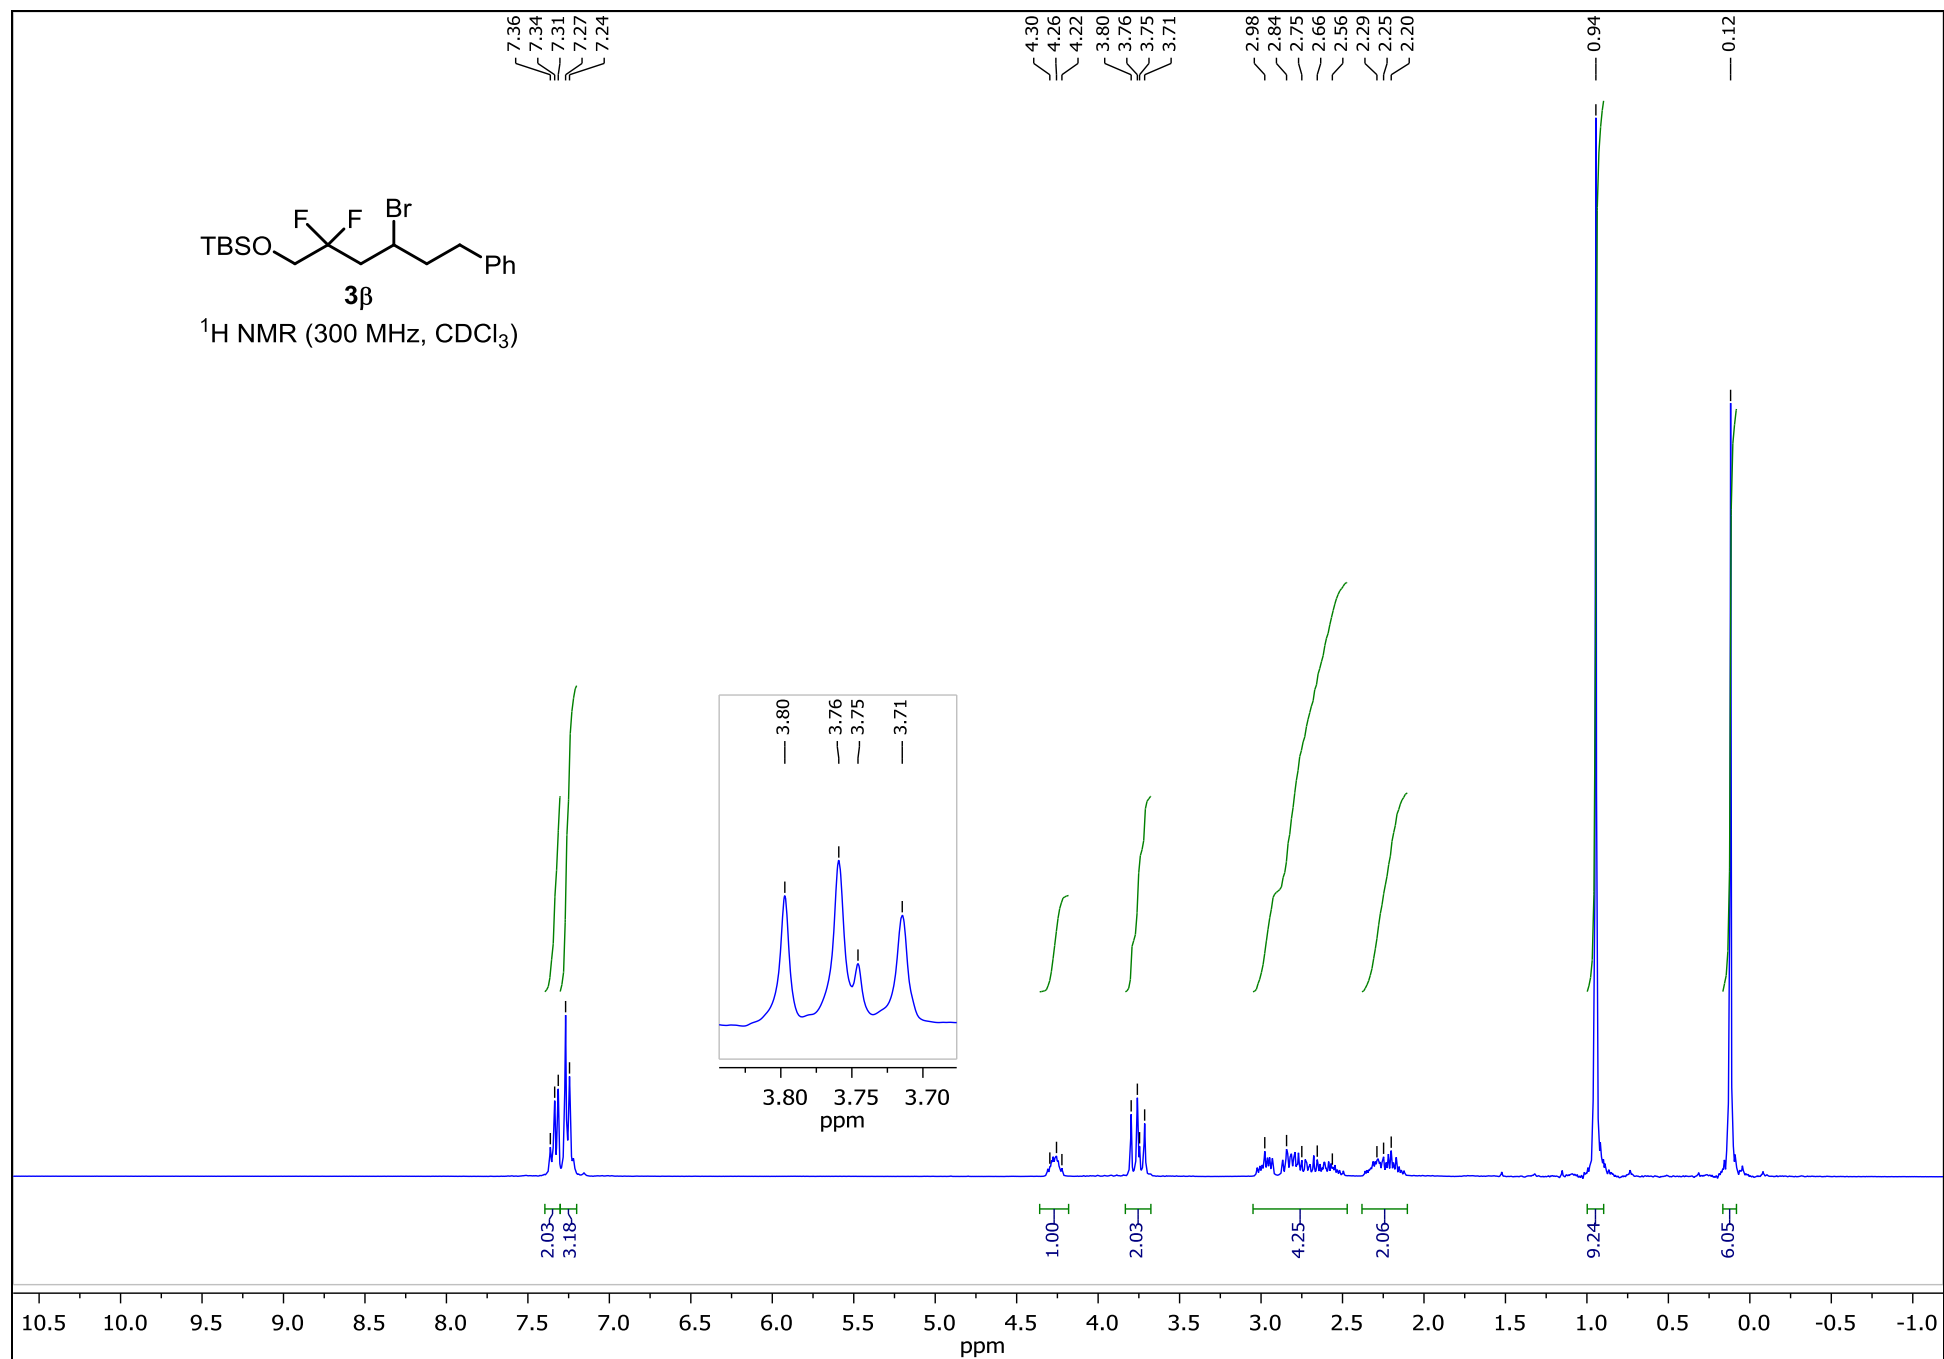

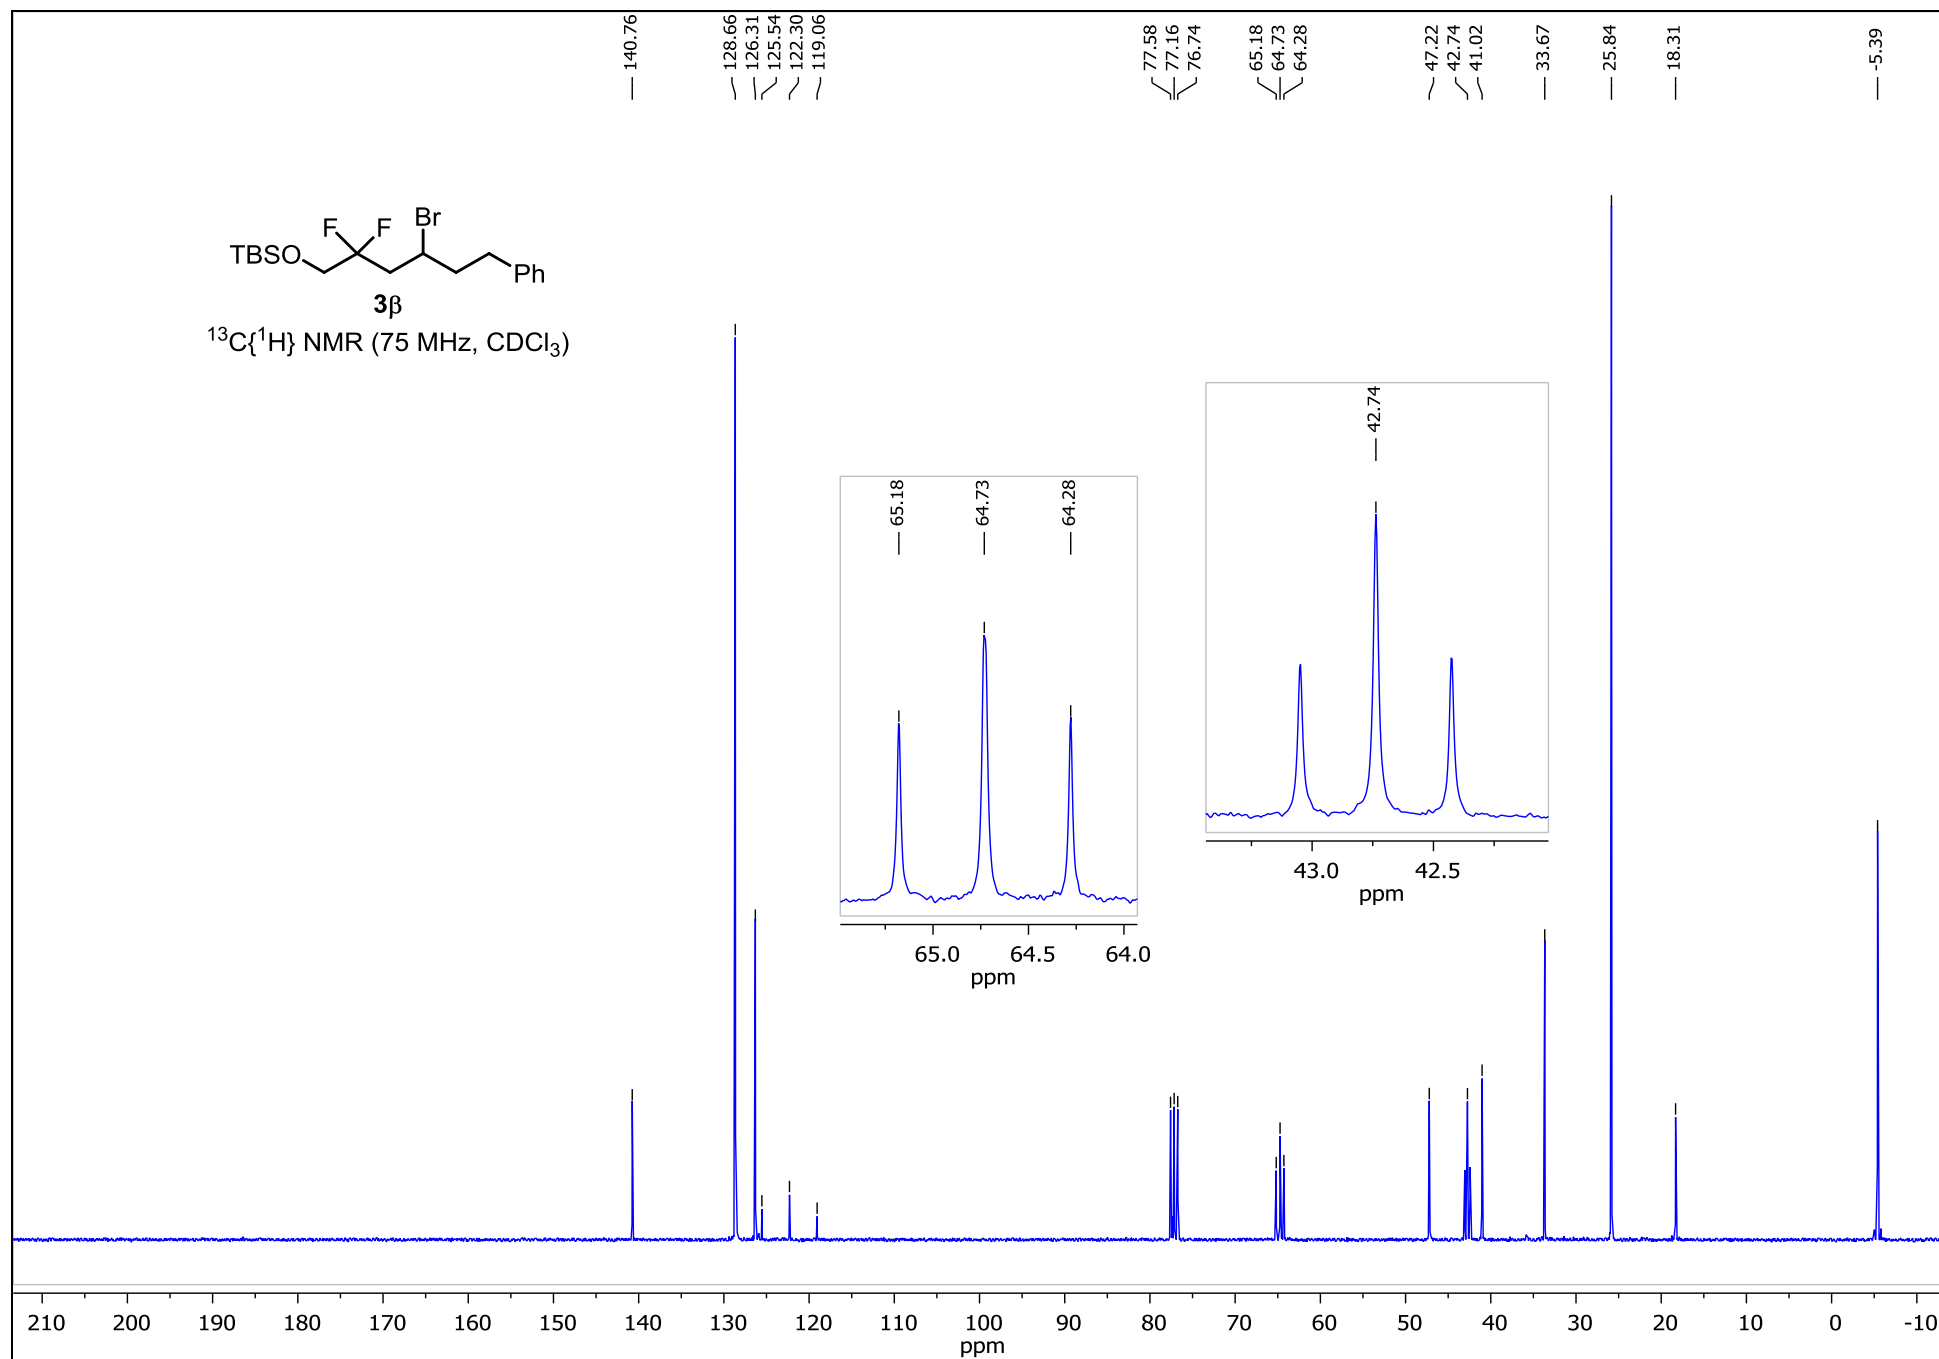

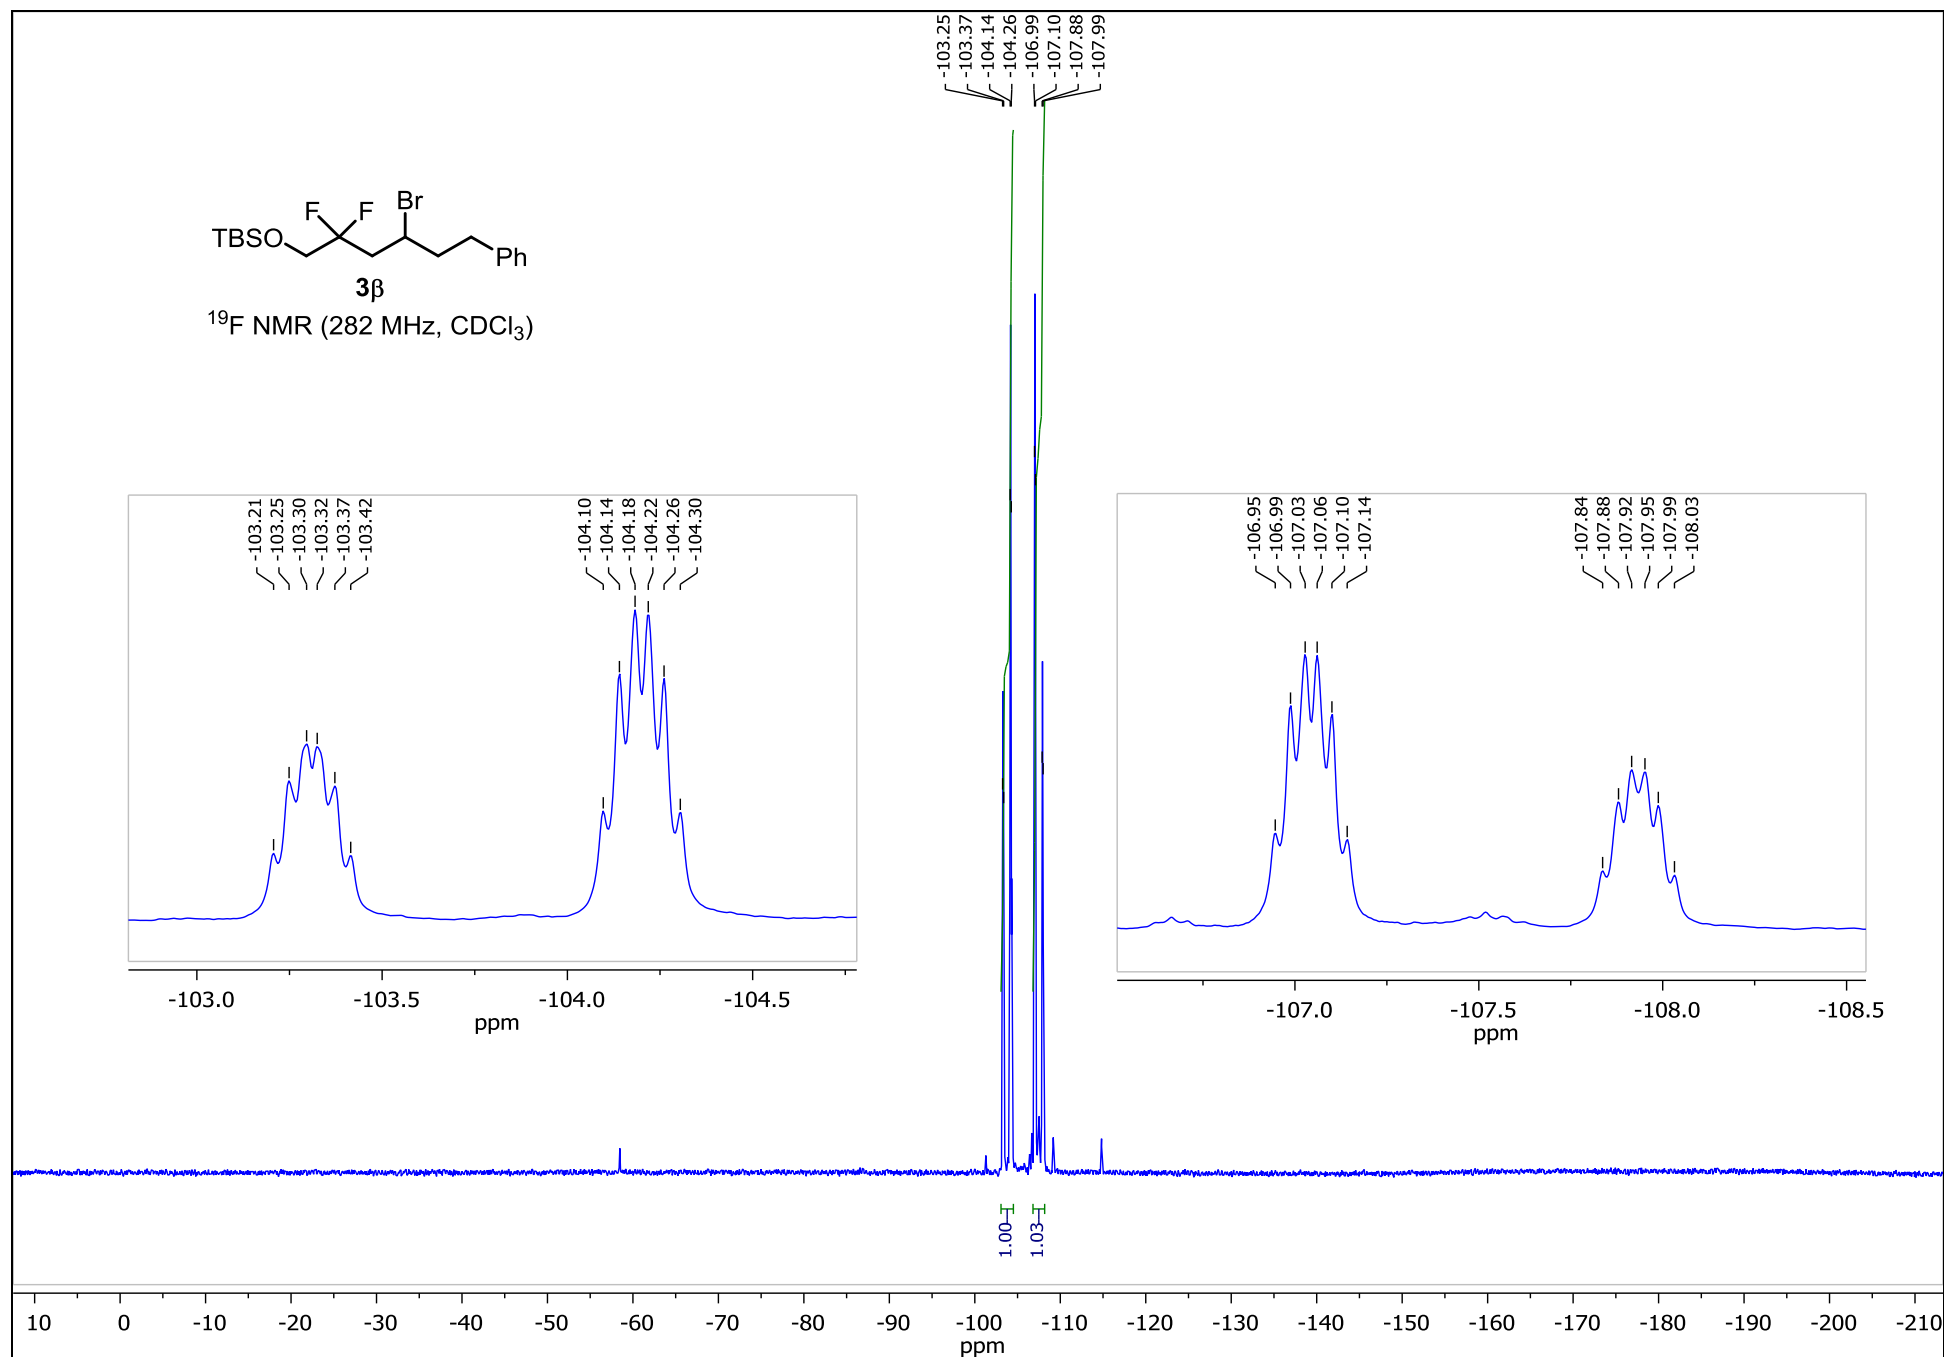

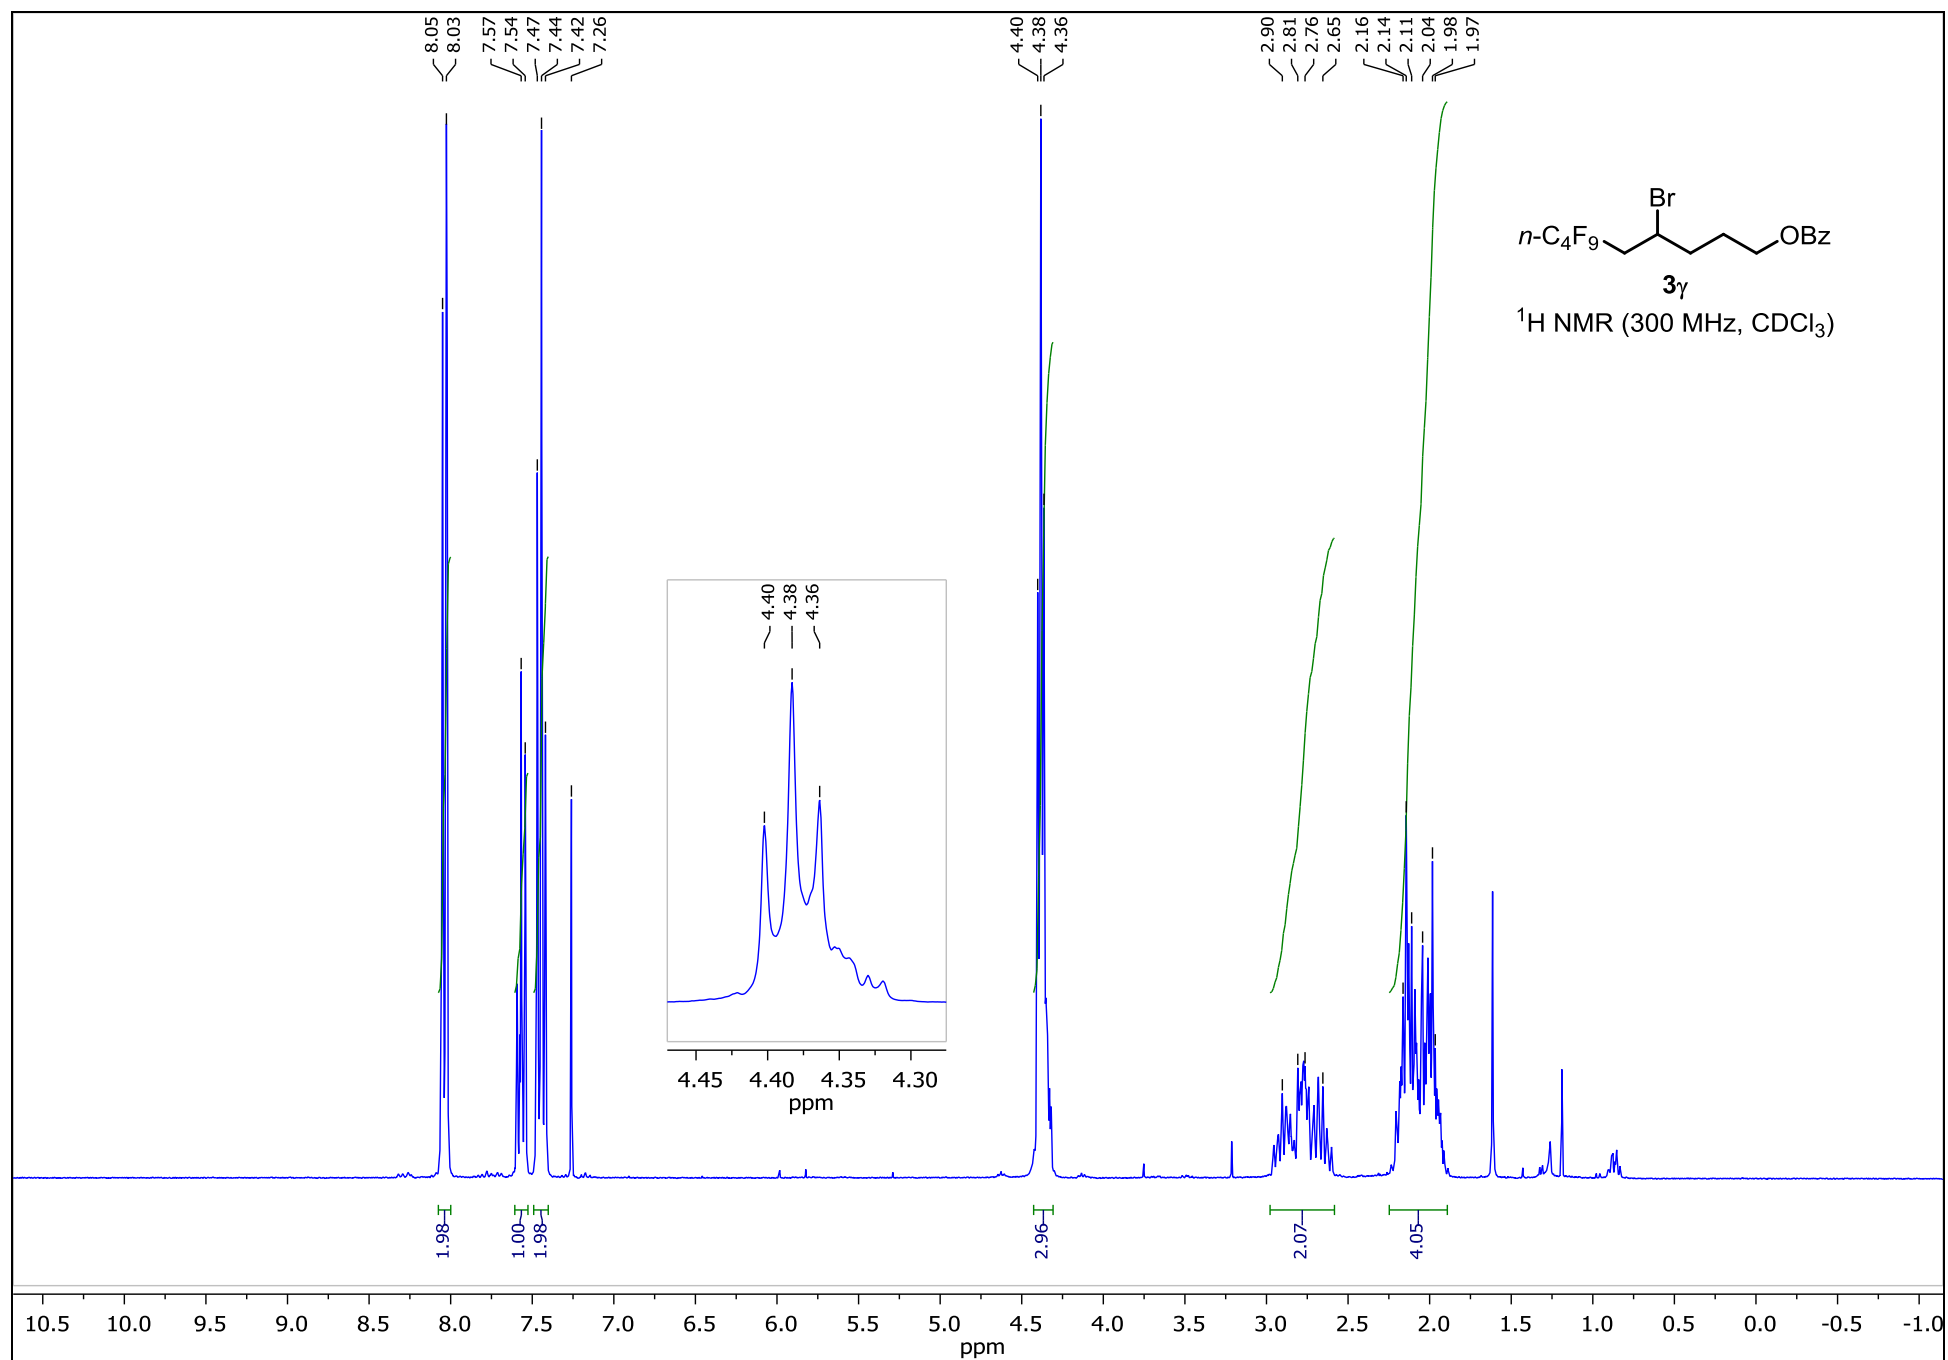

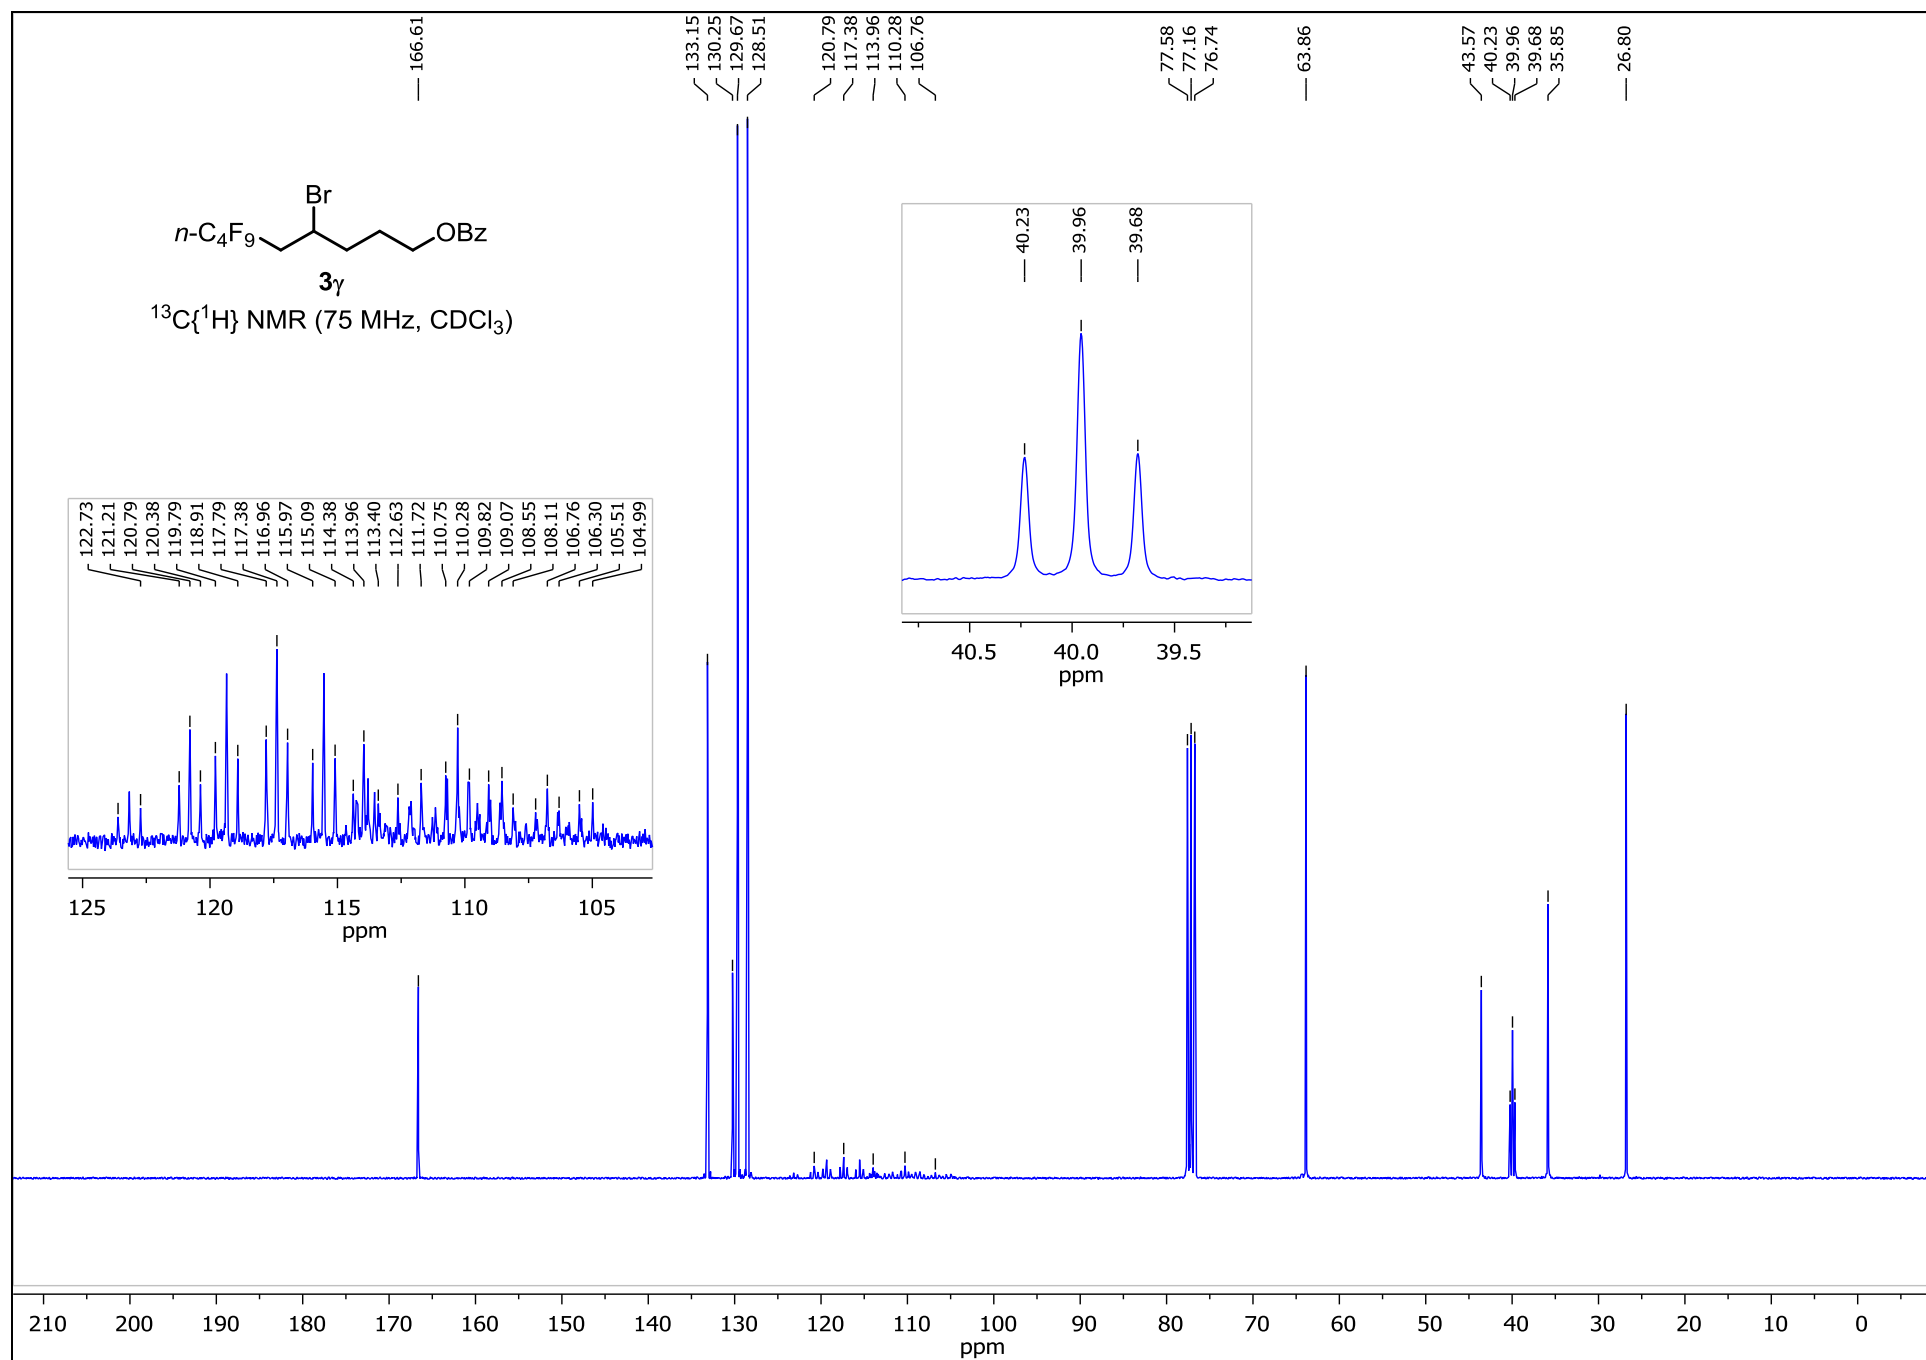

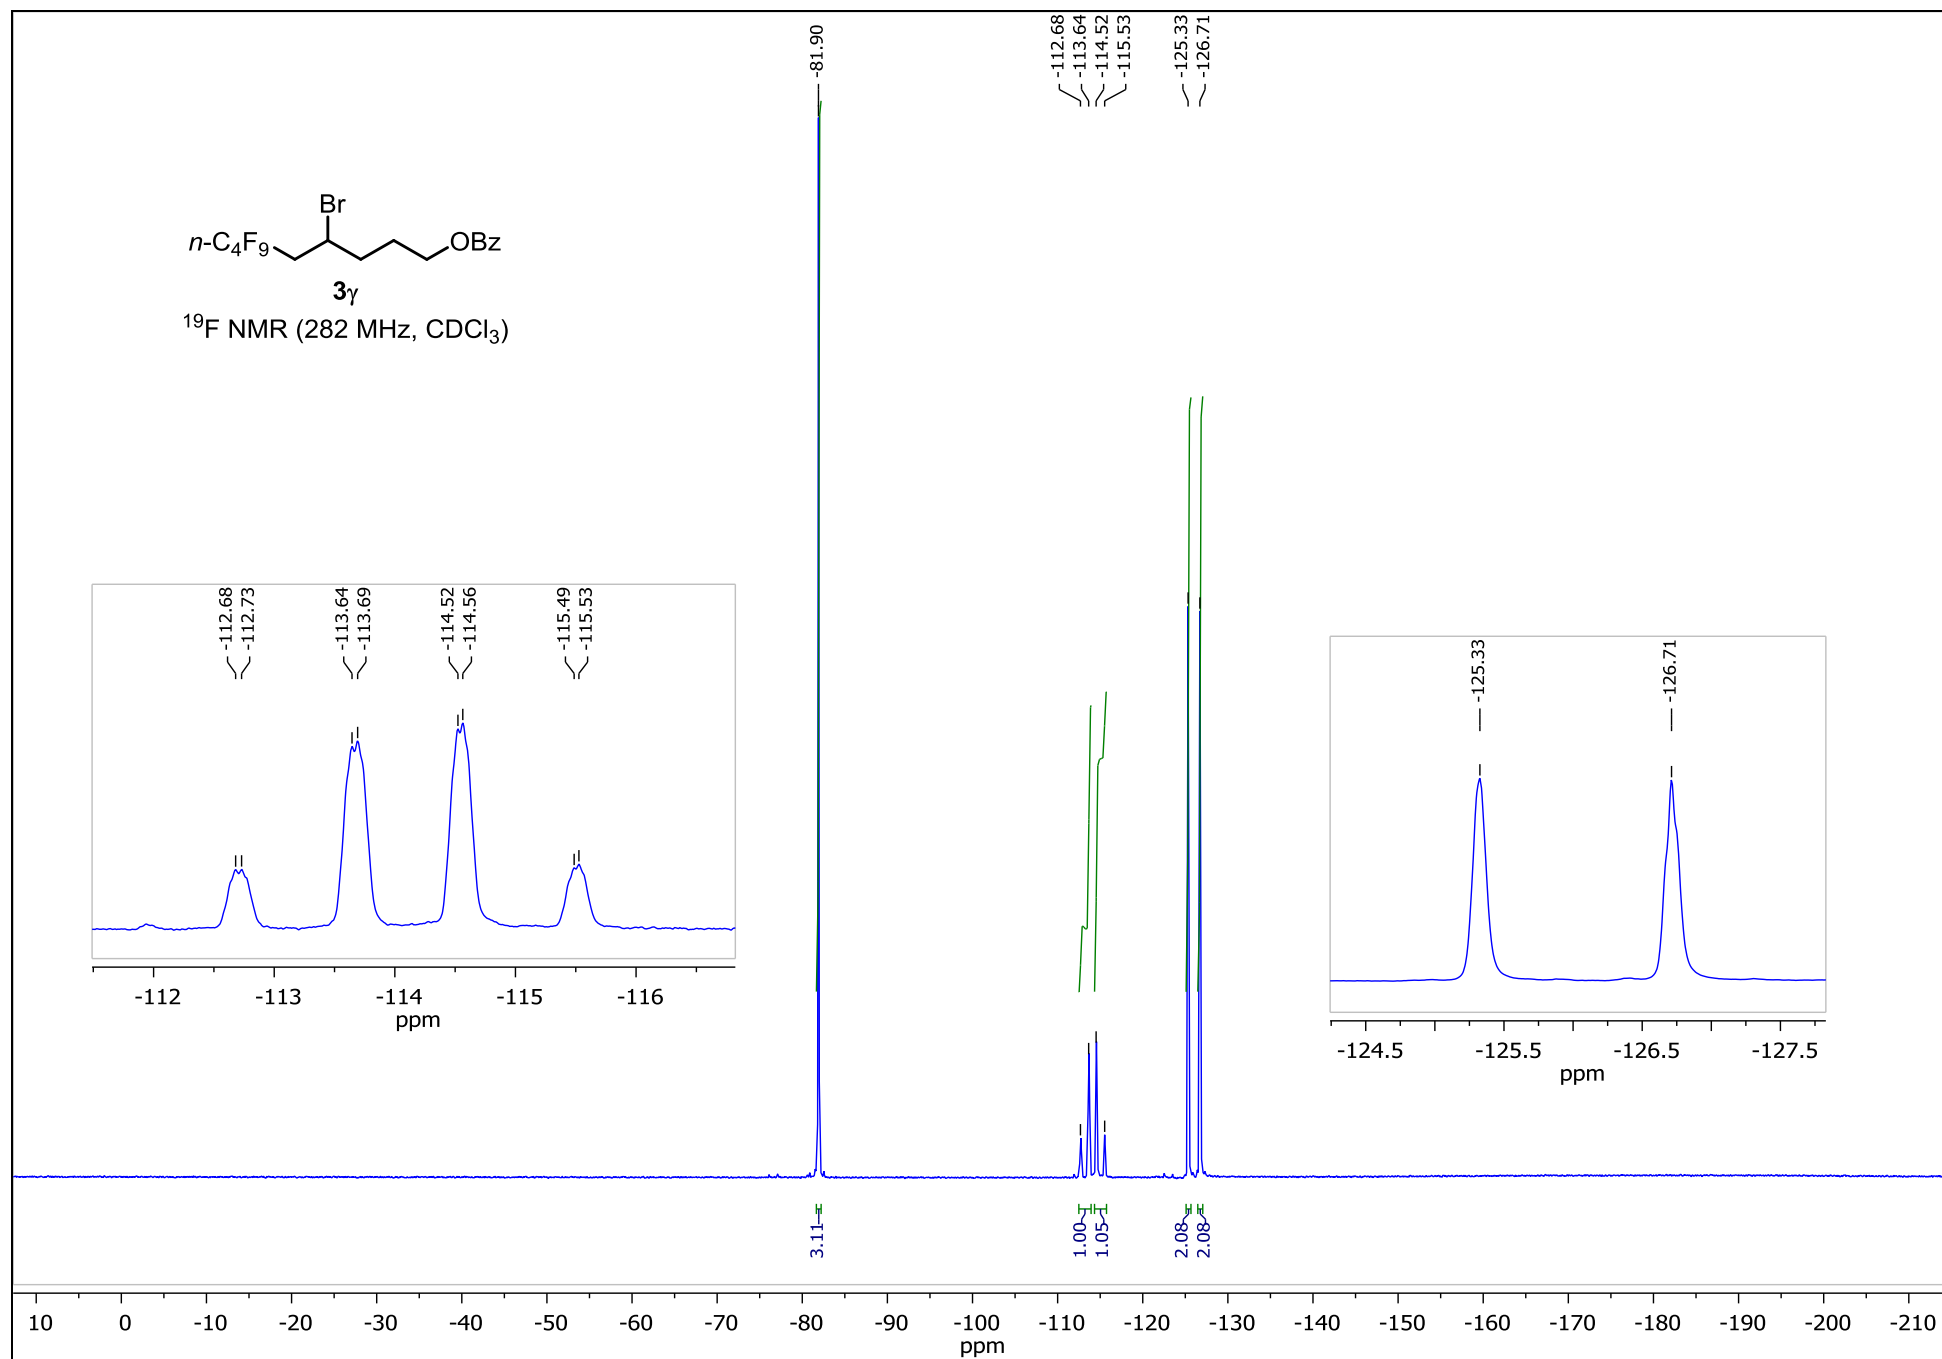

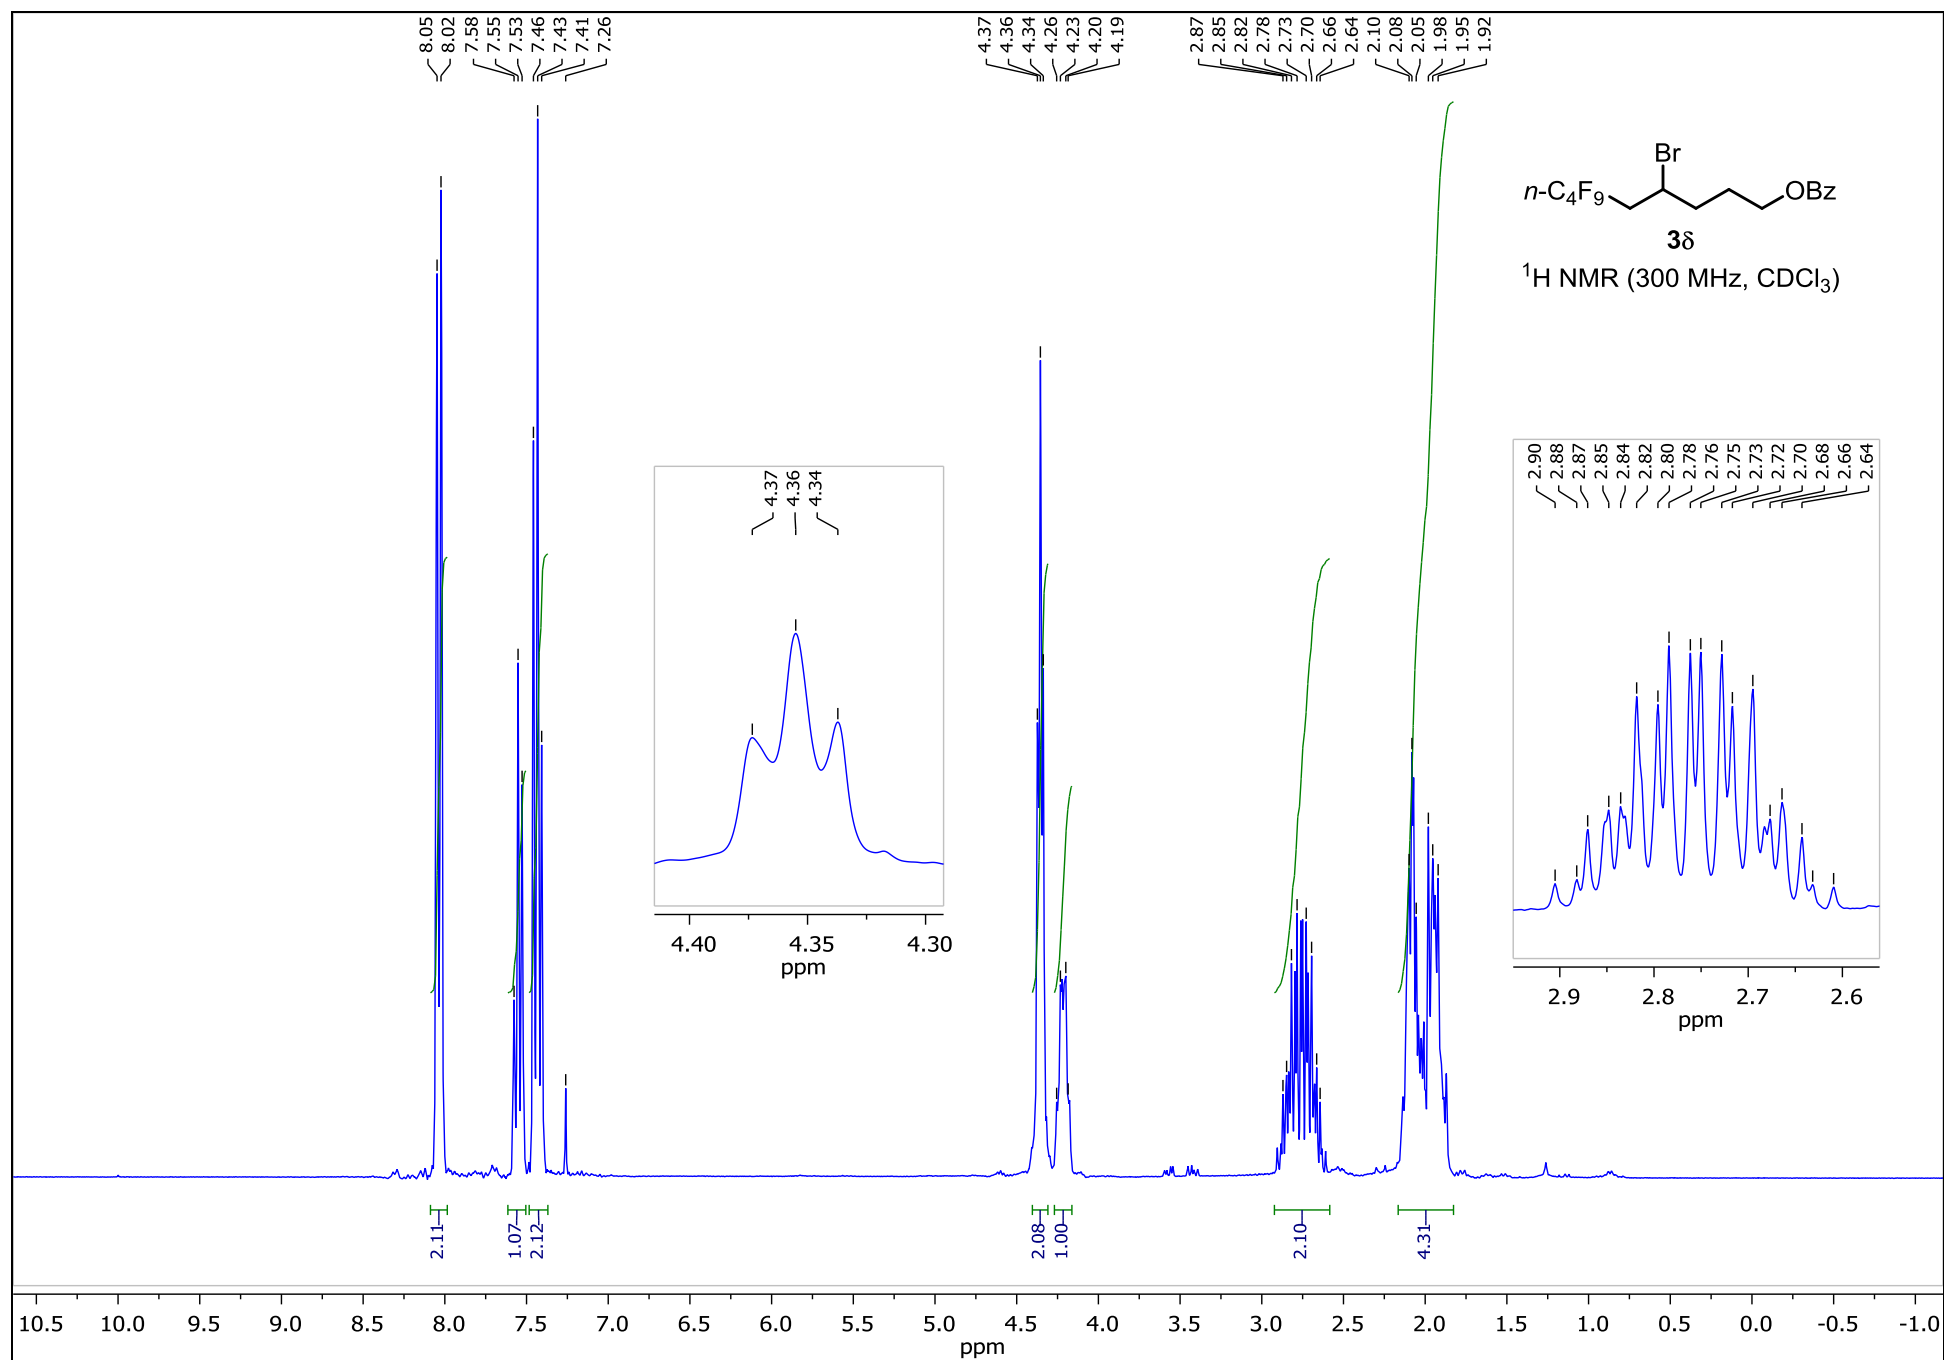



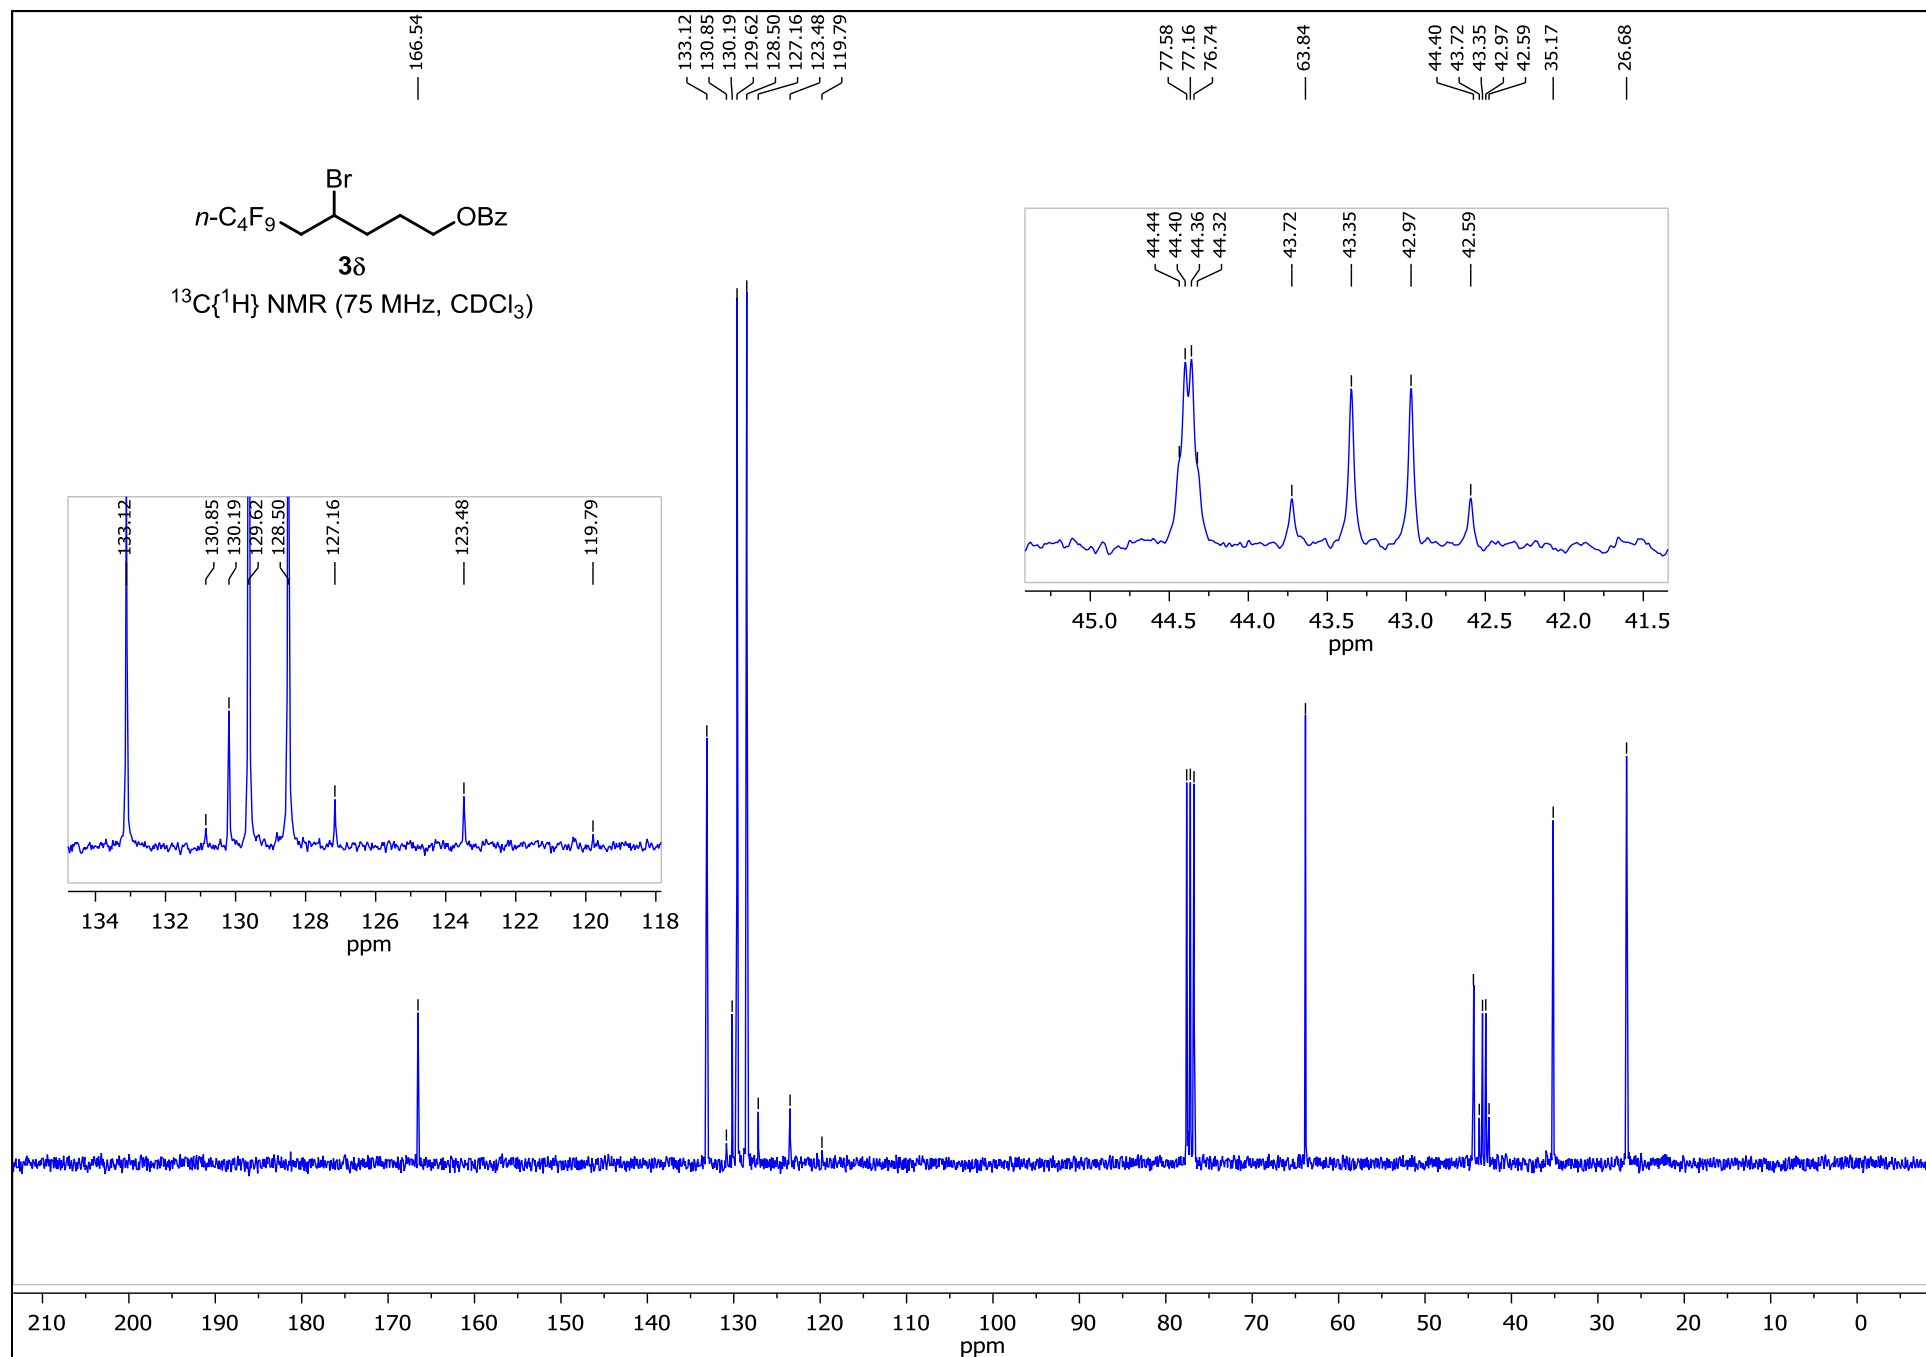

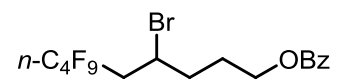

**3δ**

$^{19}\text{F}$  NMR (282 MHz,  $\text{CDCl}_3$ )

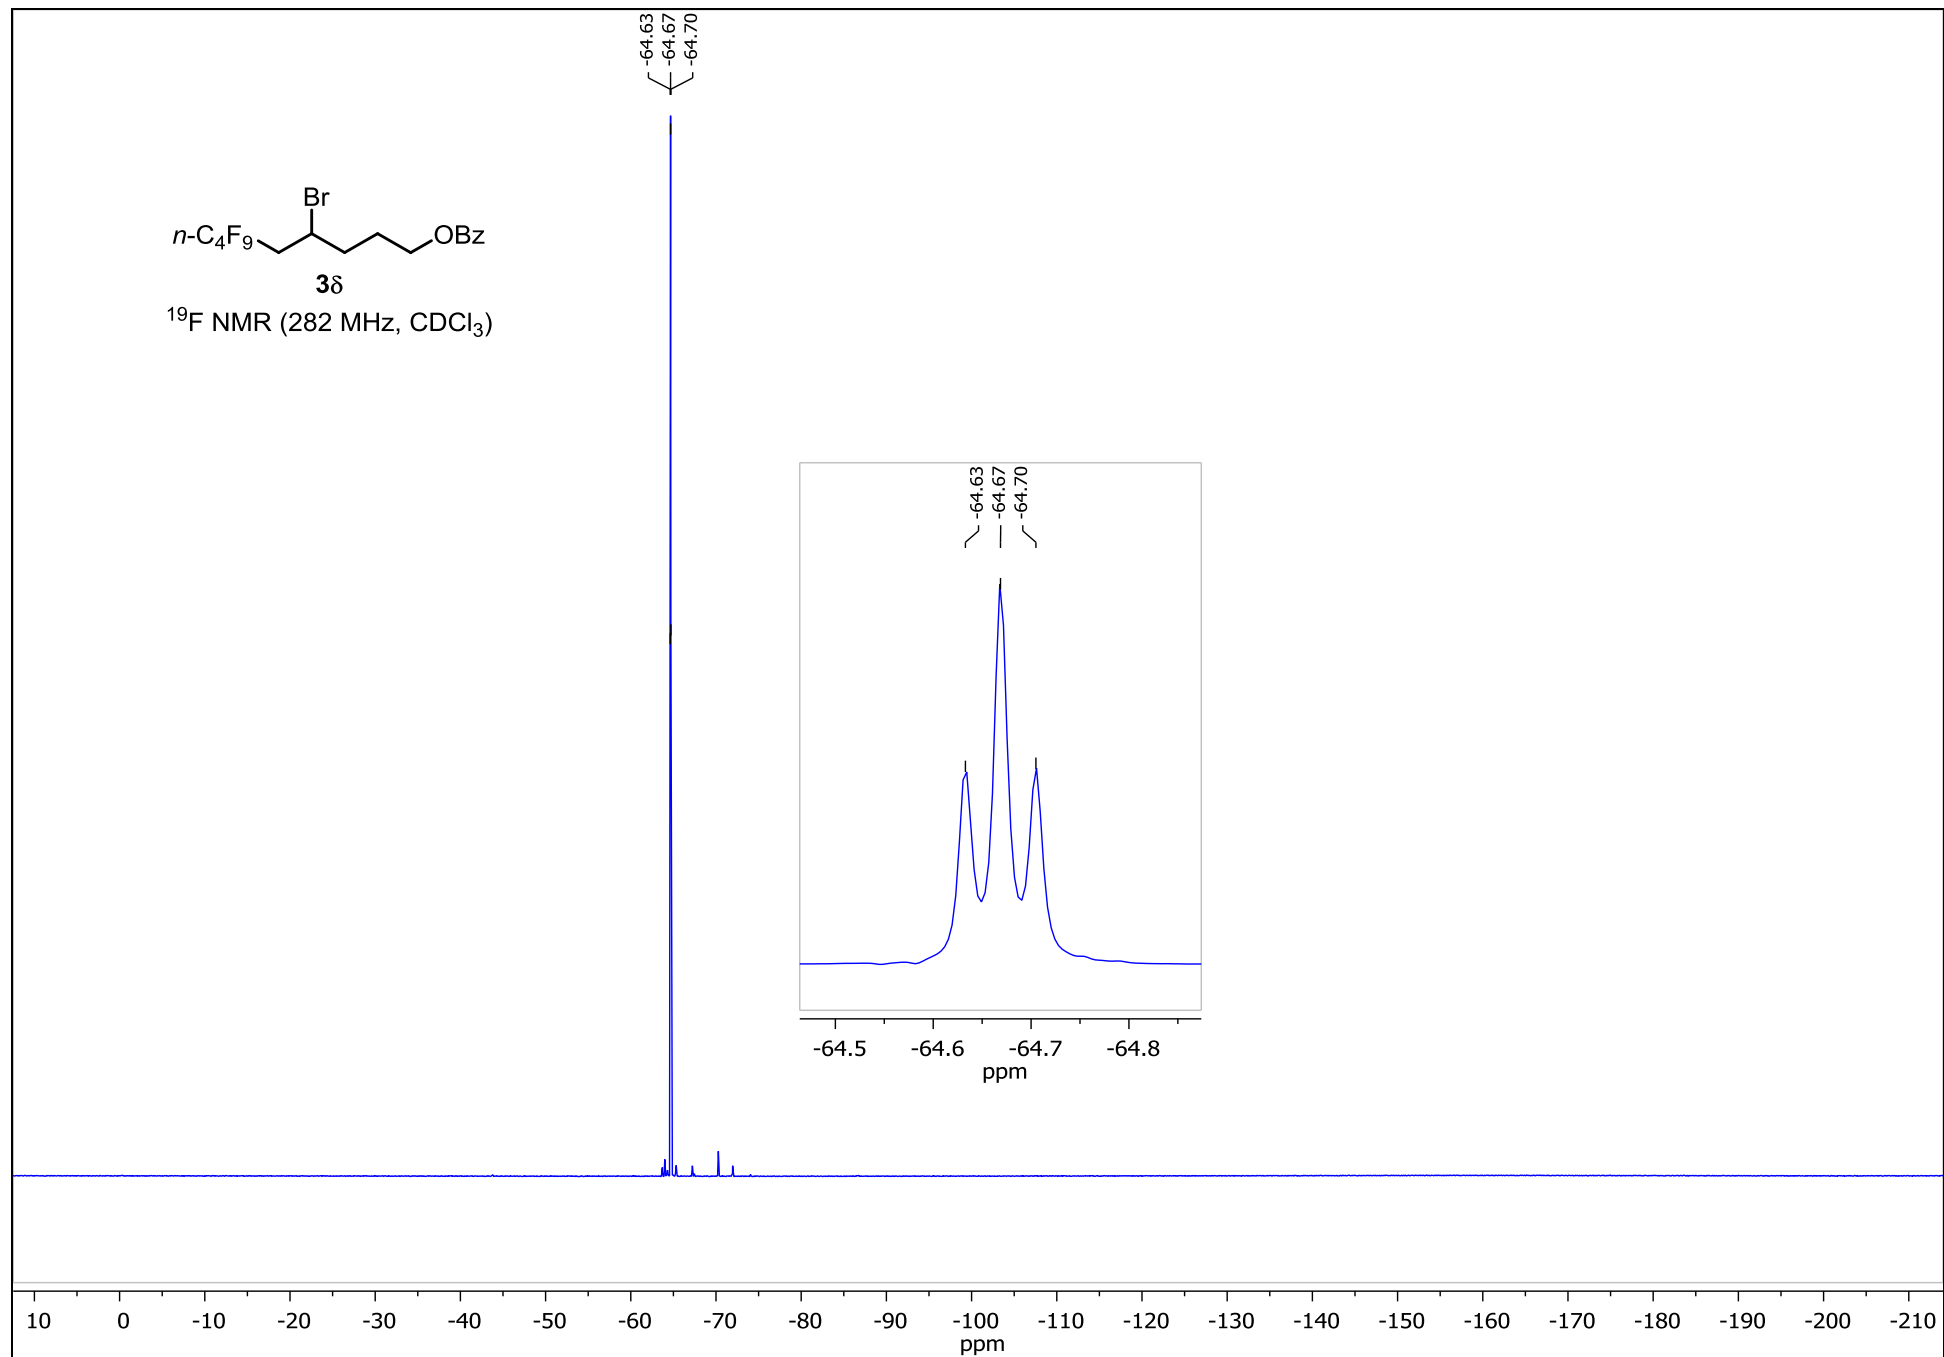

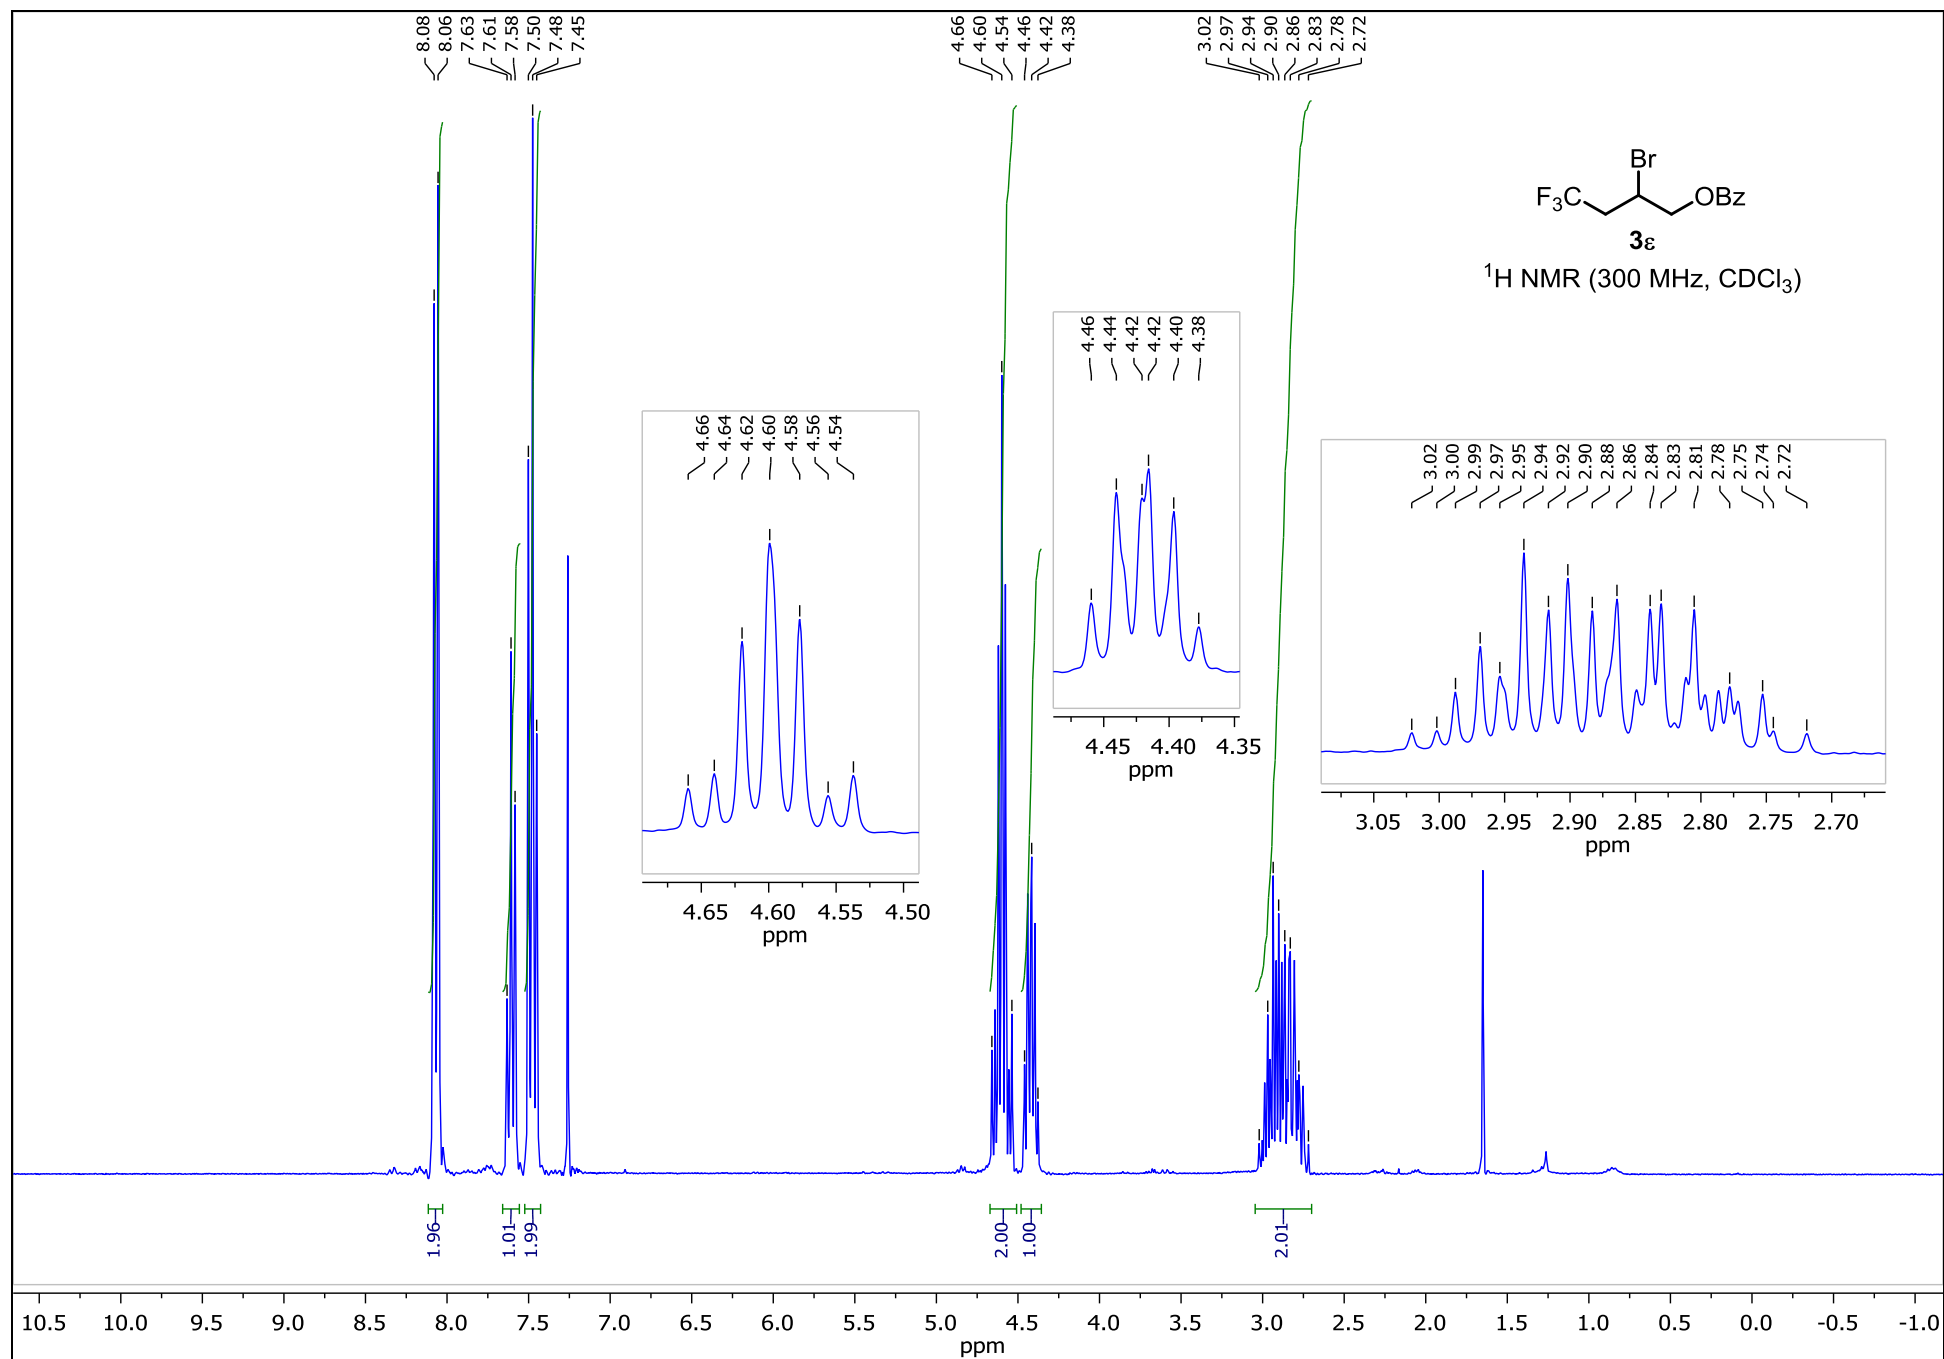

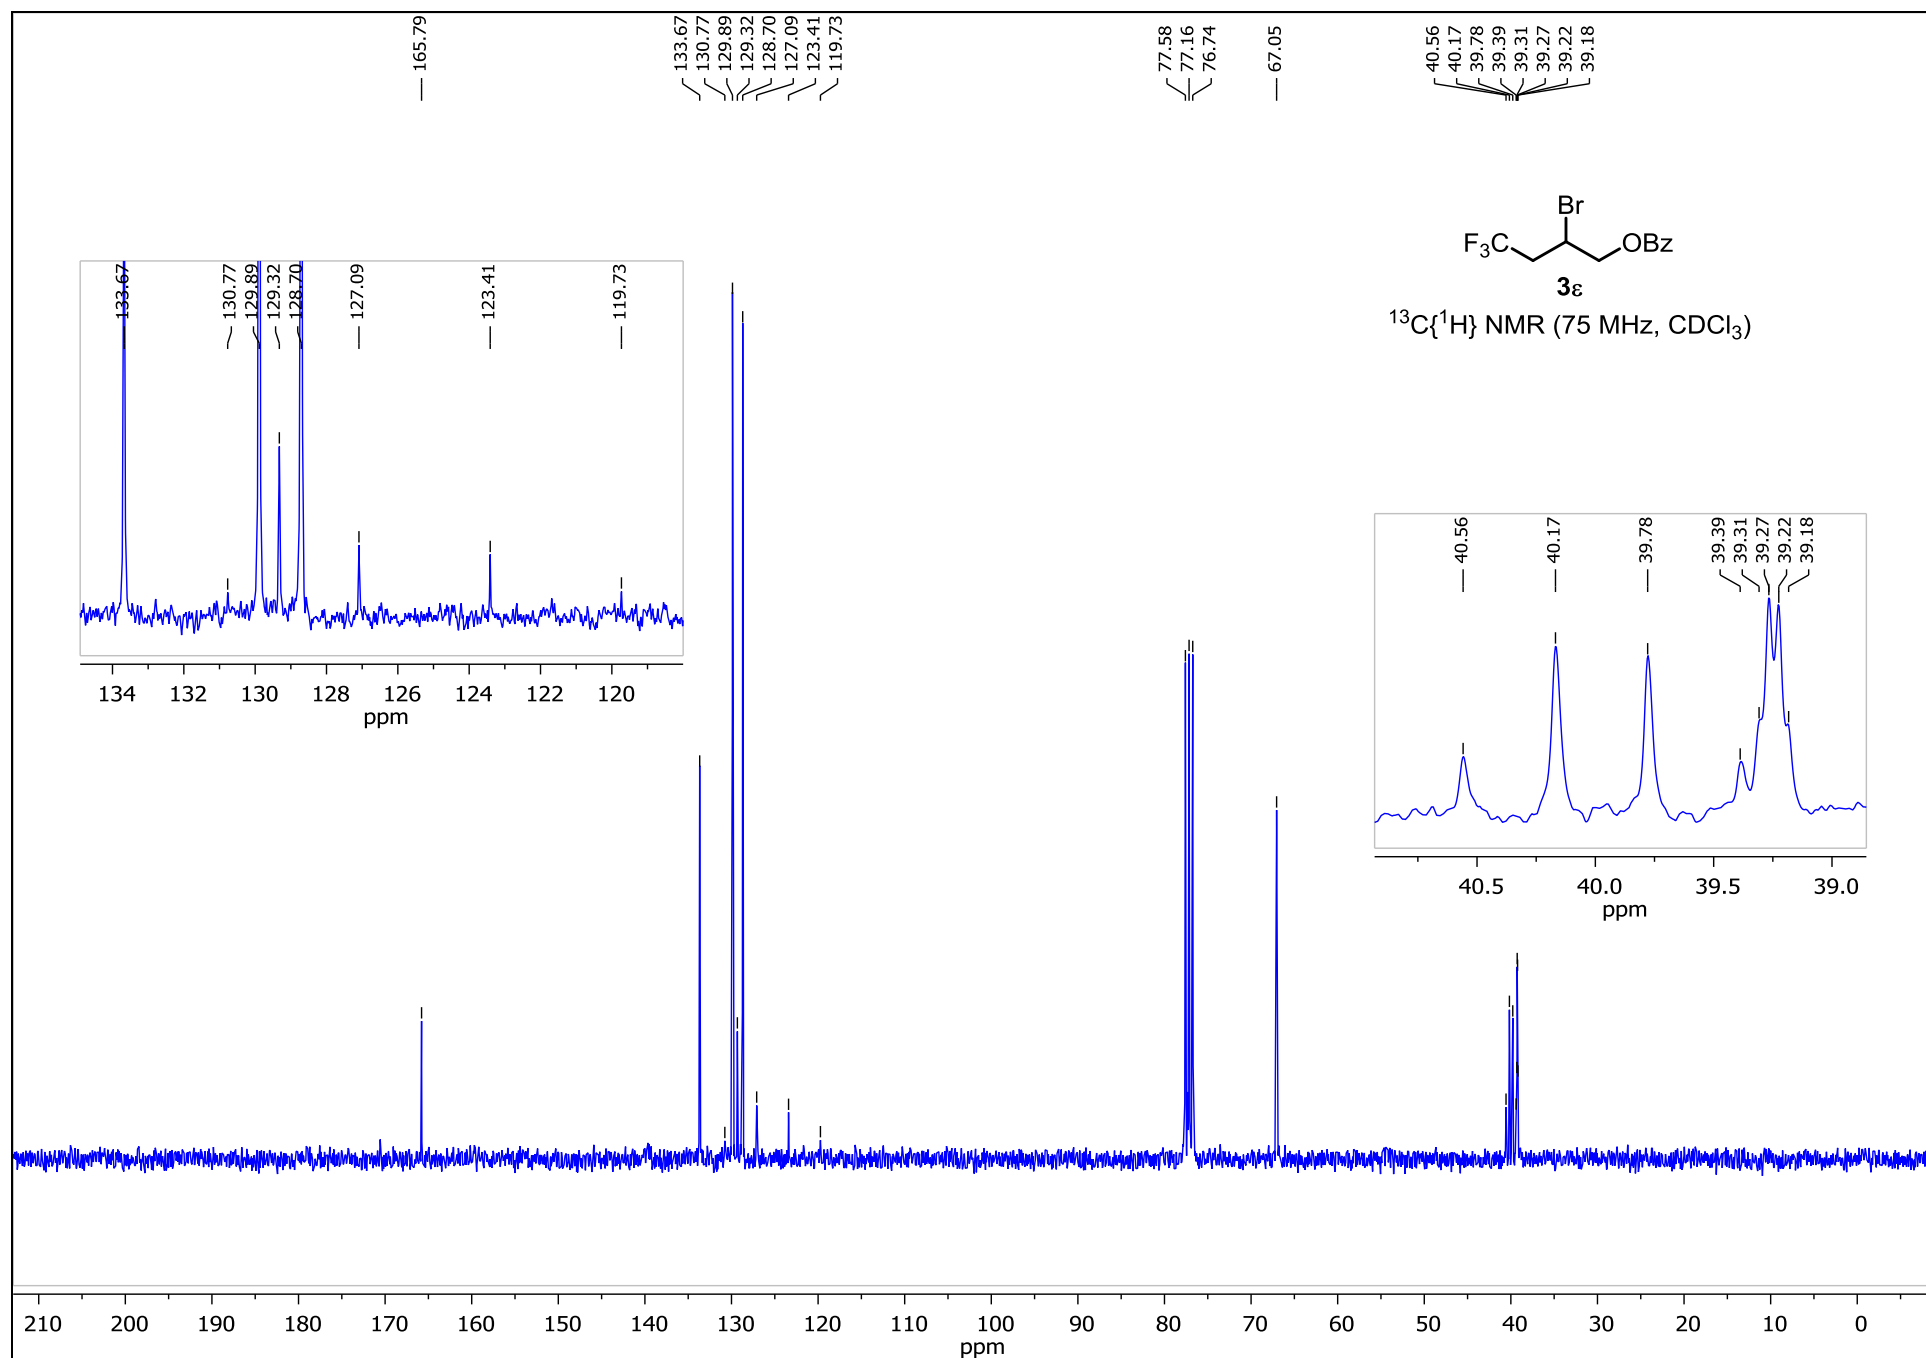

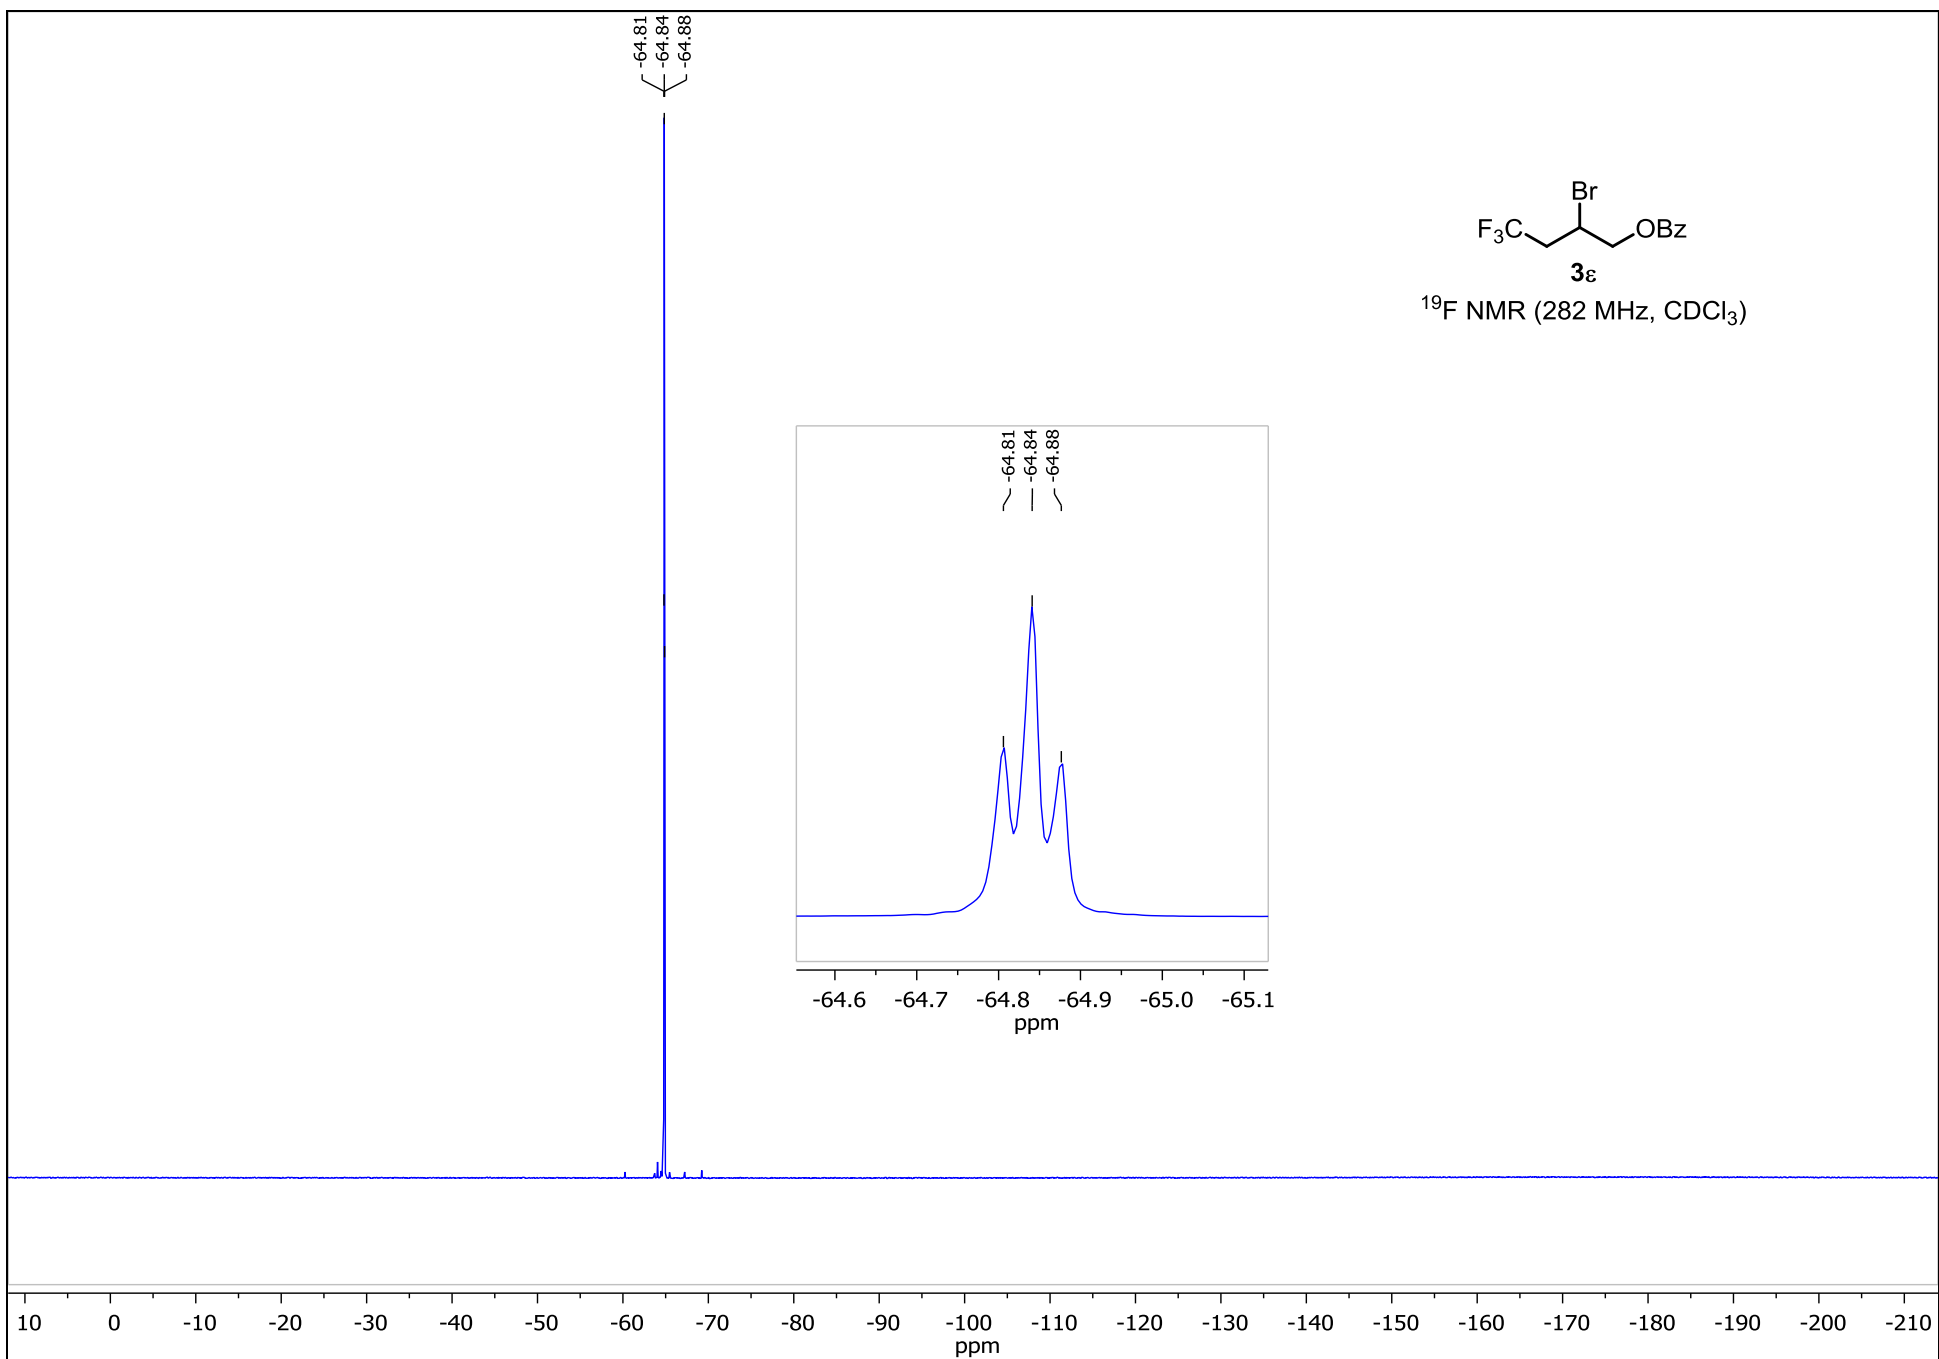

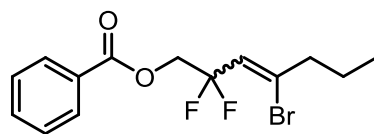**5-major** $^1\text{H}$  NMR {300 MHz,  $\text{CDCl}_3$ }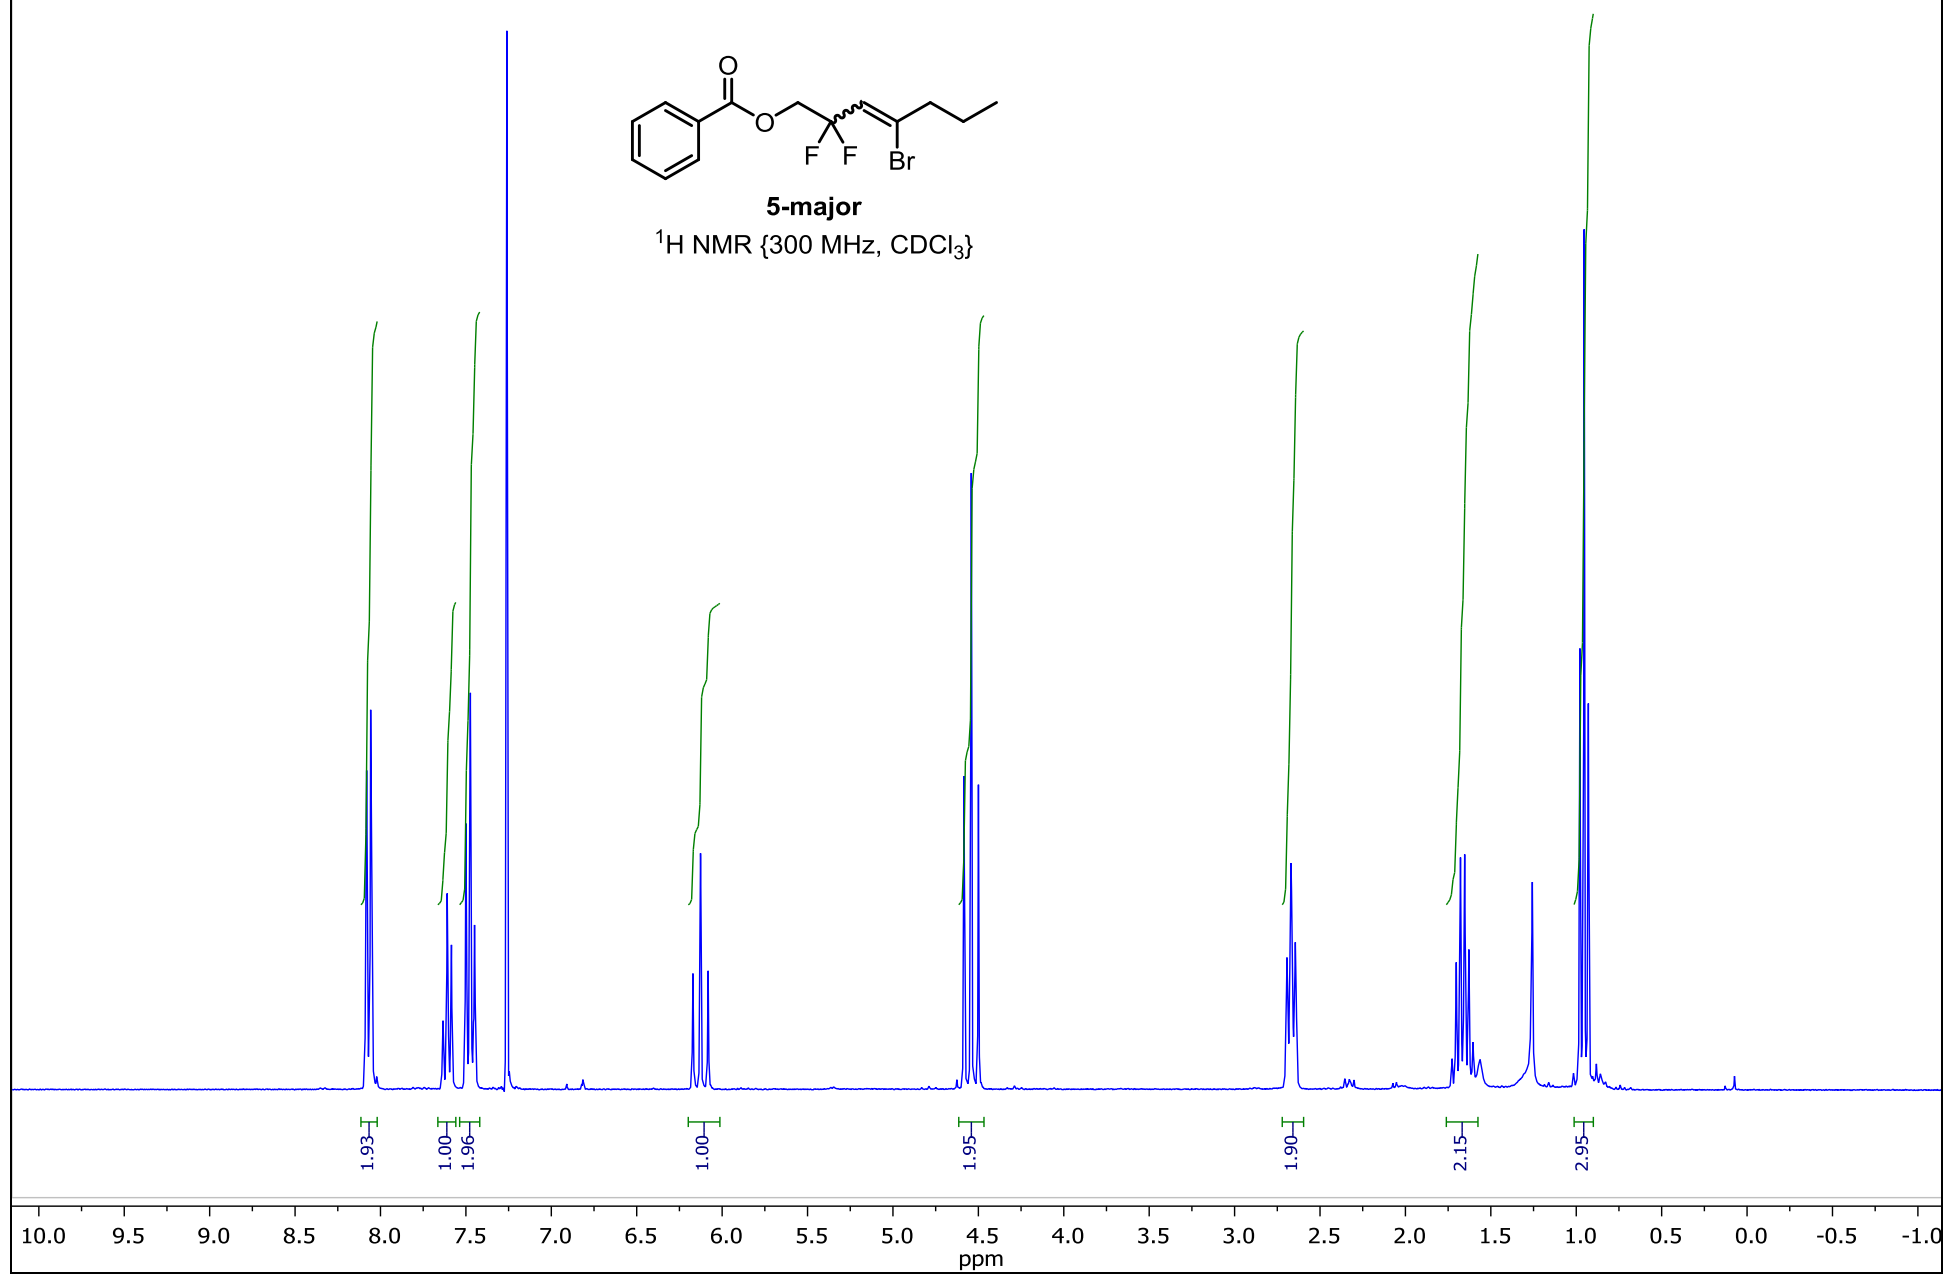

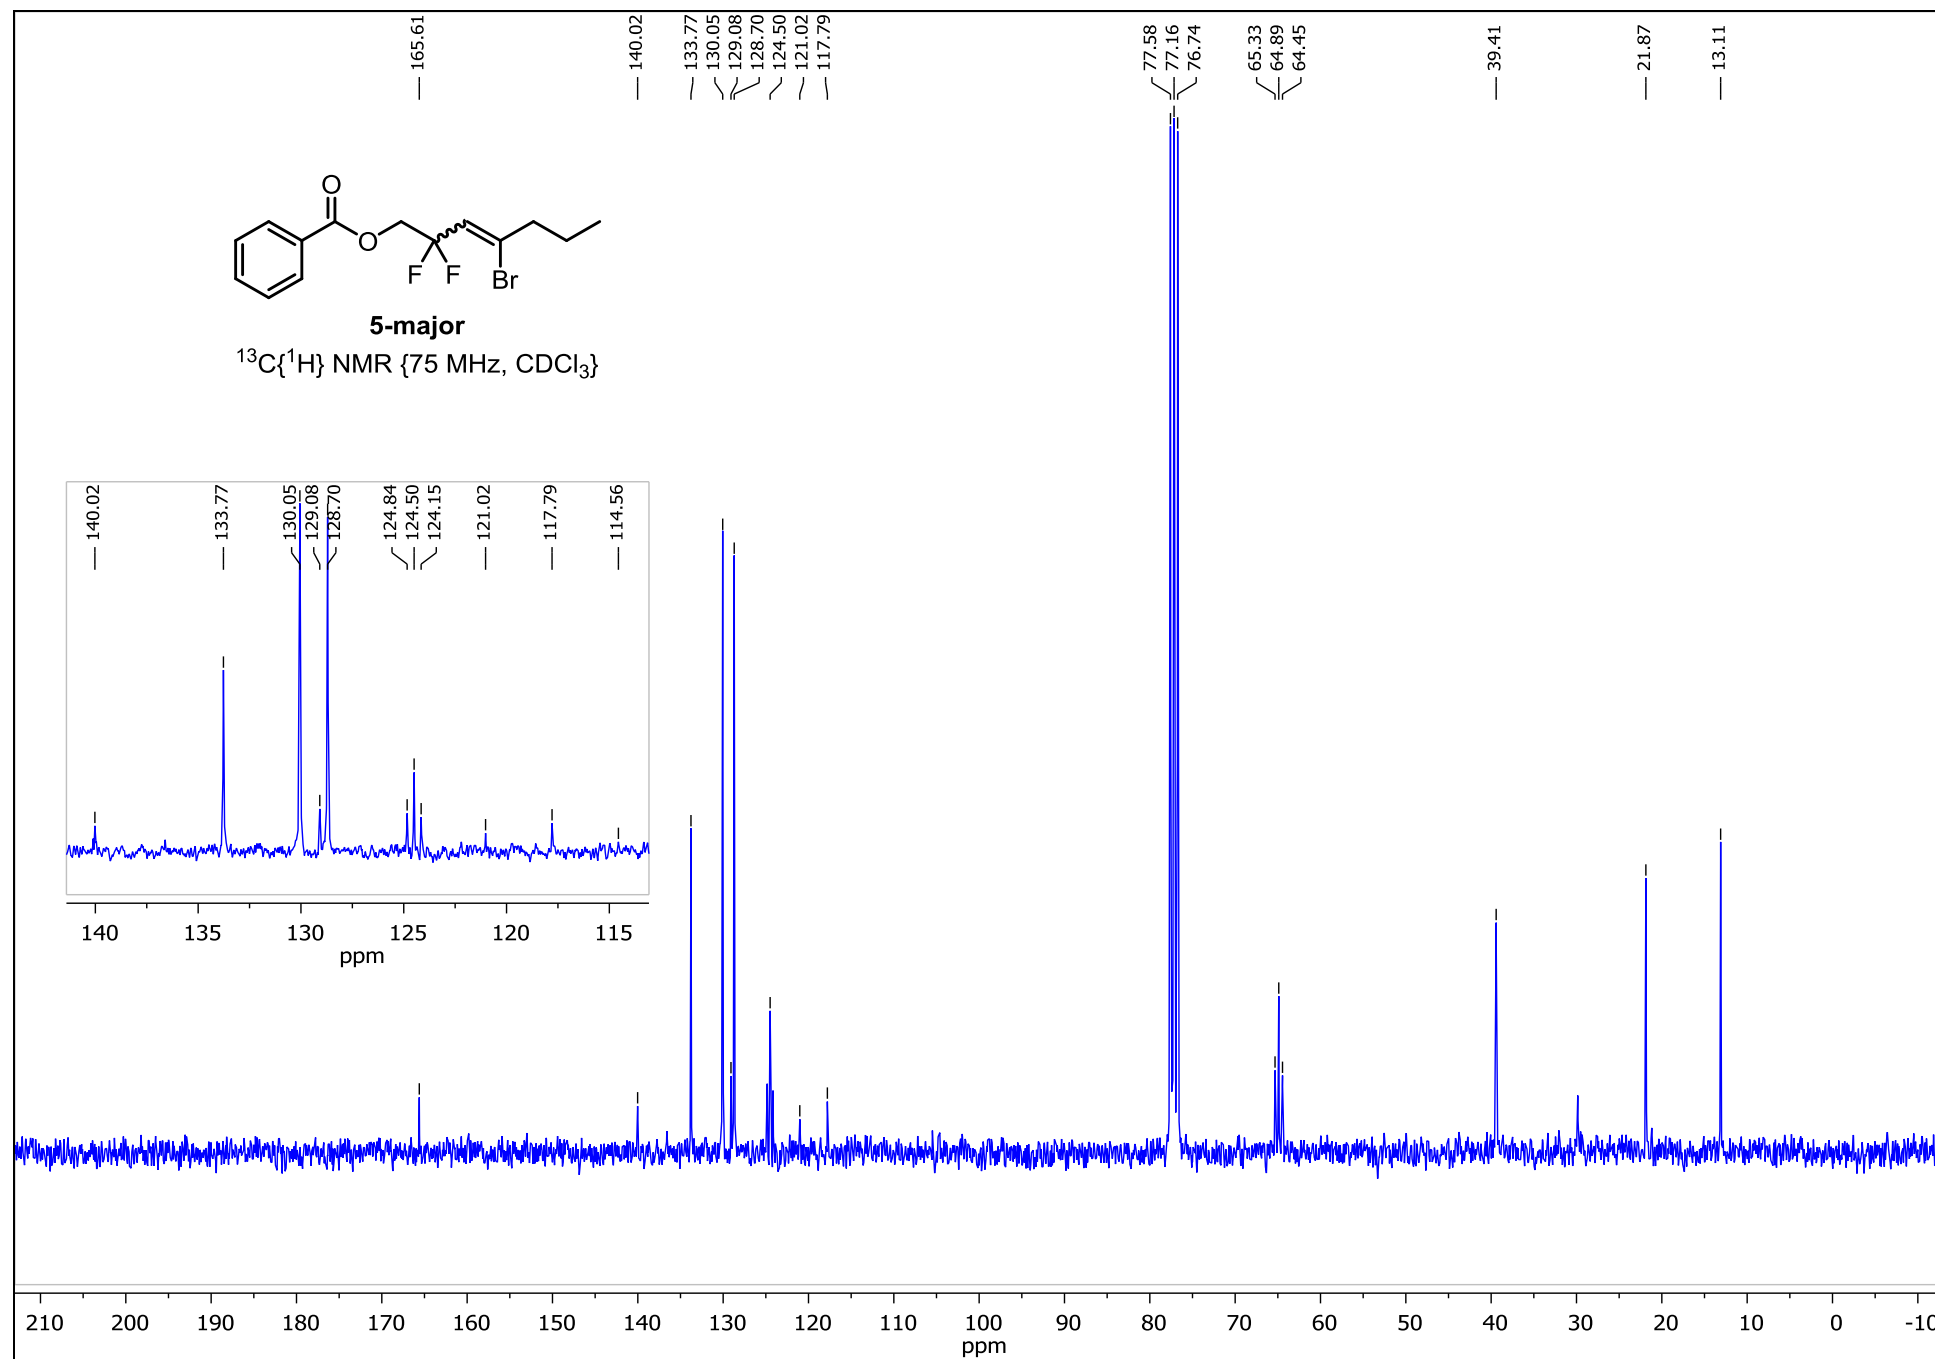

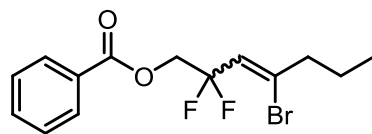**5-major**<sup>19</sup>F NMR {282 MHz, CDCl<sub>3</sub>}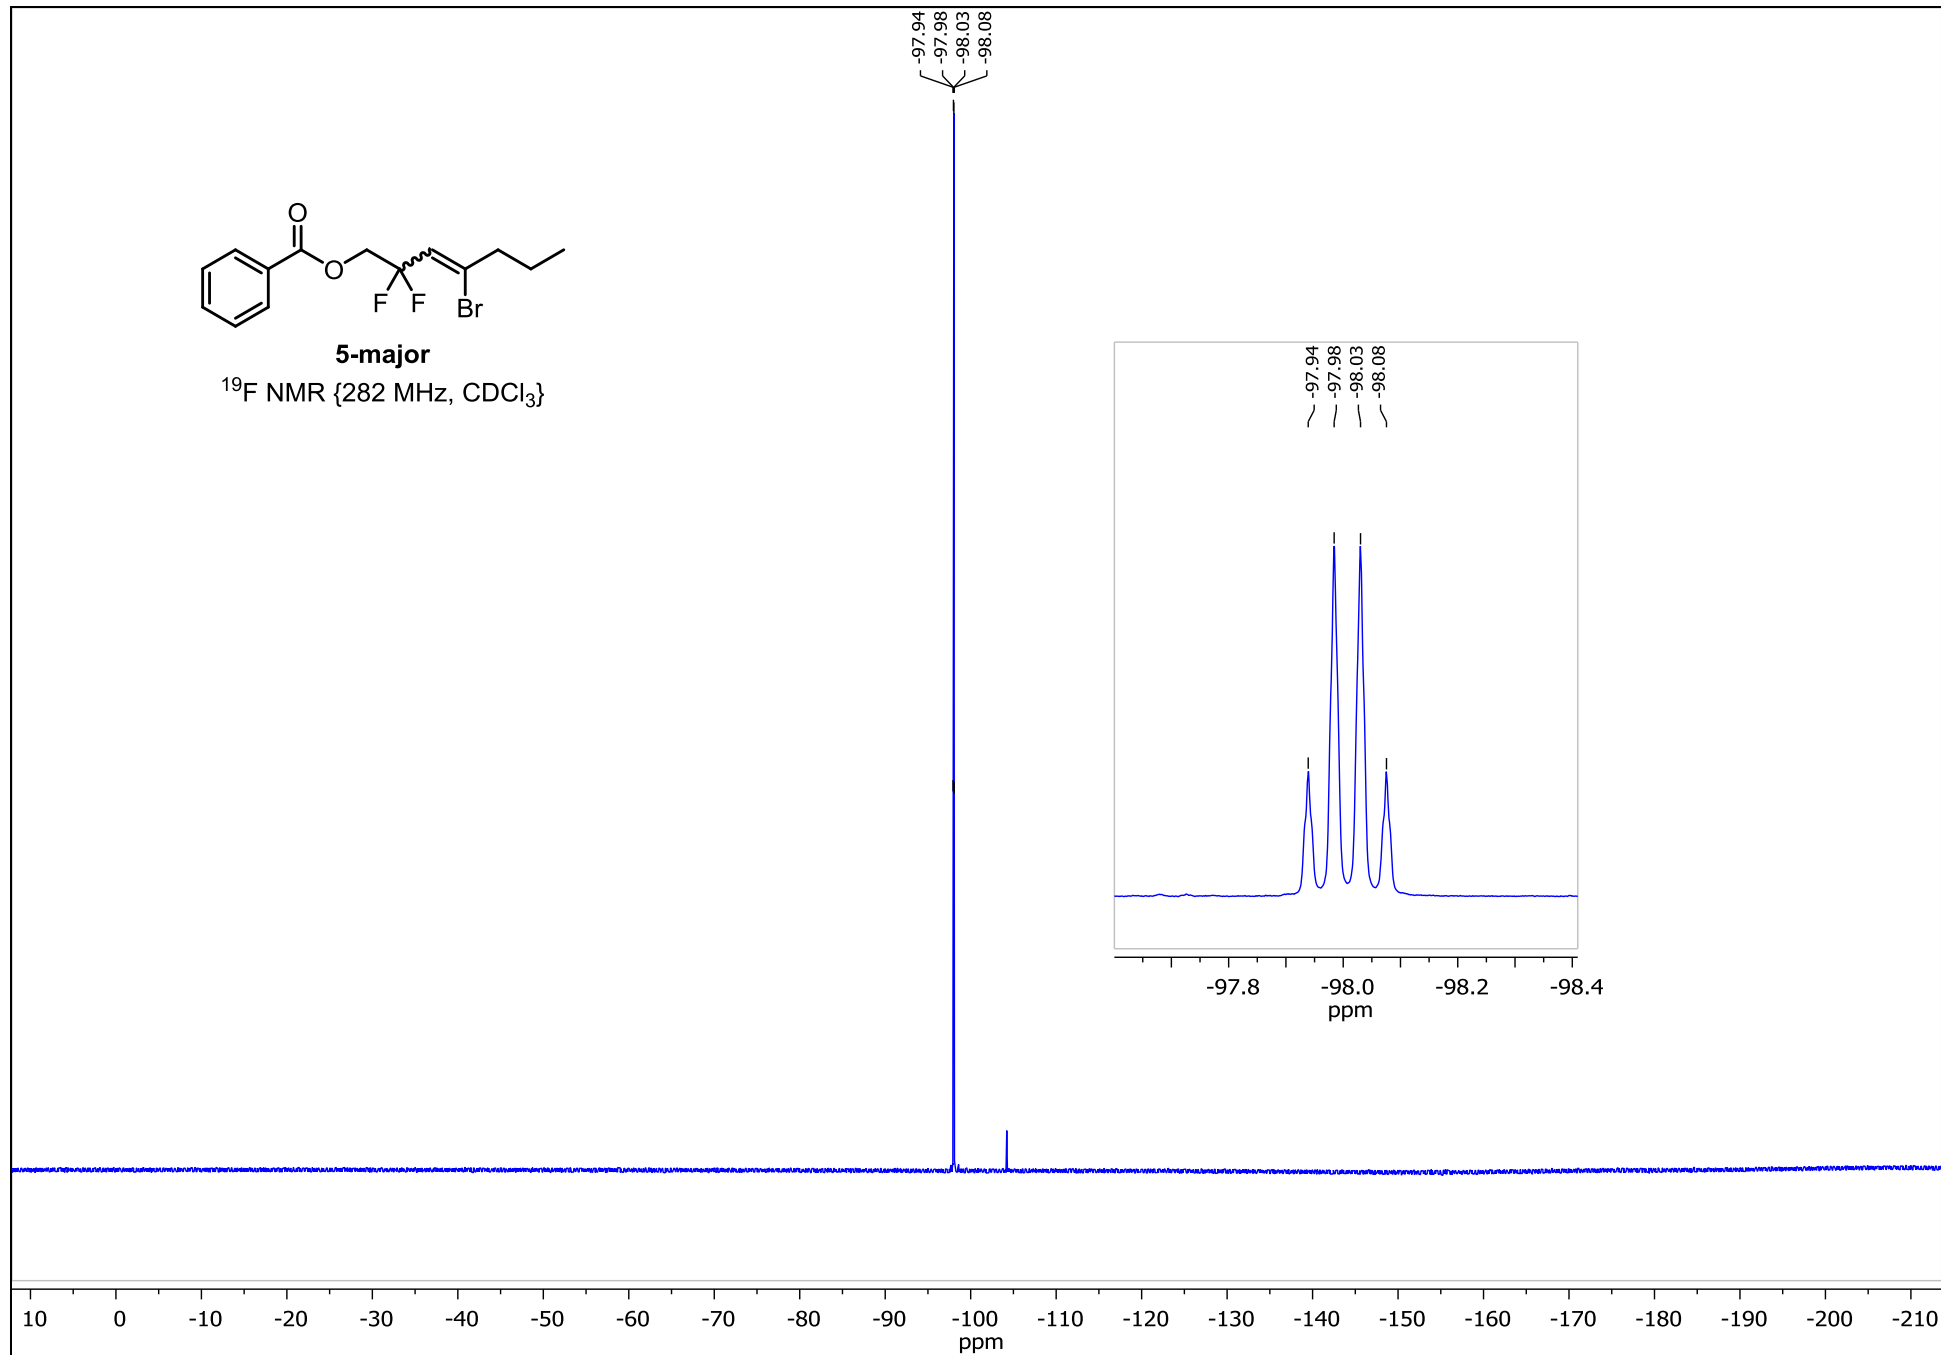



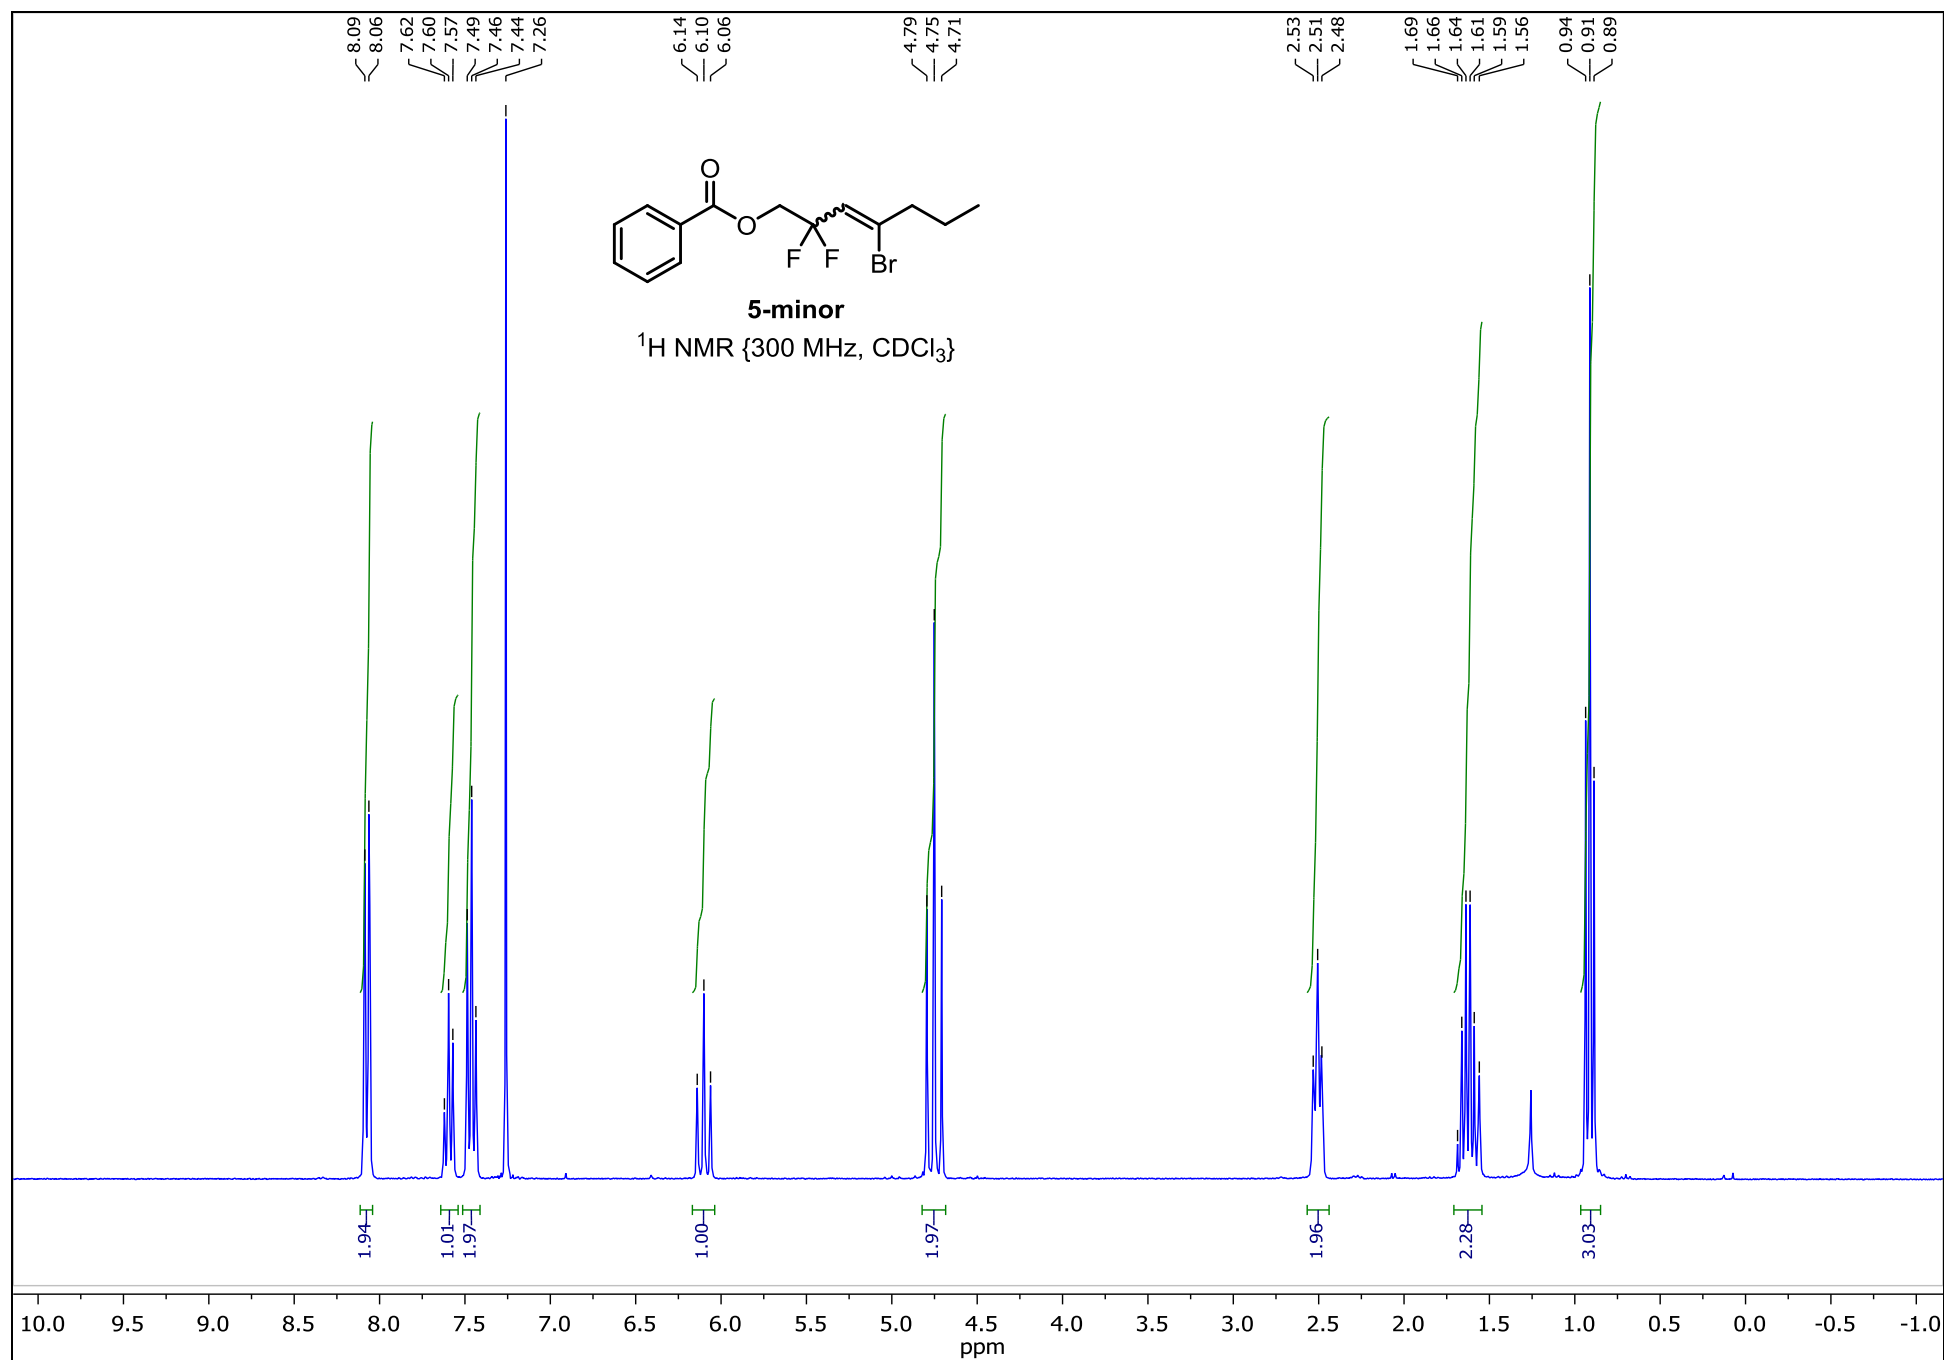

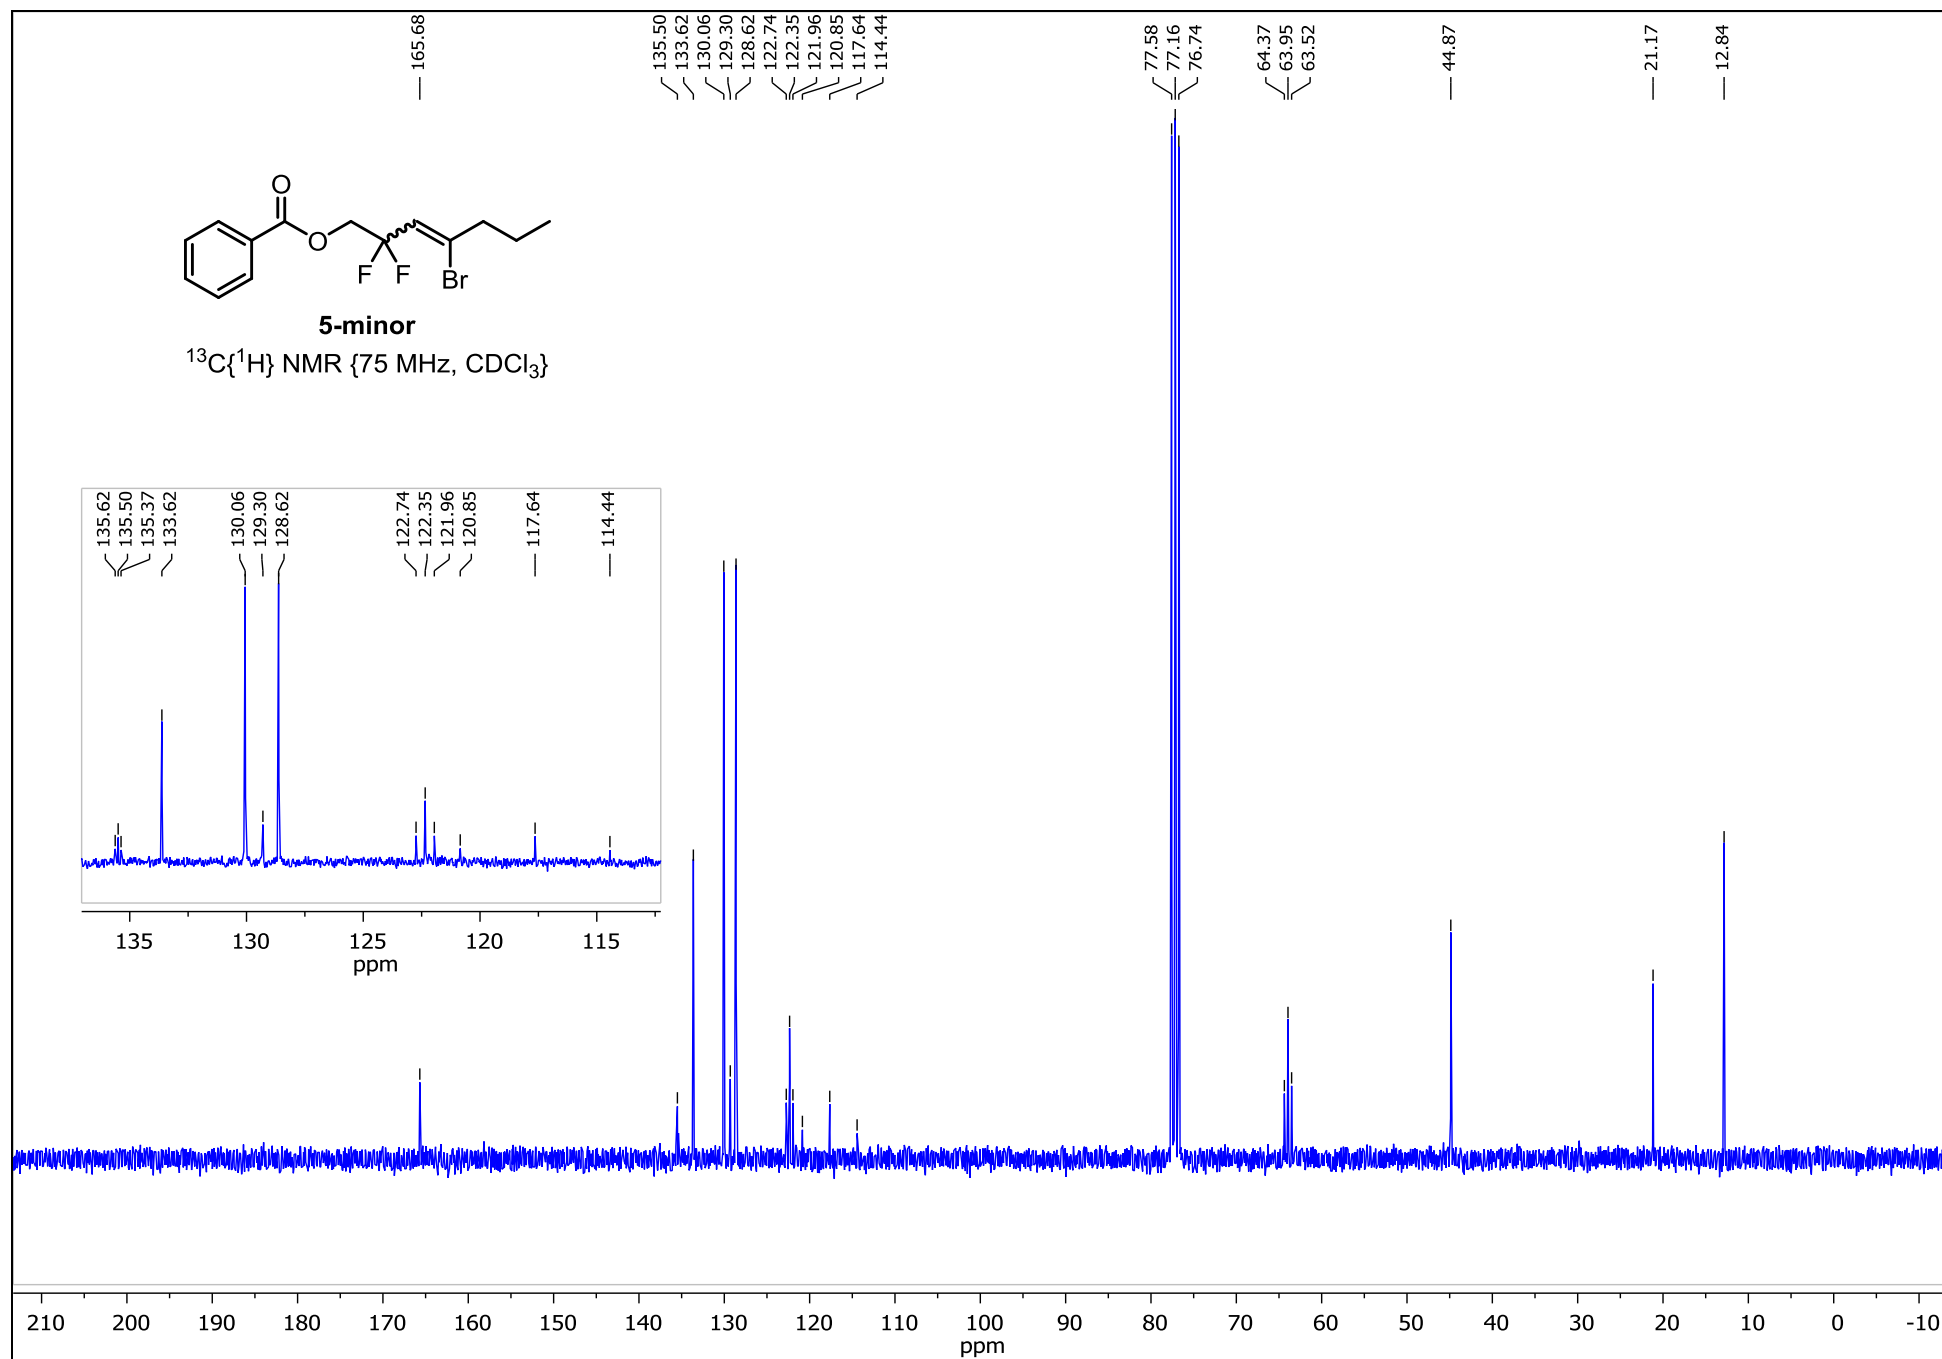

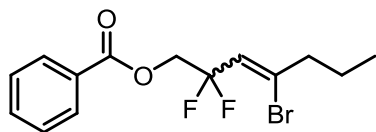**5-minor** $^{19}\text{F}$  NMR {282 MHz,  $\text{CDCl}_3$ }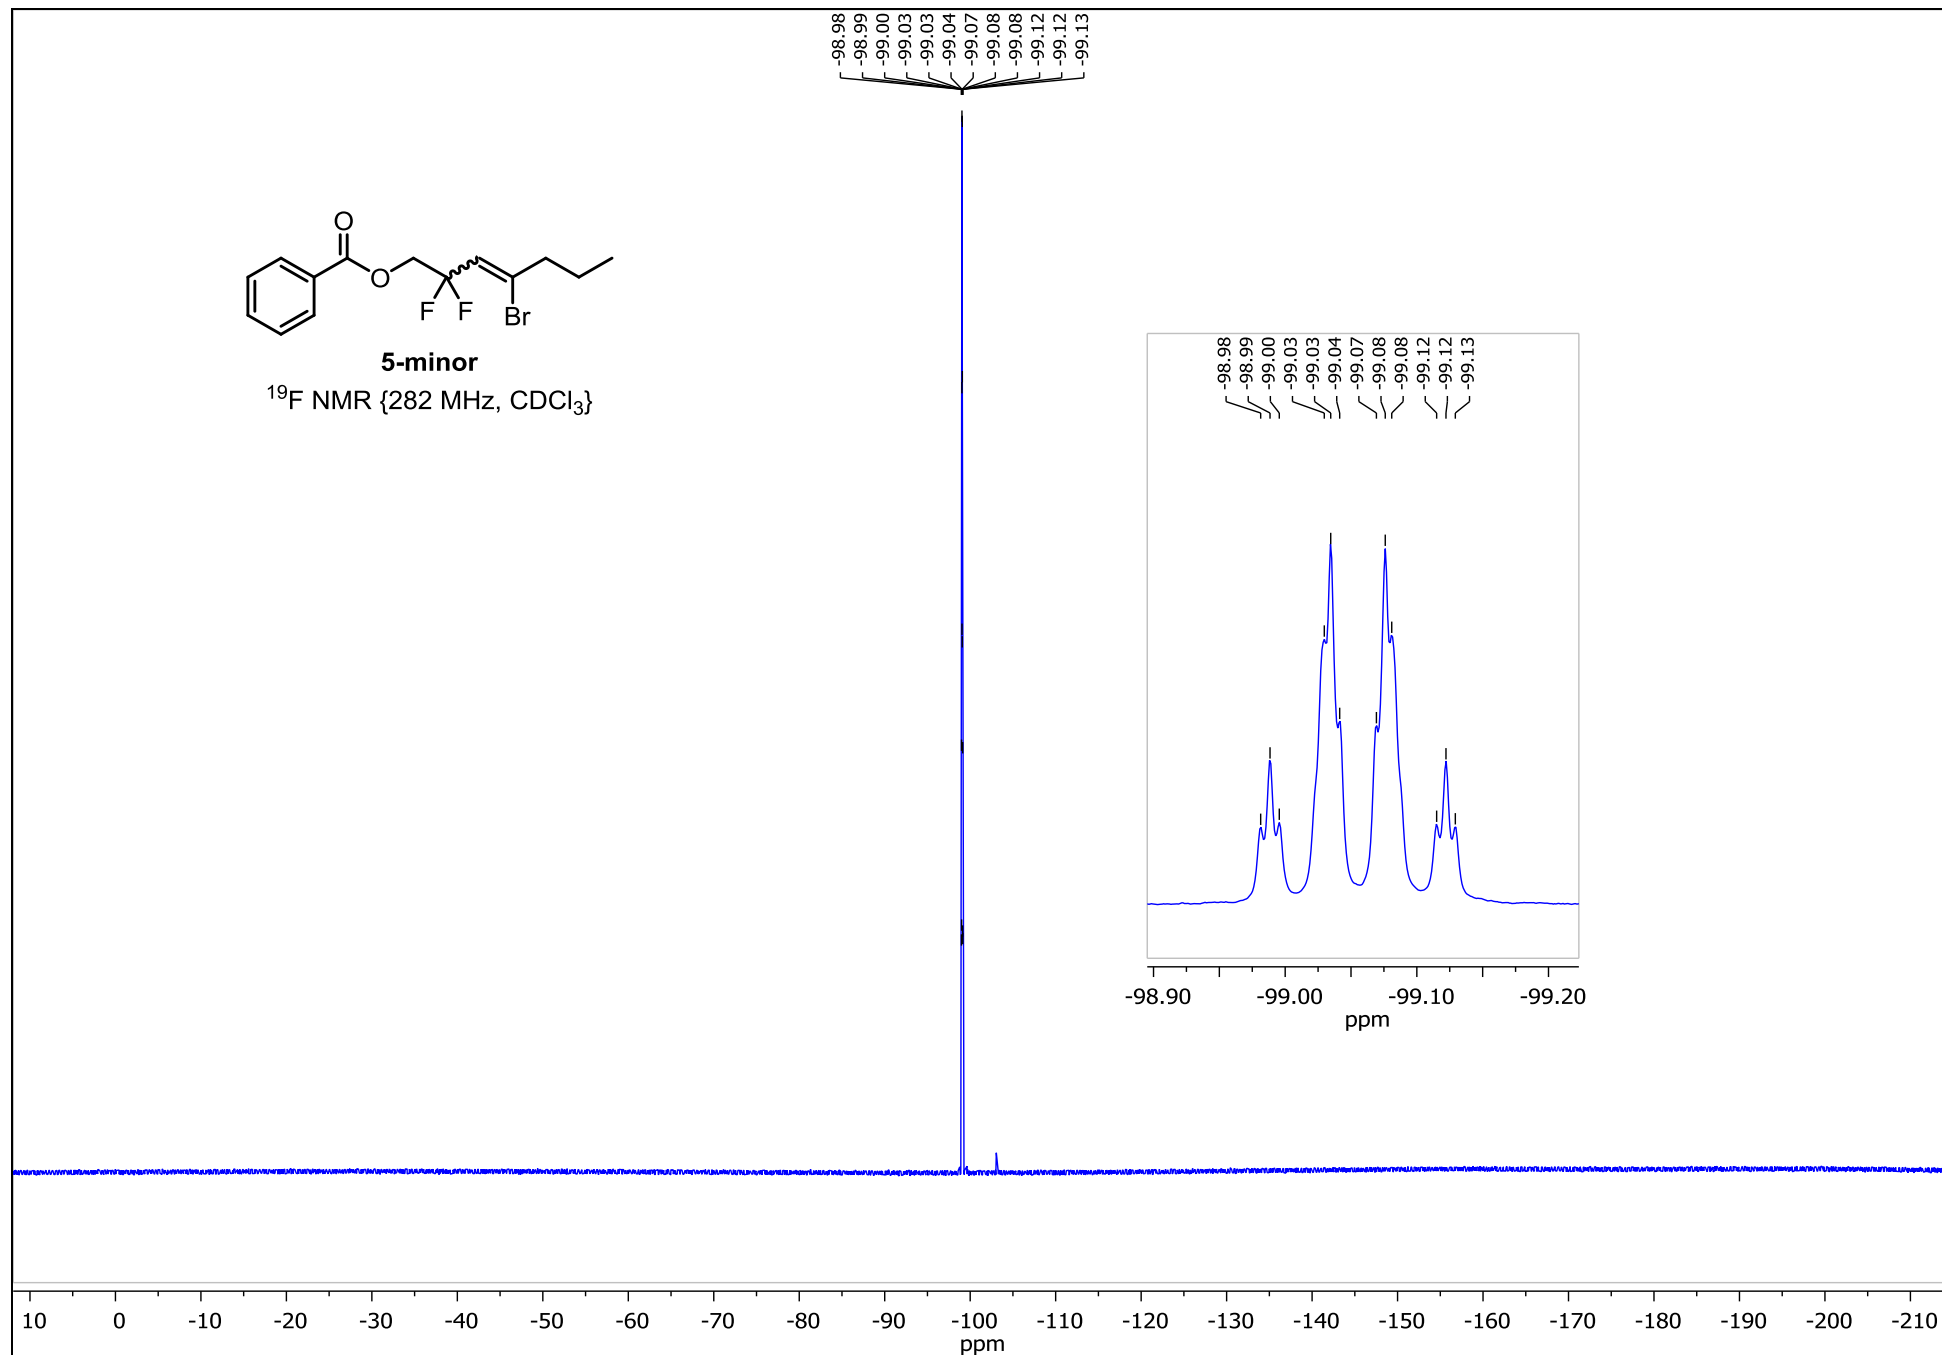

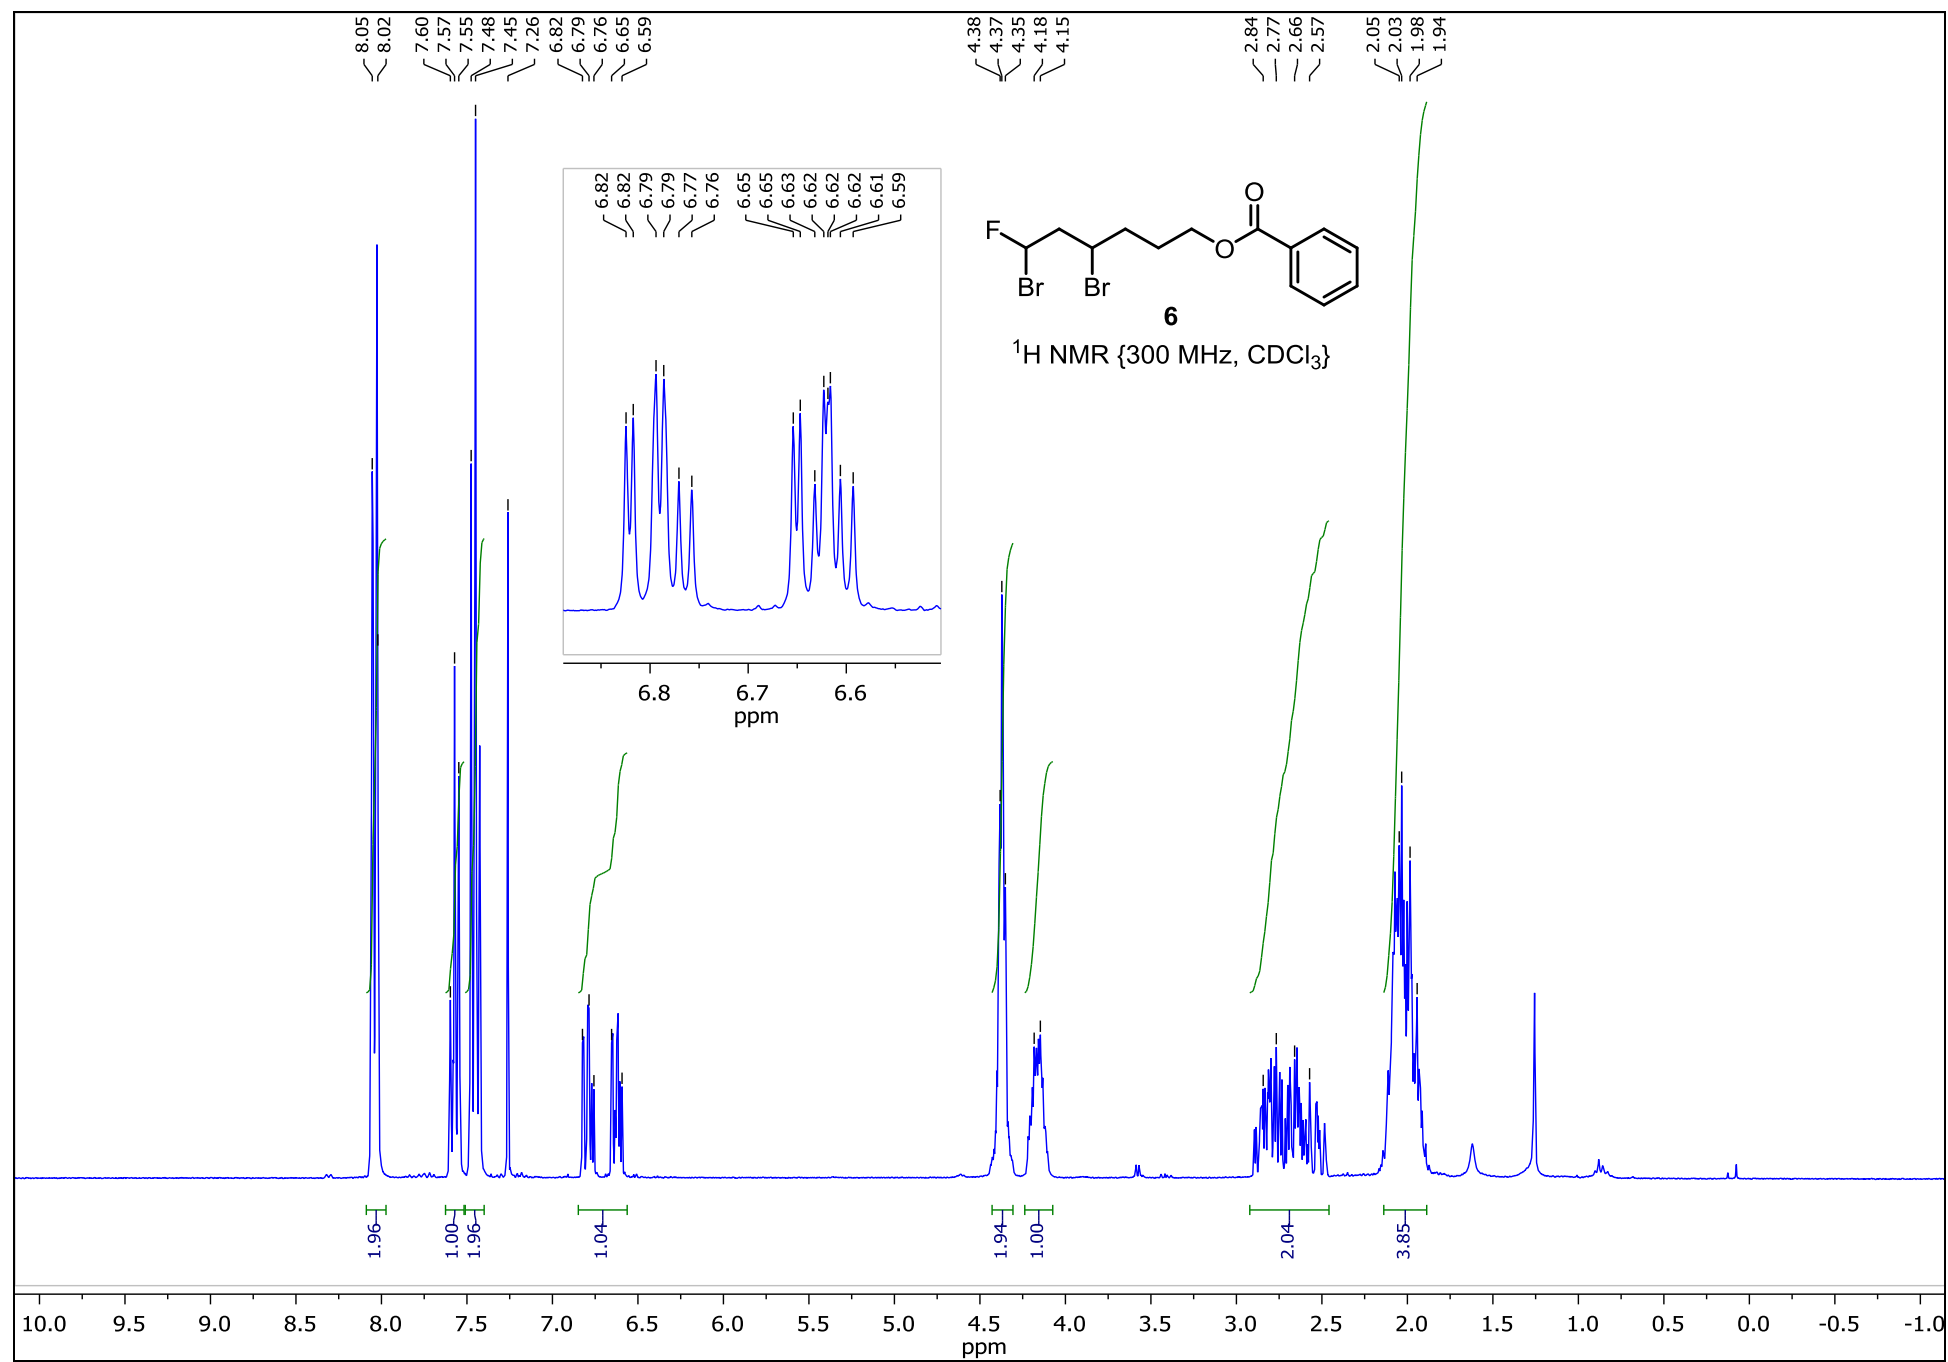

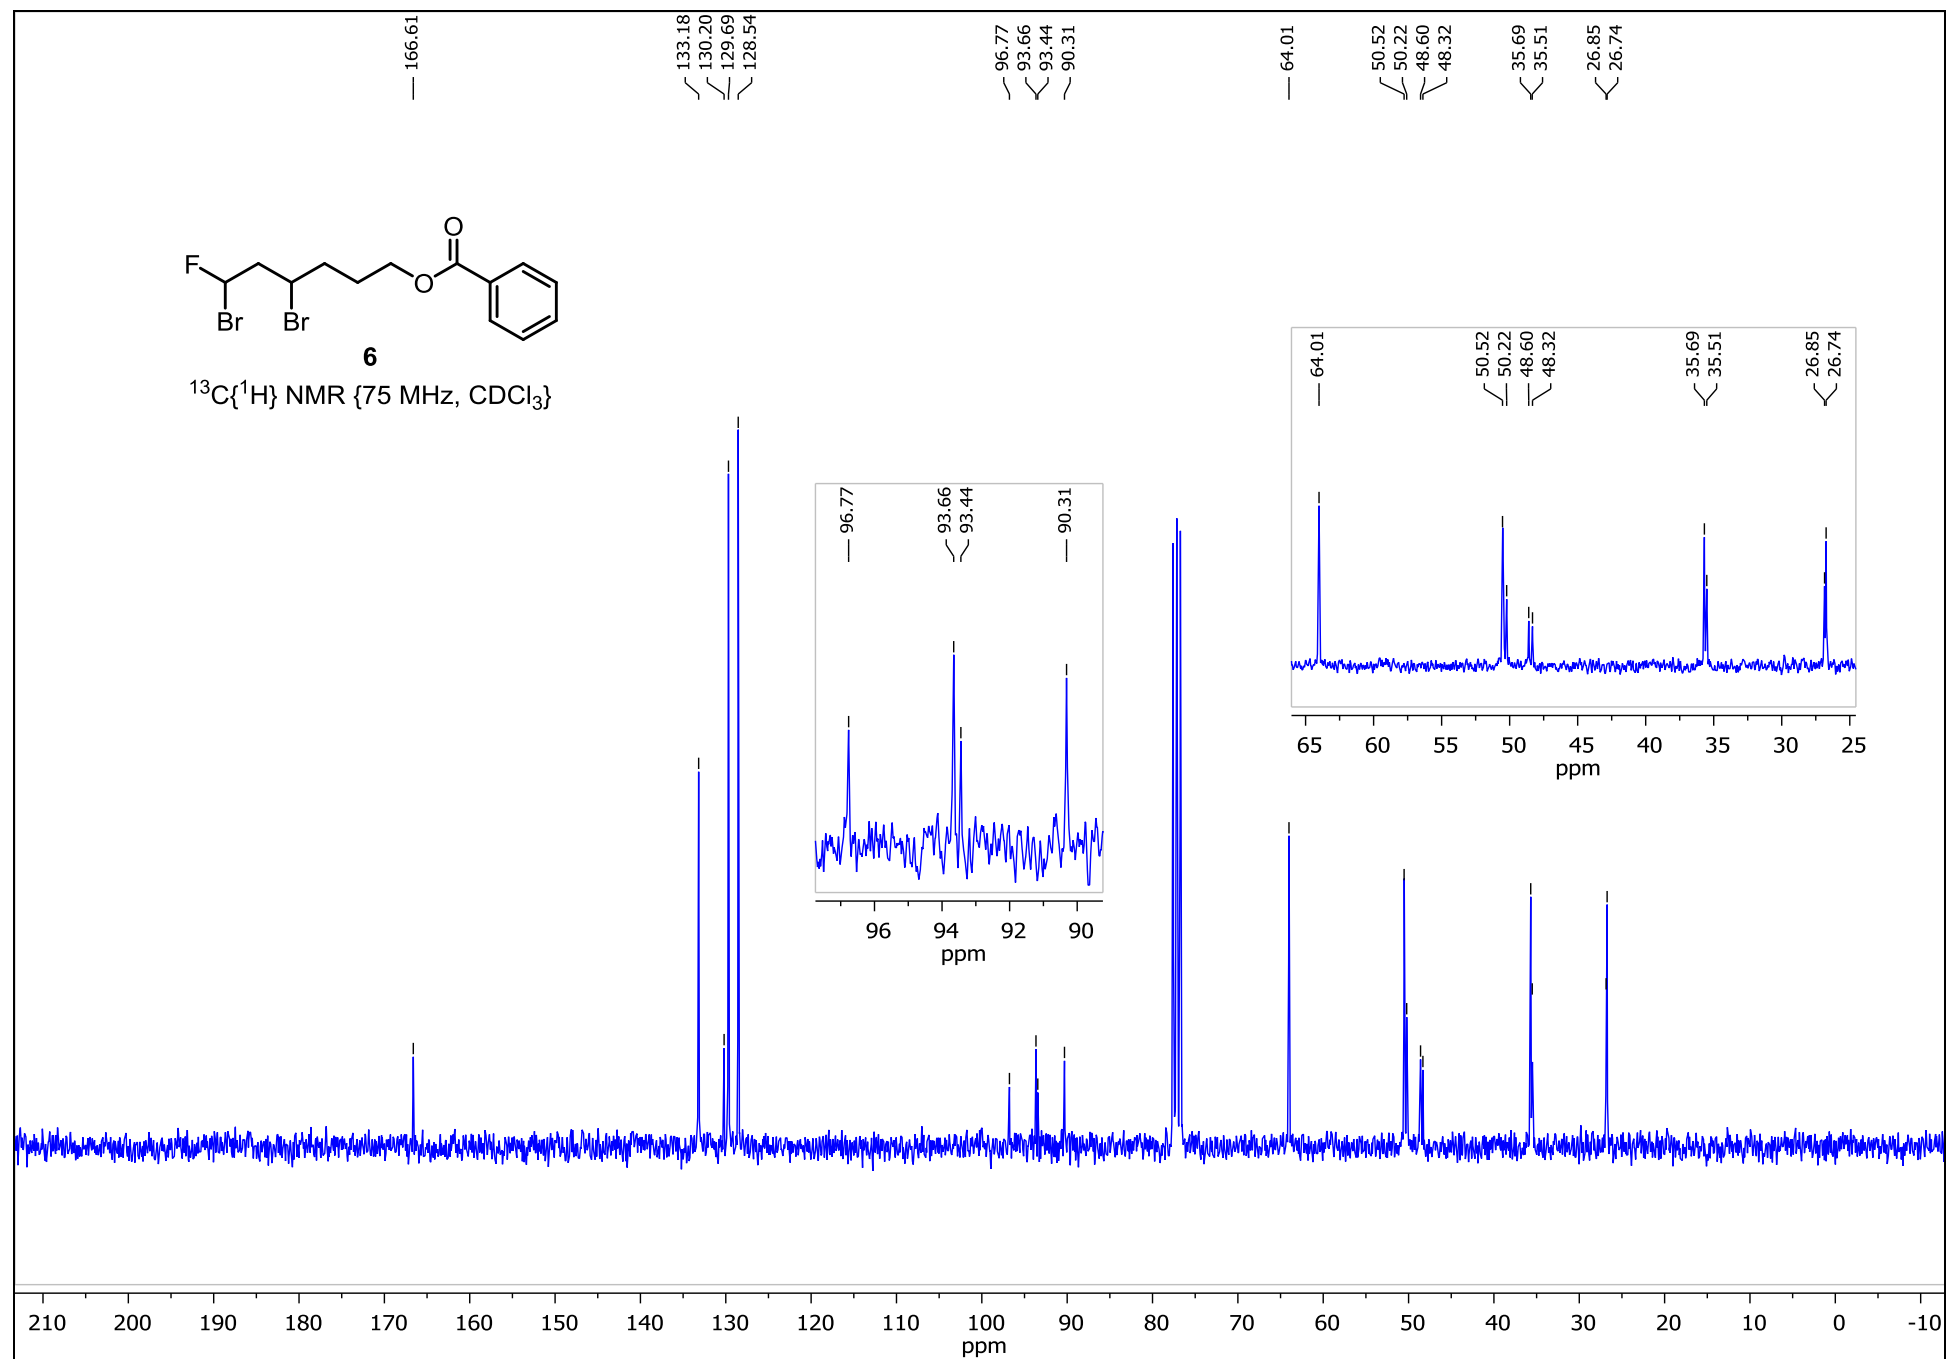

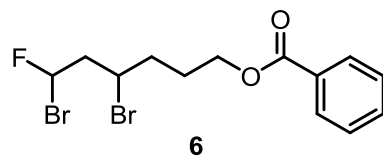

$^{19}\text{F}$  NMR {282 MHz,  $\text{CDCl}_3$ }

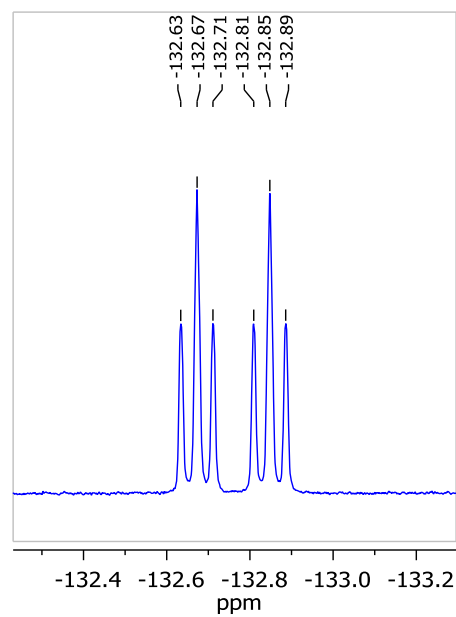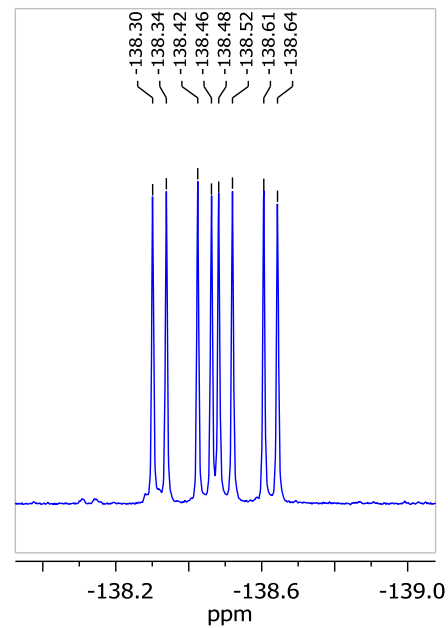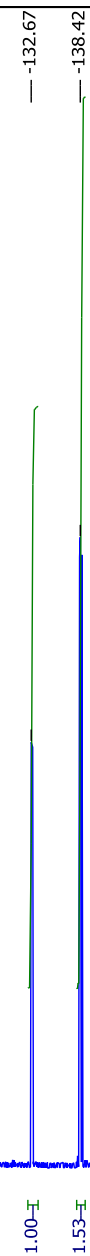

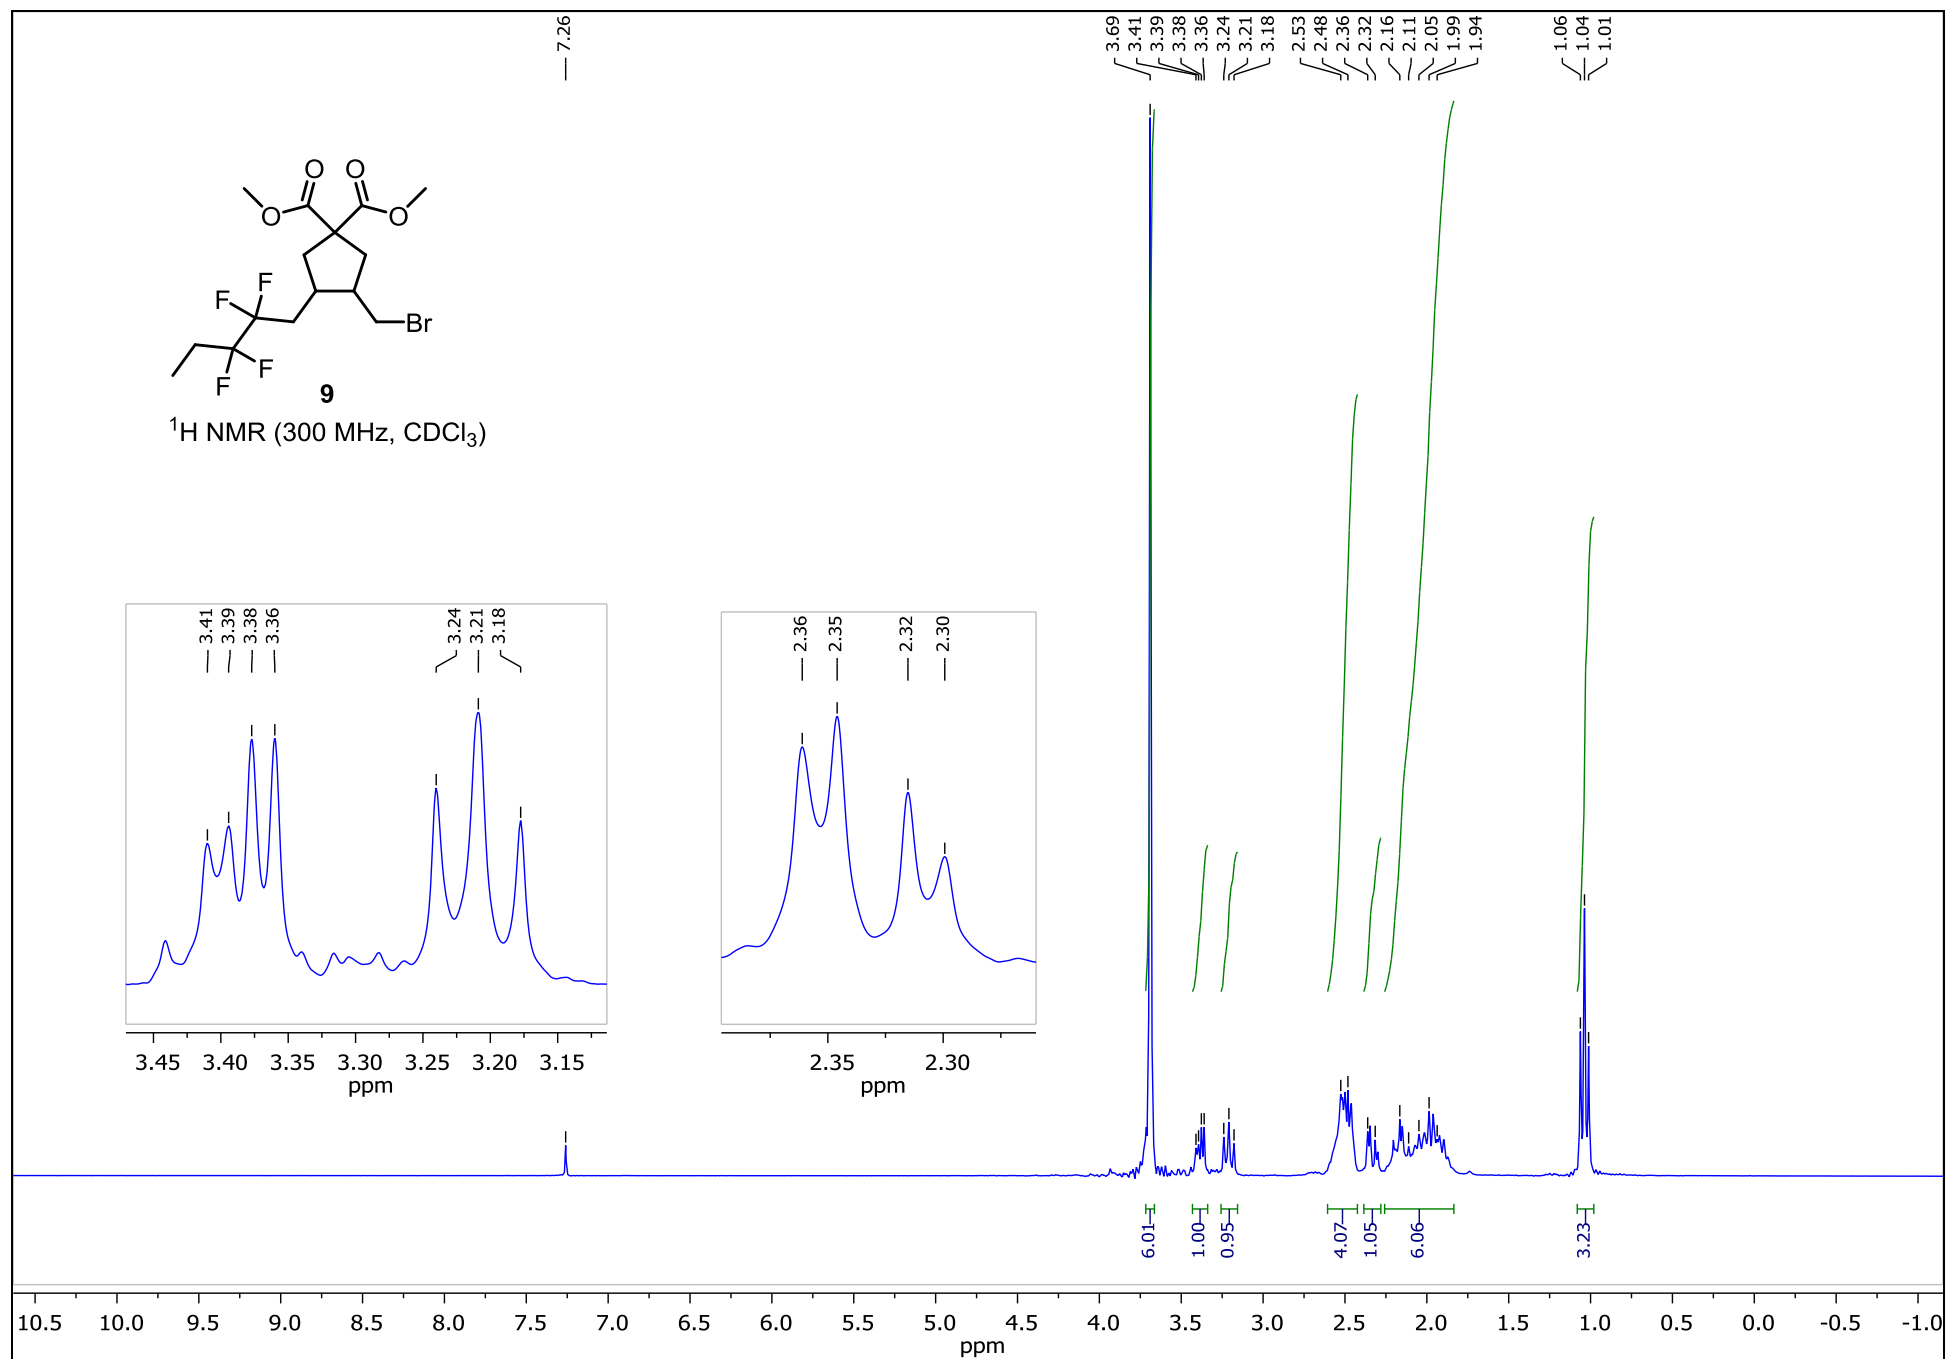

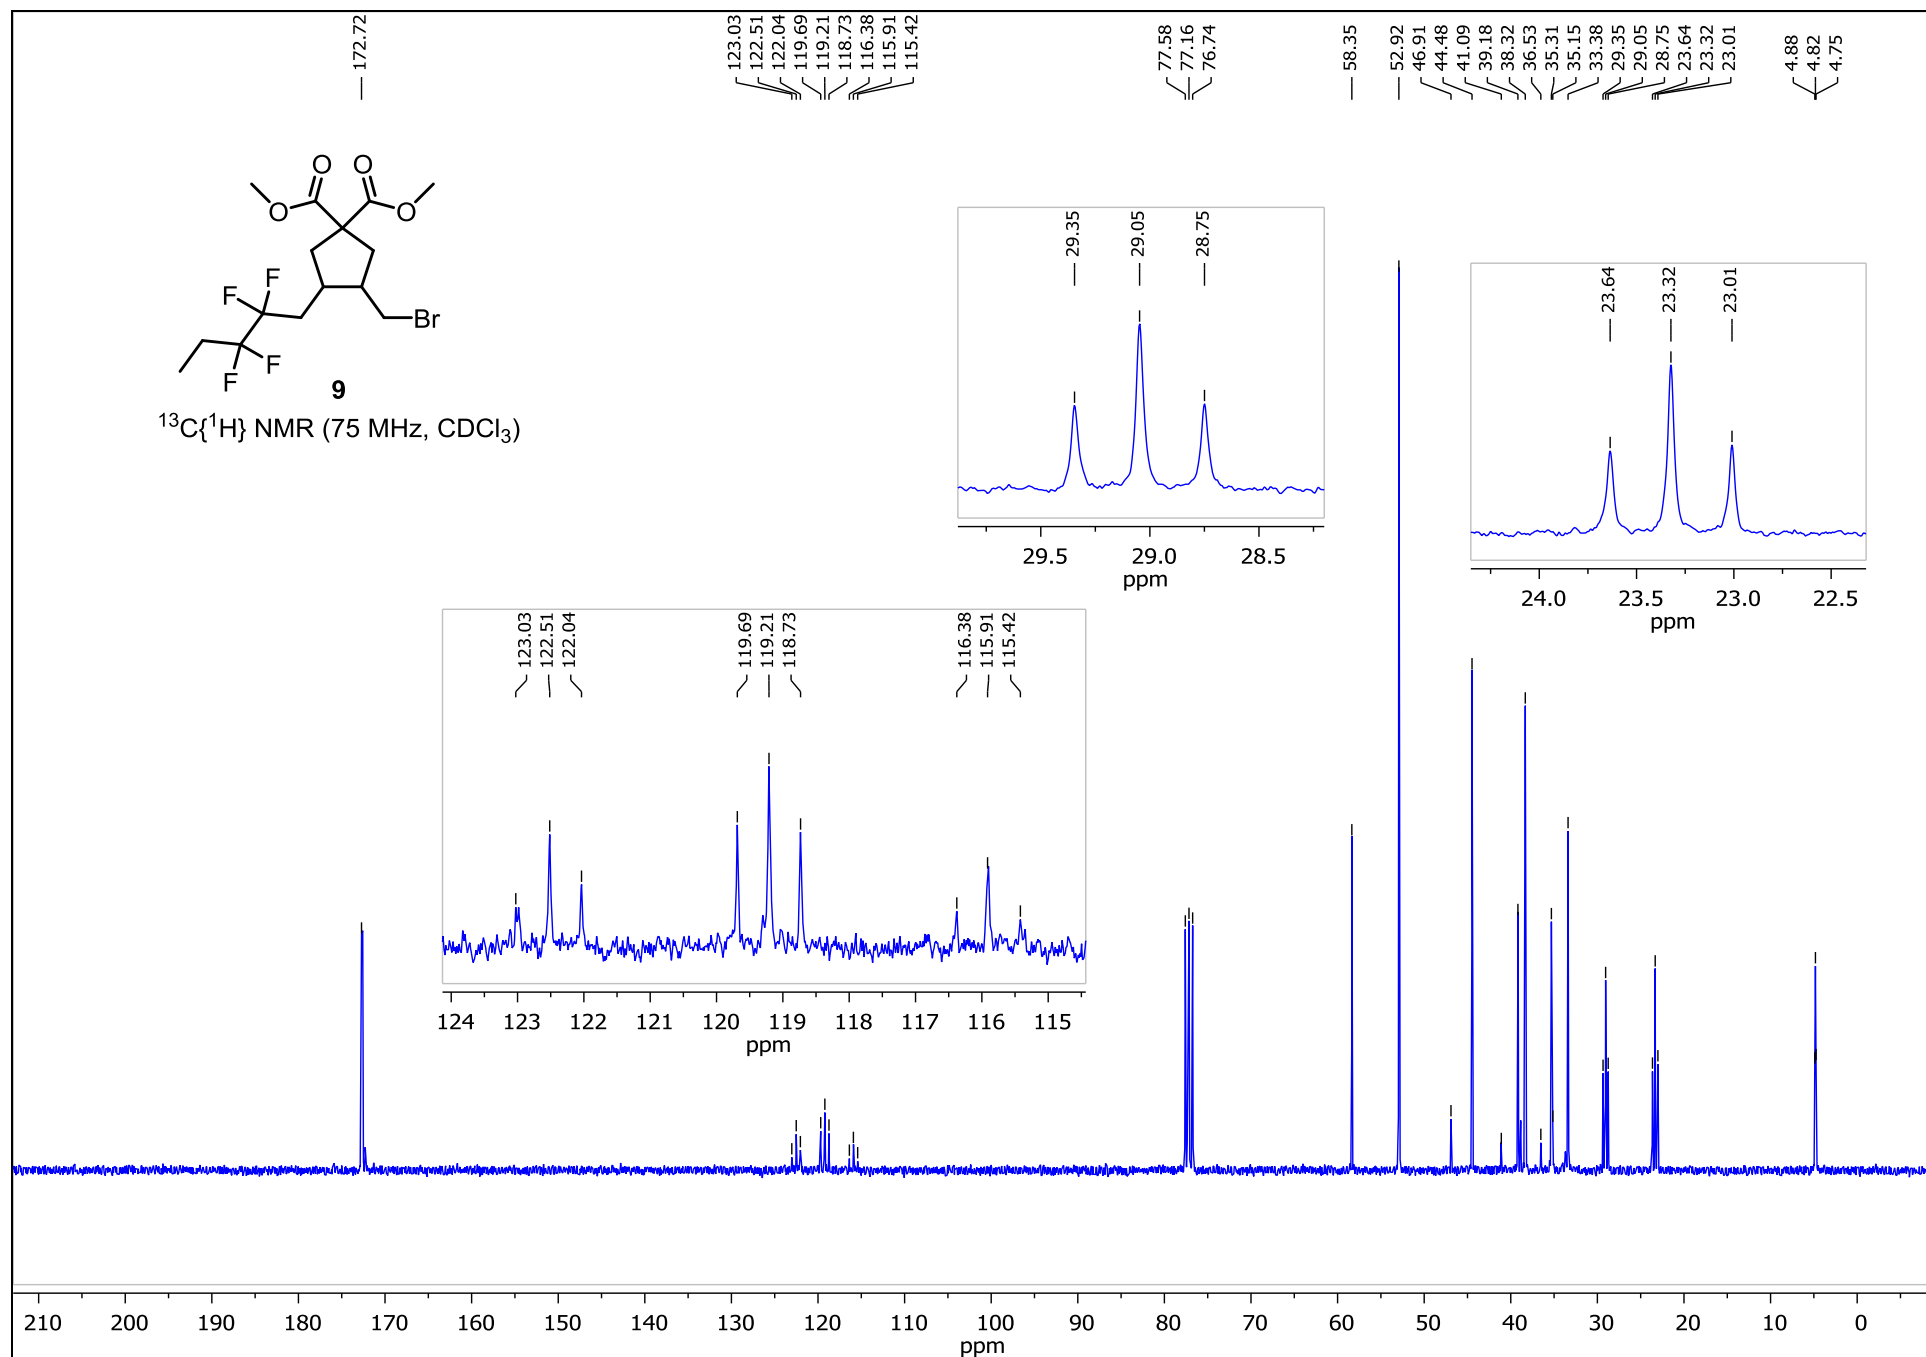



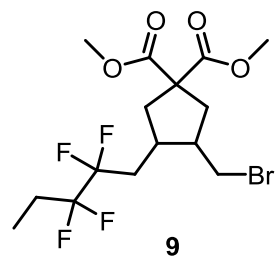

**9**  
 $^{19}\text{F}$  NMR (282 MHz,  $\text{CDCl}_3$ )

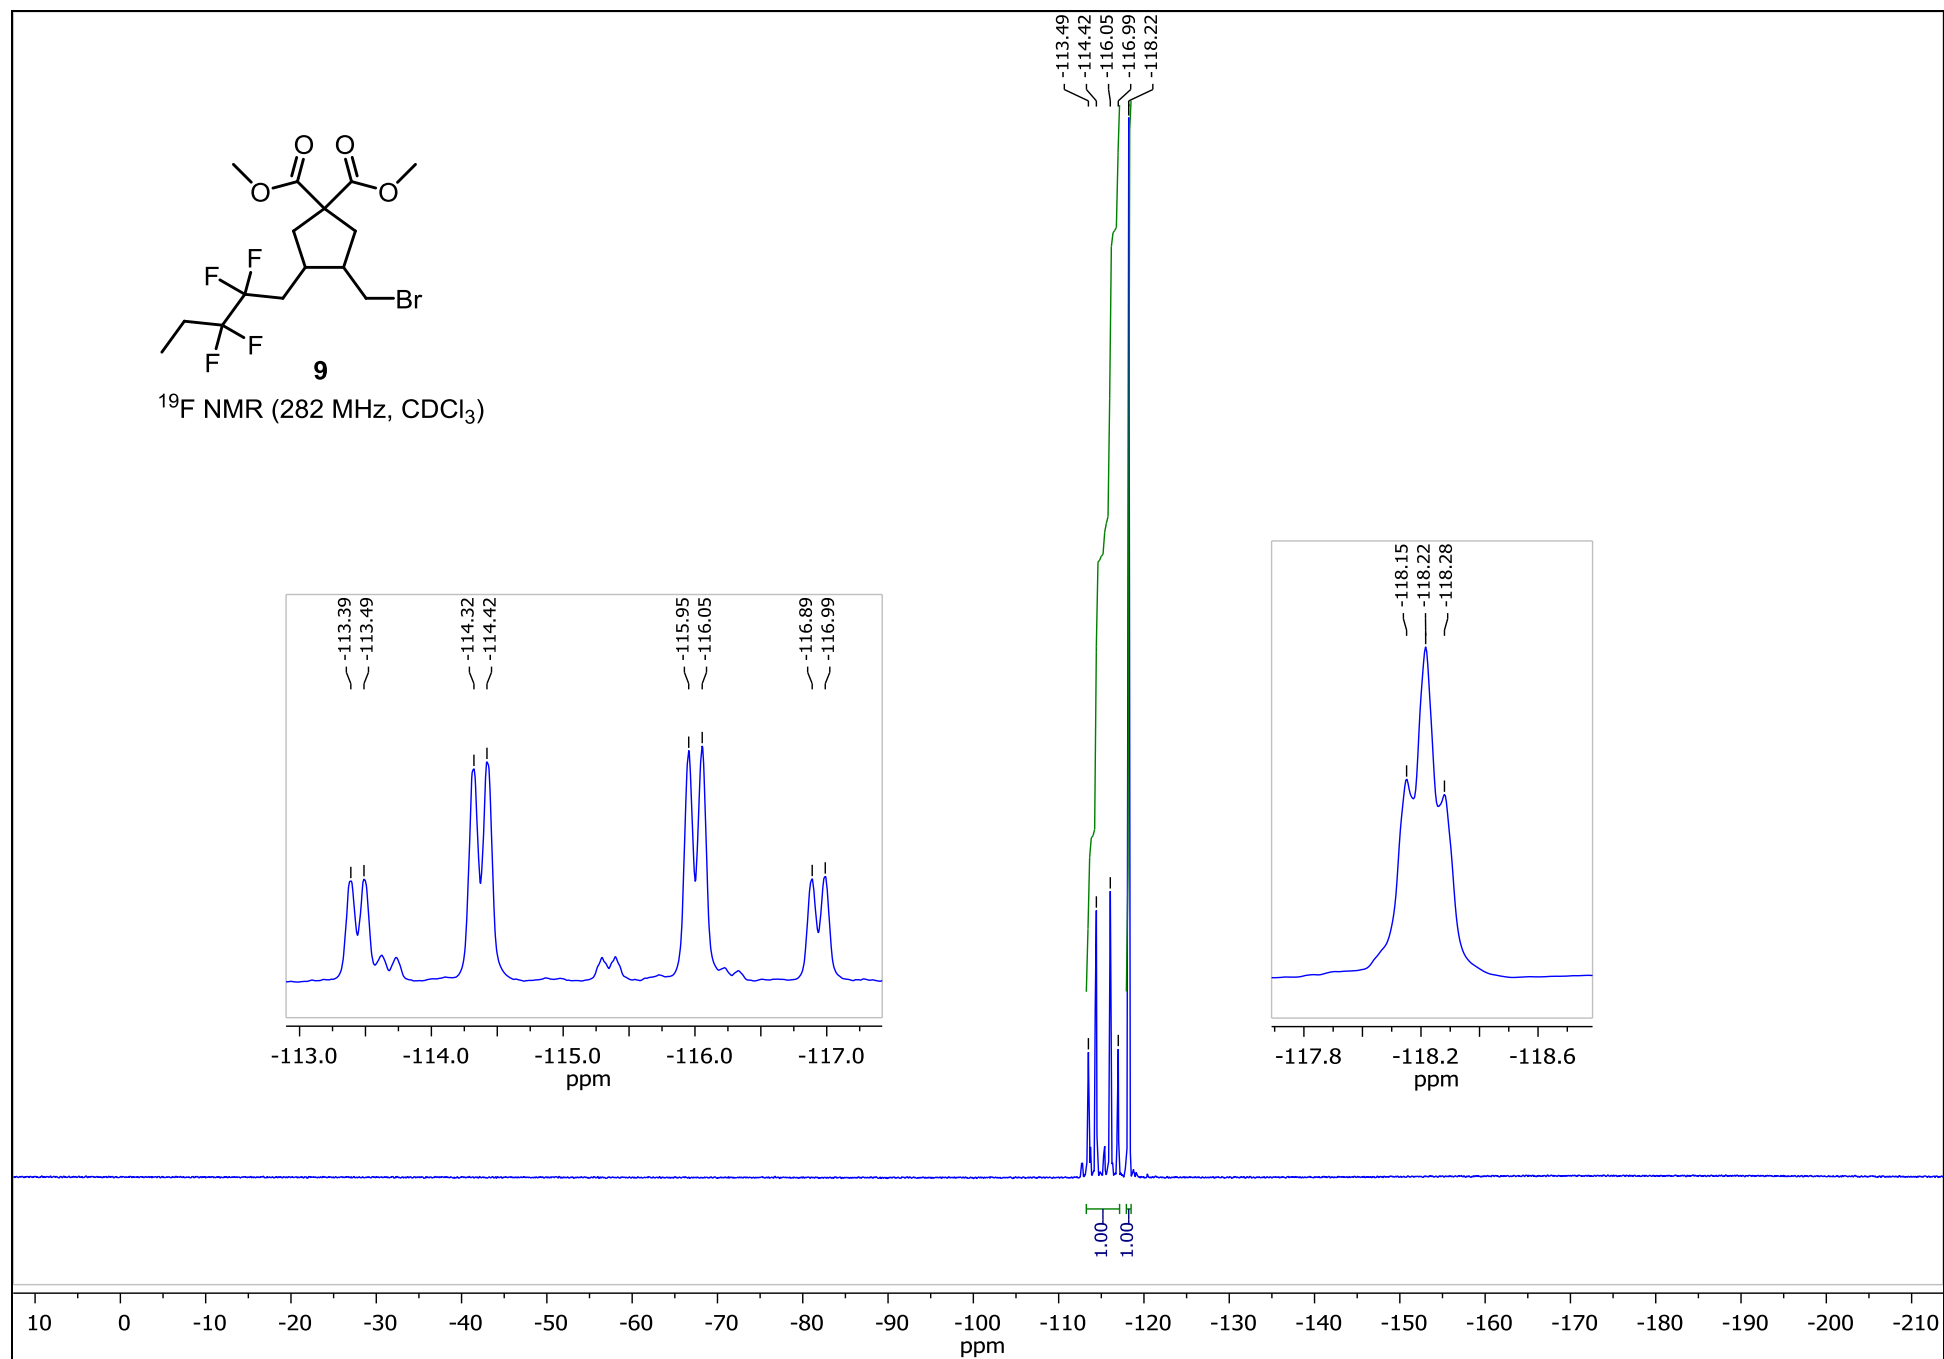

Supplement: d1cc01609a1.pdf [file d1cc01609a1.pdf]
